# Supplementary material
Source: PubMed Central journal article supplement (PMC3610185)

# SUPPORTING INFORMATION

## Structure Activity Relationship Study of the Cleistroside/Cleistetroside natural products for Antibacterial/Anticancer Activity

Pei Shi,<sup>†||</sup> Michelle C. Silva,<sup>†||</sup> Hua-Yu Leo Wang,<sup>†||</sup> Bulan Wu,<sup>‡||</sup> Novruz G.

Akhmedov,<sup>\*‡</sup> Miaosheng Li,<sup>\*§</sup> Penny J. Beuning,<sup>\*†</sup> George A. O'Doherty<sup>\*†</sup>

<sup>†</sup>Department of Chemistry and Chemical Biology, Northeastern University, Boston,  
MA 02115, <sup>‡</sup>Department of Chemistry, West Virginia University, Morgantown, WV

26506, <sup>§</sup>Protea Biosciences, Morgantown, WV 26507

## Table of contents

**Section A: General Methods**

**Section B: Synthetic Procedures**

**Section C: Antibacterial Activity MIC Assays**

**Section D: MTT Colorimetric Assays**

**Section E: NCI Growth Inhibition Assays**

**Section F: <sup>1</sup>H NMR and <sup>13</sup>C NMR Spectra**

## Section A: General Methods

Air- and/or moisture-sensitive reactions were carried out under an atmosphere of argon/nitrogen using oven-dried glassware and standard syringe/septa techniques. Ether, tetrahydrofuran, methylene chloride and methanol were dried by passing through activated alumina column with argon gas pressure. Hexanes refer to the petroleum fraction bp 40-60 °C. Commercial reagents were used without purification unless otherwise noted. Flash chromatography was performed using the indicated solvent system on silica gel standard grade 60 (230-400 mesh). Rf values are reported for analytical TLC using the specified solvents and 0.25 mm silica gel 60 F254 plates that were visualized by UV irradiation (254 nm) or by staining (465 mL of 95% EtOH, 17 mL conc. H<sub>2</sub>SO<sub>4</sub>, 5 mL acetic acid, and 13 mL anisaldehyde). Optical rotations were obtained using a digital polarimeter at sodium D line (589 nm) and were reported in concentration of g / 100 mL at 21 °C. <sup>1</sup>H and <sup>13</sup>C spectra were recorded on 600 M spectrometer, Chemical shifts are reported relative to CHCl<sub>3</sub> (δ 7.26 ppm) for <sup>1</sup>H and CHCl<sub>3</sub> (δ 77.0 ppm) for <sup>13</sup>C. IR was recorded on FT-IR Spectrometer; thin film was formed in CHCl<sub>3</sub> solution. Melting points are uncorrected.

## Section B: Synthetic Procedures

(*S*)-1-(furan-2-yl)ethanol (A)<sup>1</sup>

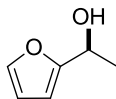

To a solution of acylfuran 11 (70 g, 636 mmol) in 90 ml CH<sub>2</sub>Cl<sub>2</sub> was added the mixed solution of formic acid/triethylamine (1:1, 120 mL) and Noyori asymmetric transfer hydrogenation catalyst (*R*)-Ru(η<sup>6</sup>-mesitylene)-(*S*, *S*)-TsDPEN (167 mg, 0.04 mol%). The resulting solution was stirred at room temperature for 72 h. The reaction mixture was diluted with water (1000 mL) and extracted with EtOAc (3 x 700 mL). The combined organic layers were washed with saturated NaHCO<sub>3</sub>, dried over Na<sub>2</sub>SO<sub>4</sub>, and concentrated under reduced pressure. The crude product was purified by silica gel flash chromatography eluting with 30% EtOAc/hexane to give furan alcohol A (58.4 g, 521.5 mmol, 82%): colorless oil; R<sub>f</sub> (30% EtOAc/hexane) = 0.41; [α]<sub>D</sub><sup>25</sup> = + 21 (c = 1.0, CH<sub>2</sub>Cl<sub>2</sub>); IR (thin film, cm<sup>-1</sup>) 3360, 2980, 2935, 1668, 1505, 1467, 1370, 1229, 1149, 1007, 877, 734; <sup>1</sup>H NMR (600 MHz, CDCl<sub>3</sub>) δ 7.30 (d, J = 1.8, 1H), 6.26 (dd, J = 3.0, 1.8 Hz, 1H), 6.15 (d, J = 3.0, 1H), 4.78 (dq, J = 6.6, 6.6 Hz, 1H), 3.11 (s, 1H), 1.46 (d, J = 6.6 Hz, 3H); <sup>13</sup>C NMR (150 MHz, CDCl<sub>3</sub>) δ 157.7, 141.6, 109.9, 104.9, 63.3, 21.1.

(2*S*, 6*R*)-6-hydroxy-2-methyl-2H-pyran-3(6H)-one (B):

---

<sup>1</sup> Spectral data of compounds 13, C, D, 14, E, F, 15, 16 and 17 were reported previously, see: Wu, B.; Li, M.; O'Doherty, G. A. *Org. Lett.* **2010**, *12*, 5466–5469.

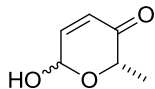

Compound furan alcohol A (33.6 g, 300 mmol), 330 mL of THF, and 110 mL of H<sub>2</sub>O were added to a 1000 ml round bottom flask and cooled to 0 °C. Solid NaHCO<sub>3</sub> (45 g, 549 mmol), NaOAc•3H<sub>2</sub>O (75 g, 551 mmol), and NBS (54 g, 305 mmol) were added to the solution and the mixture was stirred for 1 h at 0 °C. The reaction was quenched with saturated NaHCO<sub>3</sub> (450 mL), extracted (3 x 600 mL) with Et<sub>2</sub>O, dried Na<sub>2</sub>SO<sub>4</sub>, concentrated under reduced pressure and purified by silica gel chromatography eluting with 25% EtOAc/hexane to give pyranone B (34.8 g, 272 mmol, 90%): R<sub>f</sub> (60% EtOAc/hexane) = 0.29; [α]<sub>D</sub><sup>25</sup> = + 44 (c = 1.0, CH<sub>2</sub>Cl<sub>2</sub>); IR (thin film, cm<sup>-1</sup>) 3381, 2988, 2942, 1692, 1447, 1373, 1232, 1021, 937; <sup>1</sup>H NMR (600 MHz, CDCl<sub>3</sub>) major isomer δ 6.82 (dd, J = 10.2, 3.0 Hz, 1H), 5.96 (d, J = 10.2, 1H), 5.48 (d, J = 3.0 Hz, 1H), 3.99 (q, J = 7.2 Hz, 1H), 1.23 (d, J = 7.2 Hz, 3H); <sup>13</sup>C NMR (150 MHz, CDCl<sub>3</sub>) major isomer δ 197.6, 145.3, 126.6, 87.2, 74.8, 15.1.

**(2*S*, 6*S*)-tert-butyl -5,6-dihydro-6-methyl-5-oxo-2H-pyran-2-yl carbonate (12):**

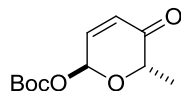

Pyronone alcohol B (30 g, 234.4 mmol) was dissolved in CH<sub>2</sub>Cl<sub>2</sub> (250 mL) and the solution was cooled to -78 °C. A CH<sub>2</sub>Cl<sub>2</sub> (50 mL) solution of (Boc)<sub>2</sub>O (70 g, 300 mmol) and a catalytic amount of DMAP (3 g, 23 mmol) was added to the reaction mixture. The reaction was stirred for 1 h at -78 °C, and quenched with 500 mL of

saturated NaHCO<sub>3</sub>, extracted with Et<sub>2</sub>O (3 x 700 mL), dried over Na<sub>2</sub>SO<sub>4</sub>, and concentrated under reduced pressure. The crude product was purified using silica gel flash chromatography eluting with 6% EtOAc/hexane to give 40.5 g (177.6 mmol, 76%) of two diastereomers of Boc-protected pyranone 4 $\alpha$  and 4 $\beta$  in 2.5:1: Rf (20% Et<sub>2</sub>O/hexane) = 0.58; [ $\alpha$ ]<sub>D</sub><sup>25</sup> = +98 (c = 1.0, CH<sub>2</sub>Cl<sub>2</sub>); IR (thin film, cm<sup>-1</sup>) 2984, 2942, 1752, 1703, 1371, 1273, 1254, 1153, 938, 838; <sup>1</sup>H NMR (600 MHz, CDCl<sub>3</sub>)  $\delta$  6.78 (dd, J = 10.2, 3.6 Hz, 1H), 6.22 (d, J = 3.6 Hz, 1H), 6.09 (d, J = 10.2 Hz, 1H), 4.53 (q, J = 6.6 Hz, 1H), 1.40 (s, 9H), 1.28 (d, J = 6.6 Hz, 3H); <sup>13</sup>C NMR (150 MHz, CDCl<sub>3</sub>)  $\delta$  195.5, 151.7, 140.9, 128.2, 89.1, 83.3, 72.0, 27.5, 15.1; CIHRMS Calculated for [C<sub>11</sub>H<sub>16</sub>O<sub>5</sub>Na<sup>+</sup>]: 251.0890, Found: 251.0883.

**(1R, 5S)-1-dodecoxy-5-methyl-1H-pyran-4-one (13):**

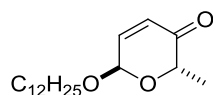

To a solution of Boc pyranone 12 (11.42 g, 50 mmol) and dodecan-1-ol (13.97 g, 75 mmol) in 50 mL CH<sub>2</sub>Cl<sub>2</sub> at 0 °C was added 4Å molecular sieve (3.0 g) and PPh<sub>3</sub> (78.7 mg, 0.3 mmol). The mixture was stirred for 10 min and then Pd<sub>2</sub>(dba)<sub>3</sub>·CHCl<sub>3</sub> (77.6 mg, 0.075 mmol) was added. The reaction mixture was stirred and warmed to rt. After 2 h the reaction was quenched by adding 50 mL saturated NaHCO<sub>3</sub>, followed by extraction with Et<sub>2</sub>O (100 mL x 3). The organic layers were combined, washed by 50 mL saturated NaCl, dried over Na<sub>2</sub>SO<sub>4</sub> and concentrated under reduced. The crude

product was purified using silica gel flash chromatography eluting with 5~10% EtOAc/hexane to give pyranone 13 (12.86 g, 87%): Rf (30% EtOAc/hexane) = 0.65;  $[\alpha]_D^{25} = +24.72$  (c = 1.1, CH<sub>2</sub>Cl<sub>2</sub>); IR (thin film, cm<sup>-1</sup>) 2924, 2854, 1702, 1467, 1374, 1359, 1231, 1158, 1129, 1104, 1086, 1039, 843, 808, 723; <sup>1</sup>H NMR (600 MHz, CDCl<sub>3</sub>) δ 6.82 (dd, J = 10.2, 3.6 Hz, 1H), 6.06 (d, J = 10.2 Hz, 1H), 5.16 (d, J = 3.0 Hz, 1H), 4.55 (q, J = 6.6 Hz, 1H), 3.82 (dt, J = 6.6, 9.6 Hz, 1H), 3.57 (dt, J = 6.6, 9.6 Hz, 2H), 1.61 (m, 2H) 1.38 (d, J = 6.6 Hz, 3H), 1.26~1.37 (m, 20H), 0.87 (t, J = 6.6, 3H); <sup>13</sup>C NMR (150 MHz, CDCl<sub>3</sub>) δ 197.1, 143.6, 127.2, 93.2, 70.3, 69.5, 31.9, 29.68, 29.63, 29.61, 29.59, 29.56, 29.37, 29.32, 26.1, 22.7, 15.2, 14.1; HRMS (ESI) calcd for [C<sub>18</sub>H<sub>32</sub>O<sub>3</sub> + H]<sup>+</sup>: 297.2424, Found: 297.2425.

**(1R, 4R, 5S)-1-dodecoxy-5-methyl-1,4-dihydro-5H-pyran-4-ol (C):**

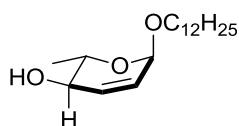

To a solution of compound 13 (12.0 g, 40.5 mmol) in CH<sub>2</sub>Cl<sub>2</sub> (40 mL) at -78 °C was added CeCl<sub>3</sub>/MeOH solution (0.4 M, 40 mL) and NaBH<sub>4</sub> (1.84 g, 48.6 mmol). The reaction mixture was stirred at -78 °C for 2 hours. The reaction mixture was quenched with 50 mL of saturated aqueous NaHCO<sub>3</sub>, extracted with Et<sub>2</sub>O (2 x 100 mL), dried (Na<sub>2</sub>SO<sub>4</sub>), and concentrated under reduced pressure. The crude product was purified using silica gel flash chromatography eluting with 5~20% EtOAc/hexane to give alcohol C (10.72 g, 89%): m.p. 39.1~40.2 °C; Rf (30% EtOAc/hexane) = 0.45;  $[\alpha]_D^{25}$

= - 24.92 (c = 1.36, CH<sub>2</sub>Cl<sub>2</sub>); IR (thin film, cm<sup>-1</sup>) 3383, 2922, 2854, 1458, 1378, 1325, 1297, 1190, 1129, 1147, 1132, 1102, 1046, 1002, 886, 845, 829, 721; <sup>1</sup>H NMR (600 MHz, CDCl<sub>3</sub>) δ 5.87 (d, J = 10.2 Hz, 1H), 5.68 (d, J = 10.2, 2.2 Hz, 1H), 4.88 (s, 1H), 3.72 (m, 1H), 3.58 (q, J = 6.6 Hz, 1H), 3.46 (t, J = 6.6 Hz, 1H), 3.43 (t, J = 6.6 Hz, 1H), 2.54 (d, J = 8.4 Hz, 1H), 1.54 (d, J = 6.6 Hz, 3H), 1.26 (t, 20H), 0.85 (t, J = 6.6 Hz, 3H); <sup>13</sup>C NMR (150 MHz, CDCl<sub>3</sub>) δ 197.1, 143.6, 127.2, 93.2, 70.3, 69.5, 31.9, 29.7, 29.6, 29.6, 29.6, 29.6, 29.4, 29.3, 26.1, 22.7, 15.2, 14.1; HRMS (ESI) calcd for [C<sub>18</sub>H<sub>34</sub>O<sub>3</sub> + Na]<sup>+</sup>: 321.2400, Found:321.2402.

**(3*S*,4*S*,5*R*)-2-(dodecyloxy)-6-methyltetrahydro-2H-pyran-3,4,5-triol (D):**

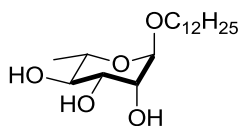

To a solution of allylic alcohol C (10.0 g, 33.5 mmol) in t-butanol/acetone (1:1, 67 mL) at 0 °C was added a solution of N-methyl morpholine N-oxide/water (50% w/v) (20 mL) and OsO<sub>4</sub> (42.6 mg, 0.168 mmol). The reaction mixture was stirred at rt for 12 h and then concentrated. The residue was pipetted directly on to a silica gel column using a small amount of CH<sub>3</sub>OH in three portions. Impurities were eluted with ether and the product was eluted with 90% EtOAc/Hexane. Pure fractions were combined and concentrated to afford triol D (10.22 g, 92%): R<sub>f</sub> (100% EtOAc/hexane) = 0.28; [α]<sub>D</sub><sup>25</sup> = - 45.80 (c = 1, CH<sub>2</sub>Cl<sub>2</sub>); IR (thin film, cm<sup>-1</sup>) 3384, 2922, 2854, 1457, 1380, 1224, 1131, 1094, 1053, 983, 910, 882, 837, 809, 721, 677; <sup>1</sup>H NMR (600 MHz,

CDCl<sub>3</sub>) δ 4.72 (s, 1H), 4.47 (s, 1H), 3.89 (s, 1H), 3.85 (s, 1H), 3.75 (dd, J = 9.0, 3.6 Hz, 1H), 3.62 (m, 1H), 3.46 (d, J = 9.0 Hz, 1H), 3.38 (t, J = 6.6 Hz, 1H), 3.35 (t, J = 6.6 Hz, 1H), 1.53 (d, J = 6.6 Hz, 3H), 1.26 (t, 20H), 0.85 (t, J = 6.6, 3H); <sup>13</sup>C NMR (150 MHz, CDCl<sub>3</sub>) δ 99.8, 72.8, 71.7, 71.1, 68.2, 67.9, 32.0, 29.8, 29.6, 29.6, 29.6, 29.6, 29.4, 29.4, 26.2, 22.8, 17.6, 14.2; HRMS (ESI) calcd for [C<sub>18</sub>H<sub>36</sub>O<sub>5</sub> + Na]<sup>+</sup>: 355.2455, Found: 355.2457.

(14):

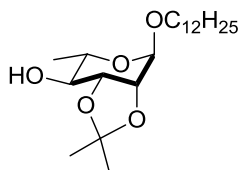

To a solution of triol D (10.0 g, 30.08 mmol) in acetone (80 mL) and 2,2-dimethoxypropane (74 mL, 600 mmol) at 0 °C was added p-Toluenesulfonic acid monohydrate (57 mg, 0.30 mmol). The reaction mixture was stirred for 4 h. The reaction mixture was neutralized with 2 mL of Et<sub>3</sub>N and then was concentrated under reduced pressure. The crude product was purified by silica gel flash chromatography eluting with 10~30% EtOAc/Hexane to give mono alcohol 14 (11.12 g, 99%): m.p. 56.0~57.2 °C; R<sub>f</sub> (50% EtOAc/hexane) = 0.65; [α]<sub>D</sub><sup>25</sup> = - 20.08 (c = 1.2, CH<sub>2</sub>Cl<sub>2</sub>); IR (thin film, cm<sup>-1</sup>) 3461, 2924, 2855, 1457, 1382, 1244, 1220, 1170, 1140, 1094, 1088, 1055, 1022, 998, 922, 861, 818, 787, 724; <sup>1</sup>H NMR (600 MHz, CDCl<sub>3</sub>) δ 4.93 (s, 1H), 4.13 (d, J = 6.0 Hz, 1H), 4.09 (dd, J = 7.2, 6.0 Hz, 1H), 3.68 (m, 2H), 3.42 (dq, J = 9.6, 6.6 Hz, 1H), 3.40 (dd, J = 9.6, 7.2 Hz, 1H), 2.34 (d, J = 4.2 Hz, 1H), 1.60 (s,



3H), 1.57 (m, 2H), 1.52 (s, 3H), 1.35 (s, 3H), 1.28 (m, 18H), 0.88 (t, J = 7.2 Hz, 3H);  $^{13}\text{C}$  NMR (150 MHz,  $\text{CDCl}_3$ )  $\delta$  109.5, 97.2, 78.4, 76.0, 74.5, 67.9, 66.1, 32.0, 29.7, 29.7, 29.7, 29.6, 29.5, 29.5, 29.4, 28.0, 26.2, 26.2, 22.8, 17.7, 14.2; HRMS (ESI) calcd for  $[\text{C}_{21}\text{H}_{40}\text{O}_5 + \text{H}]^+$ : 373.2948, Found: 373.2951.

**(E):**

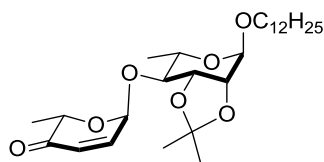

To a solution of Boc pyranone 12 (7.07 g, 30.98 mmol) and mono alcohol 14 (9.62 g, 25.82 mmol) in 30 mL  $\text{CH}_2\text{Cl}_2$  at 0 °C was added 4Å molecular sieve (2.0 g) and  $\text{PPh}_3$  (40.6 mg, 0.155 mmol). The mixture was stirred for 10 min and then  $\text{Pd}_2(\text{dba})_3 \cdot \text{CHCl}_3$  (40.4 mg, 0.039 mmol) was added. The reaction mixture was stirred and warmed to rt. After 2 h the reaction was quenched by adding 30 mL saturated  $\text{NaHCO}_3$ , followed by extraction with  $\text{Et}_2$  (80 mL  $\times$  3). The organic layers were combined, washed by 50 mL saturated  $\text{NaCl}$ , dried over  $\text{Na}_2\text{SO}_4$  and concentrated under reduced. The crude product was purified using silica gel flash chromatography eluting with 5~15%  $\text{EtOAc}$ /hexane to give pyranone E (11.08 g, 89%):  $R_f$  (30%  $\text{EtOAc}$ /hexane) = 0.62;  $[\alpha]_D^{25} = -11.70$  (c = 1,  $\text{CH}_2\text{Cl}_2$ ); IR (thin film,  $\text{cm}^{-1}$ ) 2985, 2924, 2855, 1702, 1455, 1381, 1241, 1221, 1161, 1139, 1083, 1045, 1021, 990, 862, 788, 726;  $^1\text{H}$  NMR (600 MHz,  $\text{CDCl}_3$ )  $\delta$  6.84 (dd, J = 10.2, 3.6 Hz, 1H), 6.06 (d, J = 10.2 Hz, 1H), 5.76 (d, J = 3.0 Hz, 1H), 4.95 (s, 1H), 4.52 (q, J = 6.6 Hz, 1H), 4.21 (dd, J = 6.6, 6.0 Hz, 1H), 4.11

(d,  $J = 6.0$  Hz, 1H), 3.67 (m, 3H), 3.41 (dt,  $J = 9.6, 6.6$  Hz, 1H), 1.66 (s, 3H), 1.56 (m, 2H), 1.33 (m, 9H), 1.26 (m, 18H), 0.87 (t,  $J = 6.6$  Hz, 3H);  $^{13}\text{C}$  NMR (150 MHz,  $\text{CDCl}_3$ )  $\delta$  197.0, 143.7, 127.1, 127.1, 109.6, 97.0, 92.4, 79.0, 79.0, 76.5, 70.5, 67.8, 64.0, 32.0, 29.7, 29.7, 29.6, 29.5, 29.5, 29.4, 28.1, 26.5, 26.2, 22.7, 17.5, 15.2, 14.2; HRMS (ESI) calcd for  $[\text{C}_{27}\text{H}_{46}\text{O}_7 + \text{Na}]^+$ : 505.3136, Found: 505.3140.

**(F):**

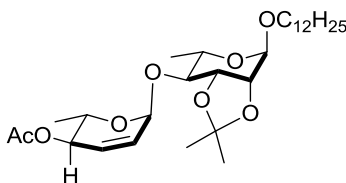

To a solution of disaccharide pyranone E (10.88 g, 22.54 mmol) in  $\text{CH}_2\text{Cl}_2$  (25 mL) at  $-78$  °C was added  $\text{CeCl}_3/\text{MeOH}$  solution (0.4 M, 25 mL) and  $\text{NaBH}_4$  (1.02 g, 27.05 mmol). The reaction mixture was stirred at  $-78$  °C for 2 hours. The reaction mixture was quenched with 30 mL of saturated aqueous  $\text{NaHCO}_3$ , extracted (2 x 100 mL) with  $\text{Et}_2\text{O}$ , dried ( $\text{Na}_2\text{SO}_4$ ), and concentrated under reduced pressure. The crude product was purified using silica gel flash chromatography eluting with 10~25%  $\text{EtOAc}/\text{Hexane}$  to give the allylic alcohol as a yellow oil. To a solution of the allylic alcohol in pyridine (40 mL) was added acetic anhydride (15 mL) and a catalytic amount of 4-dimethylaminopyridine (50 mg). After stirring for 3 h, the mixture was diluted in ether, washed with saturated  $\text{CuSO}_4$  solution (3 x 100 mL) and the solvent was evaporated. The crude product was purified by silica gel flash chromatography eluting with 5~15%  $\text{EtOAc}/\text{Hexane}$  to give ester F (9.83g, 83% in two steps) as a

yellow oil: Rf (30% EtOAc/hexane) = 0.62;  $[\alpha]_D^{25} = -46.20$  (c = 1.50, CH<sub>2</sub>Cl<sub>2</sub>); IR (thin film, cm<sup>-1</sup>) 2925, 2855, 1740, 1454, 1404, 1374, 1234, 1194, 1138, 1084, 1044, 1024, 988, 917, 861, 815, 723; <sup>1</sup>H NMR (600 MHz, CDCl<sub>3</sub>) δ 5.83 (m, 2H), 5.49 (s, 1H), 5.04 (d, J = 9.0 Hz, 1H), 4.94 (s, 1H), 4.19 (dd, J = 7.2, 6.0 Hz, 1H), 4.09 (d, J = 5.4 Hz, 1H), 3.91 (dq, J = 9.0, 6.0 Hz, 1H), 3.66 (m, 2H), 3.60 (dd, J = 9.6, 7.2 Hz, 1H), 3.10 (dt, J = 9.6, 6.6 Hz, 1H), 2.08 (s, 3H), 1.61 (s, 3H), 1.56 (m, 2H), 1.34 (s, 3H), 1.27 (m, 21H), 1.20 (d, J = 6.0 Hz, 3H), 0.88 (t, J = 6.6 Hz, 3H); <sup>13</sup>C NMR (150 MHz, CDCl<sub>3</sub>) δ 137.5, 132.7, 128.5, 128.0, 127.8, 127.3, 99.7, 99.6, 99.4, 95.2, 74.9, 69.9, 69.0, 68.9, 68.8, 68.0, 67.2, 48.0, 47.7, 18.0, 17.9, 17.8, 16.7; HRMS (ESI) calcd for [C<sub>29</sub>H<sub>50</sub>O<sub>8</sub> + Na]<sup>+</sup>: 549.3398, Found: 549.3402.

**(15):**

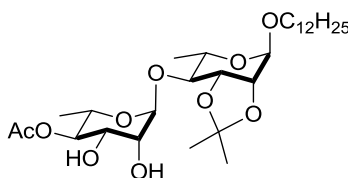

To a solution of allylic ester F (9.22 g, 17.5 mmol) in t-butanol/acetone (1:1, 35 mL) at 0 °C was added a solution of N-methyl morpholine N-oxide/water (50% w/v) (12 mL) and OsO<sub>4</sub> (22.4 mg, 0.168 mmol). The reaction mixture was stirred at rt for 12 h and then concentrated. The residue was pipetted directly on to a silica gel column using a small amount of CH<sub>3</sub>OH in three portions. Impurities were eluted with ether and the product was eluted with 90% EtOAc/Hexane. Pure fractions were combined

and concentrated to afford diol 15 (9.02 g, 92%): Rf (50% EtOAc/hexane) = 0.32;  $[\alpha]_D^{25} = -76.20$  (c = 0.80, CH<sub>2</sub>Cl<sub>2</sub>); IR (thin film, cm<sup>-1</sup>) 3339, 2925, 2855, 1741, 1455, 1378, 1140, 1240, 1046, 1023, 994; <sup>1</sup>H NMR (600 MHz, CDCl<sub>3</sub>) δ 5.36 (d, J = 1.2 Hz, 1H), 4.91 (s, 1H), 4.81 (dd, J = 9.6, 9.6 Hz, 1H), 4.14 (dd, J = 7.2, 5.4 Hz, 1H), 4.05 (d, J = 5.4 Hz, 1H), 3.93 (dd, J = 3.0, 1.8 Hz, 1H), 3.79-3.74 (m, 2H), 3.65-3.60 (m, 2H), 3.47 (dd, J = 10.2, 7.2 Hz, 1H), 3.38 (ddd, J = 9.6, 6.6, 6.6 Hz, 1H), 2.86 (s, br, 2H), 2.09 (s, 3H), 1.55-1.52 (m, 2H), 1.50 (s, 3H), 1.30 (s, 3H), 1.26-1.23 (m, 18H), 1.24 (d, J = 6.6 Hz, 3H), 1.17 (d, J = 6.0 Hz, 3H), 0.85 (t, J = 7.2 Hz, 3H); <sup>13</sup>C NMR (150 MHz, CDCl<sub>3</sub>) δ 171.8, 109.4, 98.1, 96.8, 78.4, 77.5, 76.2, 75.1, 71.2, 70.0, 67.7, 66.3, 63.8, 31.9, 29.6, 29.6, 29.5, 29.4, 29.3, 27.9, 26.3, 26.1, 22.6, 21.0, 18.0, 17.3, 14.1; HRMS (ESI) calcd for [C<sub>29</sub>H<sub>52</sub>O<sub>10</sub> + Na]<sup>+</sup>: 583.3453, Found: 583.3456.

**(16):**

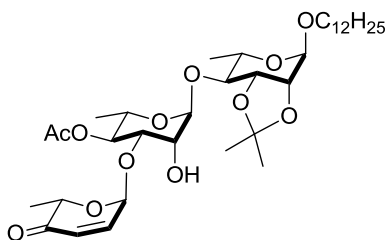

To a solution of diol 15 (7.80 g, 13.9 mmol) in methanol (14 mL) was added dibutyl tin oxide (3.81 g, 15.3 mmol). The solution was heated to reflux until the tin oxide dissolved. The solvent was then removed under vacuum. The residue was dissolved in dry CH<sub>2</sub>Cl<sub>2</sub> (28 mL). To the solution was added Boc-pyranone (3.50 g, 15.3 mmol), Pd<sub>2</sub>(dba)<sub>3</sub>•CHCl<sub>3</sub> (70 mg, 67.6 μmol) and PPh<sub>3</sub> (70 mg, 270 μmol) at 0 °C under argon

atmosphere. After stirring for 2 h from 0 °C to room temperature, the reaction mixture was quenched with 50 mL of saturated NaHCO<sub>3</sub>, extracted (3 x 100 mL) with Et<sub>2</sub>O, dried (Na<sub>2</sub>SO<sub>4</sub>), and concentrated under reduced pressure. The crude product was purified using silica gel flash chromatography eluting with 5~20% EtOAc/Hexane to give pyranone 16 (7.08 g, 76%): R<sub>f</sub> (50% EtOAc/hexane) = 0.54; [α]<sup>25</sup><sub>D</sub> = - 54.80 (c = 0.60, CH<sub>2</sub>Cl<sub>2</sub>); IR (thin film, cm<sup>-1</sup>) 3474, 2925, 2855, 1747, 1702, 1456, 1376, 1225, 1087, 1043, 993; <sup>1</sup>H NMR (600 MHz, CDCl<sub>3</sub>) δ 6.67 (dd, J = 10.2, 3.6 Hz, 1H), 6.08 (d, J = 10.2 Hz, 1H), 5.39 (d, J = 1.8 Hz, 1H), 5.31 (d, J = 3.0 Hz, 1H), 5.08 (dd, J = 9.6, 9.6 Hz, 1H), 4.93 (s, 1H), 4.58 (dd, J = 13.8, 6.6 Hz, 1H), 4.17 (dd, J = 7.2, 5.4 Hz, 1H), 4.07 (m, 2H), 4.00 (dd, J = 9.6, 3.6 Hz, 1H), 3.83-3.79 (m, 1H), 3.70-3.63 (m, 2H), 3.51 (dd, J = 9.6, 7.2 Hz, 1H), 3.40 (ddd, J = 9.6, 6.6, 6.6 Hz, 1H), 2.07 (s, 3H), 1.57-1.54 (m, 2H), 1.51 (s, 3H), 1.37 (d, J = 6.6 Hz, 3H), 1.33-1.24 (m, 18H), 1.30 (s, 3H), 1.27 (d, J = 6.0 Hz, 3H), 1.17 (d, J = 6.6 Hz, 3H), 0.85 (t, J = 7.2 Hz, 3H); <sup>13</sup>C NMR (150 MHz, CDCl<sub>3</sub>) δ 196.1, 169.8, 142.2, 127.6, 109.5, 98.1, 96.9, 94.7, 78.4, 77.9, 77.5, 76.3, 72.8, 71.2, 70.8, 67.8, 66.7, 63.8, 31.9, 29.63, 29.60, 29.5, 29.41, 29.39, 29.3, 27.9, 26.4, 26.1, 22.6, 20.9, 18.0, 17.4, 15.2, 14.1; HRMS (ESI) calcd for [C<sub>35</sub>H<sub>58</sub>O<sub>12</sub> + Na]<sup>+</sup>: 693.3820, Found: 693.3824.

(17):

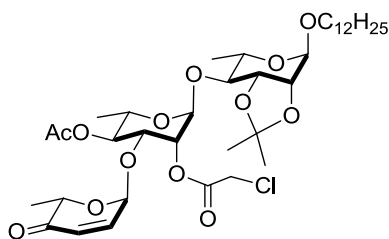

S13

To a solution of the alcohol 16 (6.71 g, 10.0 mmol) in pyridine (30 mL) was added chloroacetic anhydride (5.13 g, 30 mmol) and a catalytic amount of 4-dimethylaminopyridine (30 mg). After stirring for 3 h, the mixture was diluted in ether, washed with saturated  $\text{CuSO}_4$  solution (3 x 60 mL) and the solvent was evaporated. The crude product was purified by silica gel flash chromatography eluting with 5~15% EtOAc/Hexane to give chloro ester 17 (7.23 g, 97%) as a colorless oil:  $R_f$  (30% EtOAc/hexane) = 0.40;  $[\alpha]_D^{25} = -22.53$  (c = 1.50,  $\text{CH}_2\text{Cl}_2$ ); IR (thin film,  $\text{cm}^{-1}$ ) 2928, 2855, 1751, 1702, 1376, 1225, 1138, 1086, 1044, 1004;  $^1\text{H}$  NMR (600 MHz,  $\text{CDCl}_3$ )  $\delta$  6.58 (dd, J = 10.2, 3.6 Hz, 1H), 6.03 (d, J = 10.2 Hz, 1H), 5.38 (dd, J = 3.6, 1.8 Hz, 1H), 5.27 (d, J = 1.8 Hz, 1H), 5.25 (d, J = 3.6 Hz, 1H), 5.01 (dd, J = 9.6, 9.6 Hz, 1H), 4.92 (s, J = 1H), 4.51 (q, J = 6.6 Hz, 1H), 4.17 (dd, J = 7.2, 6.0 Hz, 1H), 4.13 (dd, J = 10.2, 3.6 Hz), 4.12 (s, 2H), 4.08 (d, J = 6.0 Hz, 1H), 3.84-3.79 (m, 1H), 3.72-3.67 (m, 1H), 3.65 (ddd, J = 9.6, 6.6, 6.6 Hz, 1H), 3.45 (dd, J = 9.6, 7.2 Hz, 1H), 3.40 (ddd, J = 9.6, 6.6, 6.6 Hz), 2.08 (s, 3H), 1.58-1.53 (m, 2H), 1.49 (s, 3H), 1.35 (d, J = 7.2 Hz, 3H), 1.32-1.23 (m, 18H), 1.30 (s, 3H), 1.27 (d, J = 6.6 Hz, 3H), 1.18 (d, J = 6.6 Hz, 3H), 0.85 (t, J = 7.2 Hz);  $^{13}\text{C}$  NMR (150 MHz,  $\text{CDCl}_3$ )  $\delta$  196.2, 169.6, 166.7, 141.6, 127.6, 109.5, 96.9, 95.8, 95.2, 78.1, 77.9, 76.2, 75.1, 73.3, 72.8, 70.7, 67.8, 67.1, 63.6, 40.8, 31.9, 29.6, 29.6, 29.5, 29.4, 29.3, 27.9, 26.3, 26.1, 22.6, 20.8, 18.0, 17.4, 14.9, 14.1; HRMS (ESI) calcd for  $[\text{C}_{37}\text{H}_{59}\text{ClO}_{13} + \text{Na}]^+$ : 769.3536, Found: 769.3541.

(G):

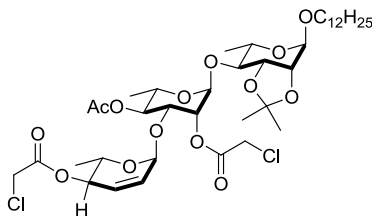

77% as a gummy solid:  $R_f$  (30% EtOAc/hexane) = 0.46;  $[\alpha]_D^{25} = -52.28$  ( $c = 0.75$ ,  $\text{CH}_2\text{Cl}_2$ ); IR (thin film,  $\text{cm}^{-1}$ ) 2925, 2855, 1750, 1379, 1224, 1085, 1047, 997;  $^1\text{H}$  NMR (600 MHz,  $\text{CDCl}_3$ )  $\delta$  5.82 (d,  $J = 10.2$  Hz, 1H), 5.64 (ddd,  $J = 10.8, 2.4, 2.4$  Hz, 1H), 5.33 (dd,  $J = 3.0, 1.8$  Hz, 1H), 5.27 (d,  $J = 1.8$  Hz, 1H), 5.06-5.05 (m, 1H), 5.02 (brs, 1H), 5.00 (dd,  $J = 9.6, 9.6$  Hz, 1H), 4.92 (s, 1H), 4.20 (d,  $J = 15.0$  Hz, 1H), 4.17 (d,  $J = 15.0$  Hz, 1H), 4.16 (m, 1H), 4.09 (d,  $J = 15.0$  Hz, 1H), 4.08 (d,  $J = 5.4$  Hz, 1H), 4.06 (d,  $J = 15.0$  Hz, 1H), 4.05 (d,  $J = 15.0$  Hz, 1H), 4.04 (dd,  $J = 10.2, 3.6$  Hz, 1H), 3.89-3.84 (m, 1H), 3.82-3.77 (m, 1H), 3.72-3.63 (m, 2H), 3.46 (dd,  $J = 9.6, 7.2$  Hz, 1H), 3.40 (ddd,  $J = 9.6, 6.6, 6.6$  Hz, 1H), 2.06 (s, 3H), 1.57-1.55 (m, 2H), 1.49 (s, 3H), 1.30 (s, 3H), 1.34-1.24 (m, 18H), 1.27 (d,  $J = 6.0$  Hz, 3H), 1.22 (d,  $J = 6.6$  Hz, 3H), 1.17 (d,  $J = 6.0$  Hz, 3H), 0.86 (t,  $J = 7.2$  Hz, 3H);  $^{13}\text{C}$  NMR (150 MHz,  $\text{CDCl}_3$ )  $\delta$  169.6, 167.0, 166.7, 129.5, 127.3, 109.5, 96.9, 96.6, 95.8, 78.0, 77.9, 76.2, 75.0, 73.9, 72.7, 72.4, 67.8, 67.1, 65.0, 63.6, 41.0, 40.8, 31.9, 29.64, 29.61, 29.5, 29.4, 29.3, 27.9, 26.3, 26.1, 22.6, 20.8, 18.0, 17.7, 17.4, 14.1; HRMS (ESI) calcd for  $[\text{C}_{39}\text{H}_{62}\text{Cl}_2\text{O}_{14} + \text{Na}]^+$ : 847.3409, Found: 847.3418.

(18):

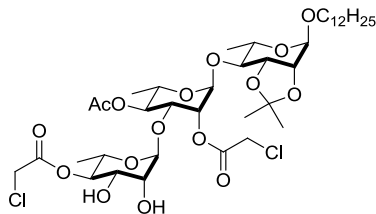

86% as a gummy solid:  $R_f$  (50% EtOAc/hexane) = 0.28;  $[\alpha]_D^{25} = -65.26$  ( $c = 0.75$ ,  $\text{CH}_2\text{Cl}_2$ ); IR (thin film,  $\text{cm}^{-1}$ ) 3481, 2925, 2855, 1765, 1736, 1379, 1240, 1052, 1033;  $^1\text{H}$  NMR (600 MHz,  $\text{CDCl}_3$ )  $\delta$  5.28-5.27 (m, 2H), 5.02 (dd,  $J = 9.6, 9.6$  Hz, 1H), 4.92 (s, 1H), 4.90 (s, 1H), 4.85 (dd,  $J = 9.6, 9.6$  Hz, 1H), 4.18 (d,  $J = 15.0$  Hz, 1H), 4.17 (m, 1H), 4.17 (d,  $J = 15.0$  Hz, 1H), 4.14 (d,  $J = 15.0$  Hz, 1H), 4.13 (d,  $J = 15.0$  Hz, 1H), 4.10 (d,  $J = 15.0$  Hz, 1H), 4.08 (d,  $J = 6.0$  Hz, 1H), 4.06 (dd,  $J = 10.2, 3.6$  Hz, 1H), 3.86-3.82 (m, 1H), 3.80-3.76 (m, 1H), 3.70-3.63 (m, 2H), 3.45 (dd,  $J = 9.6, 7.2$  Hz, 1H), 3.40 (ddd,  $J = 9.6, 6.6, 6.6$  Hz, 1H), 2.75 (d,  $J = 6.6$  Hz, 1H), 2.65 (d,  $J = 4.2$  Hz, 1H), 2.07 (s, 3H), 1.58-1.54 (m, 2H), 1.50 (s, 3H), 1.30 (s, 3H), 1.27-1.24 (m, 18H), 1.26 (d,  $J = 6.6$  Hz, 3H), 1.19 (d,  $J = 6.6$  Hz, 3H), 1.17 (d,  $J = 6.0$  Hz, 3H), 0.86 (t,  $J = 7.2$  Hz, 3H);  $^{13}\text{C}$  NMR (150 MHz,  $\text{CDCl}_3$ )  $\delta$  170.0, 168.1, 166.7, 109.6, 101.3, 96.8, 95.6, 78.1, 77.9, 76.5, 76.2, 74.4, 73.2, 72.8, 71.1, 69.4, 67.8, 67.0, 66.4, 63.6, 40.8, 40.7, 31.9, 29.62, 29.61, 29.5, 29.4, 29.3, 27.9, 26.3, 26.1, 22.6, 20.9, 18.0, 17.31, 17.29, 14.1; HRMS (ESI) calcd for  $[\text{C}_{39}\text{H}_{64}\text{Cl}_2\text{O}_{16} + \text{Na}]^+$ : 881.3464, Found: 881.3475.



**(H):**

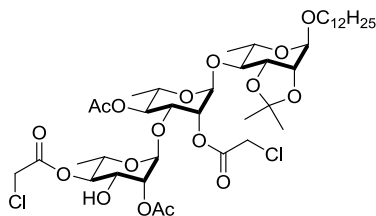

91% as a gummy solid:  $R_f$  (50% EtOAc/hexane) = 0.52;  $[\alpha]_D^{25} = -40.36$  ( $c = 1.10$ ,  $\text{CH}_2\text{Cl}_2$ ); IR (thin film,  $\text{cm}^{-1}$ ) 3488, 2927, 2855, 1749, 1377, 1232, 1137, 1087, 1043, 989;  $^1\text{H}$  NMR (600 MHz,  $\text{CDCl}_3$ )  $\delta$  5.26 (d,  $J = 1.8$  Hz, 1H), 5.24 (dd,  $J = 3.6, 2.4$  Hz, 1H), 5.04 (dd,  $J = 10.2, 9.6$  Hz, 1H), 4.925 (s, 1H), 4.915 (s, 1H), 4.88 (dd,  $J = 9.6, 9.6$  Hz, 1H), 4.84 (dd,  $J = 3.6, 1.8$  Hz, 1H), 4.18 (d,  $J = 15.0$  Hz, 1H), 4.14 (d,  $J = 14.4$  Hz, 1H), 4.13 (m, 2H), 4.07 (d,  $J = 5.4$  Hz, 1H), 4.02 (dd,  $J = 10.2, 3.0$  Hz, 1H), 3.90-3.84 (m, 2H), 3.79-3.74 (m, 1H), 3.68-3.62 (m, 2H), 3.44 (dd,  $J = 9.6, 7.2$  Hz, 1H), 3.41 (ddd,  $J = 9.6, 6.6, 6.6$  Hz, 1H), 2.13 (s, 3H), 2.12 (s, 3H), 2.01 (d,  $J = 9.0$  Hz, 1H), 1.58-1.53 (m, 2H), 1.49 (s, 3H), 1.30 (s, 3H), 1.28-1.24 (m, 18H), 1.25 (d,  $J = 6.0$  Hz, 3H), 1.20 (d,  $J = 6.0$  Hz, 3H), 1.17 (d,  $J = 6.6$  Hz, 3H), 0.86 (t,  $J = 7.2$  Hz, 3H);  $^{13}\text{C}$  NMR (150 MHz,  $\text{CDCl}_3$ )  $\delta$  170.25, 170.20, 167.7, 166.8, 109.5, 99.0, 96.8, 95.7, 78.1, 77.9, 76.2, 76.0, 74.8, 73.2, 72.8, 72.2, 67.8, 67.7, 67.2, 66.5, 63.6, 40.8, 40.7, 31.9, 29.62, 29.60, 29.5, 29.4, 29.3, 27.9, 26.3, 26.1, 22.6, 20.9, 20.8, 18.0, 17.3, 17.2, 14.1; HRMS (ESI) calcd for  $[\text{C}_{41}\text{H}_{66}\text{Cl}_2\text{O}_{17} + \text{Na}]^+$ : 923.3569, Found: 923.3582.

(I):

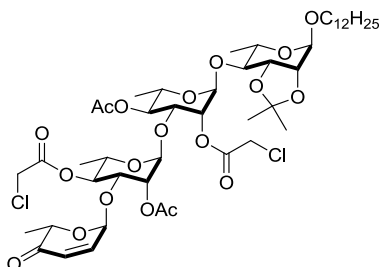

83% as a gummy solid:  $R_f$  (30% EtOAc/hexane) = 0.38;  $[\alpha]_D^{25} = -38.52$  ( $c = 1.20$ ,  $\text{CH}_2\text{Cl}_2$ ); IR (thin film,  $\text{cm}^{-1}$ ) 2927, 2856, 1747, 1703, 1376, 1229, 1137, 1083, 1041, 1008;  $^1\text{H}$  NMR (600 MHz,  $\text{CDCl}_3$ )  $\delta$  6.68 (dd,  $J = 10.2, 3.6$  Hz, 1H), 6.03 (d,  $J = 10.2$  Hz, 1H), 5.30 (dd,  $J = 3.0, 1.8$  Hz, 1H), 5.28 (d,  $J = 1.8$  Hz, 1H), 5.25 (d,  $J = 3.0$  Hz, 1H), 5.08-5.03 (m, 3H), 4.92 (s, 1H), 4.88 (d,  $J = 1.8$  Hz, 1H), 4.35 (ddd,  $J = 7.2, 7.2, 6.6$  Hz, 1H), 4.22 (d,  $J = 15.0$  Hz, 1H), 4.17 (d,  $J = 15.0$  Hz, 1H), 4.16 (dd,  $J = 6.0, 5.4$  Hz, 1H), 4.07 (d,  $J = 5.4$  Hz, 1H), 4.05-4.02 (m, 3H), 4.02 (dd,  $J = 9.6, 3.6$  Hz, 1H), 3.93-3.88 (m, 1H), 3.81-3.76 (m, 1H), 3.69-3.62 (m, 2H), 3.45 (dd,  $J = 9.6, 7.2$  Hz, 1H), 3.42 (ddd,  $J = 9.6, 6.6, 6.6$  Hz, 1H), 2.12 (s, 3H), 2.09 (s, 3H), 1.58-1.53 (m, 2H), 1.50 (s, 3H), 1.32 (d,  $J = 7.2$  Hz, 3H), 1.30 (s, 3H), 1.27-1.24 (m, 18H), 1.25 (d,  $J = 6.0$  Hz, 3H), 1.20 (d,  $J = 6.0$  Hz, 1H), 1.18 (d,  $J = 6.0$  Hz, 6H), 0.85 (t,  $J = 7.2$  Hz, 3H);  $^{13}\text{C}$  NMR (150 MHz,  $\text{CDCl}_3$ )  $\delta$  196.3, 170.3, 170.1, 166.9, 166.4, 141.9, 127.6, 109.5, 99.0, 96.8, 77.9, 76.2, 75.1, 75.0, 74.0, 73.1, 72.2, 71.9, 70.6, 67.8, 67.2, 67.1, 63.6, 40.8, 40.5, 31.9, 29.62, 29.60, 29.5, 29.4, 29.3, 27.9, 26.3, 26.1, 22.6, 20.9, 20.7,

18.0, 17.4, 17.3, 14.7, 14.1; HRMS (ESI) calcd for  $[C_{47}H_{72}Cl_2O_{19} + Na]^+$ : 1033.3937,

Found: 1033.3947.

**(20):**

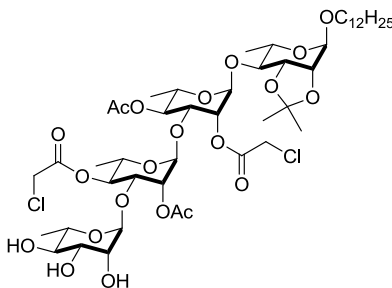

76% as a gummy solid:  $R_f$  (100% EtOAc/hexane) = 0.38;  $[\alpha]_D^{25} = -48.54$  ( $c = 1.10$ , MeOH); IR (thin film,  $cm^{-1}$ ) 3428, 2926, 2855, 1748, 1230, 1138, 1087, 1046, 988;  $^1H$  NMR (600 MHz,  $CDCl_3$ )  $\delta$  5.274-5.267 (m, 2H), 5.05 (dd,  $J = 4.8, 4.2$  Hz, 1H), 5.02 (dd,  $J = 4.8, 4.2$  Hz, 1H), 4.93-4.92 (m, 2H), 4.88 (s, 1H), 4.83 (s, 1H), 4.23 (d,  $J = 15.0$  Hz, 1H), 4.17 (d,  $J = 15.0$  Hz, 1H), 4.15 (dd,  $J = 6.6, 6.0$  Hz, 1H), 4.07 (d,  $J = 5.4$  Hz, 1H), 4.06 (s, 2H), 4.01 (dd,  $J = 10.2, 3.0$  Hz, 1H), 3.95 (dd,  $J = 10.2, 3.0$  Hz, 1H), 3.88-3.84 (m, 1H), 3.79-3.75 (m, 2H), 3.68-3.62 (m, 2H), 3.61 (dd,  $J = 9.6, 3.0$  Hz, 1H), 3.52-3.47 (m, 1H), 3.45 (dd,  $J = 9.6, 7.2$  Hz, 1H), 3.42-3.38 (m, 2H), 2.12 (s, 3H), 2.11 (s, 3H), 1.58-1.53 (m, 2H), 1.49 (s, 3H), 1.30 (s, 3H), 1.32-1.24 (m, 18H), 1.25 (d,  $J = 6.6$  Hz, 3H), 1.21 (d,  $J = 6.0$  Hz, 3H), 1.18 (d,  $J = 6.0$  Hz, 3H), 1.17 (d,  $J = 6.0$  Hz, 3H), 0.86 (t,  $J = 7.2$  Hz, 3H);  $^{13}C$  NMR (150 MHz,  $CDCl_3$ )  $\delta$  170.4, 170.3, 166.9, 166.7, 109.6, 102.0, 98.9, 96.8, 95.6, 78.0, 77.9, 76.2, 75.2, 74.6, 74.2, 73.1, 72.9, 72.2, 71.9, 71.4, 70.8, 68.9, 67.8, 67.1, 67.0, 63.6, 40.8, 40.6, 31.9, 29.63, 29.61,

29.5, 29.4, 29.3, 27.9, 26.3, 26.1, 22.7, 20.9, 20.8, 18.0, 17.4, 17.3, 17.1, 14.1; HRMS

(ESI) calcd for  $[C_{47}H_{76}Cl_2O_{21} + Na]^+$ : 1069.4148, Found: 1069.4164.

**(21):**

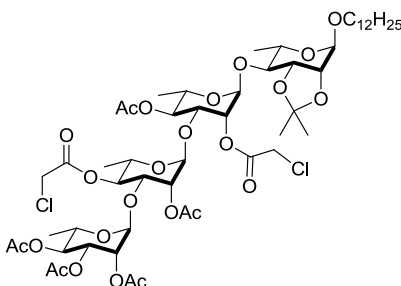

95.0 % as a colorless liquid:  $R_f$  (33% EtOAc/Hexane) = 0.29;  $[\alpha]_D^{25} = -35.73$  ( $c = 1.75$ ,  $CHCl_3$ ); IR (thin film,  $cm^{-1}$ ) 2926, 2855, 1748, 1371, 1223, 1139, 1087, 1046, 989;  $^1H$  NMR (600 MHz,  $CDCl_3$ )  $\delta$  5.29 (s, 1H), 5.28 (dd,  $J = 4.8, 1.8$  Hz, 1H), 5.12 (dd,  $J = 10.2, 3.6$  Hz, 1H), 5.10 (dd,  $J = 10.2, 9.6$  Hz, 1H), 5.05 (dd,  $J = 10.2, 9.6$  Hz, 1H), 5.02 (dd,  $J = 10.2, 10.2$  Hz, 1H), 5.00 (dd,  $J = 3.0, 1.8$  Hz, 1H), 4.96 (dd,  $J = 3.6, 1.8$  Hz, 1H), 4.93 (s, 1H), 4.88 (d,  $J = 1.8$  Hz, 1H), 4.84 (d,  $J = 1.8$  Hz, 1H), 4.26 (d,  $J = 14.4$  Hz, 1H), 4.19 (d,  $J = 14.4$  Hz, 1H), 4.17 (dd,  $J = 10.8, 6.0$  Hz, 1H), 4.15 (d,  $J = 15$  Hz, 1H), 4.14 (d,  $J = 15$  Hz, 1H), 4.09 (d,  $J = 6.0$  Hz, 1H), 4.03 (dd,  $J = 9.6, 3.0$  Hz, 1H), 3.97 (dd,  $J = 9.6, 3.0$  Hz, 1H), 3.87 (dq,  $J = 10.2, 6.6$  Hz, 1H), 3.79 (dq,  $J = 9.6, 6.0$  Hz, 1H), 3.78 (dq,  $J = 9.6, 6.0$  Hz, 1H), 3.68 (dq,  $J = 8.6, 6.0$  Hz, 1H), 3.66 (ddd,  $J = 9.6, 7.2, 6.6$  Hz, 1H), 3.47 (dd,  $J = 10.2, 7.2$  Hz, 1H), 3.41 (ddd,  $J = 9.6, 6.6, 6.6$  Hz, 1H), 2.18 (s, 3H), 2.12 (s, 6H), 2.03 (s, 3H), 1.97 (s, 3H), 1.60 – 1.55 (m, 2H), 1.51 (s, 3H), 1.32 (s, 3H), 1.34 – 1.25 (m, 18H), 1.26 (d,  $J = 6.0$  Hz, 3H), 1.21 (d,  $J =$

6.0 Hz, 3H), 1.19 (d,  $J = 6.6$  Hz, 3H), 1.17 (d,  $J = 6.6$  Hz, 3H), 0.88 (dd,  $J = 7.2, 6.6$  Hz, 3H);  $^{13}\text{C}$  NMR (150 MHz,  $\text{CDCl}_3$ )  $\delta$  170.4, 170.2, 170.0 (2C), 169.7, 166.9, 166.8, 109.6, 99.1, 98.8, 96.8, 95.6, 78.0, 77.9, 76.2, 74.9, 74.3, 73.8, 73.1, 72.3, 71.4, 70.8, 70.1, 68.5, 67.8, 67.3 (2C), 67.1, 63.6, 40.7 (2C), 31.9, 29.6 (3C), 29.5, 29.4 (2C), 29.3, 27.9, 26.3, 26.1, 22.7, 20.9, 20.8 (2C), 20.7 (2C), 18.0, 17.3 (2C), 17.1, 14.1; HRMS (ESI): calcd. for  $[\text{C}_{53}\text{H}_{82}\text{Cl}_2\text{O}_{24} + \text{Na}]^+$ : 1195.44653, Found: 1195.44626.

**(J):**

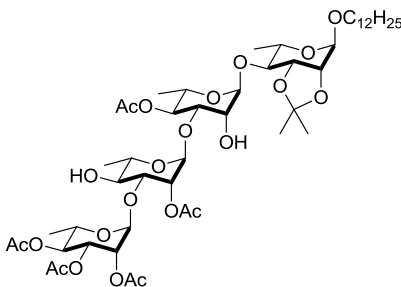

96% as a white gummy solid:  $R_f$  (50% EtOAc/hexane) = 0.43;  $[\alpha]_D^{25} = -48.07$  ( $c = 1.68$ ,  $\text{CHCl}_3$ ); IR (thin film,  $\text{cm}^{-1}$ ) 3447 (brs), 2926, 2855, 1745, 1372, 1222, 1138, 1082, 1045, 991;  $^1\text{H}$  NMR (600 MHz,  $\text{CDCl}_3$ )  $\delta$  5.37 (d,  $J = 1.2$  Hz, 1H), 5.32 (dd,  $J = 3.0, 1.2$  Hz, 1H), 5.17 (dd,  $J = 10.2, 3.6$  Hz, 1H), 5.08 (dd,  $J = 10.2, 9.6$  Hz, 1H), 5.03 (dd,  $J = 10.2, 9.6$  Hz, 1H), 4.97 (dd,  $J = 3.6, 1.8$  Hz, 1H), 4.96 (d,  $J = 1.8$  Hz, 1H), 4.93 (s, 1H), 4.87 (d,  $J = 1.8$  Hz, 1H), 4.14 (dd,  $J = 7.2, 5.4$  Hz, 1H), 4.08 (d,  $J = 5.4$  Hz, 1H), 3.98 (dd,  $J = 2.4, 1.8$  Hz, 1H), 3.91 (dd,  $J = 9.6, 3.6$  Hz, 1H), 3.83 (dd,  $J = 9.6, 3.0$  Hz, 1H), 3.81-3.75 (m, 3H), 3.66 (ddd,  $J = 9.6, 6.6, 6.0$  Hz, 1H), 3.65 (dq,  $J = 9.6, 6.0$  Hz, 1H), 3.62 (dd,  $J = 9.6, 9.0$  Hz, 1H), 3.49 (dd,  $J = 10.2, 7.2$  Hz, 1H),

3.41 (ddd,  $J = 9.6, 6.6, 6.6$  Hz, 1H), 2.96 (s, 1H) 2.82 (s, 1H), 2.16 (s, 3H), 2.14 (s, 3H), 2.12 (s, 3H), 2.04 (s, 3H), 1.98 (s, 3H), 1.60 – 1.55 (m, 2H), 1.52 (s, 3H), 1.31 (s, 3H), 1.34 – 1.25 (m, 18H), 1.34 (d,  $J = 6.0$  Hz, 3H), 1.26 (d,  $J = 6.0$  Hz, 3H), 1.18 (d,  $J = 6.6$  Hz, 3H), 1.17 (d,  $J = 6.0$  Hz, 3H), 0.87 (dd,  $J = 7.2, 7.2$  Hz, 3H);  $^{13}\text{C}$  NMR (150 MHz,  $\text{CDCl}_3$ )  $\delta$  171.0, 170.6 (2C), 170.4, 170.1, 109.7, 99.7, 99.5, 98.3, 97.1, 78.7, 78.5, 77.9, 76.5, 72.4, 72.2, 72.1, 71.3, 70.9, 70.0, 69.4, 69.2, 68.0, 67.4, 67.1, 64.0, 33.1, 29.8 (3C), 29.7, 29.6 (2C), 29.5, 28.1, 26.6, 26.3, 22.9, 21.1(2C), 21.0 (3C), 18.2, 17.9, 17.6, 17.3, 14.3; HRMS (ESI): calcd. for  $[\text{C}_{49}\text{H}_{80}\text{O}_{22} + \text{Na}]^+$ : 1043.50334, Found: 1043.50367.

**Cleistroside-New2 (10):**

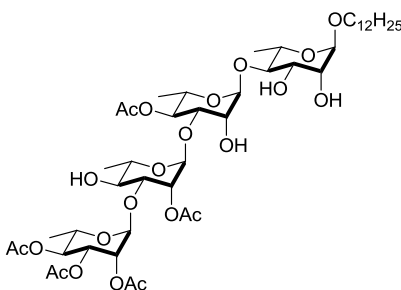

97.0% as a gummy solid:  $R_f$  (20% MeOH/EtOAc) = 0.77;  $[\alpha]^{25}_{\text{D}} = -63.92$  ( $c = 0.96$ ,  $\text{CHCl}_3$ ); IR (thin film,  $\text{cm}^{-1}$ ) 3489 (brs), 2924, 2852, 1747, 1372, 1229, 1138, 1046, 990;  $^1\text{H}$  NMR (600 MHz,  $\text{CD}_3\text{OD}$ )  $\delta$  5.36 (dd,  $J = 3.6, 1.8$  Hz, 1H), 5.23 (d,  $J = 1.8$  Hz, 1H), 5.14 (dd,  $J = 10.2, 3.6$  Hz, 1H), 5.11 (dd,  $J = 9.6, 9.6$  Hz, 1H), 5.08 (d,  $J = 1.8$  Hz, 1H), 5.05 (dd,  $J = 3.6, 1.8$  Hz, 1H), 4.99 (dd,  $J = 10.2, 9.6$  Hz, 1H), 4.84 (d,  $J = 1.8$  Hz, 1H), 4.64 (d,  $J = 1.8$  Hz, 1H), 4.08 (dd,  $J = 3.0, 1.8$  Hz, 1H), 4.05 (dd,  $J = 9.0, 3.0$  Hz, 1H), 3.91-3.86 (m, 3H), 3.86 (dq,  $J = 10.2, 6.6$  Hz, 1H), 3.76 (dd,  $J = 9.6,$

3.6 Hz, 1H), 3.73 (dd,  $J = 3.6, 1.8$  Hz, 1H), 3.67 (ddd,  $J = 9.6, 6.6, 6.6$  Hz, 1H), 3.64 (dq,  $J = 9.6, 6.0$  Hz, 1H), 3.52 (dd,  $J = 9.6, 8.4$  Hz, 1H), 3.51 (dd,  $J = 9.6, 9.6$  Hz, 1H), 3.40 (ddd,  $J = 10.2, 6.6, 6.0$  Hz, 1H), 2.13 (s, 3H), 2.12 (s, 3H), 2.11 (s, 3H), 2.05 (s, 3H), 1.95 (s, 3H), 1.64 – 1.54 (m, 2H), 1.33 – 1.28 (m, 21H), 1.28 (d,  $J = 6.0$  Hz, 3H), 1.16 (d,  $J = 6.0$  Hz, 3H), 1.15 (d,  $J = 6.0$  Hz, 3H), 0.91 (dd,  $J = 7.2, 6.6$  Hz, 3H);  $^{13}\text{C}$  NMR (150 MHz,  $\text{CD}_3\text{OD}$ )  $\delta$  172.2 (2C), 171.9 (2C), 171.8, 103.2, 101.6, 101.1, 100.9, 81.4, 79.0, 77.5, 74.1, 73.6, 73.5, 73.4, 73.0, 72.3, 72.2, 71.1, 70.9, 70.5, 68.7 (2C), 68.4, 68.2, 33.2, 30.9 (3C), 30.8, 30.7, 30.6 (2C), 27.5, 23.9, 21.2, 21.0, 20.8 (3C), 18.9, 18.0, 17.8, 17.7, 14.6; HRMS (ESI): calcd. for  $[\text{C}_{46}\text{H}_{76}\text{O}_{22} + \text{Na}]^+$ : 1003.47204, Found: 1003.47190.

**(K):**

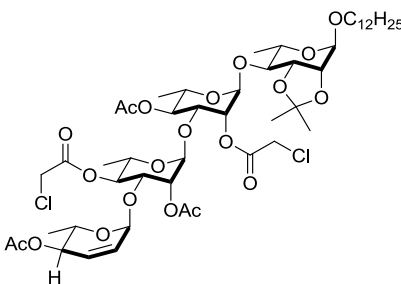

78% as a gummy solid:  $R_f$  (30% EtOAc/hexane) = 0.44;  $[\alpha]_{\text{D}}^{25} = -48.59$  ( $c = 1.10$ ,  $\text{CH}_2\text{Cl}_2$ ); IR (thin film,  $\text{cm}^{-1}$ ) 2926, 2856, 1745, 1375, 1230, 1137, 1085, 1039;  $^1\text{H}$  NMR (600 MHz,  $\text{CDCl}_3$ )  $\delta$  5.80 (d,  $J = 10.2$  Hz, 1H), 5.66 (ddd,  $J = 10.2, 2.4, 2.4$  Hz, 1H), 5.30 (dd,  $J = 3.0, 1.8$  Hz, 1H), 5.28 (d,  $J = 1.2$  Hz, 1H), 5.08-5.01 (m, 4H), 4.99 (dd,  $J = 9.6, 1.2$  Hz, 1H), 4.92 (s, 1H), 4.88 (d,  $J = 1.8$  Hz, 1H), 4.22 (d,  $J = 15.0$  Hz, 1H), 4.17 (d,  $J = 15.0$  Hz, 1H), 4.16 (dd,  $J = 6.0, 5.4$  Hz, 1H), 4.07 (d,  $J = 5.4$  Hz, 1H),

4.03-4.01 (m, 3H), 3.98 (dd,  $J = 10.2, 3.0$  Hz, 1H), 3.91-3.86 (m, 1H), 3.81-3.76 (m, 1H), 3.75-3.71 (m, 1H), 3.69-3.63 (m, 2H), 3.45 (dd,  $J = 9.6, 7.2$  Hz, 1H), 3.42 (ddd,  $J = 10.2, 6.6, 6.6$  Hz, 1H), 2.13 (s, 3H), 2.12 (s, 3H), 2.05 (s, 3H), 1.58-1.54 (m, 2H), 1.50 (s, 3H), 1.30 (s, 3H), 1.29-1.25 (m, 18H), 1.26 (d,  $J = 6.0$  Hz, 3H), 1.19 (d,  $J = 6.0$  Hz, 3H), 1.18 (d,  $J = 6.0$  Hz, 3H), 1.16 (d,  $J = 6.0$  Hz, 6H), 0.86 (t,  $J = 7.2$  Hz, 3H);  $^{13}\text{C}$  NMR (150 MHz,  $\text{CDCl}_3$ )  $\delta$  170.43, 170.39, 170.0, 166.9, 166.5, 130.4, 126.7, 109.5, 98.9, 96.8, 95.6, 77.94, 77.89, 76.2, 74.8, 74.5, 74.2, 73.1, 72.5, 72.2, 70.6, 67.8, 67.2, 67.1, 65.1, 63.6, 31.9, 29.62, 29.60, 29.5, 29.4, 29.3, 27.9, 26.3, 26.1, 22.6, 21.0, 20.9, 20.7, 18.0, 17.52, 17.47, 17.3, 14.1; HRMS (ESI) calcd for  $[\text{C}_{49}\text{H}_{76}\text{Cl}_2\text{O}_{20} + \text{Na}]^+$ : 1077.4199, Found: 1077.4210.

**(19):**

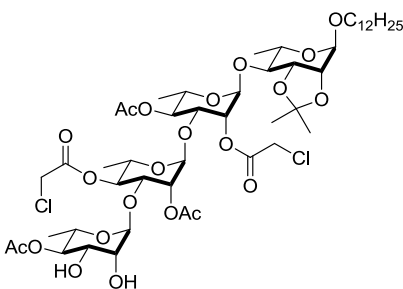

80% as a gummy solid:  $R_f$  (50% EtOAc/hexane) = 0.19;  $[\alpha]_{\text{D}}^{25} = -38.66$  ( $c = 1.50$ , MeOH); IR (thin film,  $\text{cm}^{-1}$ ) 3470, 2926, 2855, 1745, 1376, 1231, 1137, 1085, 1037, 989;  $^1\text{H}$  NMR (600 MHz,  $\text{CDCl}_3$ )  $\delta$  5.27-5.26 (m, 2H), 5.05 (dd,  $J = 9.6, 3.0$  Hz, 1H), 5.04 (dd,  $J = 10.2, 3.0$  Hz, 1H), 4.92 (dd,  $J = 3.0, 1.8$  Hz, 1H), 4.92 (s, 1H), 4.87 (d,  $J = 1.8$  Hz, 1H), 4.75 (dd,  $J = 9.6, 9.6$  Hz, 1H), 4.21 (d,  $J = 15.0$  Hz, 1H), 4.16 (d,  $J =$



15.0 Hz, 1H), 4.15 (dd,  $J = 7.2, 6.0$  Hz, 1H), 4.07 (d,  $J = 5.4$  Hz, 1H), 4.04-4.03 (m, 2H), 4.02 (dd,  $J = 10.2, 3.0$  Hz, 1H), 3.96 (dd,  $J = 10.2, 3.0$  Hz, 1H), 3.89-3.84 (m, 1H), 3.81-3.75 (m, 2H), 3.98 (dd,  $J = 9.6, 3.6$  Hz, 1H), 3.68-3.60 (m, 3H), 3.44 (dd,  $J = 9.6, 7.2$  Hz, 1H), 3.41 (ddd,  $J = 10.2, 6.6, 6.6$  Hz, 1H), 2.91 (brs, 1H), 2.65 (brs, 1H), 2.12 (s, 3H), 2.11 (s, 3H), 2.09 (s, 3H), 1.58-1.53 (m, 2H), 1.49 (s, 3H), 1.30 (s, 3H), 1.34-1.24 (m, 18H), 1.25 (d,  $J = 6.6$  Hz, 3H), 1.18 (d,  $J = 6.0$  Hz, 3H), 1.17 (d,  $J = 6.0$  Hz, 3H), 1.13 (d,  $J = 6.0$  Hz, 3H), 0.85 (t,  $J = 7.2$  Hz, 3H);  $^{13}\text{C}$  NMR (150 MHz,  $\text{CDCl}_3$ )  $\delta$  172.0, 170.2, 170.1, 166.9, 166.6, 109.6, 101.7, 98.8, 96.8, 95.6, 78.0, 77.9, 76.2, 75.0, 74.7, 74.0, 73.1, 72.2, 71.8, 70.8, 70.0, 67.8, 67.1, 67.0, 66.6, 63.6, 40.7, 40.5, 31.9, 29.62, 29.60, 29.5, 29.4, 29.3, 27.9, 26.3, 26.1, 22.6, 21.0, 20.9, 20.7, 18.0, 17.4, 17.3, 17.0, 14.1; HRMS (ESI) calcd for  $[\text{C}_{49}\text{H}_{78}\text{Cl}_2\text{O}_{22} + \text{Na}]^+$ : 1111.4254, Found: 1111.4264.

**(L):**

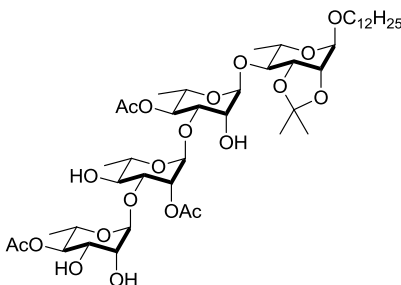

87.0 % as a white gummy solid:  $R_f$  (75% EtOAc/hexane) = 0.20;  $[\alpha]_D^{25} = -54.58$  ( $c = 1.28$ ,  $\text{CHCl}_3$ ); IR (thin film,  $\text{cm}^{-1}$ ) 3454 (brs), 2925, 2855, 1740, 1453, 1374, 1235, 1137, 1078, 1041, 992, 917, 861, 732;  $^1\text{H}$  NMR (600 MHz,  $\text{CDCl}_3$ )  $\delta$  5.35 (d,  $J = 0.6$

Hz, 1H), 5.08 (s, 1H), 5.05 (dd,  $J = 10.2, 9.6$  Hz, 1H), 4.94 (dd,  $J = 3.0, 1.8$  Hz, 1H), 4.93 (s, 1H), 4.85 (d,  $J = 1.2$  Hz, 1H), 4.84 (dd,  $J = 9.6, 9.6$  Hz, 1H), 4.15 (dd,  $J = 7.2, 6.0$  Hz, 1H), 4.14-4.12 (m, 1H), 4.07 (d,  $J = 6.0$  Hz, 1H), 4.04 (dd,  $J = 9.6, 3.0$  Hz, 1H), 4.00 (dd,  $J = 2.4, 1.8$  Hz, 1H), 3.86 (dq,  $J = 9.6, 6.0$  Hz, 1H), 3.81 (dd,  $J = 10.2, 3.6$  Hz, 1H), 3.81 (dd,  $J = 9.6, 3.0$  Hz, 1H), 3.79 (dq,  $J = 9.6, 6.0$  Hz, 1H), 3.69 (dq,  $J = 9.6, 6.0$  Hz, 1H), 3.66 (ddd,  $J = 9.6, 7.2, 6.6$  Hz, 1H), 3.65 (dq,  $J = 10.2, 6.6$  Hz, 1H), 3.57 (dd,  $J = 9.6, 9.0$  Hz, 1H), 3.48 (dd,  $J = 10.2, 7.2$  Hz, 1H), 3.41 (ddd,  $J = 9.6, 6.6, 6.6$  Hz, 1H), 2.16 (s, 3H), 2.12 (s, 3H), 2.11 (s, 3H), 1.60 – 1.55 (m, 2H), 1.52 (s, 3H), 1.32 (s, 3H), 1.33 – 1.25 (m, 24H), 1.18 (d,  $J = 6.6$  Hz, 3H), 1.15 (d,  $J = 6.0$  Hz, 3H), 0.88 (dd,  $J = 7.2, 6.6$  Hz, 3H);  $^{13}\text{C}$  NMR (150 MHz,  $\text{CDCl}_3$ )  $\delta$  171.9, 171.3, 170.7, 109.6, 102.5, 99.5, 98.4, 97.1, 78.8, 78.7, 77.8 (2C), 76.5, 74.7, 72.5, 72.3, 72.1, 71.3, 70.9, 69.8, 69.3, 68.0, 67.2, 67.1, 64.0, 32.1, 29.8 (3C), 29.7.7, 29.6 (2C), 29.5, 28.1, 26.6, 26.3, 22.9, 21.3, 21.1, 21.0, 18.3, 17.9, 17.5, 17.3, 14.3; HRMS (ESI): calcd. for  $[\text{C}_{45}\text{H}_{76}\text{O}_{20} + \text{Na}]^+$ : 959.48222, Found: 959.48279.

**Cleistetroside-New 1 (9):**

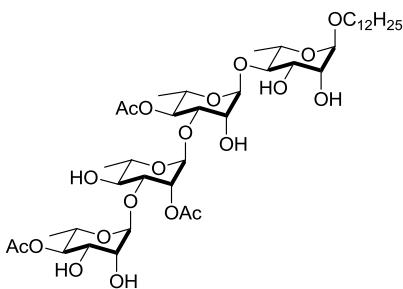

95.0% as a gummy solid:  $R_f$  (17% MeOH/EtOAc) = 0.33;  $[\alpha]_D^{25} = -61.38$  ( $c = 0.75$ ,  $\text{CHCl}_3$ ); IR (thin film,  $\text{cm}^{-1}$ ) 3458 (brs), 2925, 2860, 1742, 1376, 1238, 1135, 1079, 1043, 990;  $^1\text{H}$  NMR (600 MHz,  $\text{CD}_3\text{OD}$ )  $\delta$  5.23 (d,  $J = 1.8$  Hz, 1H), 5.12 (dd,  $J = 10.2, 9.6$  Hz, 1H), 5.01 (dd,  $J = 3.6, 1.8$  Hz, 1H), 5.00 (d,  $J = 1.2$  Hz, 1H), 4.90 (dd,  $J = 10.2, 9.6$  Hz, 1H), 4.83 (d,  $J = 1.8$  Hz, 1H), 4.65 (d,  $J = 1.2$  Hz, 1H), 4.07 (dd,  $J = 3.0, 1.8$  Hz, 1H), 4.01 (dd,  $J = 9.6, 3.0$  Hz, 1H), 3.96 (dd,  $J = 3.6, 1.8$  Hz, 1H), 3.88 (dq,  $J = 9.0, 6.0$  Hz, 1H), 3.87 (dd,  $J = 10.2, 3.0$  Hz, 1H), 3.86 (dq,  $J = 9.0, 6.0$  Hz, 1H), 3.76 (dd,  $J = 9.0, 3.6$  Hz, 1H), 3.73 (dd,  $J = 9.6, 3.0$  Hz, 1H), 3.73 (dd,  $J = 3.6, 1.8$  Hz, 1H), 3.68 (dq,  $J = 10.2, 6.6$  Hz, 1H), 3.67 (ddd,  $J = 9.6, 6.6, 6.6$  Hz, 1H), 3.64 (dq,  $J = 9.6, 6.0$  Hz, 1H), 3.52 (dd,  $J = 9.0, 9.0$  Hz, 1H), 3.46 (dd,  $J = 10.2, 9.6$  Hz, 1H), 3.40 (ddd,  $J = 9.6, 6.6, 6.0$  Hz, 1H), 2.12 (s, 3H), 2.09 (s, 3H), 2.08 (s, 3H), 1.63 – 1.54 (m, 2H), 1.39 – 1.25 (m, 18H), 1.28 (d,  $J = 6.0$  Hz, 6H), 1.14 (d,  $J = 6.0$  Hz, 3H), 1.11 (d,  $J = 6.6$  Hz, 3H), 0.91 (dd,  $J = 7.2, 6.6$  Hz, 3H);  $^{13}\text{C}$  NMR (150 MHz,  $\text{CD}_3\text{OD}$ )  $\delta$  172.7, 172.2, 172.1, 104.1, 103.1, 101.6, 100.9, 81.4, 78.8, 77.8, 75.7, 74.0, 73.9, 73.5, 73.4, 73.0, 72.3 (2C), 70.6, 70.5, 68.7 (2C), 68.4, 68.2, 33.2, 30.9 (3C), 30.8, 30.7, 30.6 (2C), 27.5, 23.9, 21.2 (2C), 21.0, 18.9, 18.1, 17.8 (2C), 14.3; HRMS (ESI): calcd. for  $[\text{C}_{42}\text{H}_{72}\text{O}_{20} + \text{Na}]^+$ : 919.45092, Found: 919.45128.

## Determination of the linkage of the Ac group in Cleistetrosides

The regio- and stereo-chemical structural assignments of all eight oligosaccharides naturally occurring oligosaccharides were made by comparison of the spectral data to

that reported by Seidel and Hu. To establish the regio- and stereo-chemistry of the two new oligosaccharides (9 and 10) a detail NMR analysis was carried out for oligosaccharide 9 (*vide infra*) and the stereochemistry of 10 was determined by analogy. Finally structural confirmation for all ten oligosaccharides (1-10) was obtained by the detailed analysis of oligosaccharides 7 and 9 in combination with knowledge of the synthetic sequence for all ten oligosaccharides (i.e., proof of the routes regio- and stereoselectivity of each branching points).

Examination of the  $^1\text{H}$  NMR spectra of cleistetrosides show similar splitting patterns for the protons of each of the A-D sugar moieties and also for the side chain aliphatic dodecyl groups. Each of sugar moieties contains eight-spin systems. It should be noted that the  $^1\text{H}$  and  $^{13}\text{C}$  NMR spectra does not reveal a greater separation between the carbonyl frequencies nor the methyl hydrogen and carbon frequencies for the acyl groups. Take cleistetroside-New-1 (9) as example:

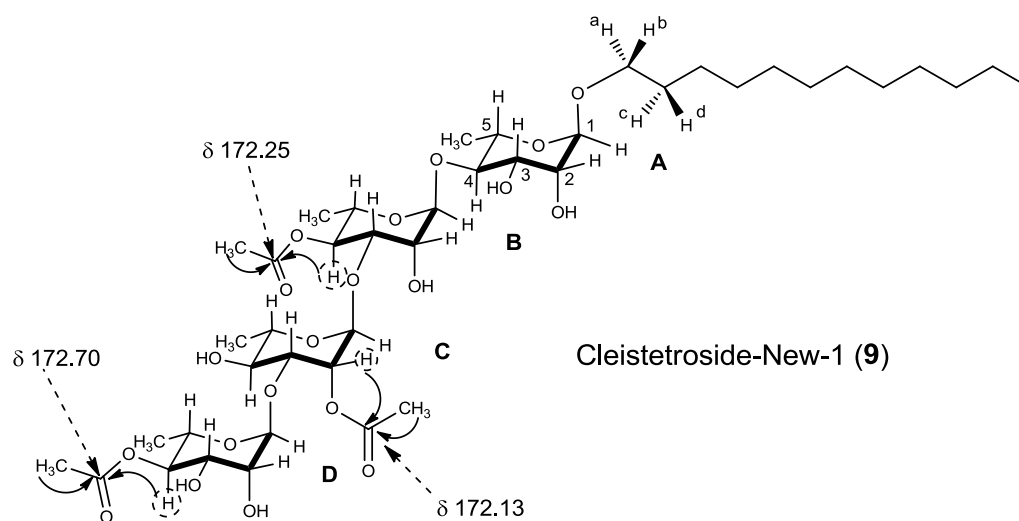

Figure S1. Structure of Cleistetroside-New-1 (9)

The  $^1\text{H}$  NMR spectrum of cleistetroside-New1 (9) shows the presence of three singlets at 2.08, 2.09, and 2.12 ppm which are typical for the methyl of the Acyl groups, as well as the  $^{13}\text{C}$  NMR spectrum displays three peaks at 172.13, 172.25, and 172.70 ppm, which are also characteristic for the carbonyl resonances for Acyl groups. The strategy for determination of the linkage positions of the three Acyl groups based on the following HMBC correlations: B-H4  $\rightarrow$  B-4-CH<sub>3</sub>COO ( $^3J_{\text{HC}}$ ) and B-4-CH<sub>3</sub>COO  $\rightarrow$  B-4-CH<sub>3</sub>COO ( $^2J_{\text{HC}}$ ); C-H2  $\rightarrow$  C-2-CH<sub>3</sub>COO ( $^3J_{\text{HC}}$ ) and C-2-CH<sub>3</sub>COO  $\rightarrow$  C-2-CH<sub>3</sub>COO ( $^2J_{\text{HC}}$ ); D-H4  $\rightarrow$  D-4-CH<sub>3</sub>COO ( $^3J_{\text{HC}}$ ) and D-4-CH<sub>3</sub>COO  $\rightarrow$  D-4-CH<sub>3</sub>COO ( $^2J_{\text{HC}}$ ).

In HMBC, observed three ( $^3J_{\text{HC}}$ ) and two bond ( $^2J_{\text{HC}}$ ) correlations, confirm the positions of the three Ac groups in cleistetroside-new-1. (Figure S2)

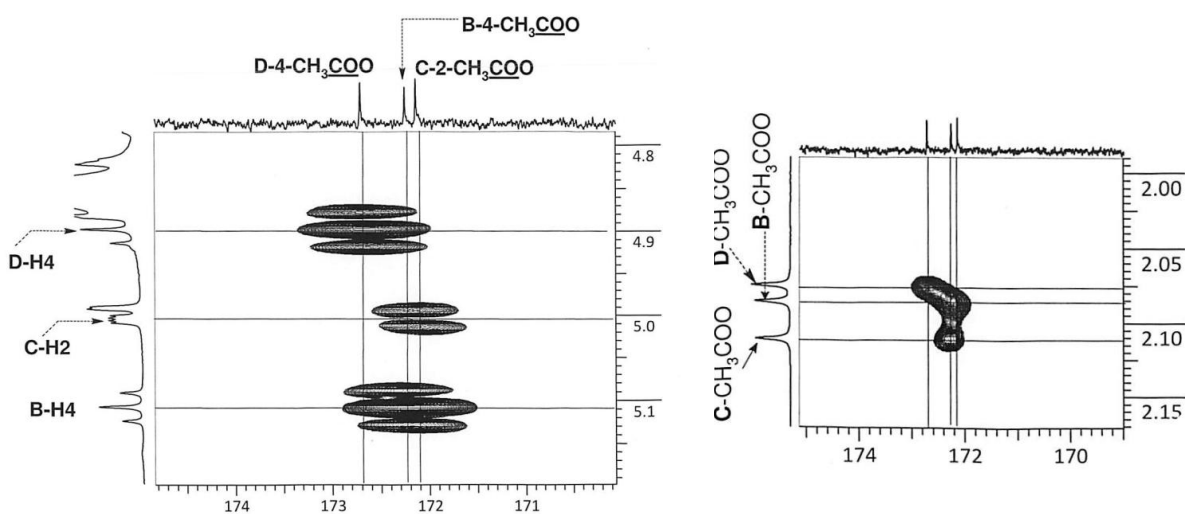

Figure S2. Chemical shifts of the carbonyls in cleistetroside-new-1 (9)

In the  $^1\text{H}$  NMR spectrum of cleistetroside-3 the four acyl methyl's appear at 2.09, 2.13, 2.14, 2.15 ppm, the  $^{13}\text{C}$  NMR spectrum of cleistetroside-3 shows four carbonyl resonances at 172.08, 172.29, 172.35, and 172.39 ppm and four acyl group methyl resonances at 20.95, 20.96, 21.06, and 21.19.

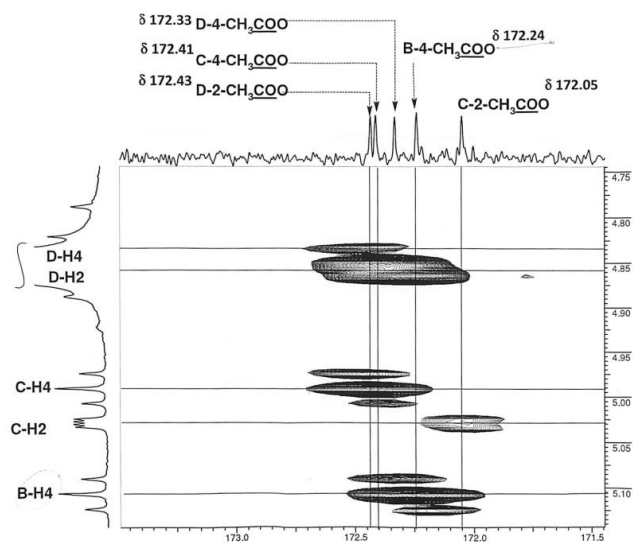

Figure S3. Chemical shifts of the carbonyls in cleistetroside-6 (7)

Whereas the  $^1\text{H}$  NMR spectrum of cleistetroside-6 shows five acyl group methyl resonances at 2.09, 2.12, 2.12, 2.14, and 2.15 ppm. Similarly, whereas the  $^{13}\text{C}$  NMR spectrum of cleistetroside-6 shows five carbonyl resonances at 172.05, 172.24, 172.33, 172.41 and 172.43 and also five acyl methyl resonances at 20.93, 20.94, 21.07, 21.08, and 21.18.

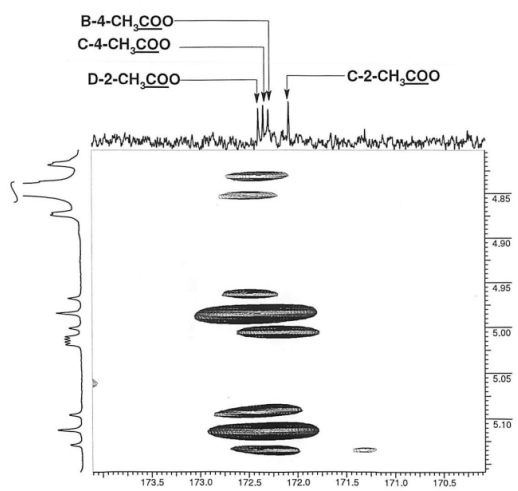

Figure S4. Chemical shifts of the carbonyls in cleistetroside-6 (7)

### Section C: Antibacterial Activity MIC Assays<sup>2</sup>

The two strains of *E. coli* (MG1655 and BAS901 *imp-4213, zab4292::Tn5*)<sup>3</sup> bacterium were obtained from Prof. Kim Lewis, Department of Biology, Northeastern University. The *B. subtilis* strain (JH642, *trpC2 pheA1*)<sup>4</sup> was obtained from Prof. Alan D. Grossman, Department of Biology, Massachusetts Institute of Technology.

*Preparation of inoculum:* The Gram(-) wild-type *E. coli* and Gram-(+) *B. subtilis* were cultured in liquid Luria Broth (LB) and Gram-(+)-like *imp* bacteria was cultured in liquid LB containing Kanamycin at 50 µg/mL. Strains were cultured overnight in liquid LB medium and further diluted 10-fold into 5 mL fresh LB medium. Cultures were incubated with shaking at 37 °C for 45 min to 1 h to obtain the cell population (approx. 10<sup>8</sup> CFU/mL) with desired optimal optical density (OD<sub>600</sub>). The cultures were further diluted approximately 1000-fold (10<sup>5</sup> CFU/mL) into fresh liquid LB medium and kept at room temperature until needed.

*Preparation of Broth Macrodilution:* The ten target oligosaccharide stock solutions were prepared at 20 mM in dimethyl sulfoxide (DMSO). Working solutions were prepared in liquid LB with the tested compounds at 4X, where X is the final concentration desired. To each well of a 96- well microtiter plate was dispensed 100 µL of fresh liquid LB. A 100 µL aliquot of each tested compound was added to the first well of a row, which was then serially diluted 1:2 to give a series of seven concentrations. Then 100 µL of the already prepared culture solution was added to each well. Optical densities were recorded on Biotek synergy HT plate reader at 600

---

<sup>2</sup> The assay was performed by the broth dilution method described by the National Committee for Clinical Laboratory Standard Methods (M7-A6, 2003)

<sup>3</sup> Sampson, B. A.; Misr, R.; Benson, S. A. *Genetics*, **1989**, *122*, 491–501.

<sup>4</sup> Perego, M.; Spiegelman, G. B.; Hoch, J. A. *Molecular Microbiology*, **1988**, *2*, 689-699



nm absorbance with constant shaking. After 16 h, minimum inhibitory concentration (MIC) values were recorded as the lowest concentration at which no visible growth of bacteria was observed.

#### **Section D: MTT Colorimetric Assays<sup>5</sup>**

The human lung epithelial cell line NCI-H460 was obtained from the American Type Culture Collection (ATCC, Manassas, VA). The cells were cultured in RPMI 1640 medium (Invitrogen) supplemented with 10% fetal bovine serum and 2 mM L-glutamine and 100 units/mL penicillin/streptomycin. Cell cultures were maintained in a humidified atmosphere of 5% CO<sub>2</sub> at 37 °C. Cells were passaged at preconfluent densities using a solution containing 0.25% trypsin and 0.5 mM EDTA (Invitrogen). Cells were seeded at a density of 10,000 cell/well in a 96 well plate for 12 hours with 10% FBS, 1% penicillin and streptomycin, and 1% L-glutamine resulting in 80% confluency. Each dose was prepared in 1% FBS medium by 1000X dilution of the drug which was prepared in dimethyl sulfoxide (DMSO) solution to ensure DMSO concentration less than 0.1%. Control experiments showed that 0.1% DMSO had no effect on cytotoxicity. The cell viability was measured by incubating the treated cell with 10 µL of 5mg/mL MTT solution in deionized water per well for 4 h, followed by solubilizing the resulting formazan salt with DMSO for 45min. Absorbance was detected by a Gen5 Reader at 562 nm. The experiment was performed in 3 replicate wells of each compound or concentration with at least three experimental runs (N = 9). Data were analyzed by using GraphPad Prism version 5.03 for Windows, GraphPad Software, San Diego California USA. The cell survival at 100 µM was < 1 %.

---

<sup>5</sup> (a) Mosmann, T. *J. Immunological Methods*, **1983**, *65*, 55-63. (b) Chanvorachote, P.; Nimmannit, U.; Stehlik, C.; Wang, L.; Jiang, B.-H.; Ongpipatanakul, B.; Rojanasakul, Y. *Cancer Res.*, **2006**, *66*, 6353-6360

**Table S1.** Nonlinear-regression analysis of MTT dose-dependent experiment for the ten oligosaccharides (SE = Standard Error).

| Compd                 | 1      | 2      | 3      | 4      | 5      | 6      | 7      | 8      | 9      | 10     |
|-----------------------|--------|--------|--------|--------|--------|--------|--------|--------|--------|--------|
| IC <sub>50</sub> (μM) | 90.9   | 12.5   | 9.1    | 12.8   | 12.2   | 15.4   | 7.5    | 16.4   | 16.5   | 9.8    |
| SE (μM)               | 1.791  | 1.078  | 1.033  | 1.103  | 1.073  | 1.294  | 1.052  | 1.222  | 1.182  | 1.213  |
| R <sup>2</sup>        | 0.9719 | 0.9819 | 0.9653 | 0.9728 | 0.9619 | 0.9651 | 0.9414 | 0.9445 | 0.9490 | 0.9608 |

### Section E: NCI Growth Inhibition Assays<sup>6</sup>

The human tumor cell lines were grown in RPMI 1640 medium containing 5% fetal bovine serum and 2 mM L-glutamine. Cells (100 μL) were inoculated into 96 well microtiter plates at plating densities ranging from 5,000 to 40,000 cells/well depending on the doubling time of individual cell lines. After cell inoculation, the microtiter plates were incubated at 37 °C, 5% CO<sub>2</sub>, 95% air and 100% relative humidity for 24 h prior to addition of experimental drugs. After 24 h, two plates of each cell line were fixed in situ with TCA, to represent a measurement of the cell population for each cell line at the time of drug addition (Tz). Experimental drugs are solubilized in dimethyl sulfoxide at 400-fold higher concentration than the desired final maximum test concentration and stored frozen prior to use. At the time of drug addition, an aliquot of frozen concentrate was thawed and diluted to twice the desired final maximum test concentration with complete medium containing 50 μg/mL gentamicin. Additional four or 10-fold or ½ log serial dilutions were made to provide a total of five drug concentrations plus control. Aliquots of 100 μL of these different drug dilutions were added to the appropriate microtiter wells already containing 100

<sup>6</sup> Screening Services - NCI-60 DTP Human Tumor Cell Line Screen Home Page.

<http://dtp.nci.nih.gov/branches/btb/ivclsp.html> (accessed October 15, 2010)

μL of medium, resulting in the required final drug concentrations. Following drug addition, the plates are incubated for an additional 48 h at 37 °C, 5% CO<sub>2</sub>, 95% air, and 100% relative humidity. For adherent cells, the assay was terminated by the addition of cold TCA. Cells were fixed in situ by the gentle addition of 50 μL of cold 50% (w/v) TCA (final concentration, 10 % TCA) and incubated for 60 min at 4 °C. The supernatant was discarded, and the plates were washed five times with tap water and air dried. Sulforhodamine B (SRB) solution (100 μL) at 0.4% (w/v) in 1% acetic acid was added to each well, and plates were incubated for 10 minutes at room temperature. After staining, unbound dye is removed by washing five times with 1 % acetic acid and the plates were air dried. Bound stain was subsequently solubilized with 10 mM trizma base, and the absorbance is read on an automated plate reader at a wavelength of 515 nm. For cells in suspension, the methodology was the same except that the assay was terminated by fixing settled cells at the bottom of the wells by gently adding 50 μL of 80% TCA (final concentration, 16% TCA). Using the seven absorbance measurements [time zero, (Tz), control growth, (C), and test growth in the presence of drug at the five concentration levels (Ti)], the percentage growth was calculated at each of the drug concentrations levels. Percentage growth inhibition was calculated as:

$$[(Ti-Tz)/(C-Tz)] \times 100 \text{ for concentrations for which } Ti \geq Tz$$

$$[(Ti-Tz)/Tz] \times 100 \text{ for concentrations for which } Ti < Tz.$$

Growth inhibition of 50% (GI<sub>50</sub>) was calculated from  $[(Ti-Tz)/(C-Tz)] \times 100 = 50$ , which is the drug concentration resulting in a 50% reduction in the net protein increase (as measured by SRB staining) in control cells during the drug incubation.<sup>7</sup>

---

<sup>7</sup> NCI-60 DTP Human Tumor Cell Line Screen Program in this assay only reported 59 cell lines.

**Table S2.** GI<sub>50</sub> (μM) values for seven oligosaccharides against 60 cancer cell lines.

|                                   |                  | <b>Compound</b> |          |          |          |          |          |           |
|-----------------------------------|------------------|-----------------|----------|----------|----------|----------|----------|-----------|
| <b>Cell Type</b>                  | <b>Cell line</b> | <b>1</b>        | <b>2</b> | <b>3</b> | <b>4</b> | <b>7</b> | <b>8</b> | <b>10</b> |
| <b>Leukemia</b>                   | CCRF-CEM         | 3.88            | 1.19     | 2.25     | 4.5      | 1.07     | 1.25     | 1.18      |
|                                   | HL-60(TB)        | 8.23            | 1.39     | 2.12     | 6.42     | 1.11     | 1.09     | 1.07      |
|                                   | K-562            | 7.49            | 1.85     | 2.41     | 5.36     | 1.33     | 1.51     | 1.58      |
|                                   | MOLT-4           | 5.95            | 1.57     | 2.20     | 5.76     | 1.17     | 1.42     | 1.18      |
|                                   | RPMI-8226        | 4.12            | 1.00     | 1.86     | 2.84     | 0.96     | 1.04     | 0.92      |
|                                   | SR               | 3.20            | 1.20     | 1.45     | 3.83     | 0.86     | 0.92     | 0.85      |
| <b>Non-Small Cell Lung Cancer</b> | A549/ATCC        | 6.69            | 2.08     | 9.47     | 8.18     | 1.18     | 0.80     | 0.97      |
|                                   | EKVX             | 6.40            | 1.60     | 7.55     | 8.12     | 0.77     | 0.78     | 0.64      |
|                                   | HOP-62           | 7.61            | 1.78     | 6.02     | 7.36     | 0.82     | 0.81     | 0.88      |
|                                   | HOP-92           | 3.20            | 0.97     | 0.86     | 1.63     | NA       | 0.61     | 0.60      |
|                                   | NCI-H23          | 7.53            | 1.80     | 6.36     | 7.48     | 0.94     | 0.86     | 0.86      |
|                                   | NCI-H322M        | 7.83            | NA       | 6.81     | 6.24     | 0.96     | 0.81     | 0.76      |
|                                   | NCI-H460         | 6.32            | 1.54     | 7.58     | 8.43     | 0.94     | 0.93     | 0.96      |
|                                   | NCI-H522         | 5.78            | 1.07     | 2.26     | 5.25     | 0.84     | 0.80     | 0.78      |
| <b>Colon Cancer</b>               | COLO-205         | 6.87            | 0.88     | 5.17     | 5.25     | 0.84     | 0.81     | 0.86      |
|                                   | HCC-2998         | 6.99            | 0.93     | 6.94     | 9.08     | 0.86     | 0.88     | 0.92      |
|                                   | HCT-116          | 3.17            | 1.66     | 2.86     | 7.40     | 0.84     | 0.79     | 0.83      |
|                                   | HCT-15           | 8.39            | 7.38     | 7.54     | 8.33     | 1.01     | 0.82     | 1.52      |
|                                   | HT-29            | 4.35            | 1.21     | 8.02     | 8.13     | 0.97     | 0.91     | 0.91      |
|                                   | KM12             | 5.64            | 1.33     | 6.02     | 7.32     | 0.89     | 0.90     | 0.87      |
|                                   | SW-620           | 7.66            | 1.89     | 6.04     | 7.31     | 0.85     | 0.85     | 0.84      |
| <b>CNS Cancer</b>                 | SF-268           | 5.54            | 1.61     | 4.43     | 6.18     | 0.78     | 0.74     | 0.69      |
|                                   | SF-295           | 6.96            | 1.14     | 7.13     | 8.97     | 0.94     | 0.88     | 0.58      |
|                                   | SF-539           | 7.11            | 3.10     | 4.70     | 7.17     | 0.83     | 0.80     | 0.91      |
|                                   | SNB-19           | 7.44            | 2.36     | 5.59     | 7.15     | 0.81     | 0.78     | 0.81      |
|                                   | SNB-75           | 3.42            | 0.90     | 1.36     | 2.18     | 0.50     | 0.54     | 0.62      |
|                                   | U251             | 5.86            | 1.73     | 4.44     | 7.40     | 0.81     | 0.81     | 0.81      |
| <b>Melanoma</b>                   | LOX IMVI         | 4.23            | 0.85     | 1.15     | 5.14     | 0.82     | 0.82     | 0.82      |
|                                   | MALME-3M         | 5.34            | NA       | 5.27     | 6.11     | 0.53     | 0.59     | 0.70      |
|                                   | M14              | 6.78            | 1.48     | 6.11     | 7.23     | 0.83     | 0.82     | 0.85      |
|                                   | MDA-MB-435       | 7.68            | 1.49     | 6.00     | 7.25     | 0.83     | 0.88     | 0.84      |

|                        |                 |      |      |      |      |      |      |      |
|------------------------|-----------------|------|------|------|------|------|------|------|
|                        | SK-MEL-2        | 7.11 | 1.61 | 5.89 | 7.16 | 0.89 | 0.83 | 0.88 |
|                        | SK-MEL-28       | 7.01 | 1.75 | 1.96 | 6.04 | 0.84 | 0.83 | 0.86 |
|                        | SK-MEL-5        | 6.21 | 1.23 | 1.76 | 6.27 | 0.74 | 0.76 | 0.82 |
|                        | UACC-257        | 7.80 | 2.53 | 7.70 | 8.05 | 0.93 | 0.83 | 1.05 |
|                        | UACC-62         | 6.15 | 1.98 | 4.36 | 6.54 | 0.78 | 0.74 | 0.77 |
| <b>Ovarian Cancer</b>  | IGROV1          | 2.48 | NA   | 2.03 | 6.14 | 0.83 | 0.81 | 0.82 |
|                        | OVCAR-3         | 5.91 | 1.49 | 4.84 | 6.07 | 0.77 | 0.84 | 0.80 |
|                        | OVCAR-4         | 6.83 | 1.94 | 8.71 | 7.47 | 0.77 | 0.82 | 0.88 |
|                        | OVCAR-5         | 6.55 | 1.75 | 6.39 | 6.70 | 0.79 | 0.77 | 0.80 |
|                        | OVCAR-8         | 9.10 | 3.09 | 9.12 | 9.12 | 1.54 | 0.90 | 0.89 |
|                        | NCI/ADR-RES     | 9.29 | 7.92 | 9.15 | 8.90 | 3.38 | 0.92 | 2.24 |
|                        | SK-OV-3         | 8.44 | 4.04 | 8.36 | 7.59 | 0.93 | 0.79 | 0.80 |
| <b>Renal Cancer</b>    | 786-0           | 8.34 | 3.42 | 6.71 | 8.65 | 0.96 | 0.90 | 0.93 |
|                        | A498            | 6.73 | 5.13 | 7.57 | 5.64 | 0.73 | 0.67 | 0.02 |
|                        | ACHN            | 8.23 | 4.11 | 7.93 | 7.58 | 0.96 | 0.87 | 0.89 |
|                        | CAKI-1          | 8.78 | 6.57 | 8.45 | 9.24 | 1.42 | 0.86 | 0.60 |
|                        | RXF-393         | 5.24 | 0.97 | 2.10 | 6.65 | 0.76 | 0.64 | 0.72 |
|                        | SN12C           | 7.65 | 1.72 | 3.65 | 6.66 | 0.85 | 0.82 | 0.82 |
|                        | TK-10           | 7.87 | 4.21 | 8.08 | 8.22 | 1.12 | 0.98 | 0.94 |
|                        | UO-31           | 6.61 | NA   | 7.43 | 5.70 | 0.87 | 0.72 | 0.69 |
| <b>Prostate Cancer</b> | PC-3            | 2.37 | 0.89 | 5.30 | 6.55 | 0.82 | 0.71 | 0.75 |
|                        | DU-145          | 7.94 | 2.48 | 7.92 | 7.47 | 0.80 | 0.80 | 0.79 |
| <b>Breast Cancer</b>   | MCF7            | 4.84 | 1.62 | 1.74 | 5.29 | 0.87 | 0.89 | 0.94 |
|                        | MDA-MB-231/ATCC | 6.86 | 1.13 | 2.56 | 6.10 | 0.87 | 0.80 | 0.88 |
|                        | HS 578T         | 5.41 | 1.13 | 2.37 | 6.32 | 0.92 | 0.78 | 0.78 |
|                        | BT-549          | 7.90 | 4.54 | 8.46 | 8.39 | 0.94 | 1.05 | 0.88 |
|                        | T-47D           | 5.62 | 1.65 | 1.46 | 3.56 | 0.79 | 0.75 | 0.74 |
|                        | MDA-MB-468      | 3.32 | 0.93 | 1.47 | 2.65 | 0.78 | 0.75 | 0.79 |

## Section F: $^1\text{H}$ NMR and $^{13}\text{C}$ NMR Spectra

STANDARD PROTON PARAMETERS

Archive directory: /export/home/vnmr1/vnmrsys/data  
Sample directory: /export/home/vnmr1/vnmrsys/data  
File: PROTON

Pulse Sequence: s2pu1  
Solvent: CDCl3  
Temp: 28.0 C / 301.1 K  
INOVA-600 "Inova600"

Relax. delay 1.000 sec  
Pulse 30.0 degrees  
Acq. time 4.000 sec  
Width 334.6 Hz  
4  
Offset 11.0 Hz  
OBSERVE H 599.6670065 MHz  
DATA PROCESSING  
Line broadening 0.2 Hz  
FT size 131072  
Total time 0 min, 20 sec

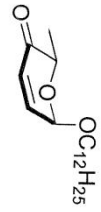

<sup>1</sup>H NMR of (13)  
600 MHz, CDCl<sub>3</sub>

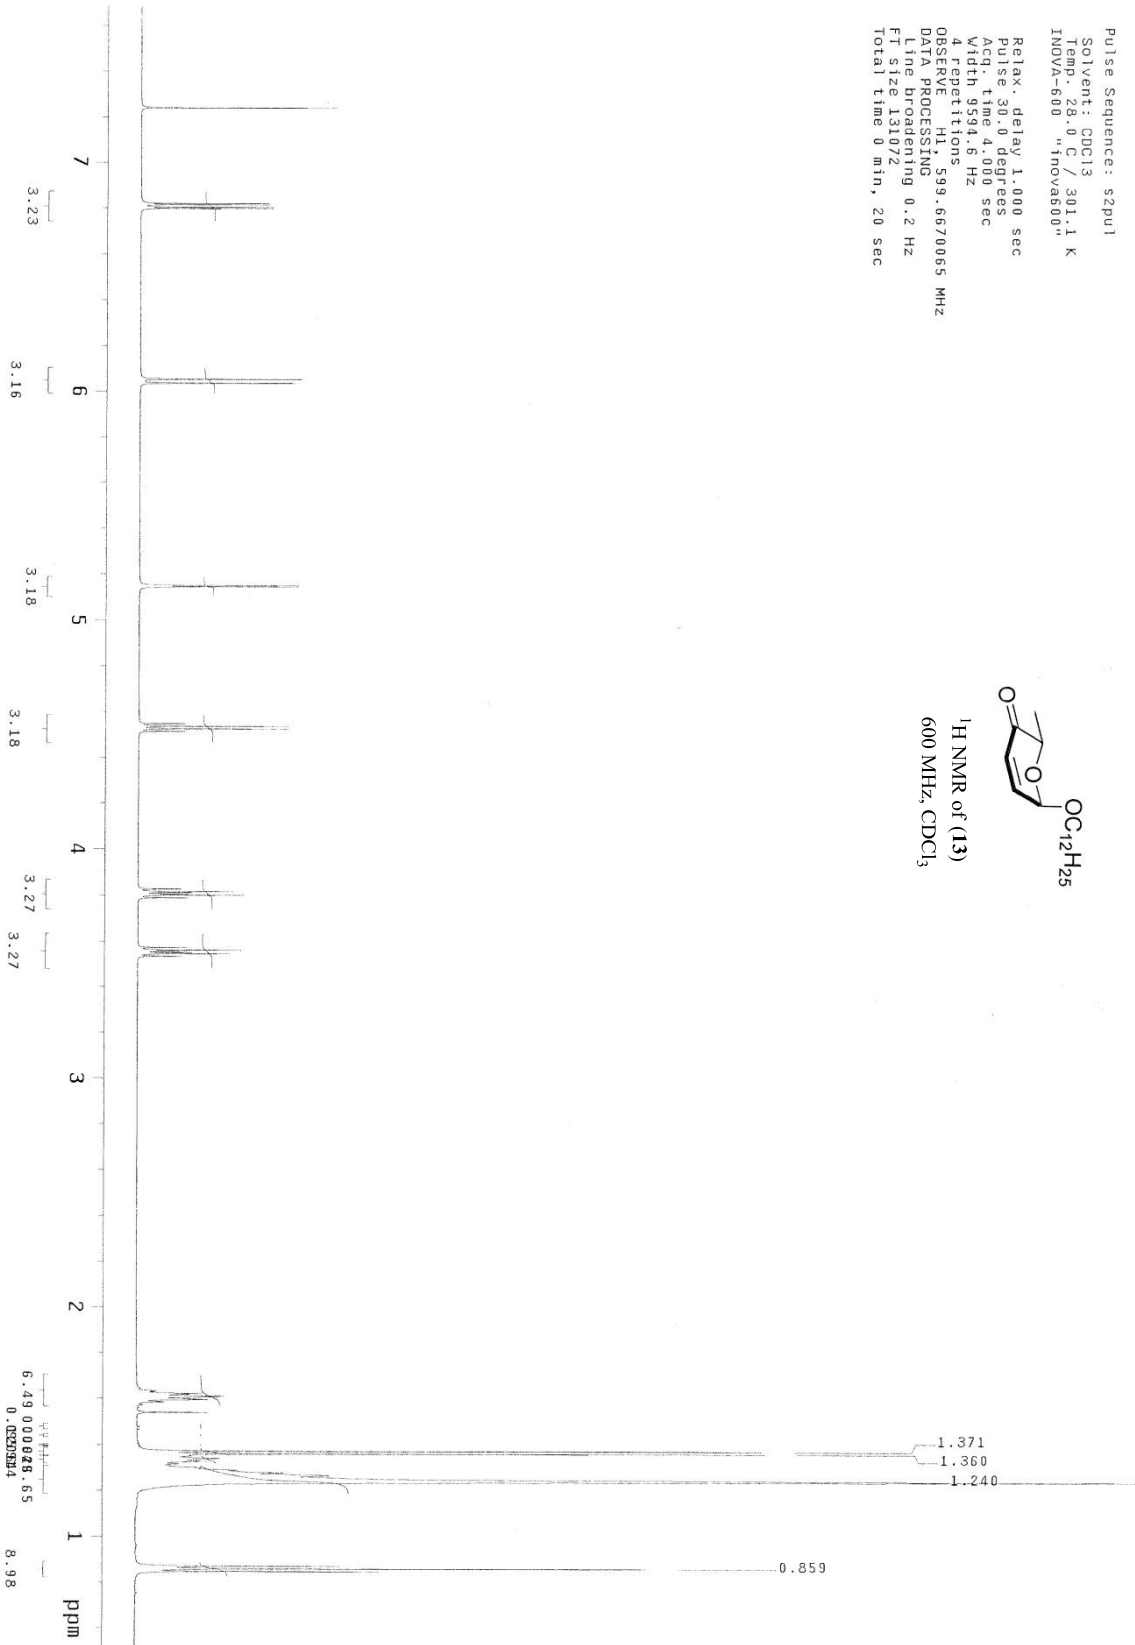

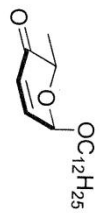

<sup>13</sup>C NMR of (13)  
150 MHz, CDCl<sub>3</sub>

STANDARD CARBON PARAMETERS  
Pulse Sequence: szpul

Solvent: CDCl<sub>3</sub>  
Temp: 28.9 C / 301.1 K  
User: 1-14-87  
INNOVA-600 "Innova600"

Relax. delay 0.500 sec  
Pulse 29.3 degrees  
Acq. time 1.400 sec  
Width 40000.0 Hz  
912 repetitions  
OBSERVE C13, 150.7863836 MHz  
DECUPLE H1, 599.6700024 MHz  
Power 40 dB  
continuously on  
WALTZ-16 modulated  
DATA PROCESSING  
Line broadening 1.0 Hz  
FT size 131072  
Total time 33 hr, 1 min, 30 sec

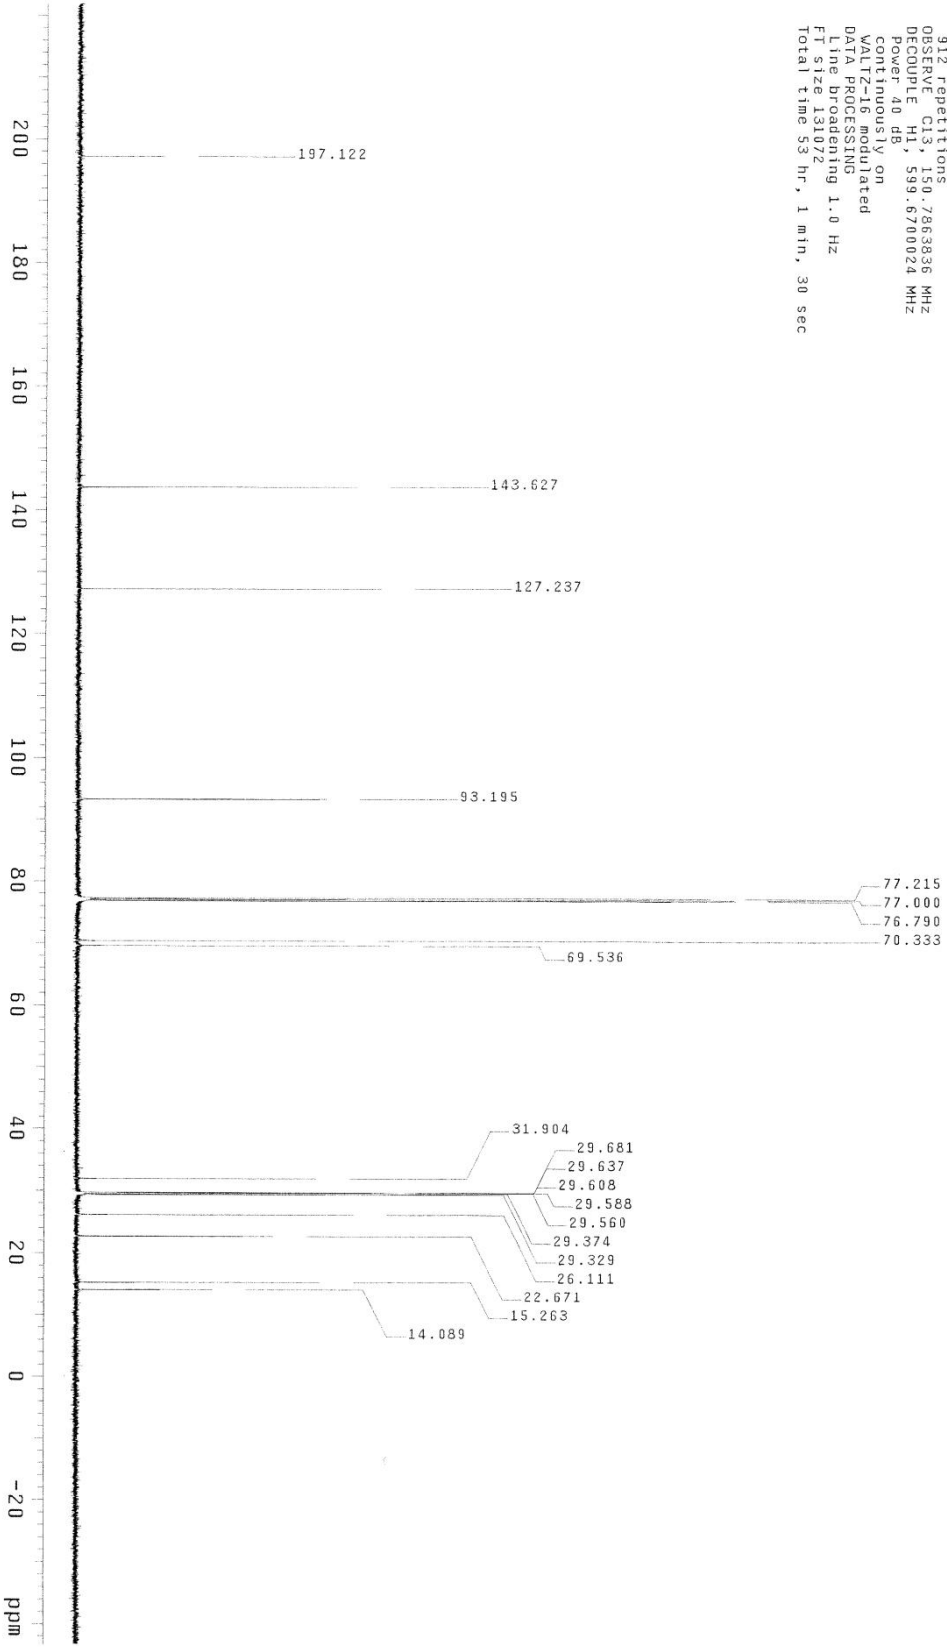

STANDARD PROTON PARAMETERS

Archive directory: /export/home/vnmr1/vnmrSYS/data  
 Sample directory: /export/home/vnmr1/vnmrSYS/data  
 File: PROTON

Pulse Sequence: szpu1  
 Solvent: CDCl3  
 Temp: 28.0 C / 301.1 K  
 INOVA-600 "1novae00"

Relax. delay 1.000 sec  
 Pulse 30.0 degrees  
 Acq. time 4.000 sec  
 Width 9394.6 Hz  
 OBSERVED F1 599.6670063 MHz  
 DATA PROCESSING  
 File PROTON2  
 FT size 131672  
 Total time 0 min, 20 sec

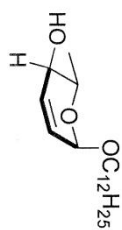

<sup>1</sup>H NMR of (C)  
 (600MHz, CDCl<sub>3</sub>)

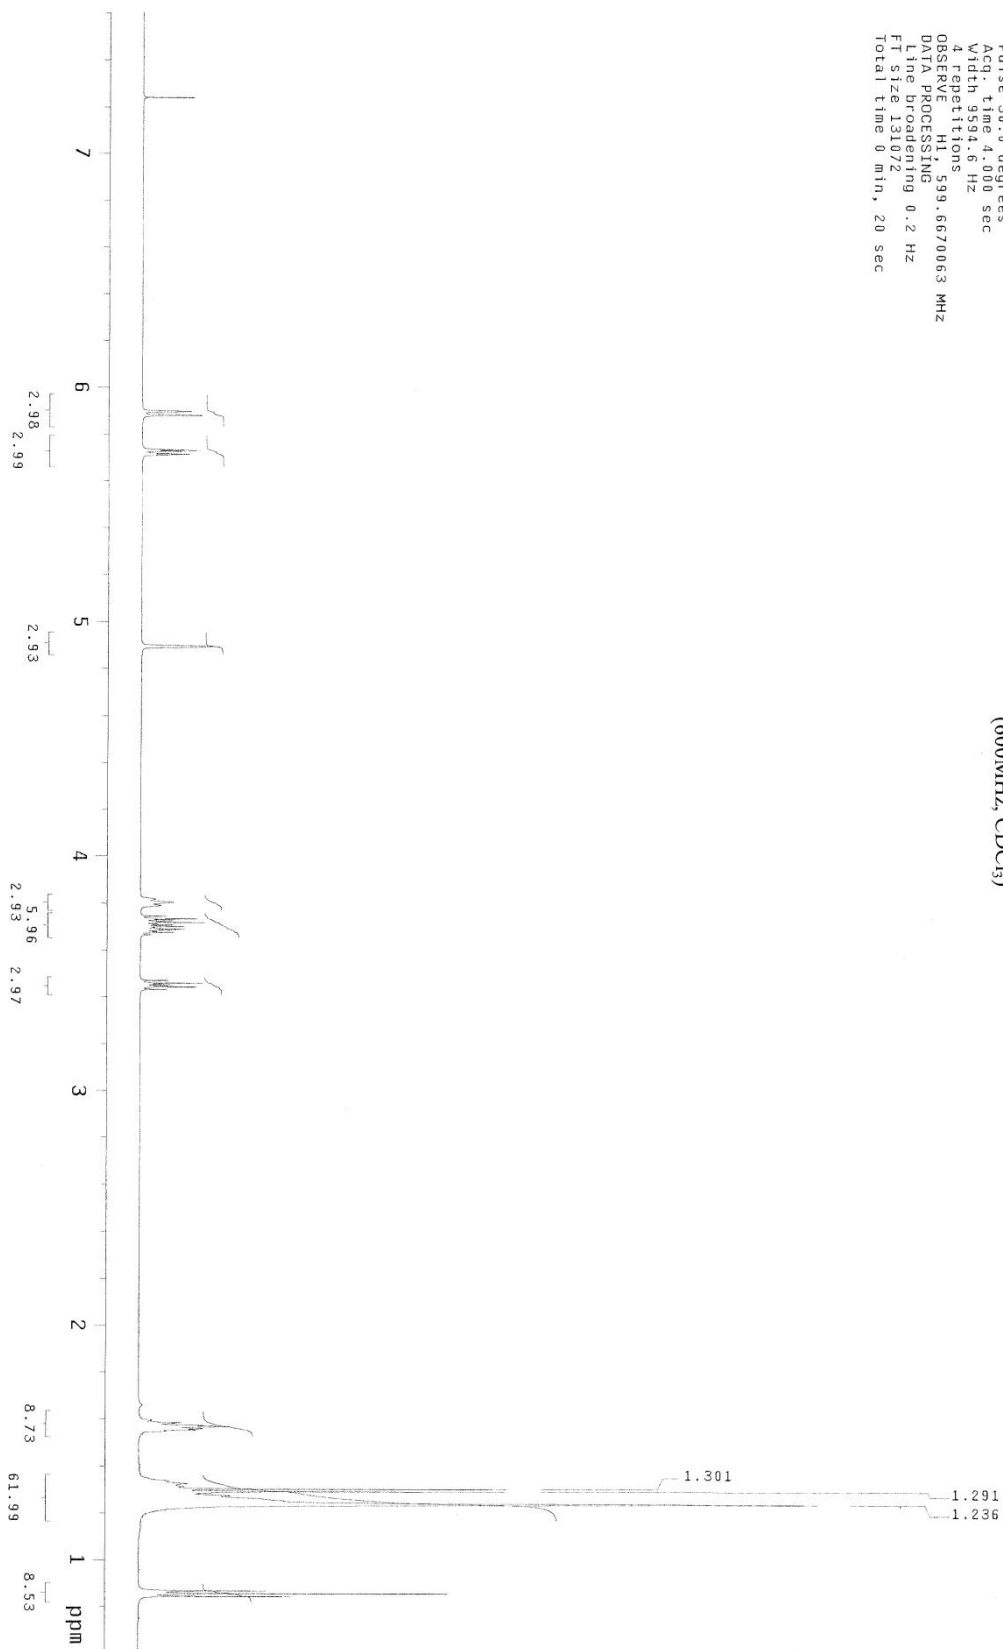



STANDARD CARBON PARAMETERS

Pulse Sequence: szpul  
 Solvent: CDCl3  
 Temp: 29.9 C / 301.1 K  
 US: 47  
 INOVA-600 "inovag600"

Relax. delay: 0.500 sec  
 Pulse: 29.9 degrees  
 Acq. time: 1.400 sec  
 Width: 40000.0 Hz  
 80 repetitions  
 OBSERVE C13, 150.7863849 MHz  
 DECOUPLE H1, 599.6700024 MHz  
 PLOUSE 0 dB  
 Continously on  
 VOLTAGE modulated  
 DATA PROCESSING  
 Line broadening 1.0 Hz  
 FT size 131072  
 Total time 32 min, 34 sec

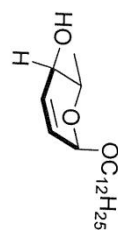

<sup>13</sup>C NMR of (C)  
 (150 MHz, CDCl<sub>3</sub>)

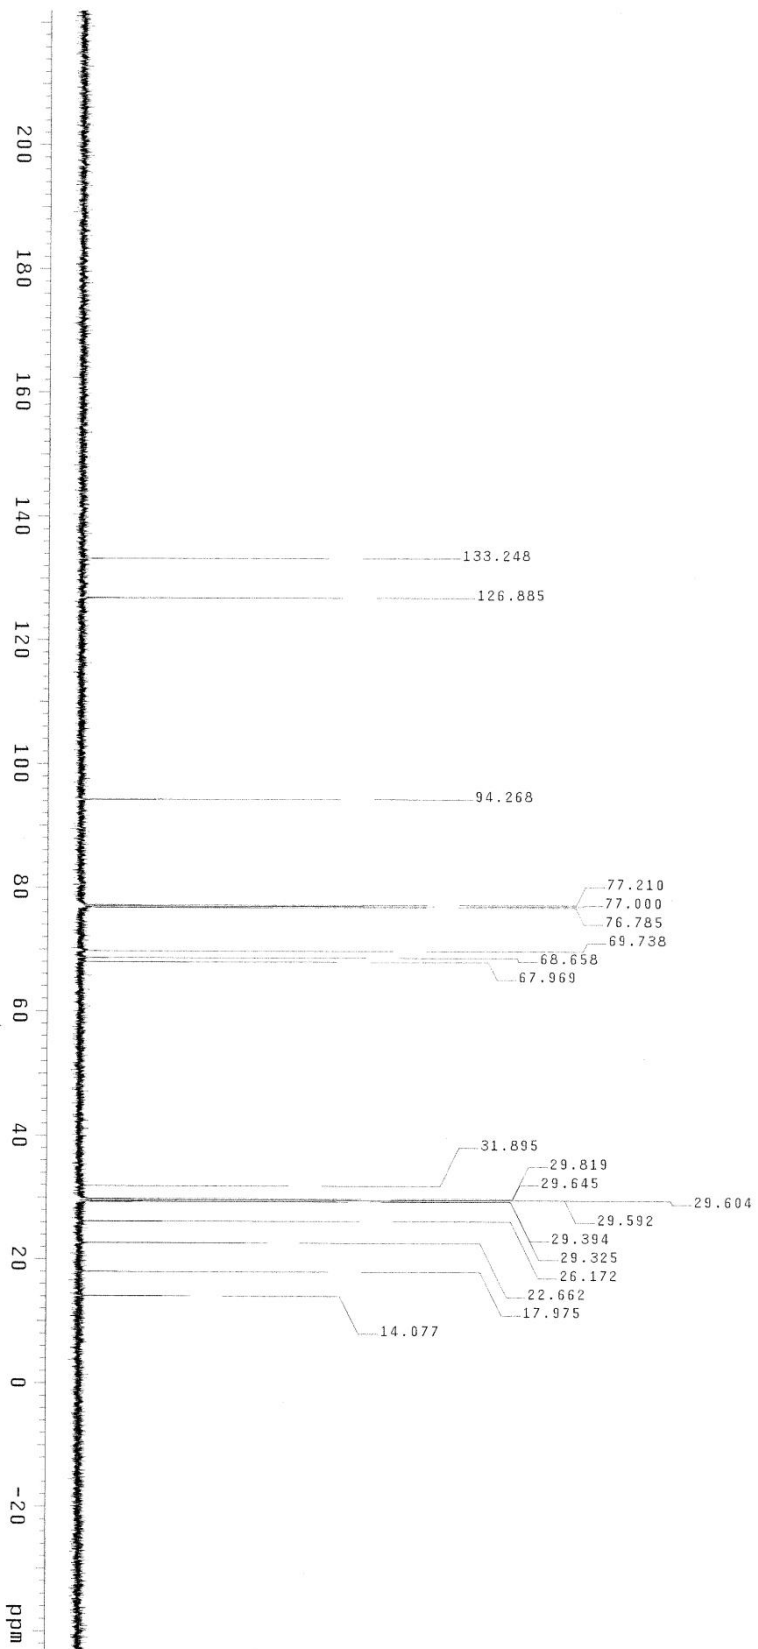

STANDARD PROTON PARAMETERS

Archive directory: /export/home/vnmr1/vnmr-sys/data  
Sample directory:  
File: PROTON

Pulse Sequence: s2pu1  
Solvent: CDCl3  
Temp: 28.0 C / 301.1 K  
INOVA-600 "inovas600"

Relax. delay 1.000 sec  
Pulse: 30.0 degrees  
Acq. time 4.00 sec  
Width 9594.6 Hz  
4 repetitions  
OBSERVE: H1 599.6670060 MHz  
DATA PROCESSING  
Line broadening 0.2 Hz  
FT size 131072  
Total time 0 min, 20 sec

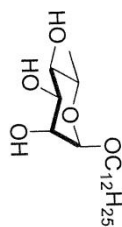

<sup>1</sup>H NMR of (D)  
(600 MHz, CDCl<sub>3</sub>)

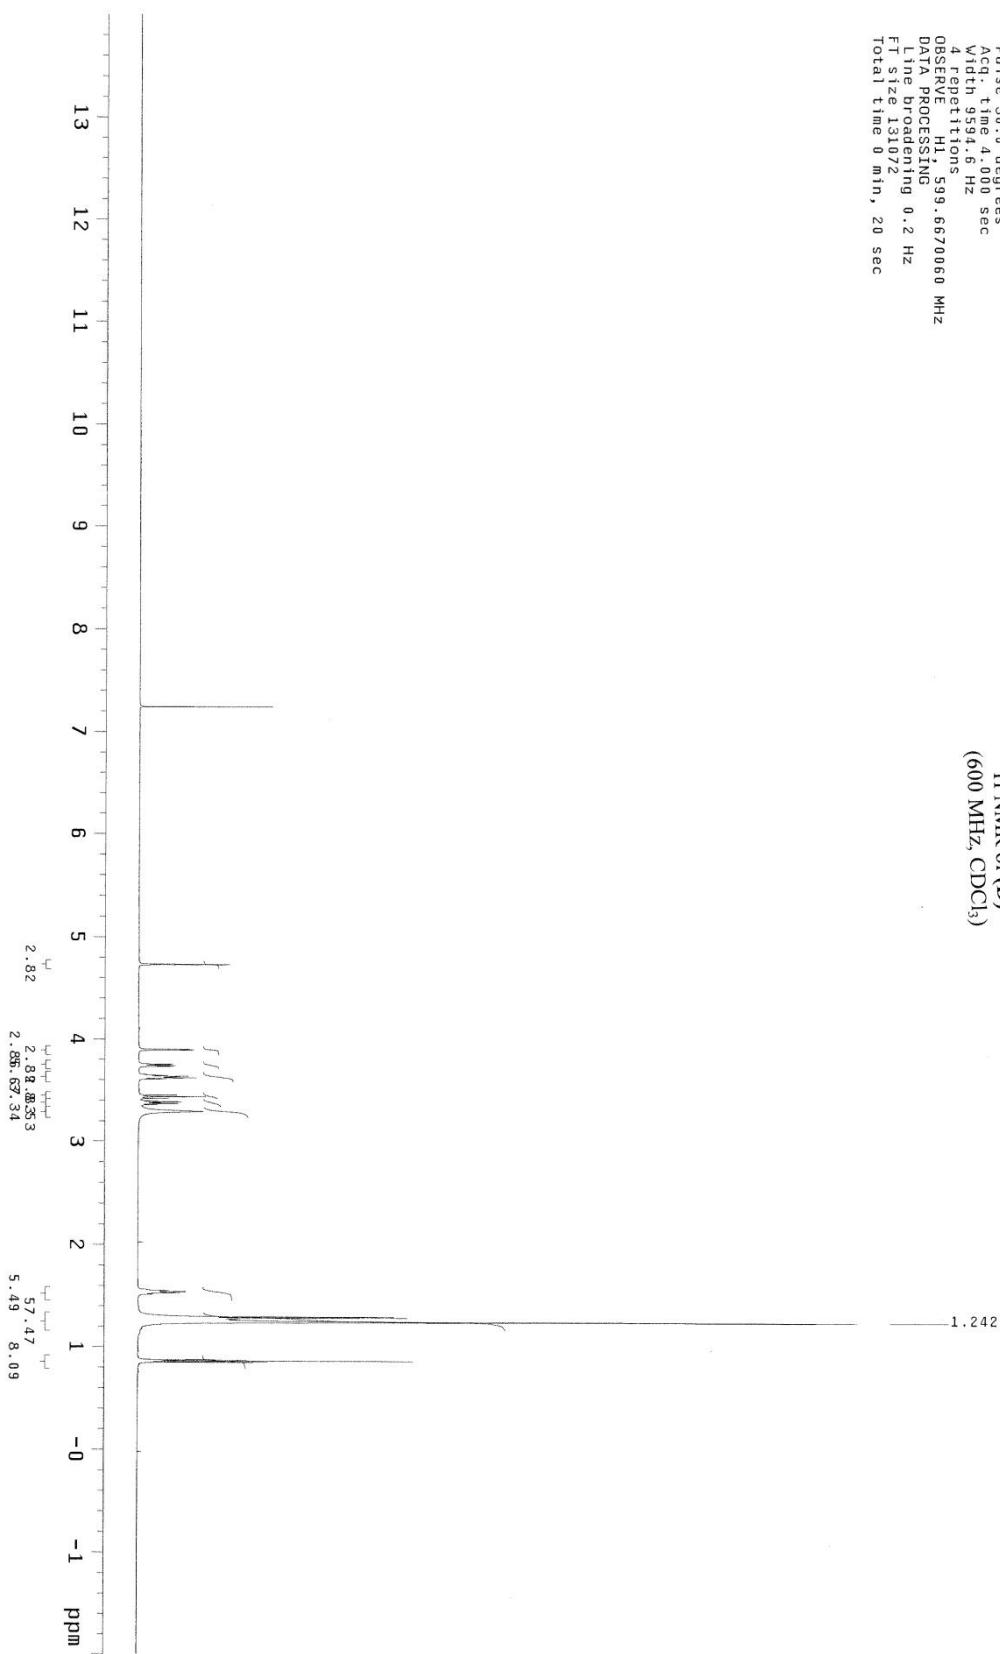

STANDARD CARBON PARAMETERS

Pulse Sequence: s2pul  
 Solvent: CDCl3  
 Temp: 28.0 C / 301.1 K  
 User: 1-14-87 / 301.1 K  
 INOVA-600 "Inova600"

Relax: delay 0.500 sec  
 pulse 29.9 degrees  
 Acq: time 1.400 sec  
 Width 40000.0 Hz  
 176 repetitions  
 OBSERVE C13, 150.7863843 MHz  
 DECOUPLE H1, 599.6700024 MHz  
 Power 40 dB  
 continuously on  
 WALTZ-16 modulated  
 DATA PROCESSING  
 Line broadening 1.0 Hz  
 FI size 131072  
 Total time 32 min, 34 sec

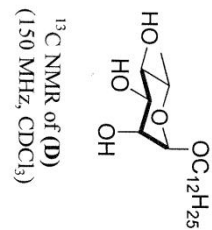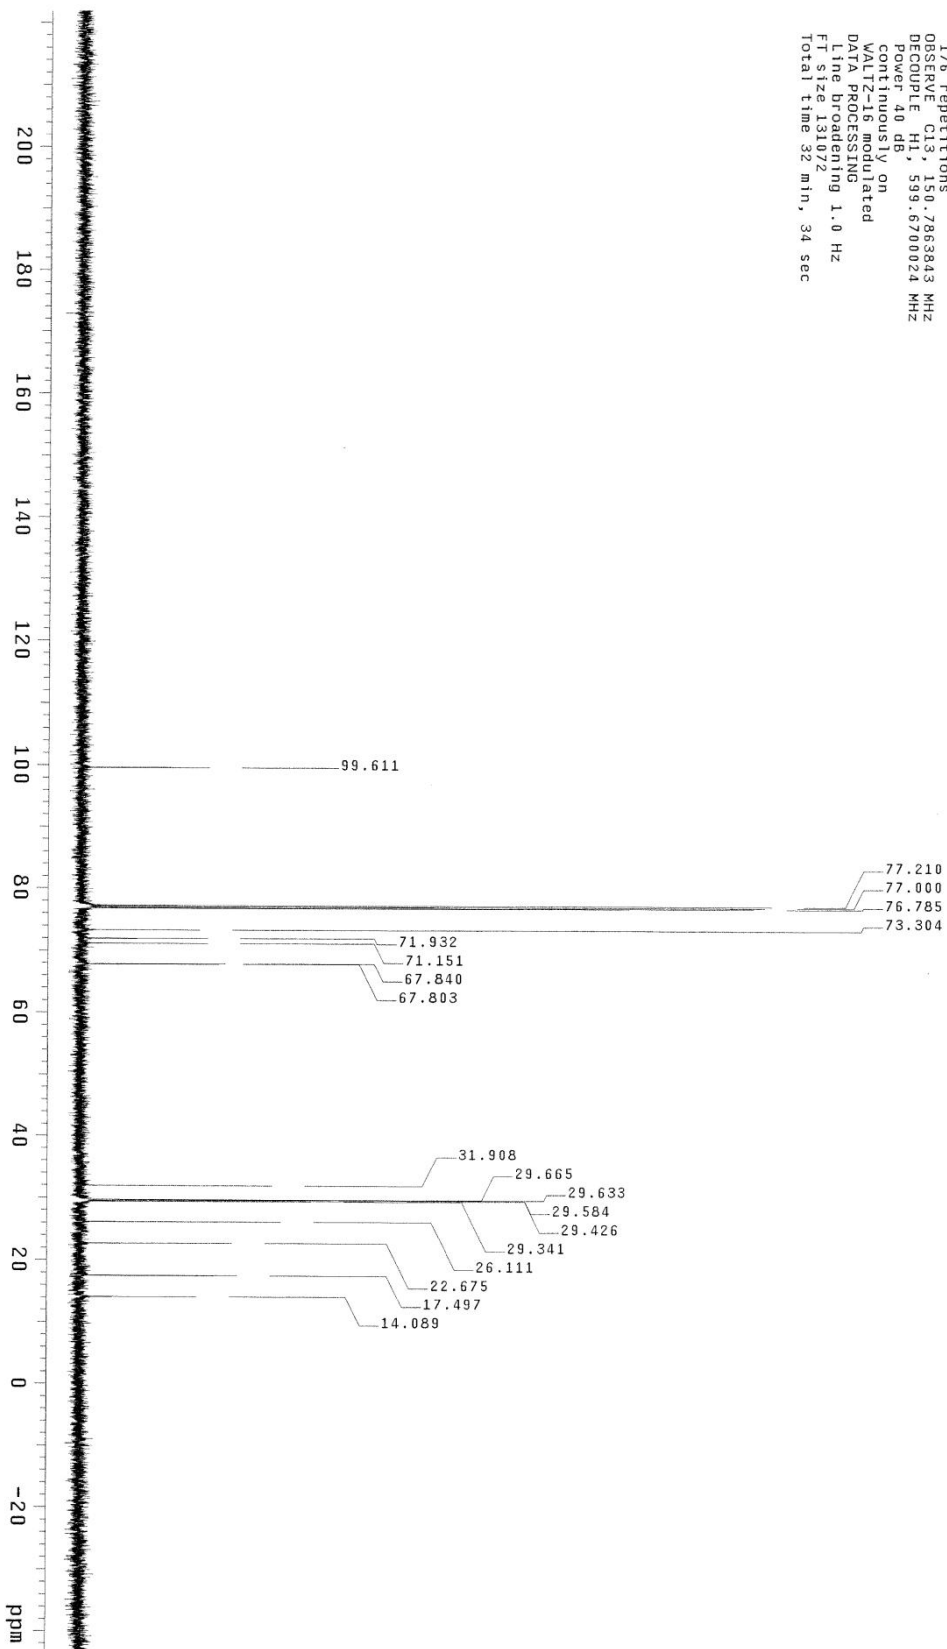

STANDARD PROTON PARAMETERS

Archive directory: /export/home/vmr1/vmrSYS/data  
Sample directory:  
File: PROT0N

Pulse Sequence: s2pu1

Solvent: CDCl3  
Temp: 28.0 C / 301.1 K  
INOVA-600 "inova600"

Relax. delay 1.000 sec  
Pulse 30.0 degrees  
Acq. time 4.000 sec  
Width 9594.6 Hz  
4 repetitions  
OBSERVE H1, 599.6670060 MHz  
DATA PROCESSING  
Line broadening 0.2 Hz  
FT size 131072  
Total time 0 min, 20 sec

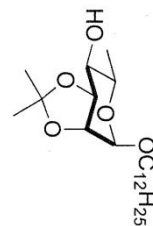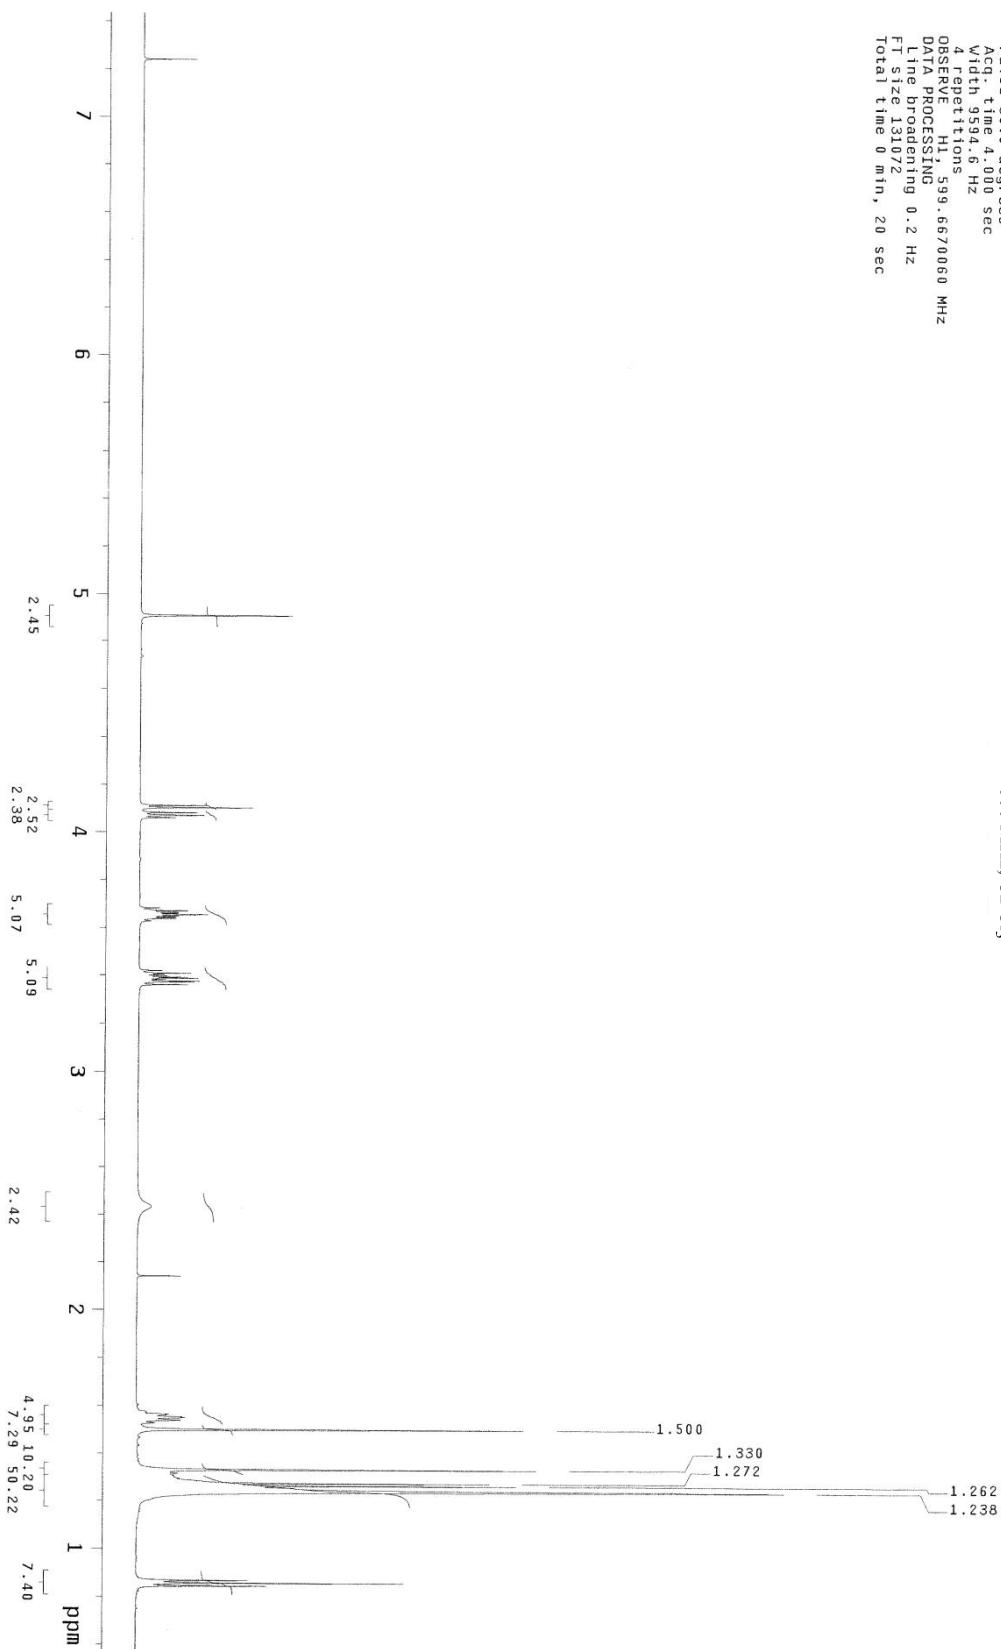

STANDARD CARBON PARAMETERS

Pulse Sequence: s2pul  
Solvent: CDCl<sub>3</sub>  
Temp: 28.0 C / 301.1 K  
User: 1-14-87  
INOVA-500 "inova600"

Relax. delay 0.500 sec  
Pulse 29.9 degrees  
Acq. time 1.400 sec  
Width 40000.0 Hz  
5280 repetitions  
OBSERVE C13, 150.7863843 MHz  
DECOUPLE H1, 599.6700024 MHz  
Power 40 dB  
continuously on  
WALTZ-16 modulated  
DATA PROCESSING  
Line broadening 1.0 Hz  
F1 size 131072  
Total time 53 hr, 1 min, 30 sec

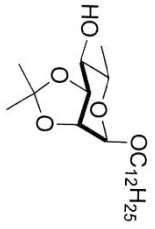

<sup>13</sup>C NMR of (14)  
150 MHz, CDCl<sub>3</sub>

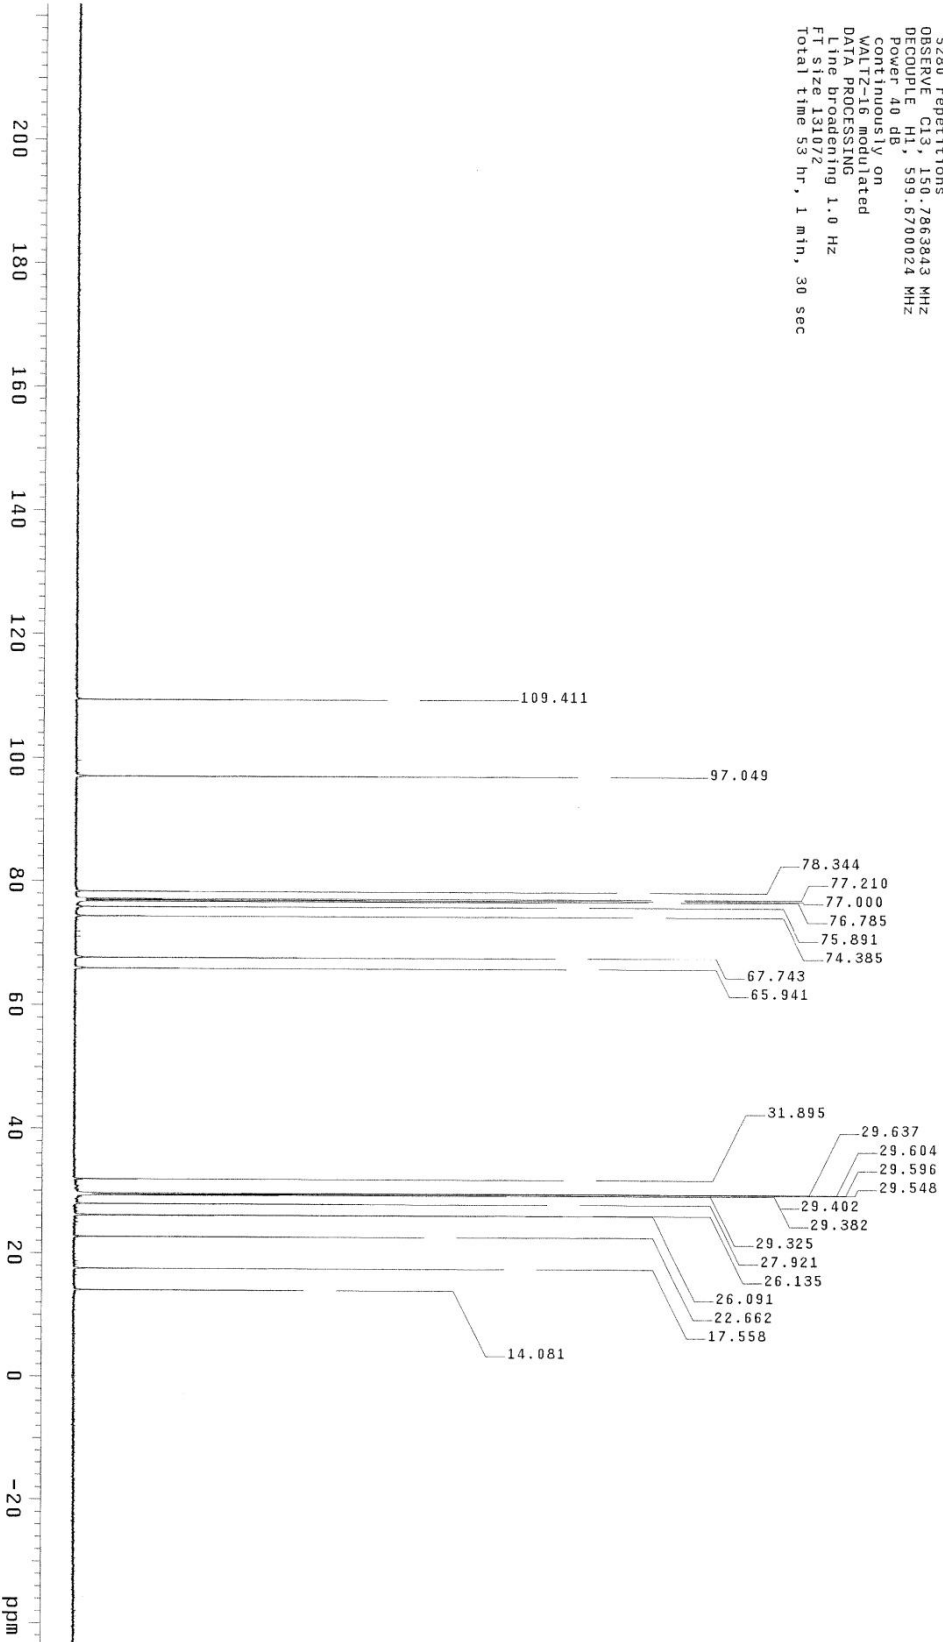

STANDARD PROTON PARAMETERS

Archive directory: /export/home/vnmr1/vnmrSYS/data  
Sample directory:  
File: PROTON

Pulse Sequence: szpul1

Solvent: CDCl3

Temp: 28.0 C / 301.1 K

INOVA-600 "Inova600"

Relax. delay: 1.000 sec

Pulse: 30.0 degrees

Acq. time: 4.000 sec

Width: 9394.6 Hz

Observations: 599.6670071 MHz

DATA PROCESSING  
Time Processing: 0.2 Hz  
File size: 131072  
Total time: 0 min, 20 sec

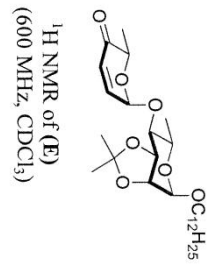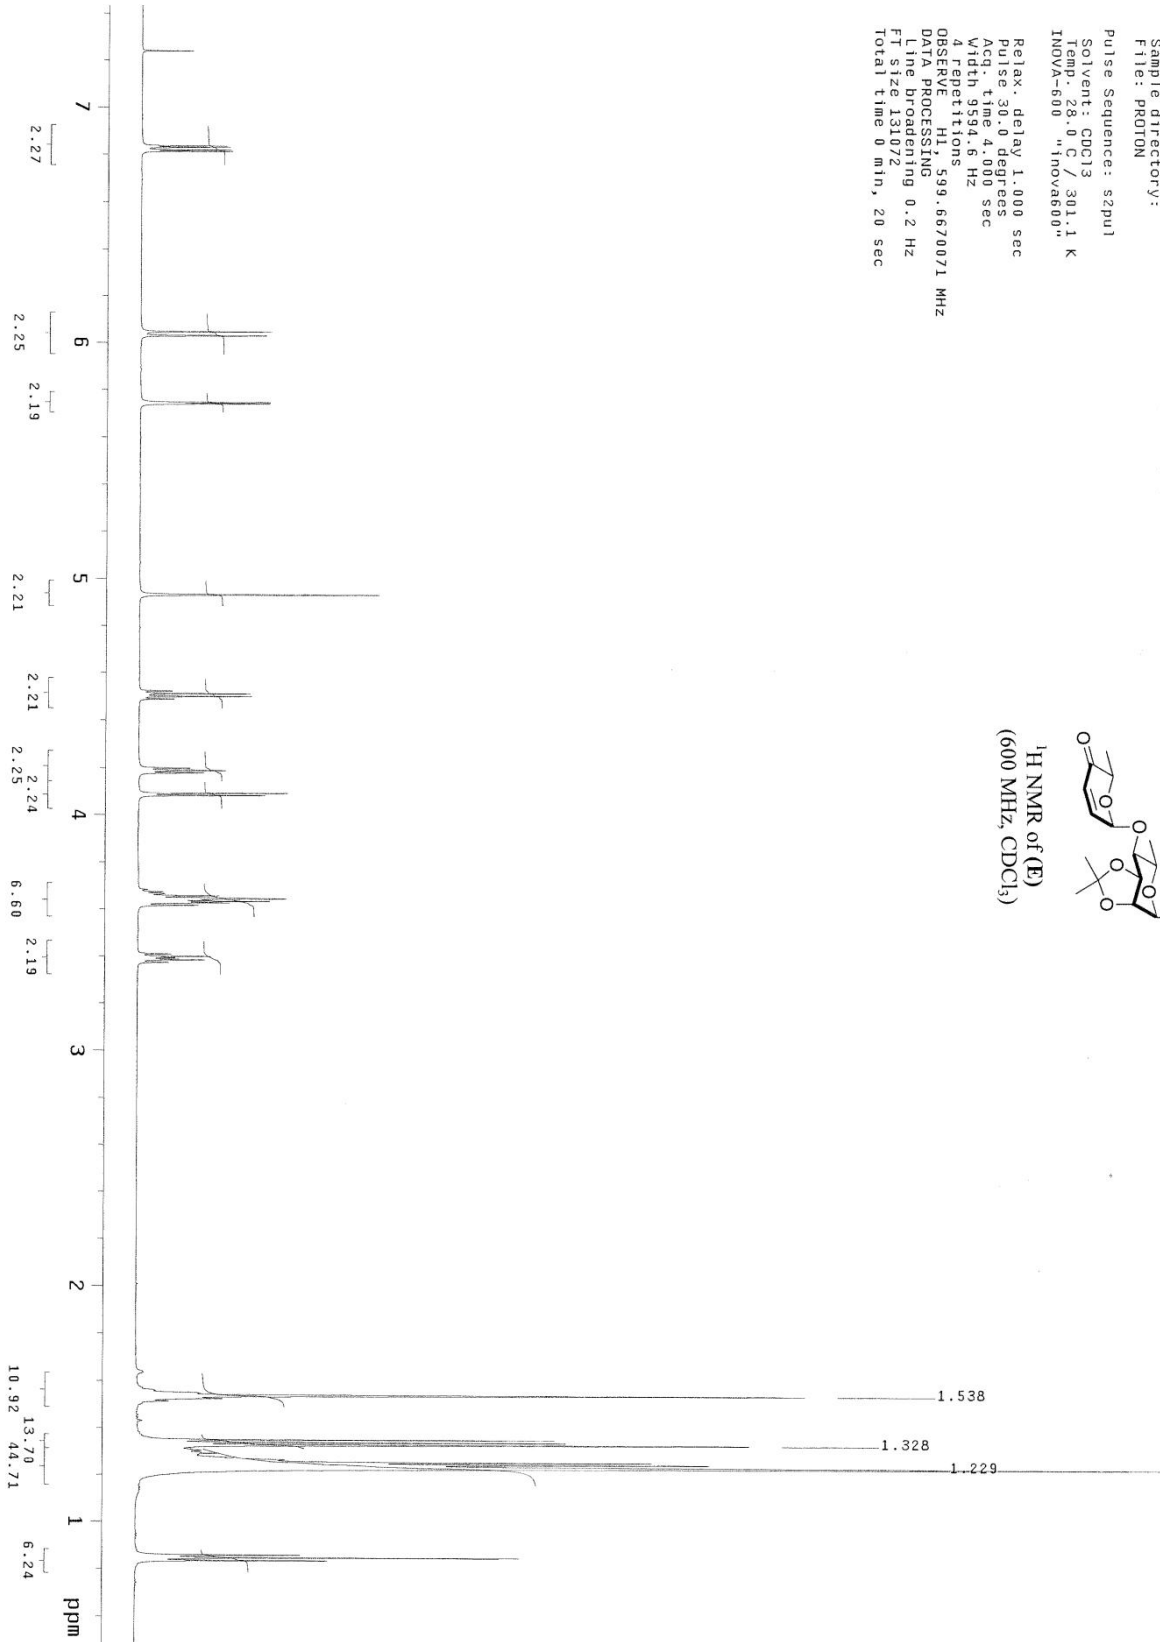

STANDARD CARBON PARAMETERS  
 Pulse Sequence: s2pu1  
 Solvent: CDCl3  
 Temp: 28.0 C / 301.1 K  
 User: 1-14-87  
 INOVA-600 "inova600"

Relax. delay 0.500 sec  
 Pulse prog zgpg30  
 Acq time 1.490 sec  
 Width 40000.0 Hz  
 144 repetitions  
 OBSERVE C13, 150.7863855 MHz  
 DECUPLE H1, 599.6700024 MHz  
 Power 40 dB  
 continuously on  
 WALTZ-16 modulated  
 DATA PROCESSING  
 Line broadening 1.0 Hz  
 FT size 131072  
 Total time 53 hr, 1 min, 30 sec

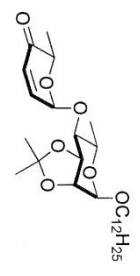

<sup>13</sup>C NMR of (E)  
 (150 MHz, CDCl<sub>3</sub>)

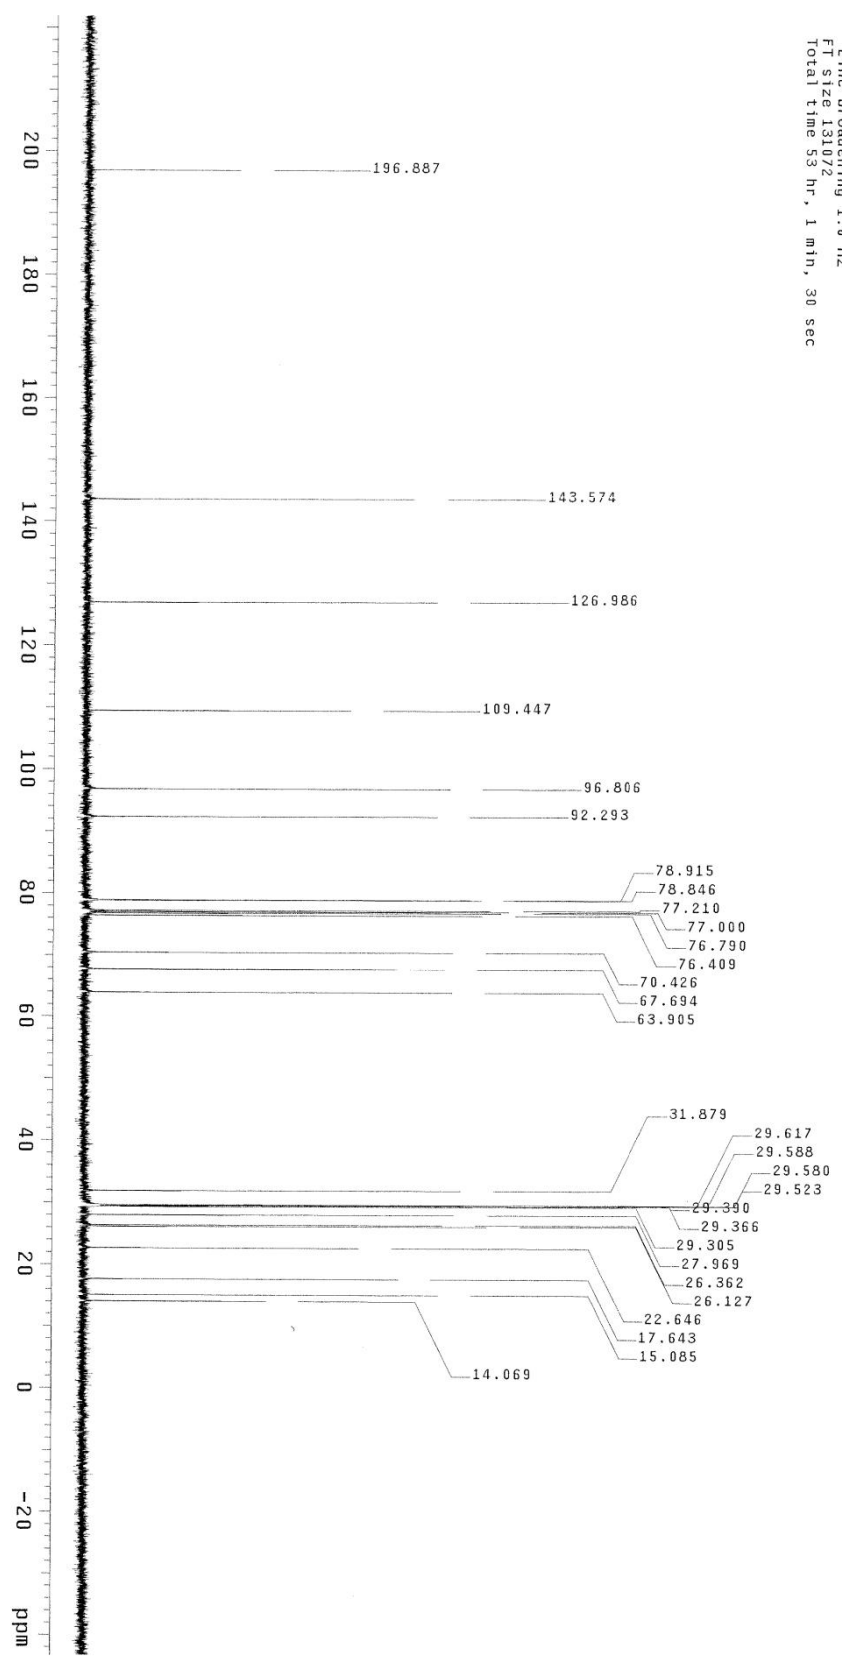

STANDARD PROTON PARAMETERS

Archive directory: /export/home/vnmr1/vnmr-sys/data  
 Sample directory:  
 File: PROTON

Pulse Sequence: s2pul  
 Solvent: CDCl3  
 Temp: 28.0 C / 301.1 K  
 INOVA-600 "inova600"

Relax. delay: 1.000 sec  
 Pulse: 30.0 degrees  
 Acq. time: 4.000 sec  
 Width: 9594.6 Hz  
 4 repetitions  
 OBSERVE: H1, 599.6670063 MHz  
 DATA PROCESSING  
 Line broadening: 0.2 Hz  
 FT size: 131072  
 Total time: 0 min, 20 sec

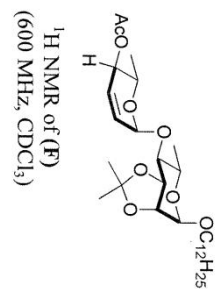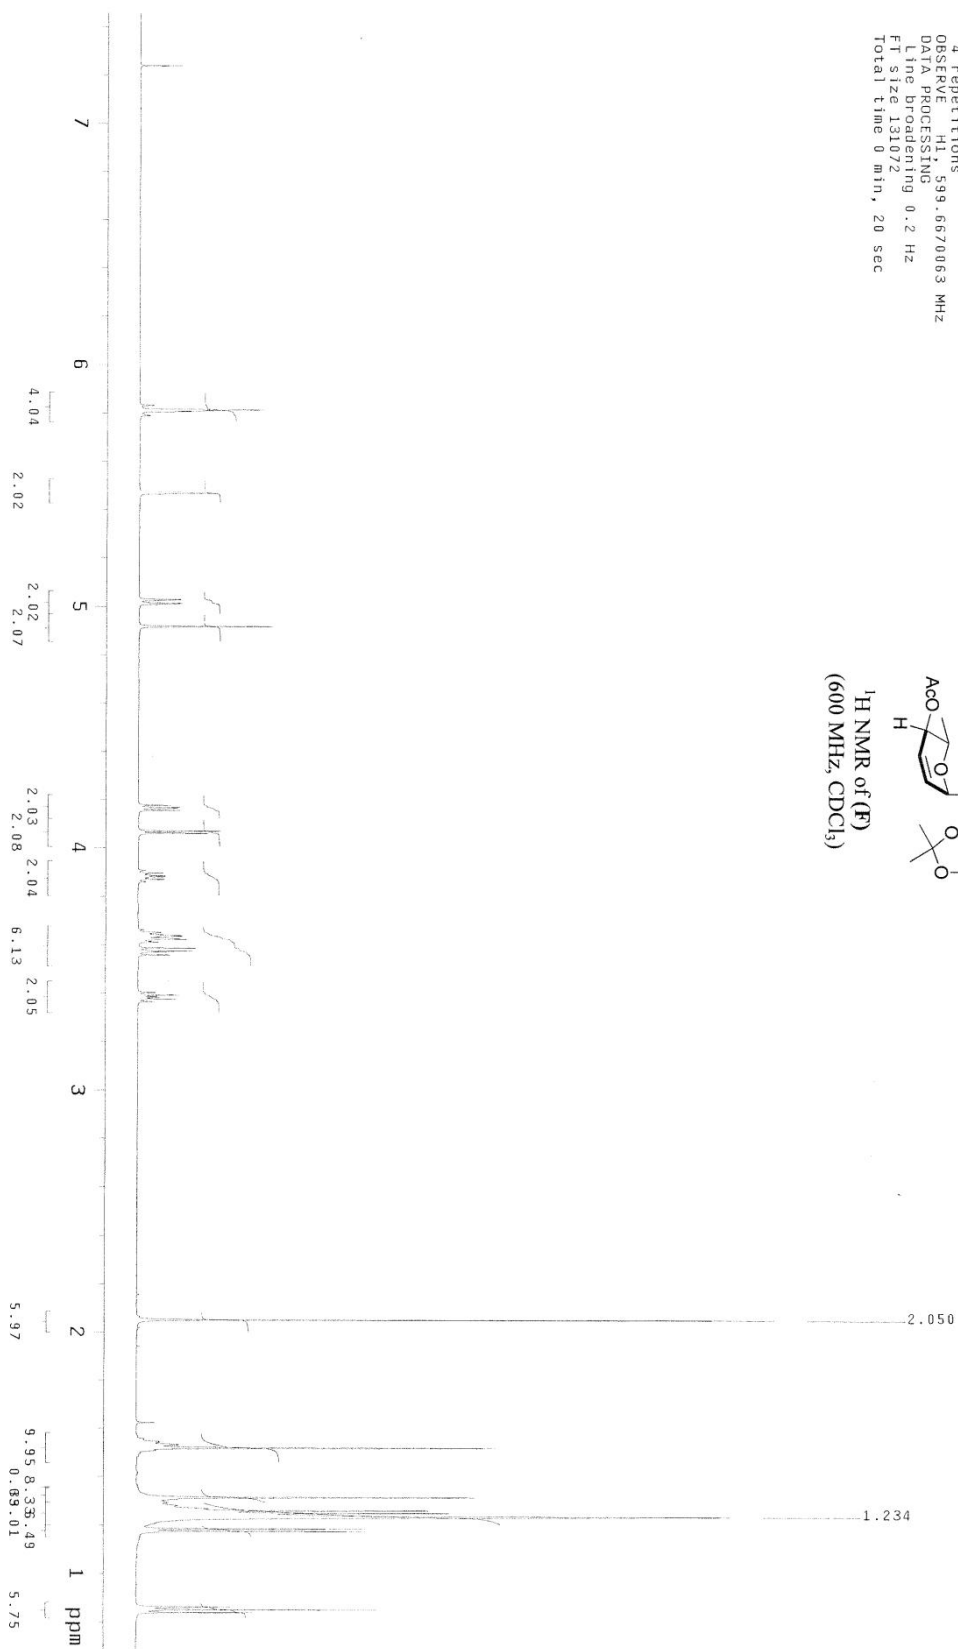



STANDARD CARBON PARAMETERS

Pulse Sequence: s2pul  
 Solvent: CDCl<sub>3</sub>  
 Temp.: 298.0 C / 301.1 K  
 User: 114-87  
 INOVA-600 "fnova600"  
 Relax. delay 0.500 sec  
 Pulse 29.9 degrees  
 Acq. time 1.400 sec  
 Width 40000.0 Hz  
 NS 80  
 NS repetitions 50.7963855 MHz  
 OBSERVE CH 1, 599.6700024 MHz  
 Power 40 dB, continuously on  
 VOLT-16 modulated  
 DATA PROCESSING  
 Line broadening 1.0 Hz  
 FT size 131072  
 Total time 32 min, 34 sec

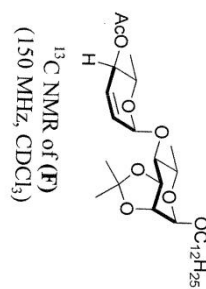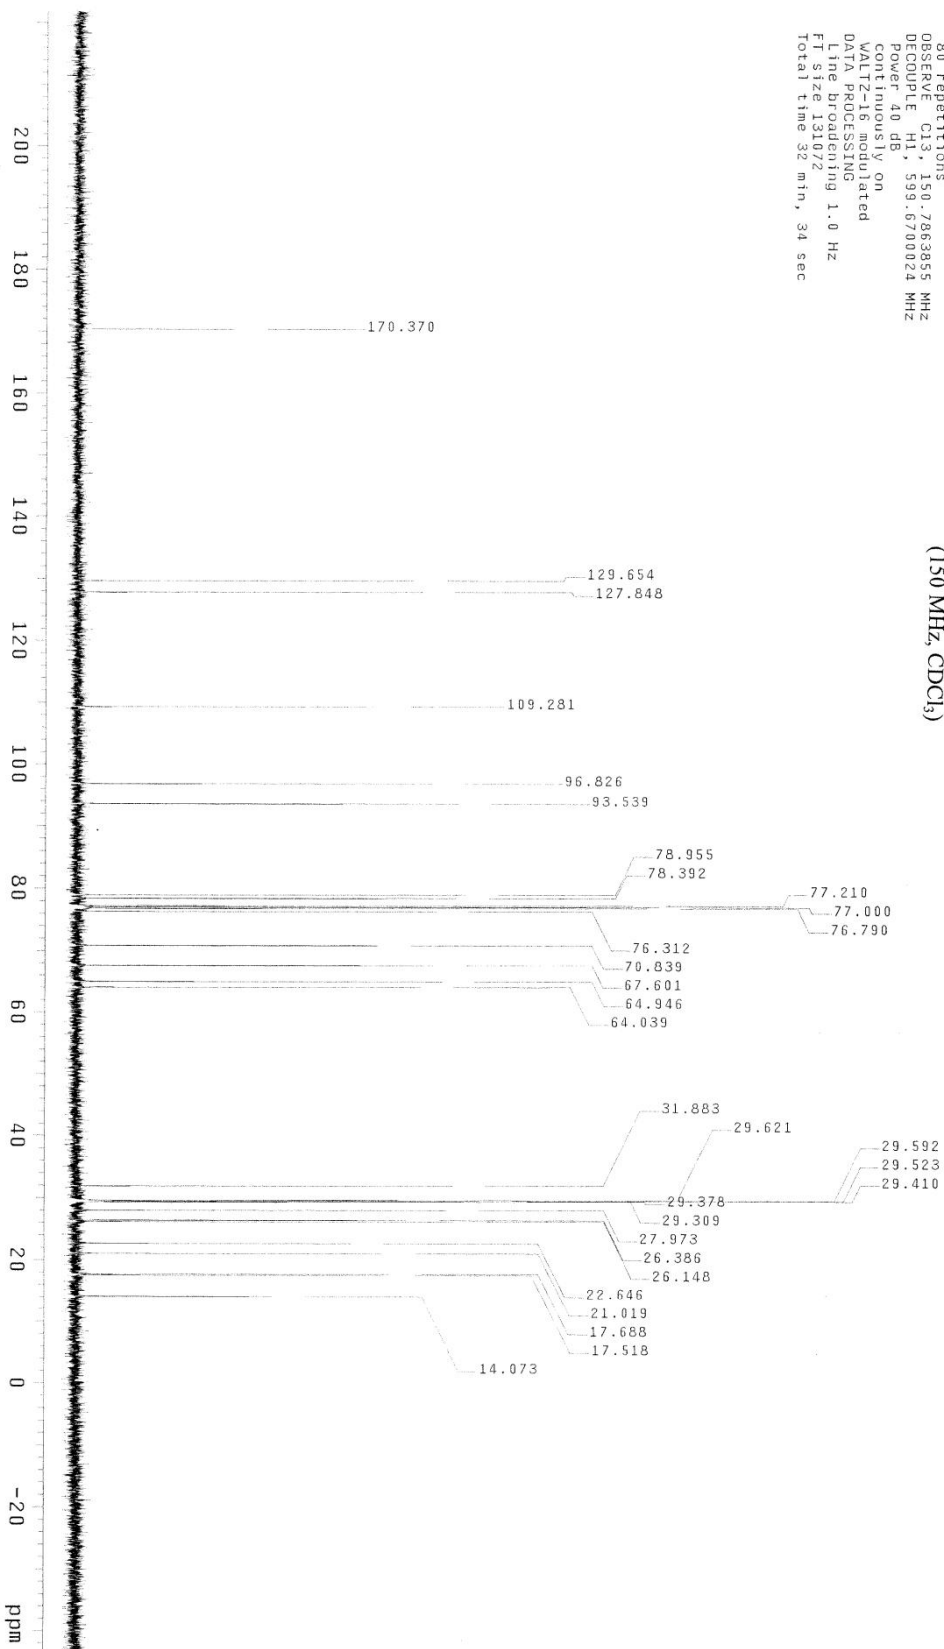

STANDARD PROTON PARAMETERS

Archive directory: /export/home/vnmr1/vnmr/sys/data  
 Sample directory: /  
 File: PROTON

Pulse Sequence: s2pu1  
 Solvent: CDCl3  
 Temp: 58.0 C / 301.1 K  
 INOVA-600 "Inova600"

Relax. delay 1.000 sec  
 Pulse 30.0 degrees  
 Acq. time 4.000 sec  
 Width 9594.6 Hz  
 4 repetitions  
 OBSERVE H1, 599.6670062 MHz  
 DATA PROCESSING  
 Line broadening 0.2 Hz  
 F1 size 131072  
 Total time 0 min, 20 sec

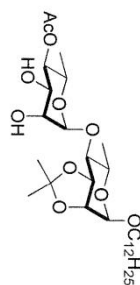

<sup>1</sup>H NMR of (15)  
 600 MHz, CDCl<sub>3</sub>

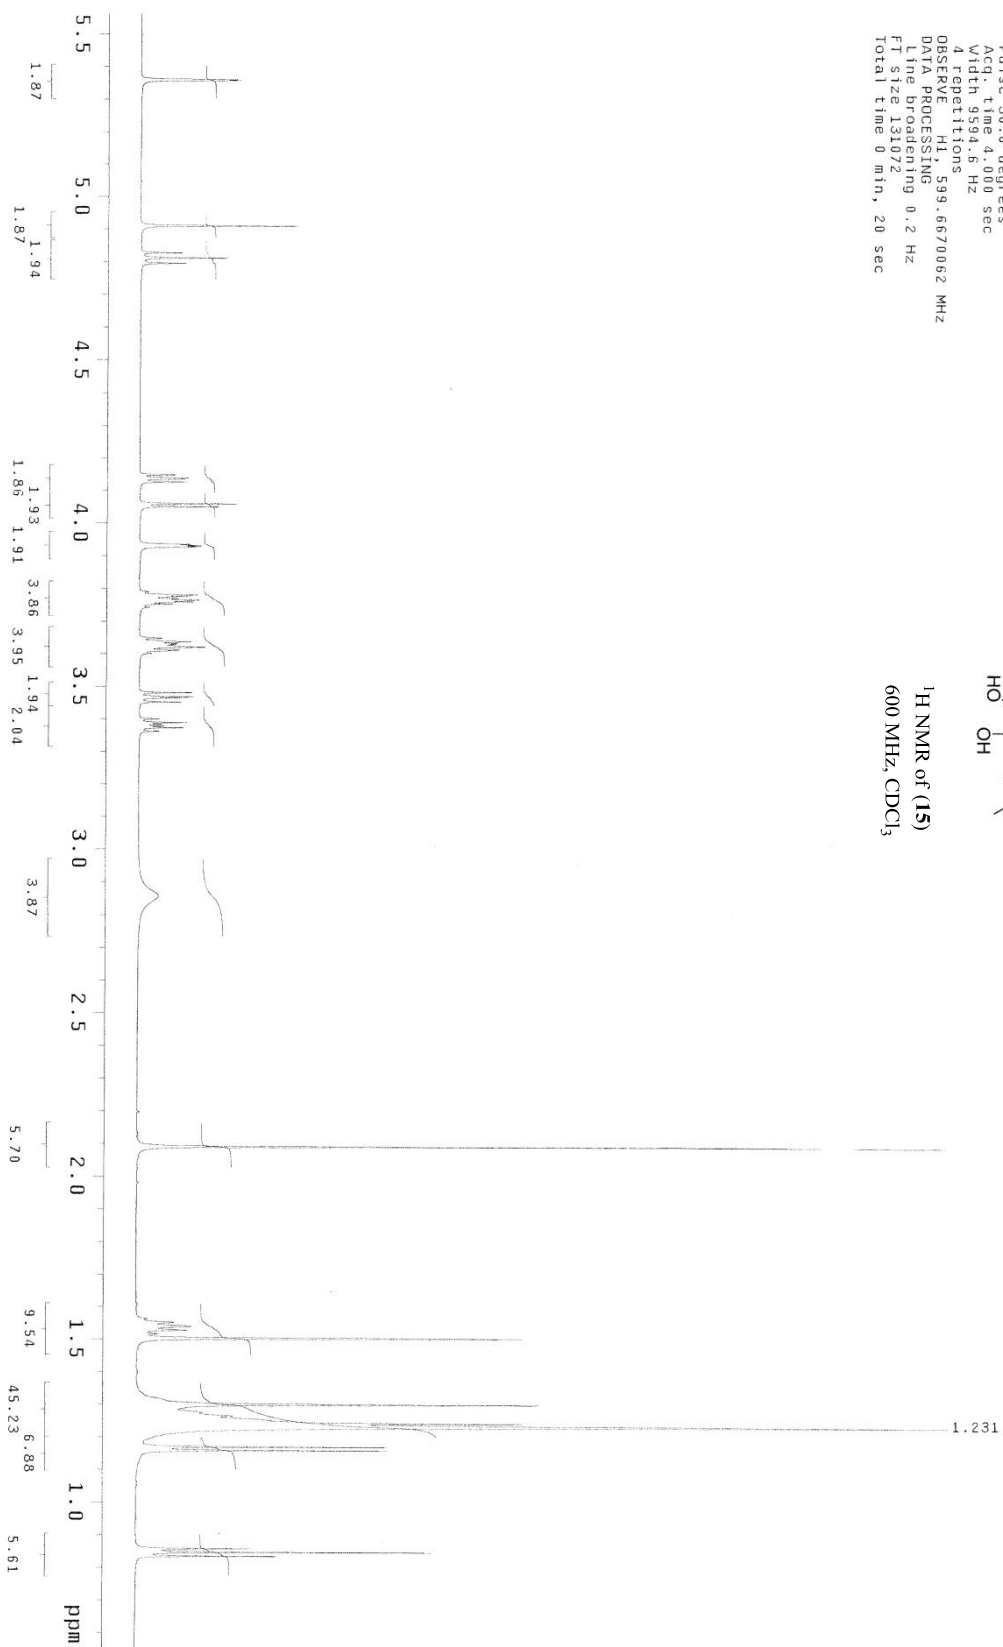

STANDARD CARBON PARAMETERS

Pulse Sequence: szpu1  
 Solvent: CDCl3  
 Temp: 28.0 C / 301.1 K  
 User: 1-14-87  
 INOVA-600 "inova600"

Relax. delay: 0.500 sec  
 Pulse: 23.51 degrees  
 Width: 10000 Hz  
 48 Repetitions  
 OBSERVE C13: 150.7863867 MHz  
 DECOUPLE H1: 599.6700024 MHz  
 Power: 40 dB  
 continuously on  
 WALTZ-16 modulated  
 DATA PROCESSING  
 Line broadening: 1.0 Hz  
 FT size: 131072  
 Total time: 32 min, 34 sec

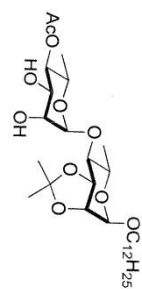

<sup>13</sup>C NMR of (15)  
 150 MHz, CDCl<sub>3</sub>

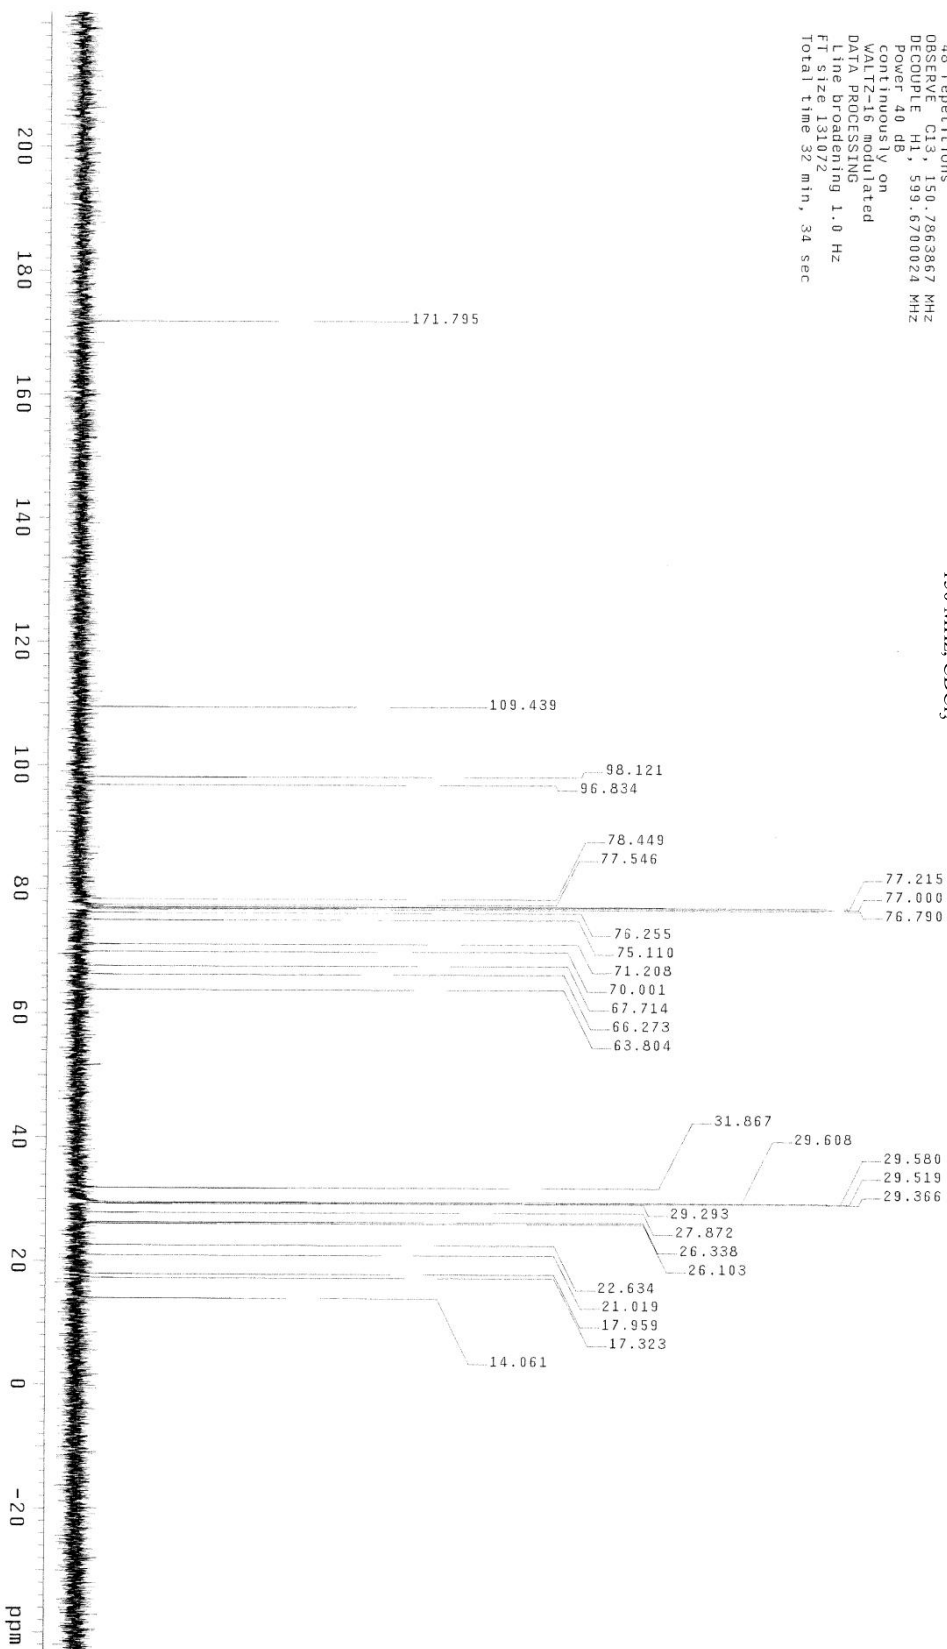

STANDARD PROTON PARAMETERS

Archive directory: /export/home/vnmr1/vnmr-sys/data  
 Sample directory:

Pulse Sequence: szpul

Solvent: CDCl3  
 Temp: 28.0 C / 301.1 K  
 File: tricyclo-pd-top  
 INOVA-600 "hmr"

Relax. delay 1.000 sec  
 Pulse 30.0 degrees  
 Acq. time 4.000 sec  
 Width 9594.6 Hz  
 4 repetitions  
 OBSERVE H1, 599.6670084 MHz  
 DATA PROCESSING  
 Line broadening 0.2 Hz  
 FT size 131072  
 Total time 0 min, 20 sec

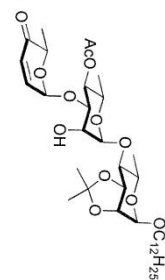

<sup>1</sup>H NMR of (16)  
 600 MHz CDCl<sub>3</sub>

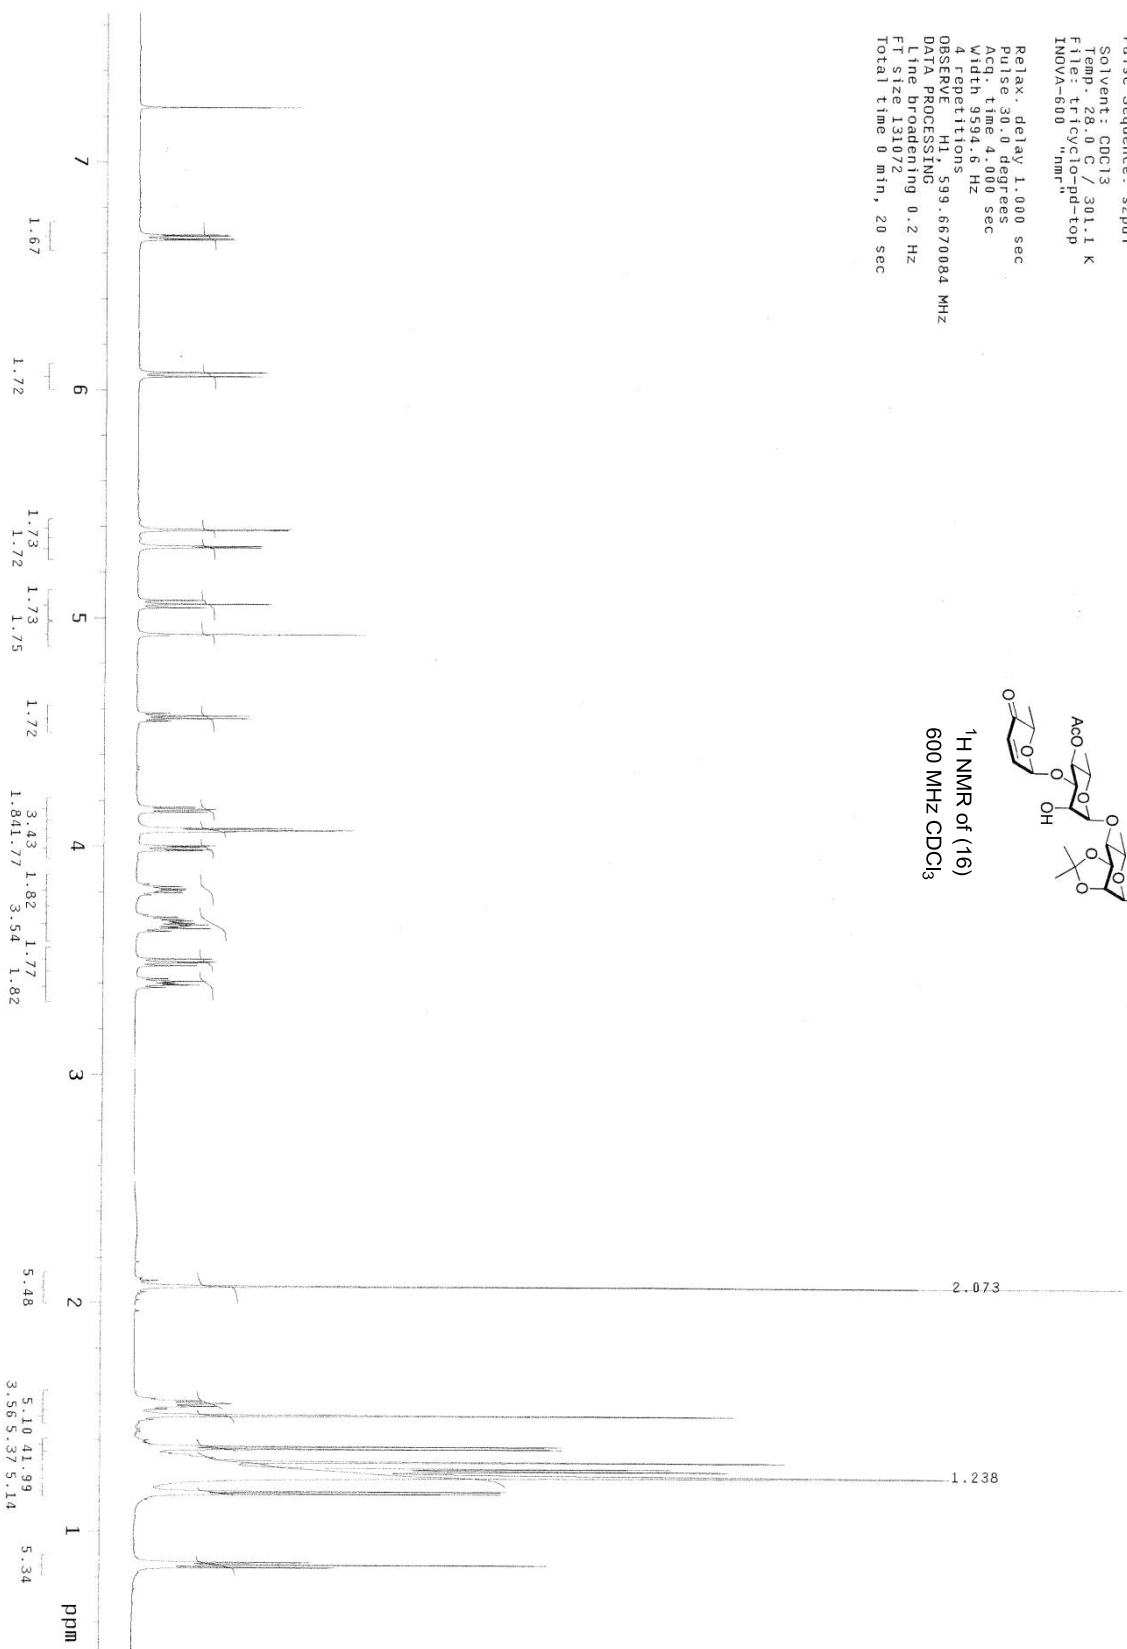

STANDARD CARBON PARAMETERS

Pulse Sequence: s2pul  
 Solvent: CDCl3  
 Temp: 28.0 C / 301.1 K  
 User: I-14-87  
 File: tricyclo-pd-less-C  
 INOVA-600 "nmr"

Relax. delay 0.500 sec  
 pulse 29.91 degrees  
 Acq. time 1.400 sec  
 Width 40000.0 Hz  
 1856 repetitions  
 OBSERVE C13, 150.7863855 MHz  
 DECOUPLE H1, 599.6700024 MHz  
 Power 40 db  
 continuously on  
 VALTZ-16 modulated  
 DATA PROCESSING  
 Line broadening 1.0 Hz  
 FT size 131072  
 Total time 530 hr, 15 min, 3 sec

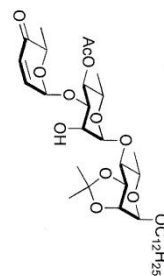

<sup>13</sup>C NMR of (16)  
 150 MHz CDCl<sub>3</sub>

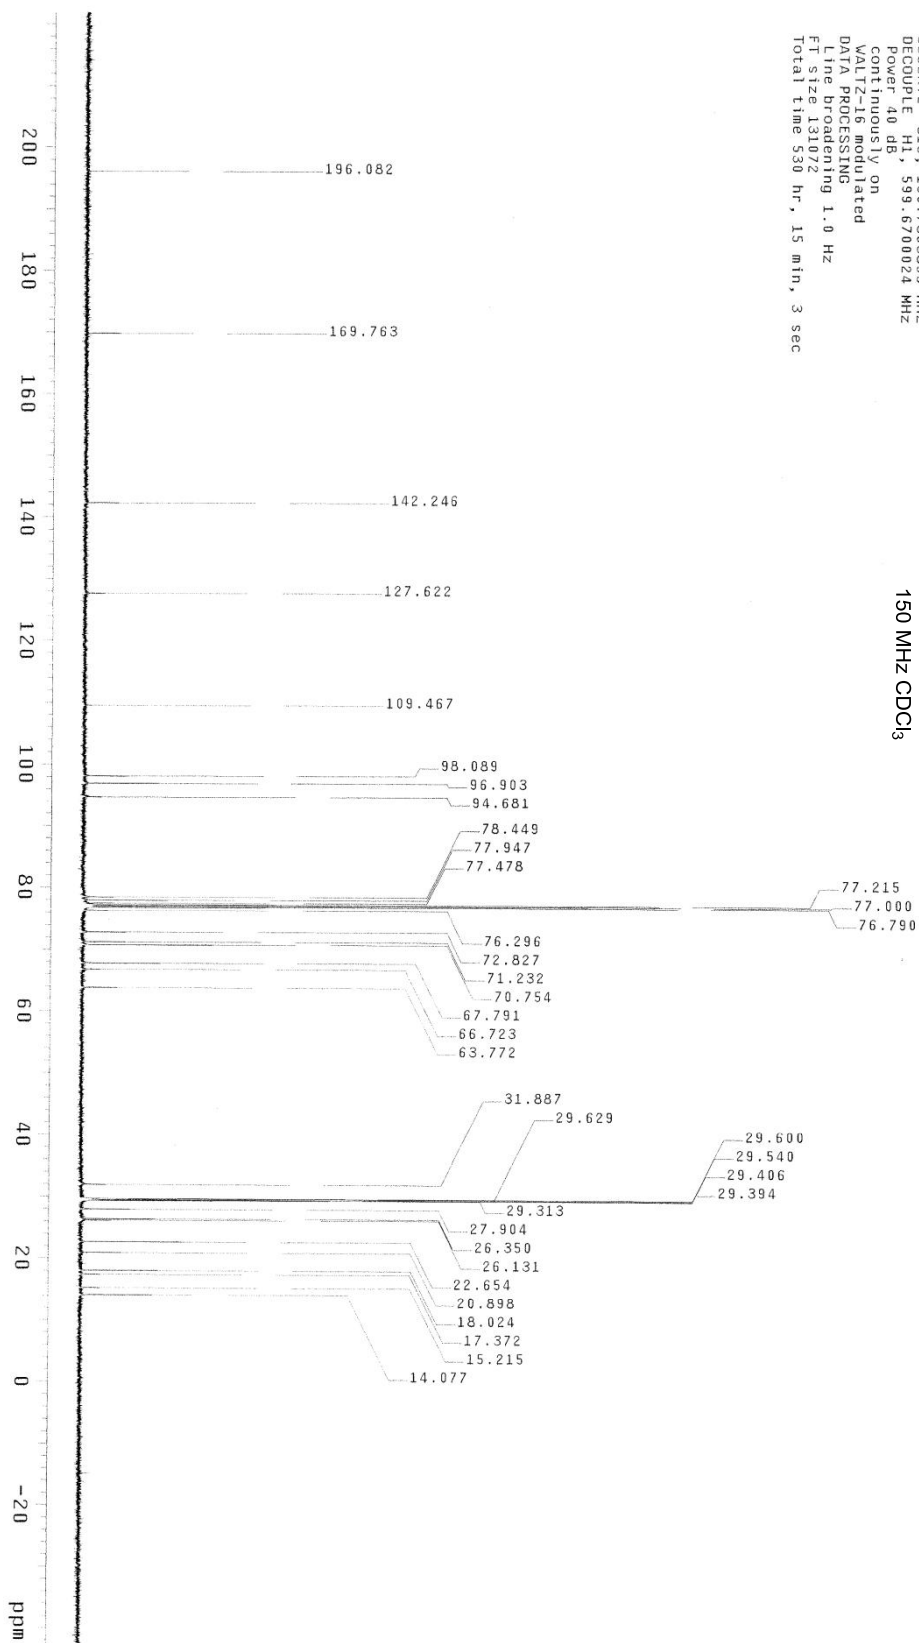

STANDARD PROTON PARAMETERS

Archive directory: /export/home/vnmr1/vnmr5ys/data  
Sample directory:  
File: PROTON

Pulse Sequence: s2pu1

Solvent: CDCl3  
Temp: 28.0 C / 301.1 K  
INOVA-600 "inova600"

Relax. delay 1.000 sec  
Pulse 30.0 degrees  
Acq. time 4.000 sec  
Width 9594.6 Hz  
Single scan  
OBSERVE H1, 599.6670085 MHz  
DATA PROCESSING  
Line broadening 0.2 Hz  
FT size 131072  
Total time 0 min, 5 sec

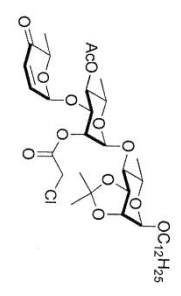

<sup>1</sup>H NMR of (17)  
600 MHz, CDCl<sub>3</sub>

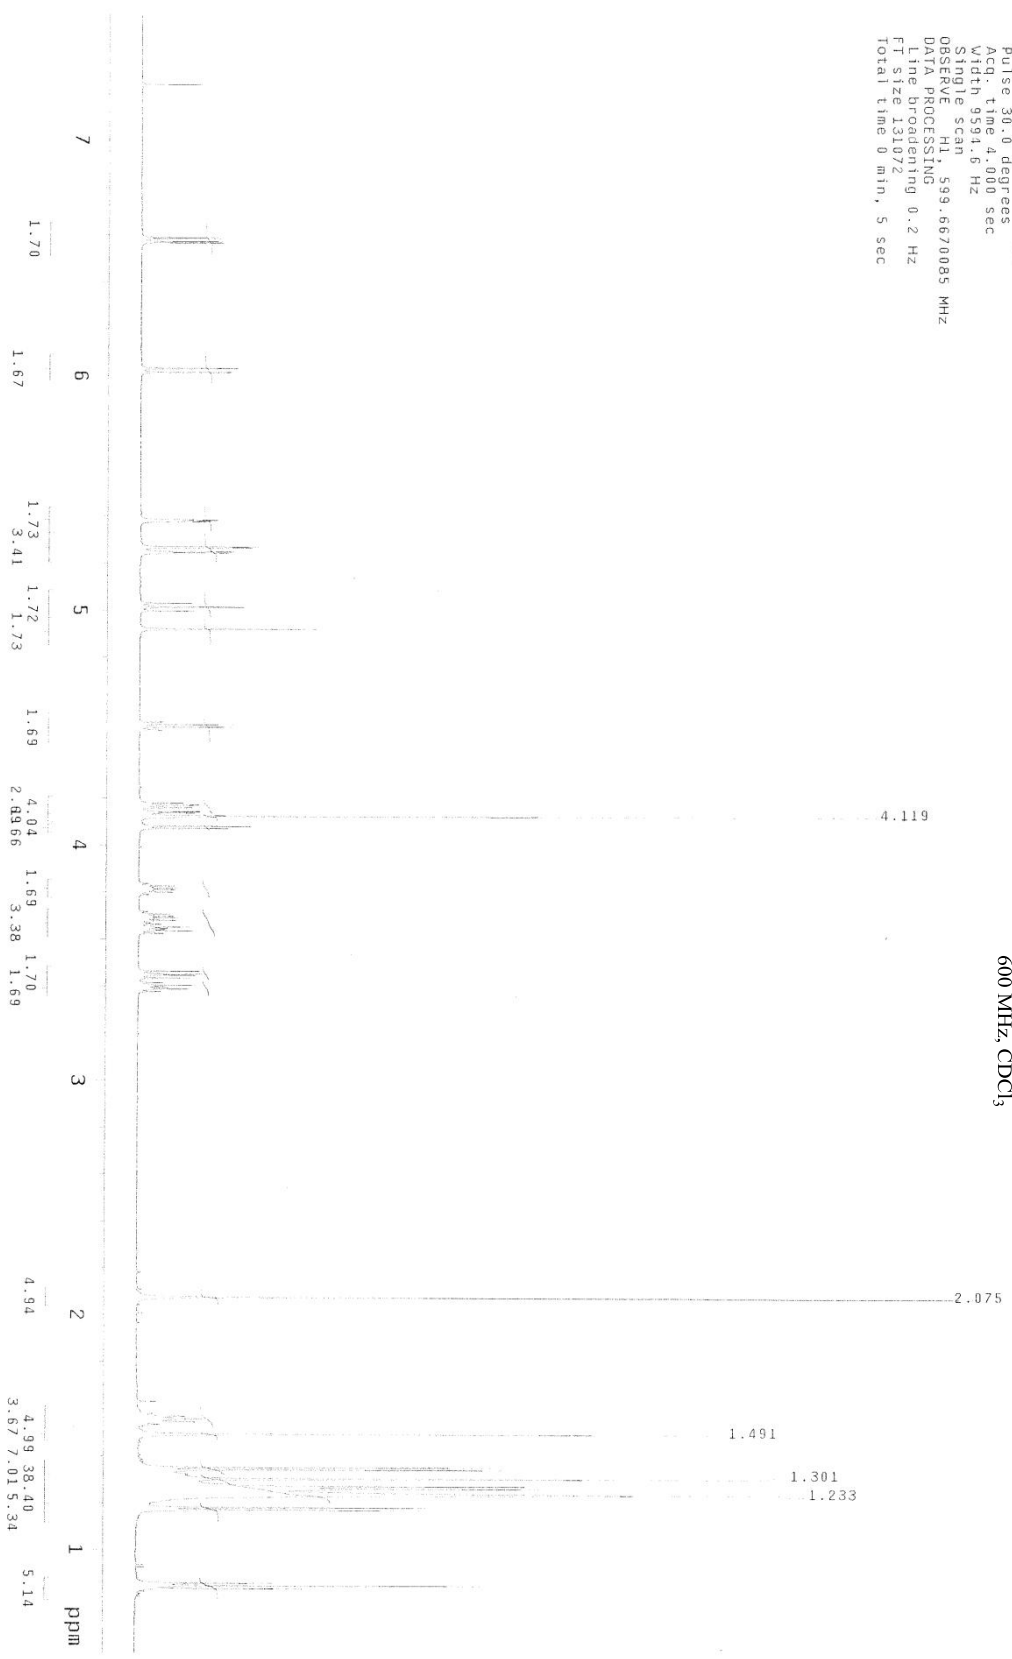

STANDARD CARBON PARAMETERS

Pulse Sequence: s2pul  
 Solvent: CDCl3  
 Temp: 28.0 C / 301.1 K  
 User: j-11-87  
 INOVA-600 "inova600"  
 Relax. delay 0.500 sec  
 Pulse 29.9 degrees  
 Acq. time 1.400 sec  
 Width 40000.0 Hz  
 K  
 Acquisition  
 OBSERVE C13, 100.7858373 MHz  
 DECODE H1, 599.870024 MHz  
 PULPROG zgpg30  
 CONTINUOUSLY on  
 WALTZ-16 modulated  
 DATA PROCESSING  
 Line broadening 1.0 Hz  
 FT size 131072  
 Total time 32 min, 34 sec

<sup>13</sup>C NMR of (17)  
 150 MHz, CDCl<sub>3</sub>

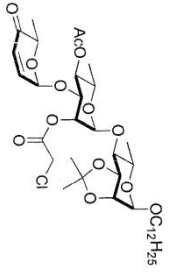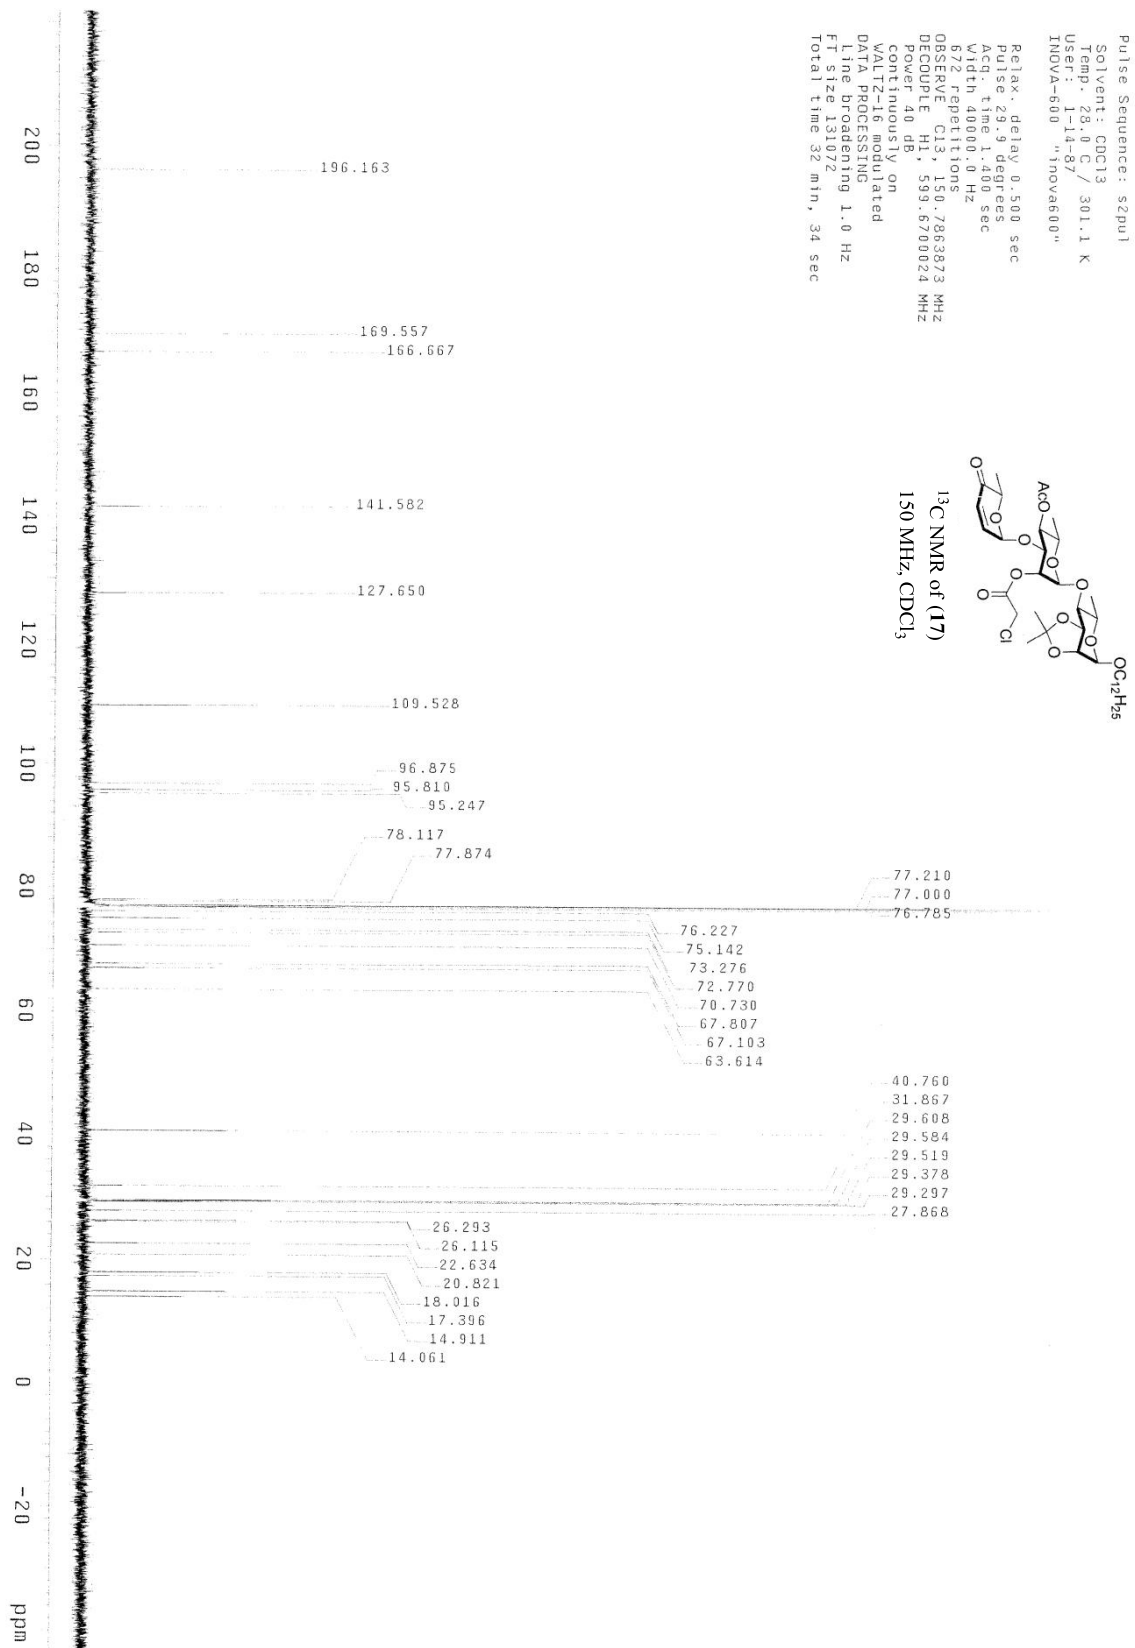

STANDARD PROTON PARAMETERS

Archive directory: /export/home/vnmr1/vnmrSYS/data  
 Sample directory:

Pulse Sequence: szpu1

Solvent: CDCl3

Temp: 28.0 C / 301.1 K

File: 020409-1H

INOVA-600 "nmr"

Relax. delay: 1.000 sec

Pulse: 30.0 degrees

Acq. time: 4.000 sec

Width: 3594.6 Hz

OSERVE scan: 599.6670079 MHz

DATA PROCESSING

FT size: 131072

Total time: 0 min, 5 sec

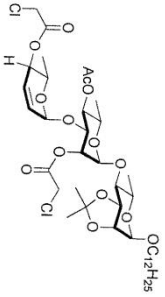

<sup>1</sup>H NMR of (G)  
 600 MHz, CDCl<sub>3</sub>

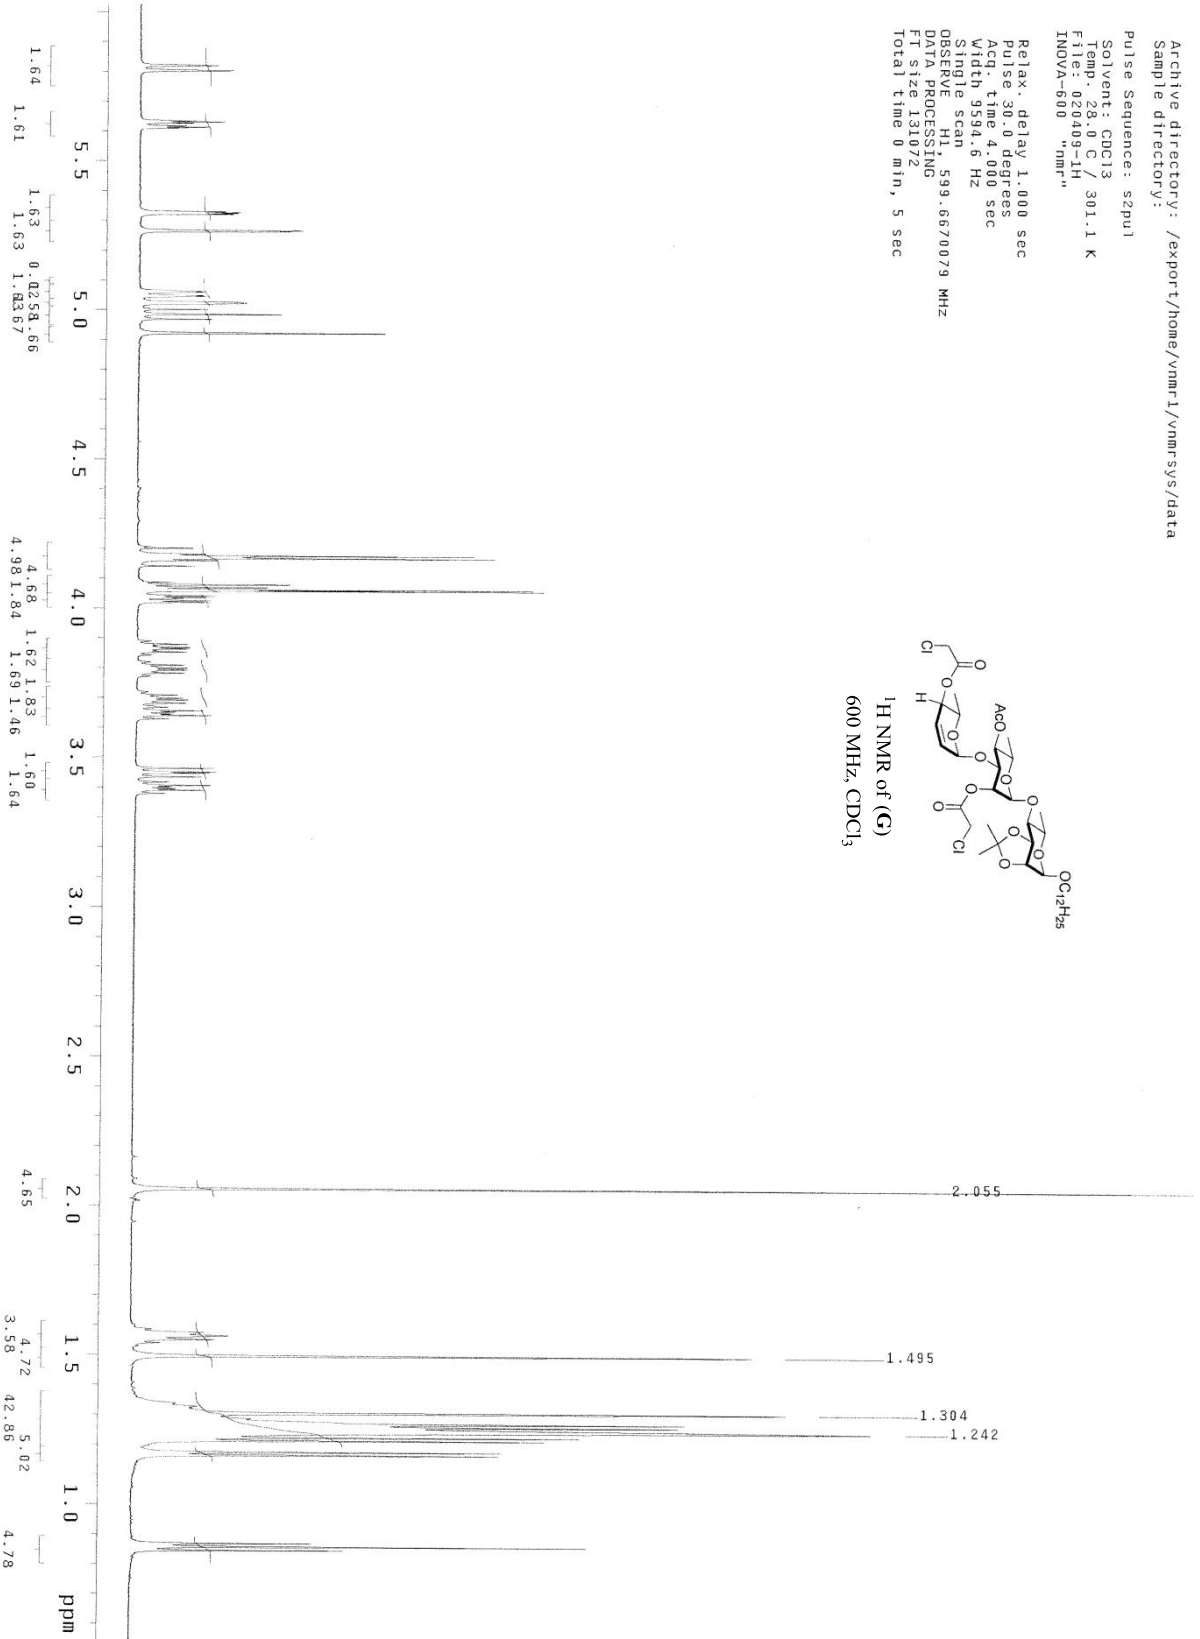



STANDARD CARBON PARAMETERS

Pulse Sequence: s2pul

Solvent: CDCl<sub>3</sub>

Temp: 28.0 C / 301.1 K

User: 1-14-87

INOVA-600 "nmr"

Relax. delay: 0.500 sec

Pulse: 29.9 degrees

Acq. time: 1.400 sec

Width: 35003.6 Hz

64 repetitions

OBSERVE: C13, 150.7863852 MHz

DECOUPLE: H1, 599.6700024 MHz

Power: 40 dB

continuously on

WALTZ-16 modulated

DATA PROCESSING

Line broadening: 1.0 Hz

FT size: 131072

Total time: 32 min, 34 sec

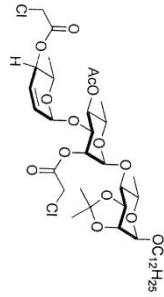

$^{13}\text{C}$  NMR of (G)  
150 MHz, CDCl<sub>3</sub>

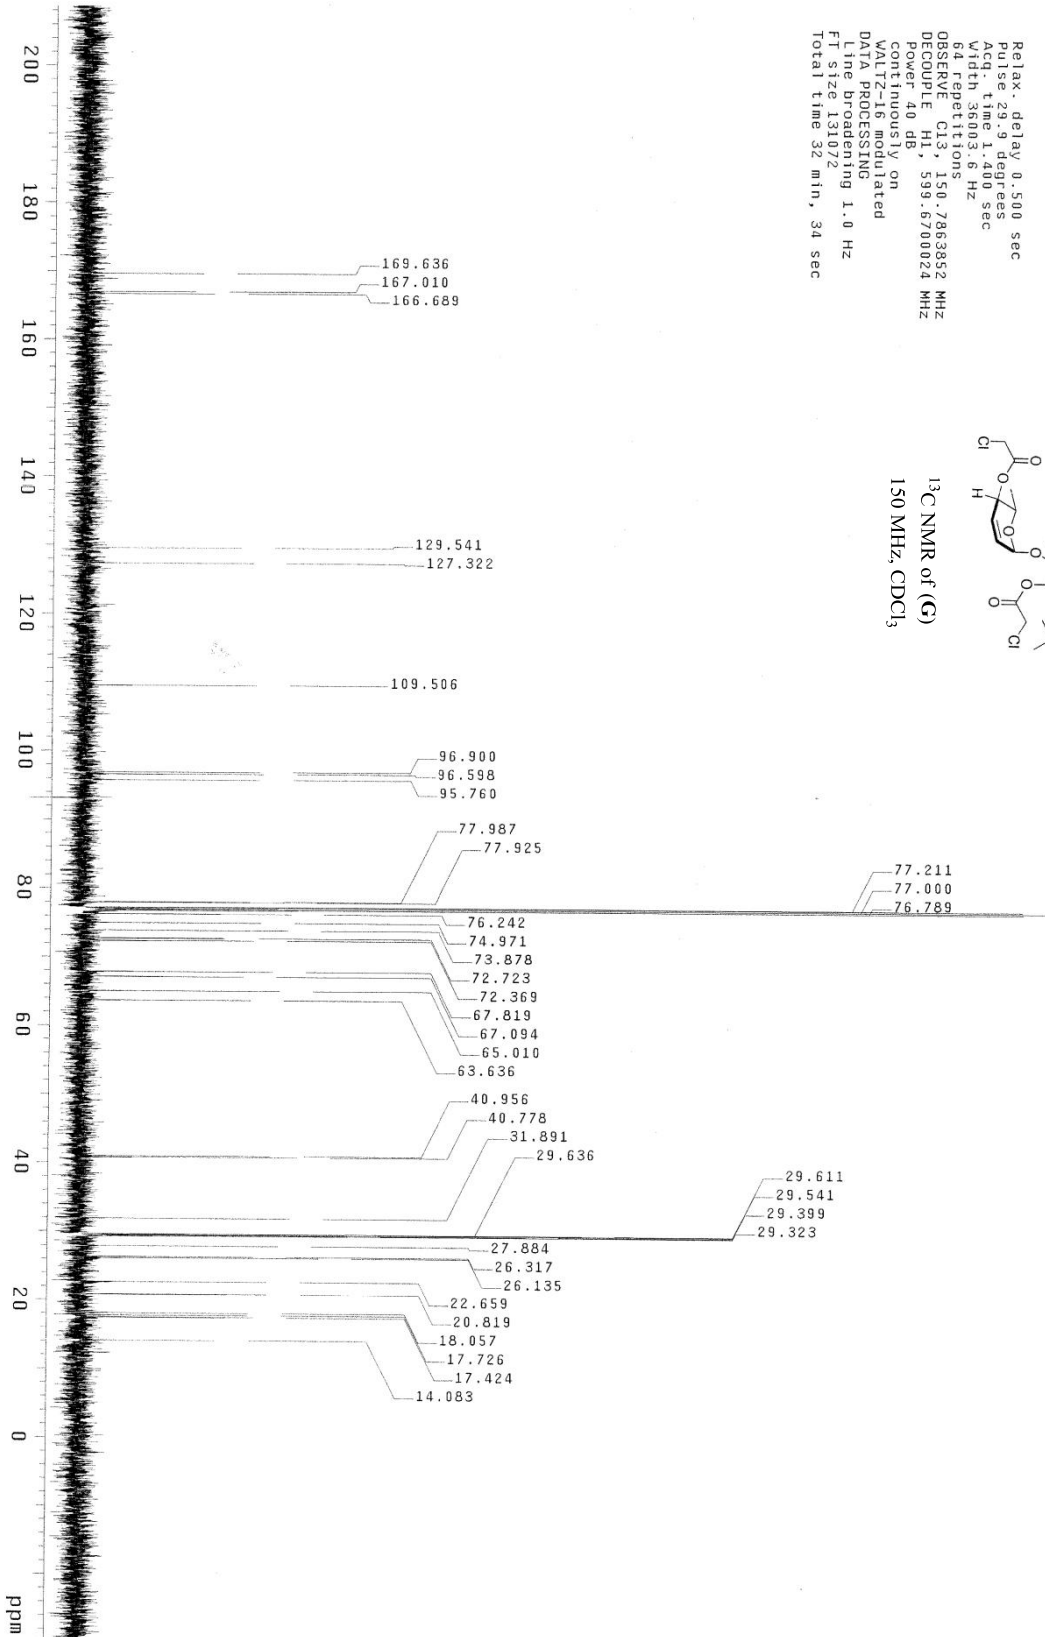

STANDARD PROTON PARAMETERS

Archive directory: /export/home/vmr1/vmr/sys/data  
 Sample directory:

Pulse Sequence: s2pul

Solvent: CDCl3  
 Temp: 28.0 C / 301.1 K  
 F1 file: 020609-1H  
 INOVA-600 "nmr"

Relax. delay: 1.000 sec  
 Pulse: 30.0 degrees  
 Acq. time: 4.000 sec  
 Width: 9594.6 Hz  
 Single scan  
 OBSERVE: H1, 599.6670071 MHz  
 DATA PROCESSING  
 Line broadening: 0.2 Hz  
 FT size: 131072  
 Total time: 0 min, 5 sec

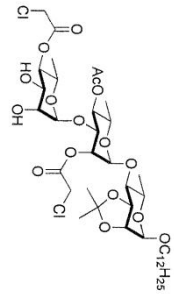

<sup>1</sup>H NMR of (18)  
 600 MHz, CDCl<sub>3</sub>

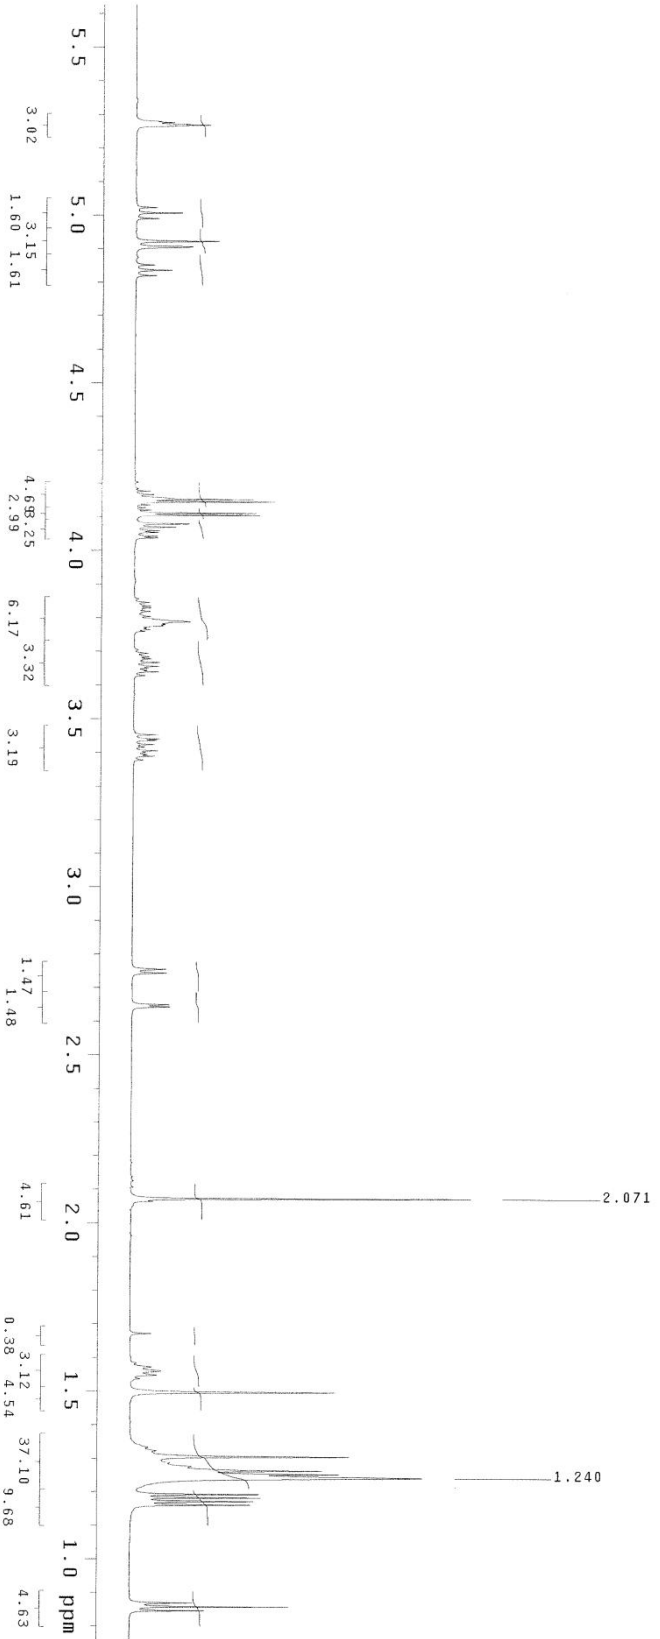

STANDARD CARBON PARAMETERS

Pulse Sequence: s2pul  
 Solvent: CDCl3  
 Temp: 28.0 C / 301.1 K  
 User: 1-14-87  
 INOVA-600 "inova600"

Relax. delay 0.500 sec  
 Pulse 29.9 degrees  
 Acq. time 1.400 sec  
 Width 36003.6 Hz  
 336 repetitions  
 OBSERVE C13, 150.7863852 MHz  
 DECOUPLE H1, 599.6700024 MHz  
 Power 40 dB  
 continuously on  
 VOLT-16 modulated  
 DATA PROCESSING  
 Line broadening 1.0 Hz  
 FT size 131072  
 Total time 32 min, 34 sec

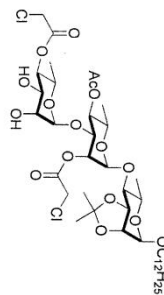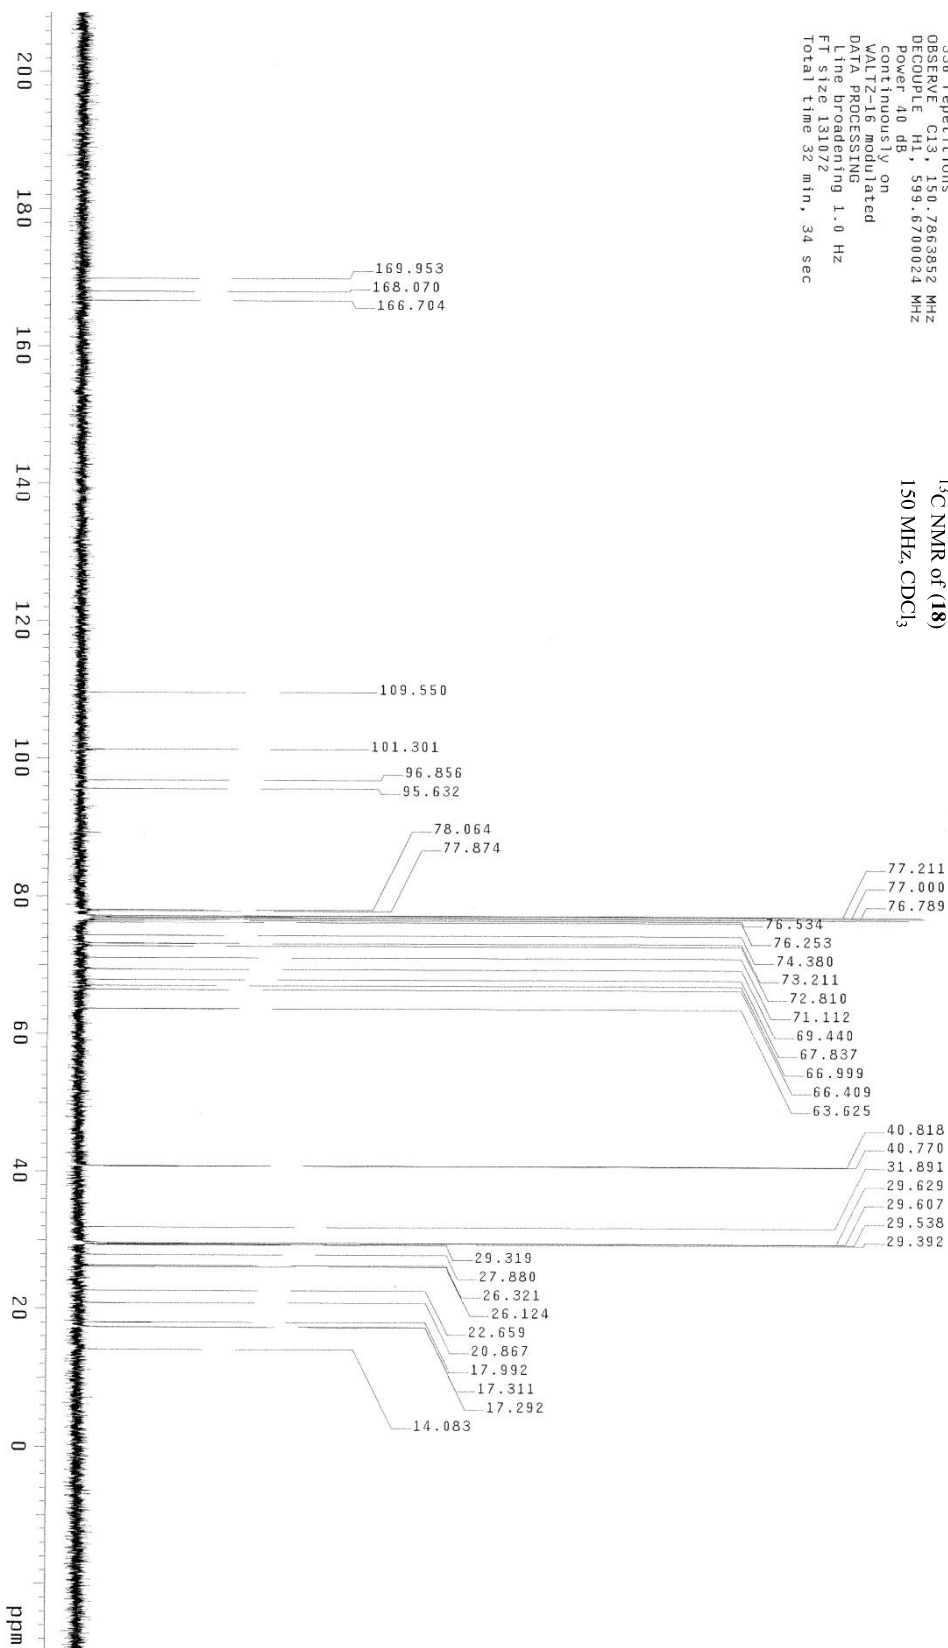

STANDARD PROTON PARAMETERS

Archive directory: /export/home/vnmr-1/vnmr-sys/data  
Sample directory:

Pulse Sequence: szpul1

Solvent: CDCl3

Temp: 28.0 C / 301.1 K

File: 020909-1H

INOVA-600 "nmr"

Relax. delay 1.000 sec

Pulse: 30.0 degrees

Width: 959.600 sec

4 repetitions

ORSERVE: H1 599.6670079 MHz

DATA PROCESSING

Line broadening 0.2 Hz

FT size 131072

Total time 0 min, 20 sec

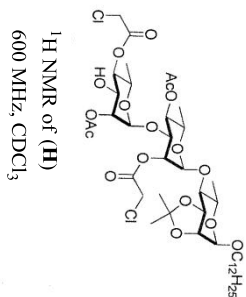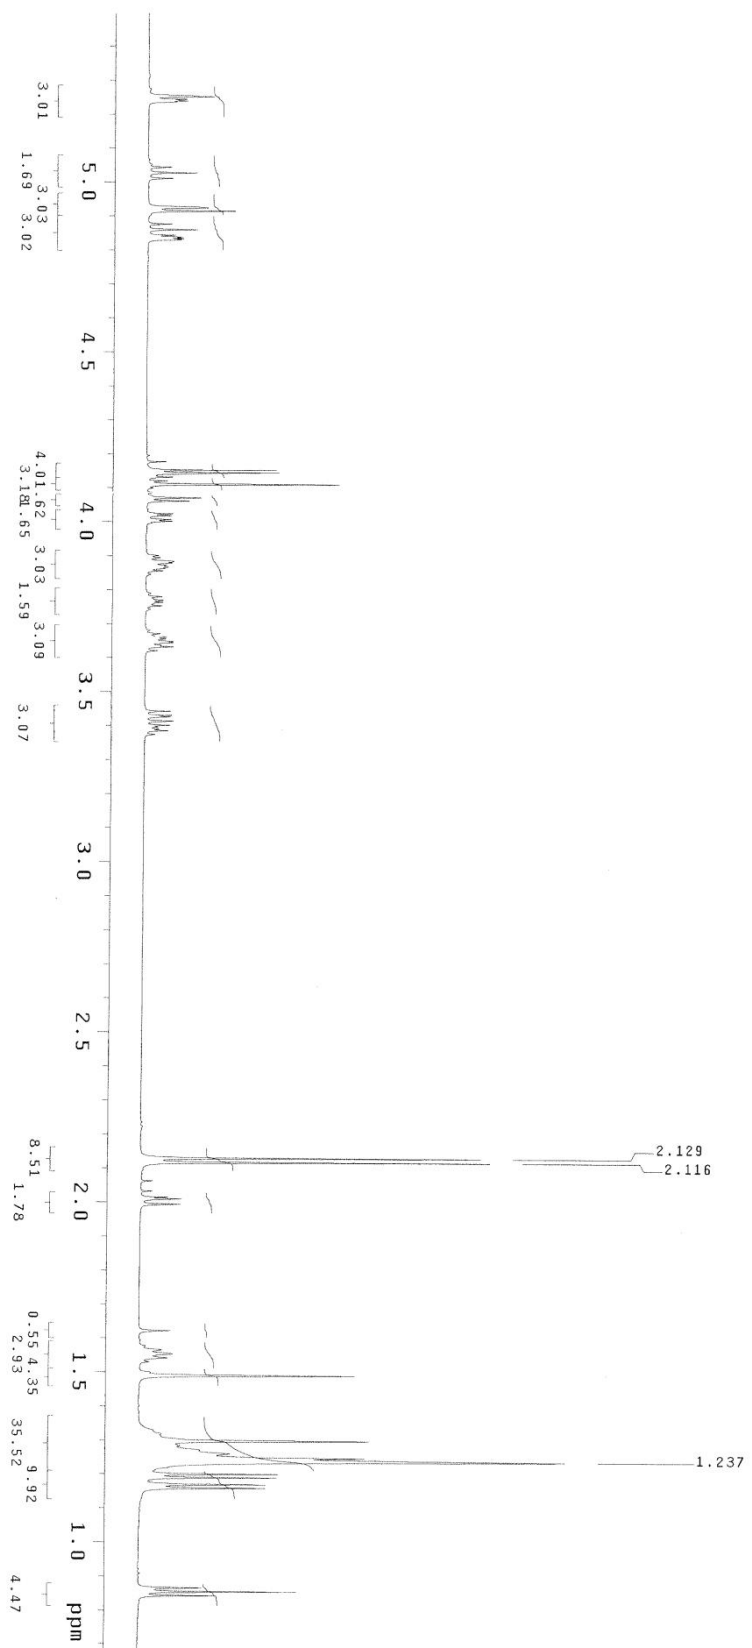

STANDARD CARBON PARAMETERS

Pulse Sequence: s2pu1  
 Solvent: CDCl3  
 Temp: 28.0 C / 301.1 K  
 User: 11-14-07  
 Inova-800 "nmr"  
 Relax. delay 0.500 sec  
 Pulse 29.9 degrees  
 Acq. time 1.400 sec  
 Width 36003.6 Hz  
 1/40 repetitions  
 OBSERVED C13, 150.7863857 MHz  
 DECODE C13, 599.6780024 MHz  
 PWDW 1.0 Hz  
 CONTINUOUSLY ON  
 VALTZ-16 modulated  
 DATA PROCESSING  
 Line broadening 1.0 Hz  
 FT size 131072  
 Total time 47133 hr, 24 min, 0 sec

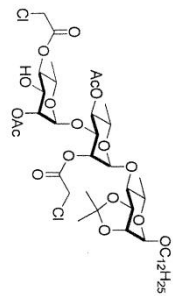

$^{13}\text{C}$  NMR of (H)  
 150 MHz, CDCl<sub>3</sub>

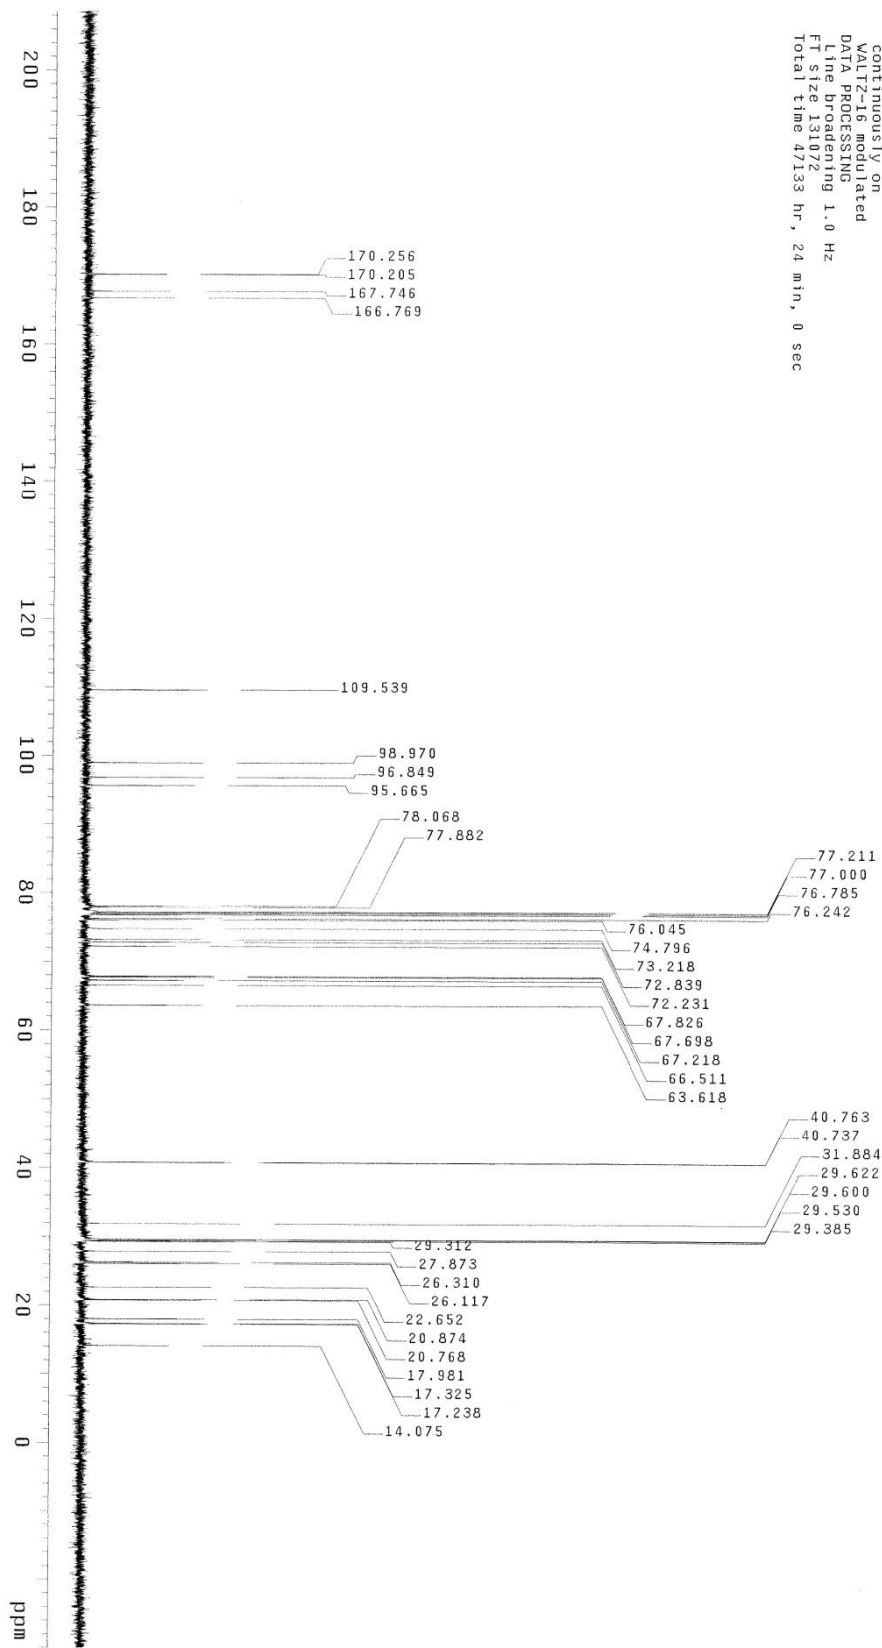

STANDARD PROTON PARAMETERS

Archive directory: /export/home/vnmr1/vnmr.sys/data  
 Sample directory:  
 File: PROTON

Pulse Sequence: szpul  
 Solvent: CDCl3  
 Temp: 28.0 C / 301.1 K  
 INOVA-600 <sup>1</sup>H INOVA600

Relax. delay 1.000 sec  
 Pulse 30.0 degrees  
 Acq. time 4.000 sec  
 Width 9594.6 Hz  
 4 repetitions  
 OBSERVE H1 599.6670076 MHz  
 DATA PROCESSING  
 Line broadening 0.2 Hz  
 FT size 131072  
 Total time 0 min, 20 sec

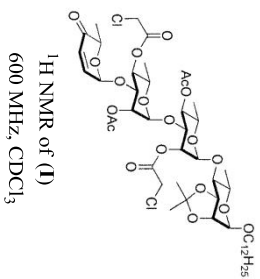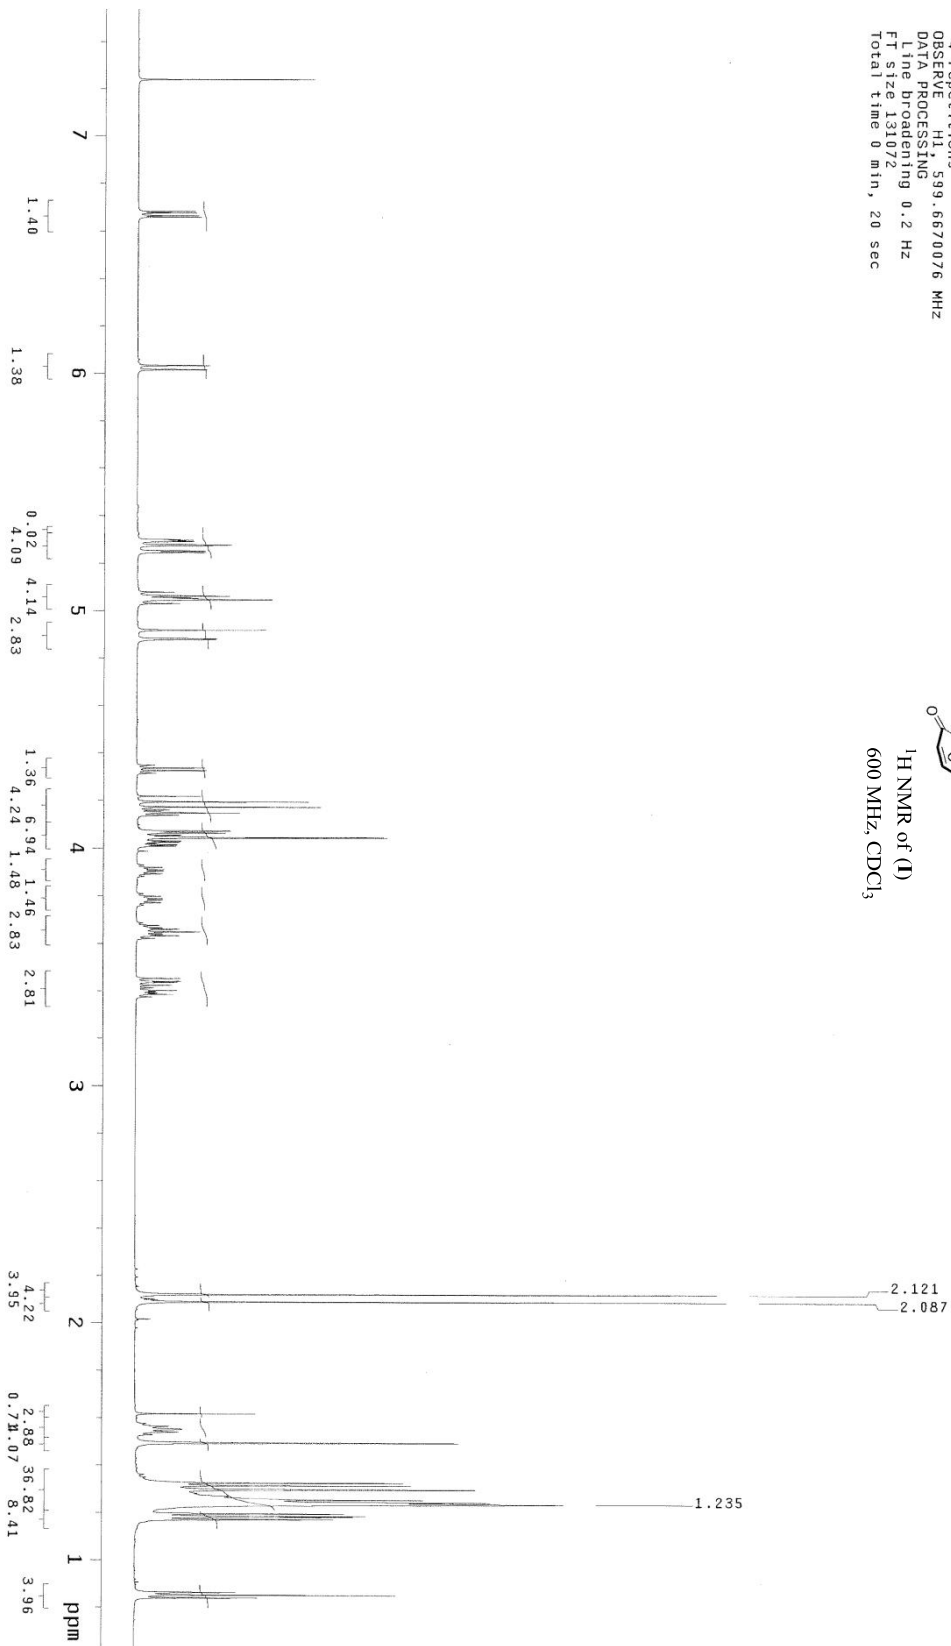

STANDARD CARBON PARAMETERS

Pulse Sequence: szpu1  
 Solvent: CDCl3  
 Temp: 23.0 C / 301.1 K  
 User: 1-14-97  
 INOVA-600 "Inova600"

Relax. delay 0.500 sec  
 Pulse 29.9 degrees  
 Acq. time 1.400 sec  
 Width 36003.6 Hz  
 224 repetitions  
 OBSERVE C13, 150.7863868 MHz  
 DECOUPLE H1, 599.6700024 MHz  
 Power 40 db  
 Continuously on  
 WALTZ-16 modulated  
 DATA PROCESSING  
 Line broadening 1.0 Hz  
 FT size 13472  
 Total time 32 min, 34 sec

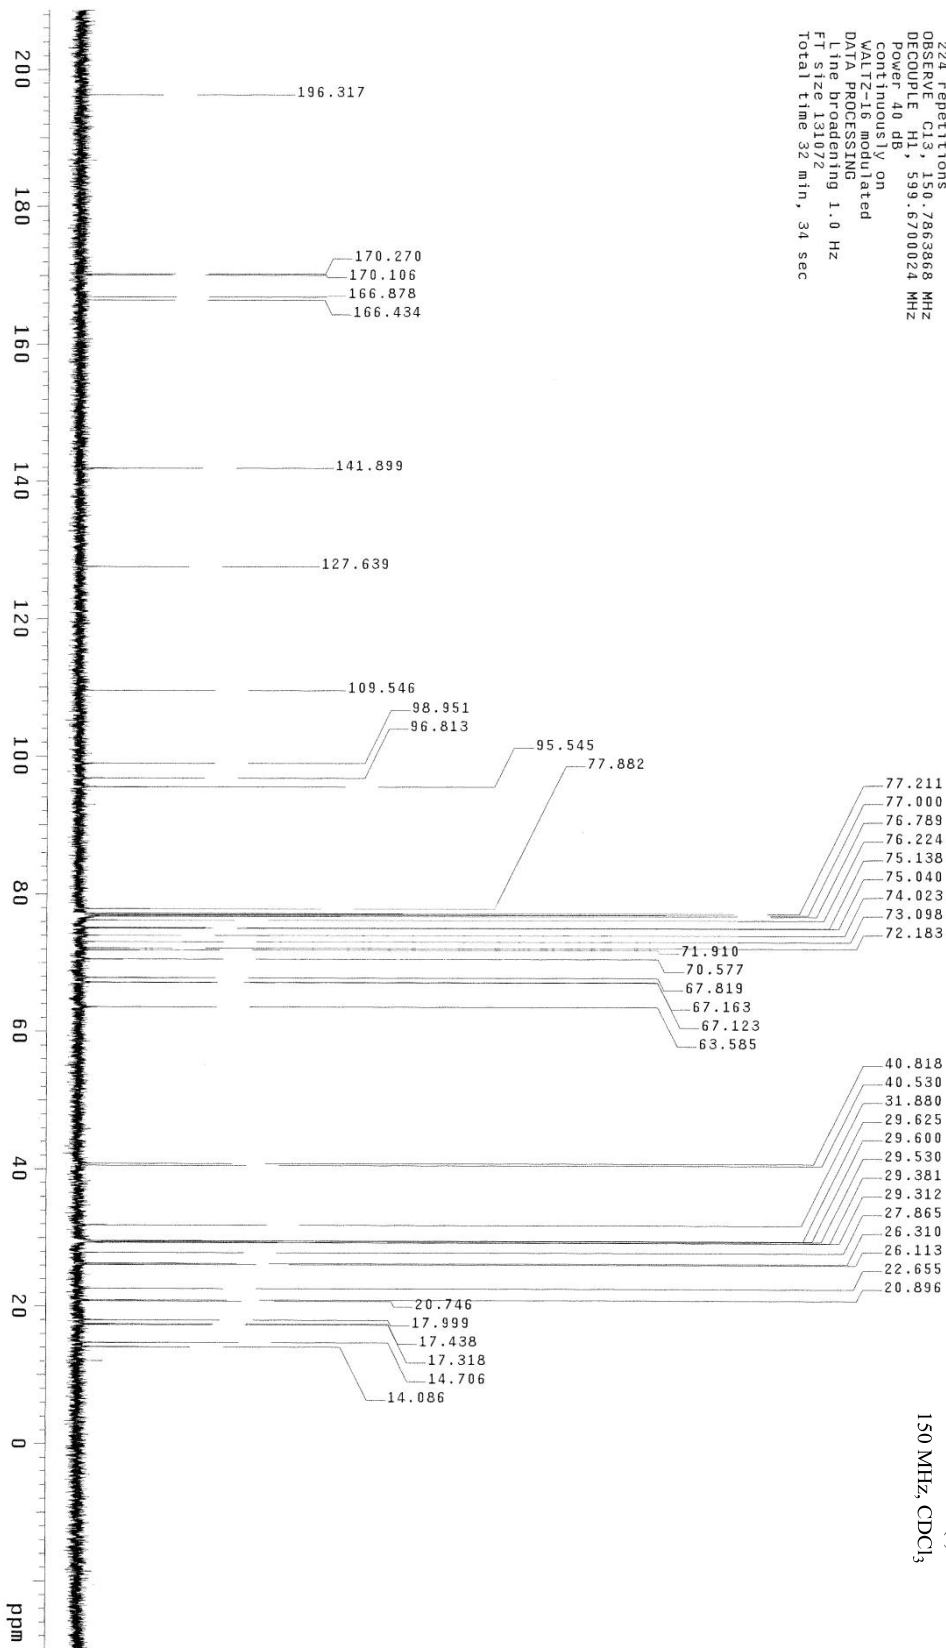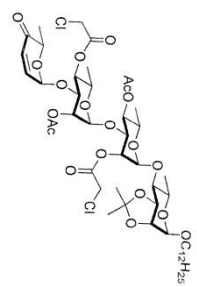

STANDARD PROTON PARAMETERS

Archive directory: /export/home/vnmr1/vnmr sys/data  
 Sample directory:

Pulse Sequence: s2pul

Solvent: CDCl<sub>3</sub>

Temp: 28.0 C / 301.1 K

F1 file: 021609-13H

INOVA-600 "nmr"

Relax. delay: 1.000 sec

Pulse: 30.0 degrees

Acq. time: 4.000 sec

Width: 9994 Hz

4. Repetitions

OBSERVE: H1, 599.6670081 MHz

DATA PROCESSING

Line broadening: 0.2 Hz

FT size: 131072

Total time: 0 min, 20 sec

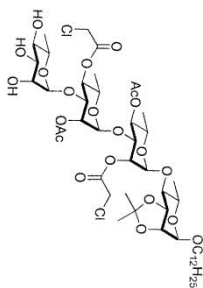

<sup>1</sup>H NMR of (20)  
 600 MHz, CDCl<sub>3</sub>

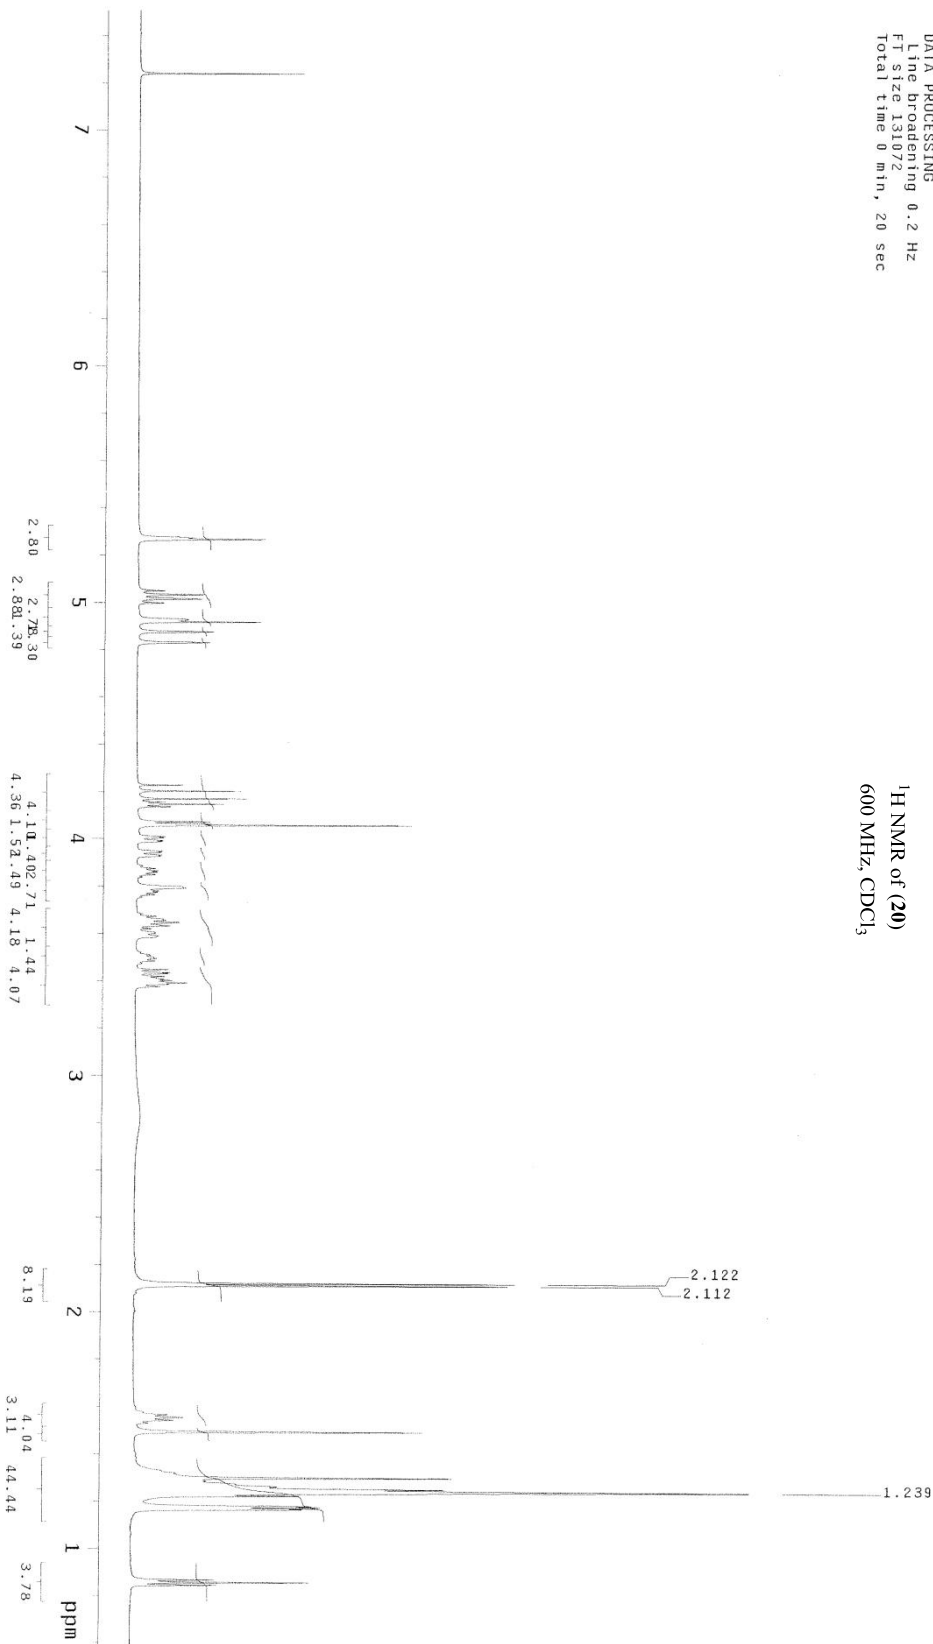



STANDARD CARBON PARAMETERS

Pulse Sequence: szpu1  
 Solvent: CDCl3  
 Temp: 28.0 C / 301.1 K  
 User: 1-14-87  
 File: 021609-13C  
 INOVA-600 "nmr"

Relax: delay 0.500 sec  
 Pulse: 23.9 degrees  
 Width: 3603.40 Hz  
 160 repetitions  
 OBSERVE: C13 150.7863846 MHz  
 DECOUPLE: H1 599.6700024 MHz  
 Power: 40 db  
 continuously on  
 WALTZ-16 modulated  
 DATA PROCESSING  
 Line broadening 1.0 Hz  
 FT size 131072  
 Total time 32 min, 34 sec

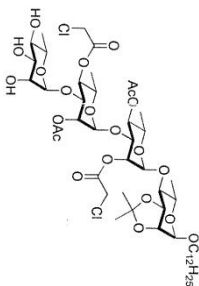

<sup>13</sup>C NMR of (20)  
 150 MHz, CDCl<sub>3</sub>

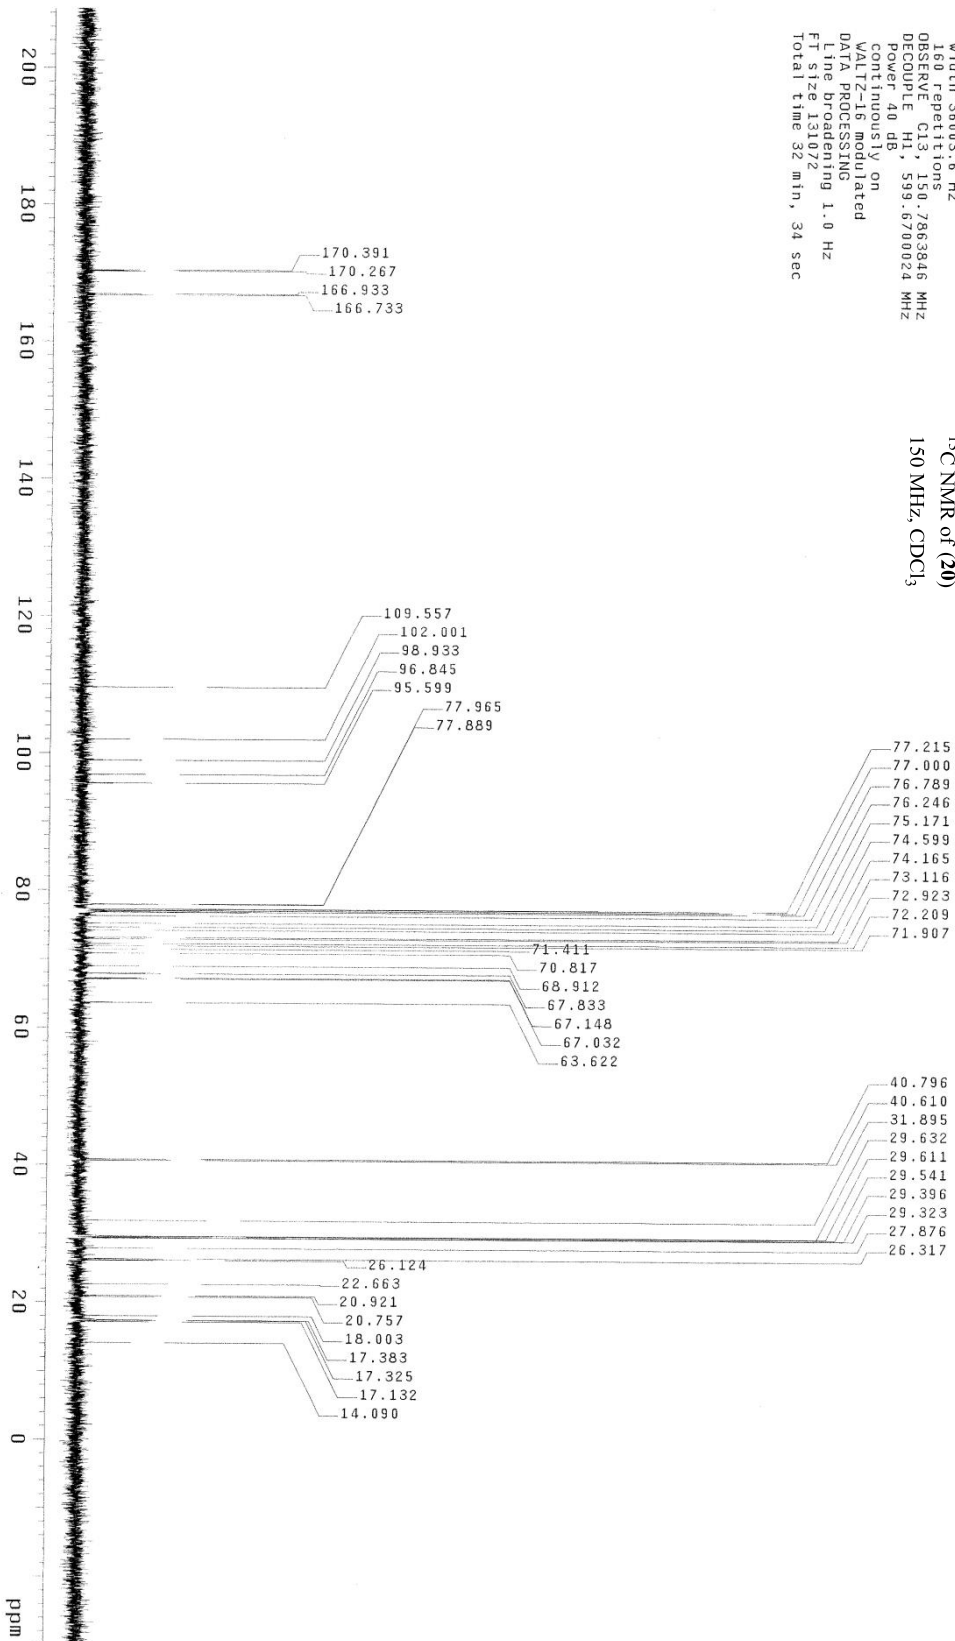

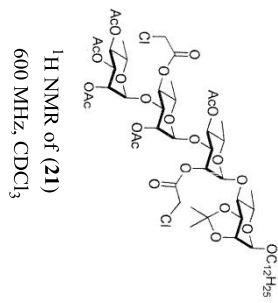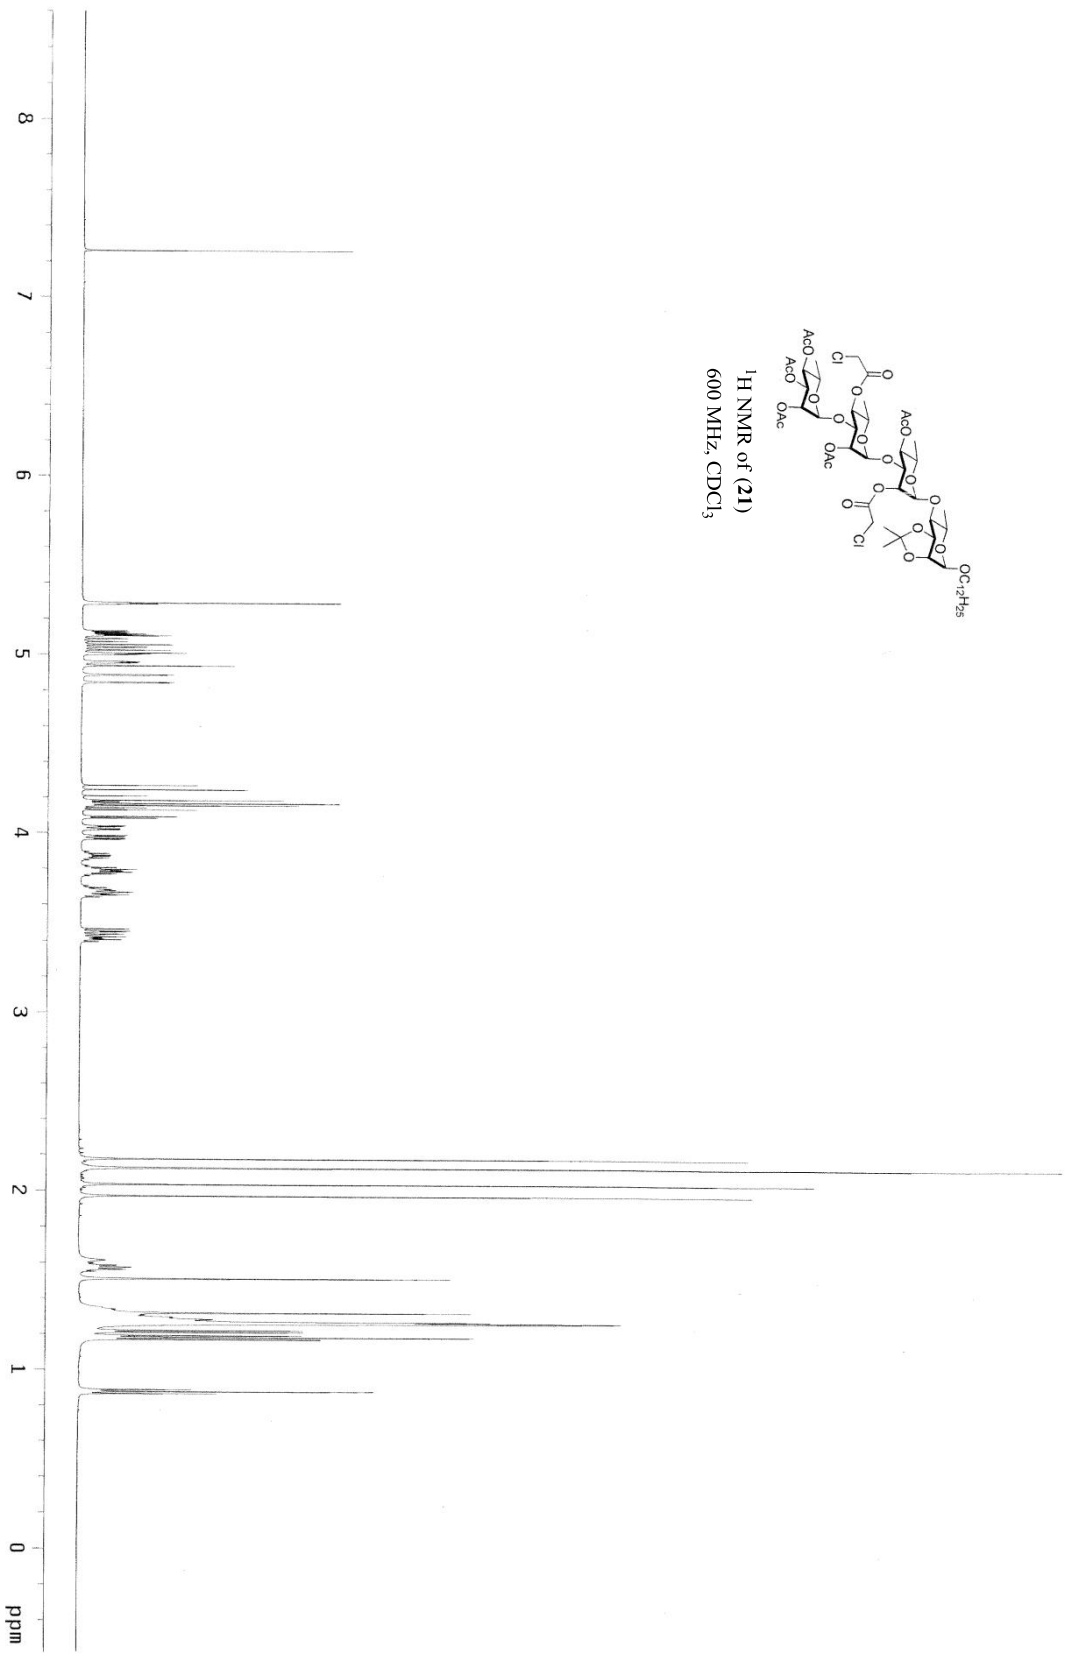

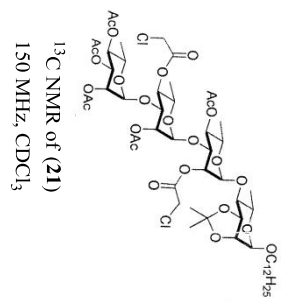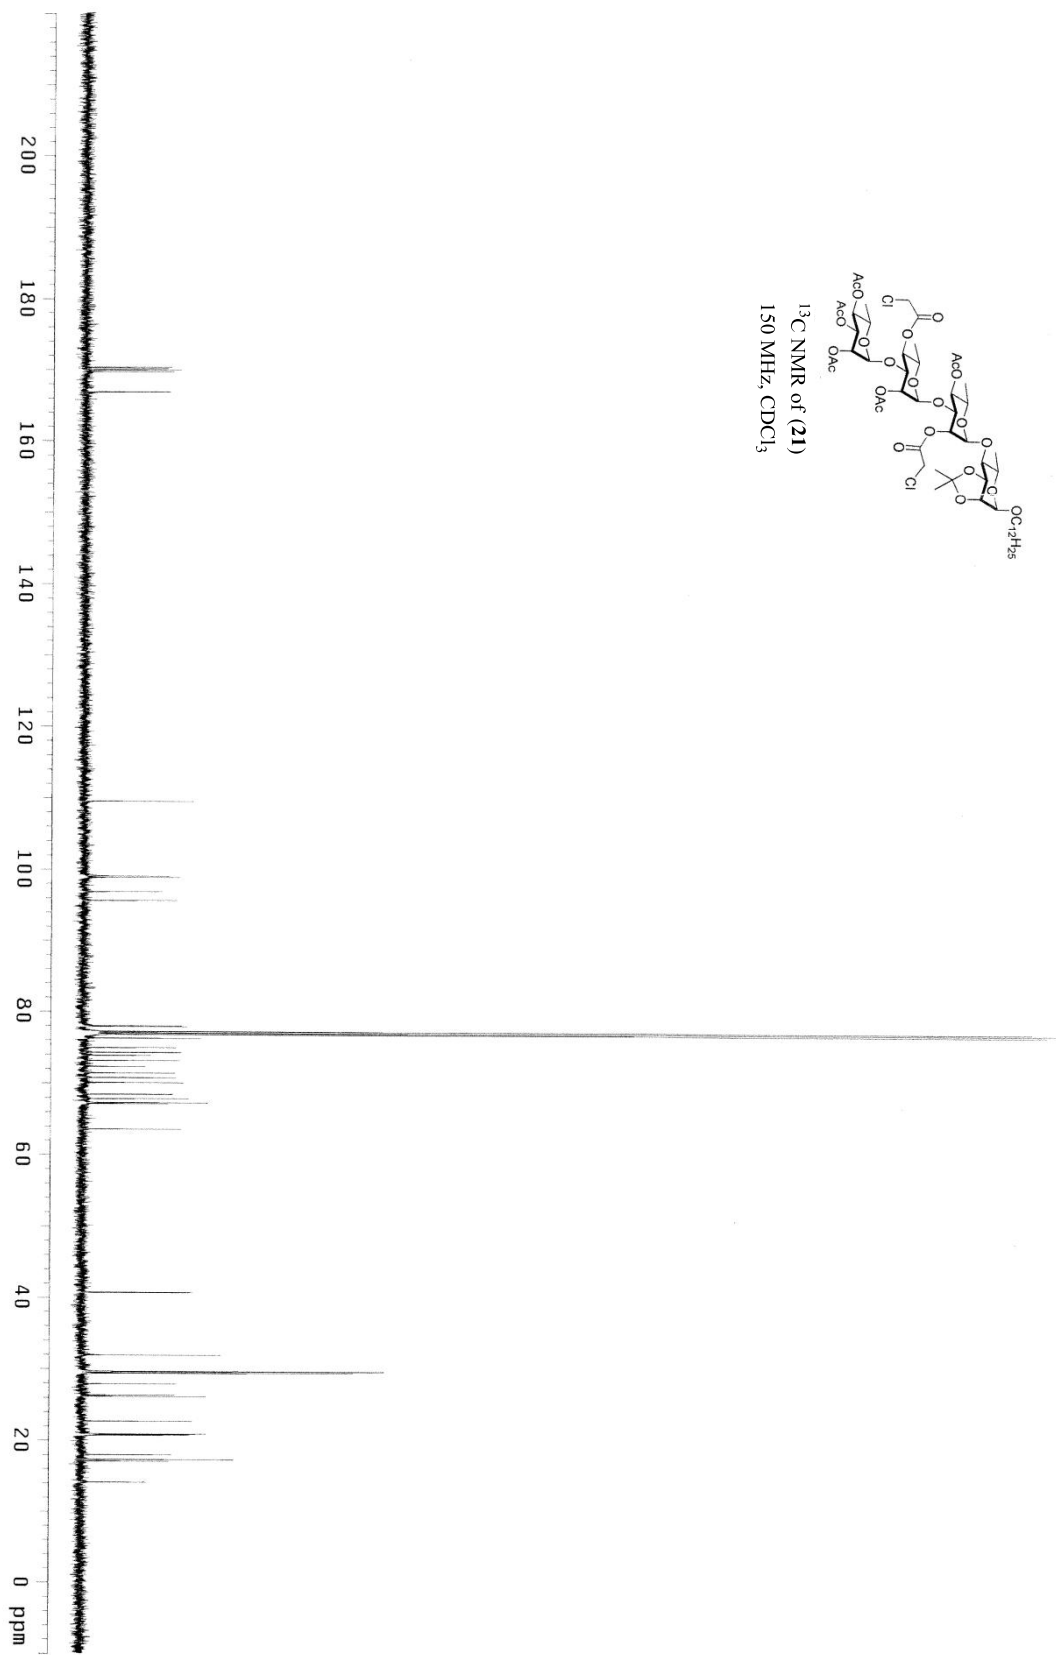

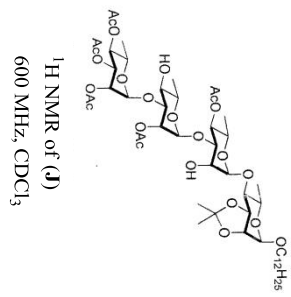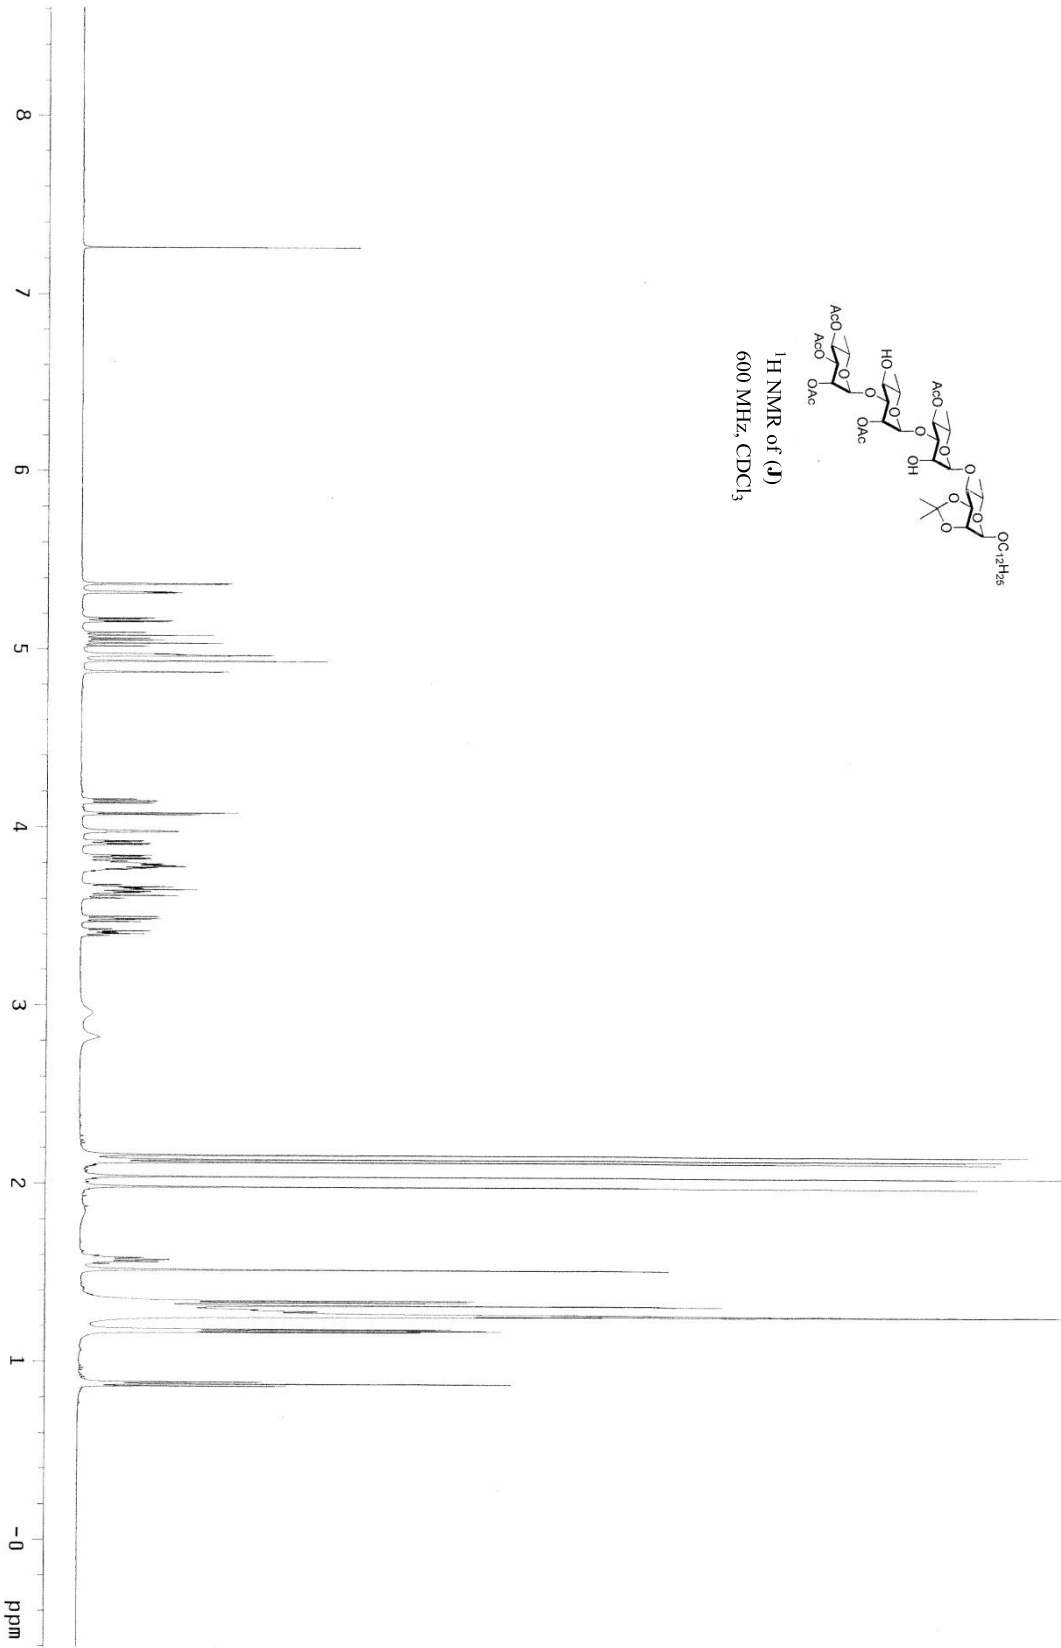

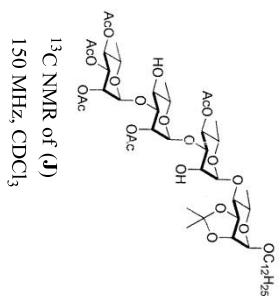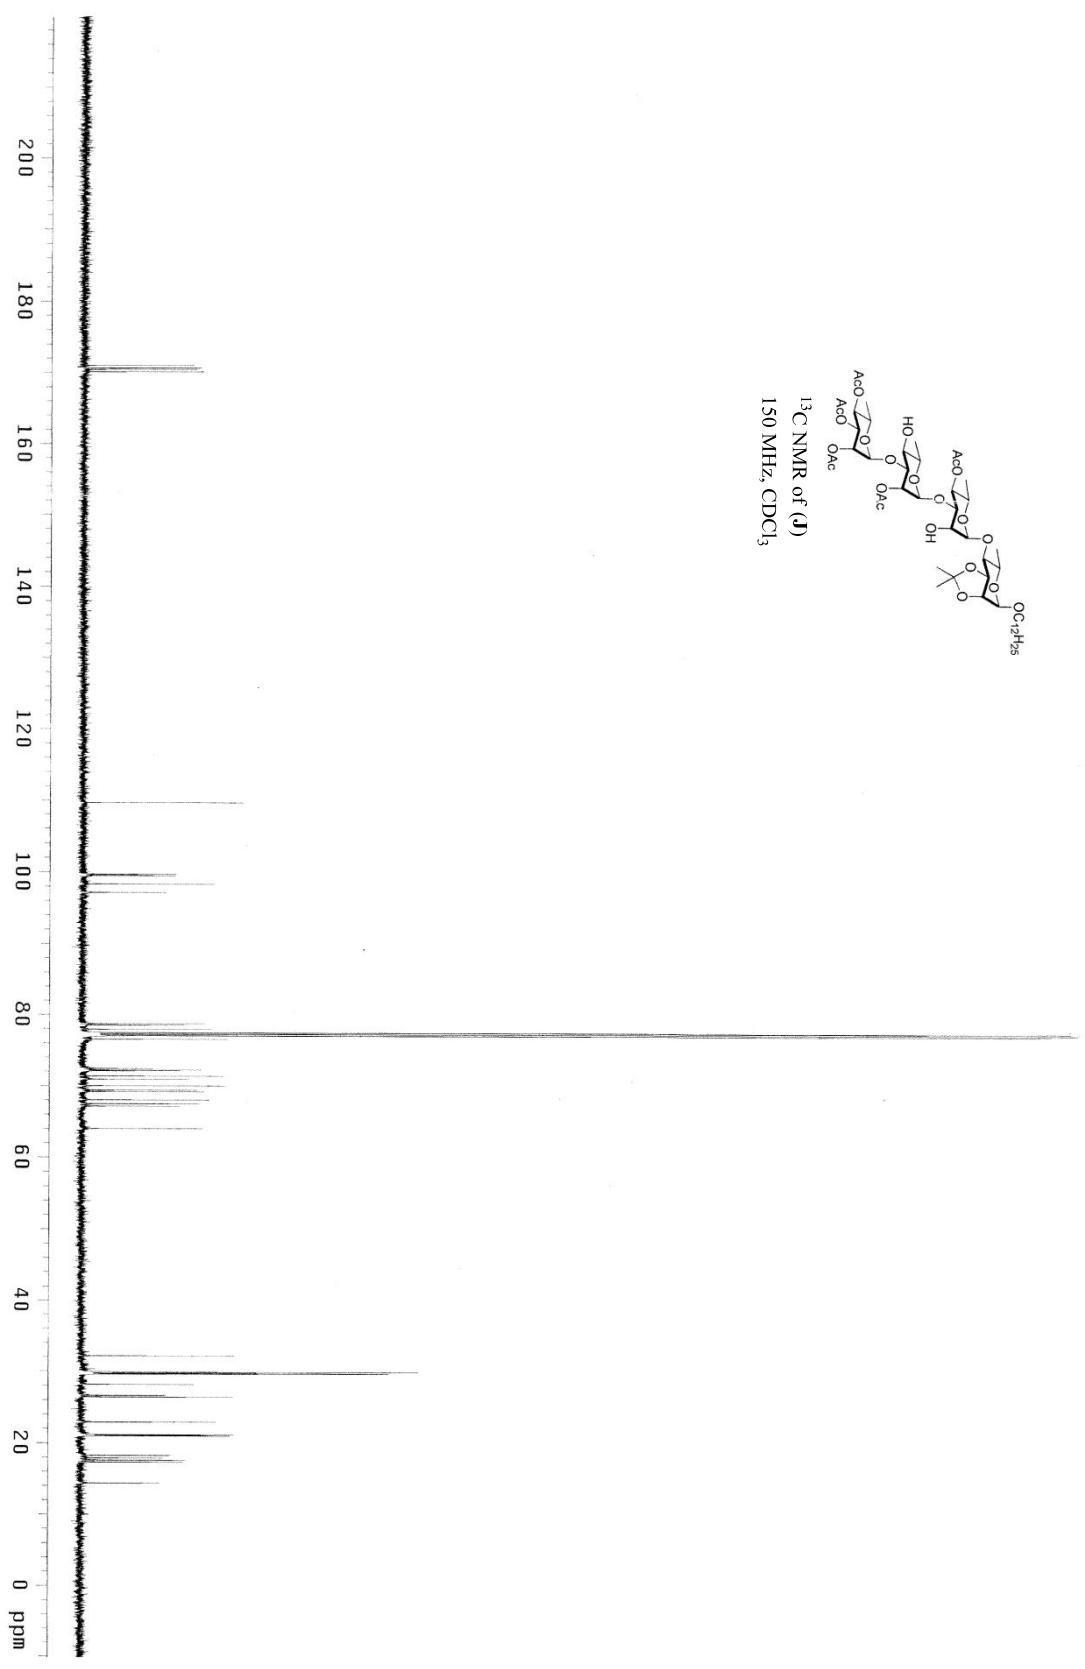

<sup>1</sup>H NMR of Clotretroside-NEW2 (10)  
(600 MHz, CD<sub>3</sub>OD)

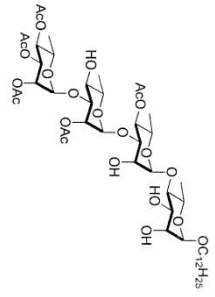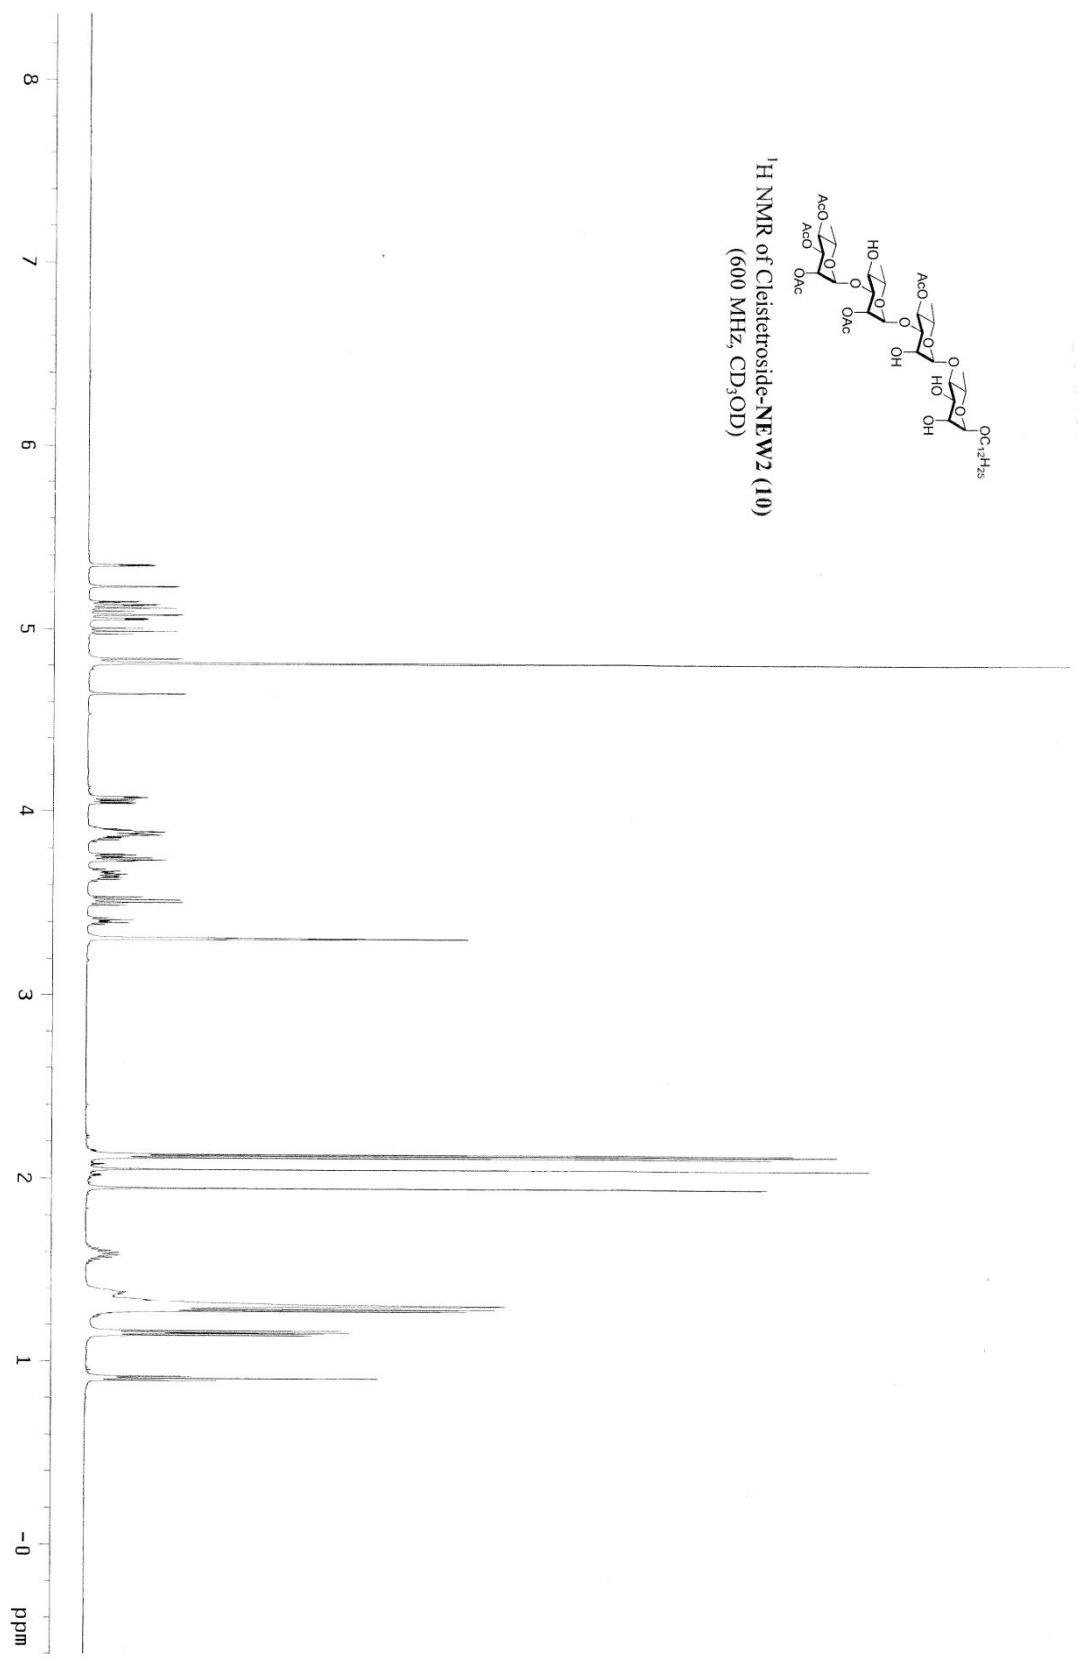

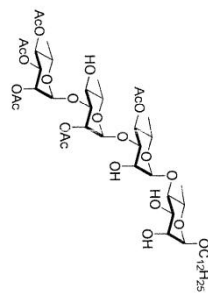

<sup>13</sup>C NMR of Cleistretroside-NEW2 (10)  
(150 MHz, CD<sub>3</sub>OD)

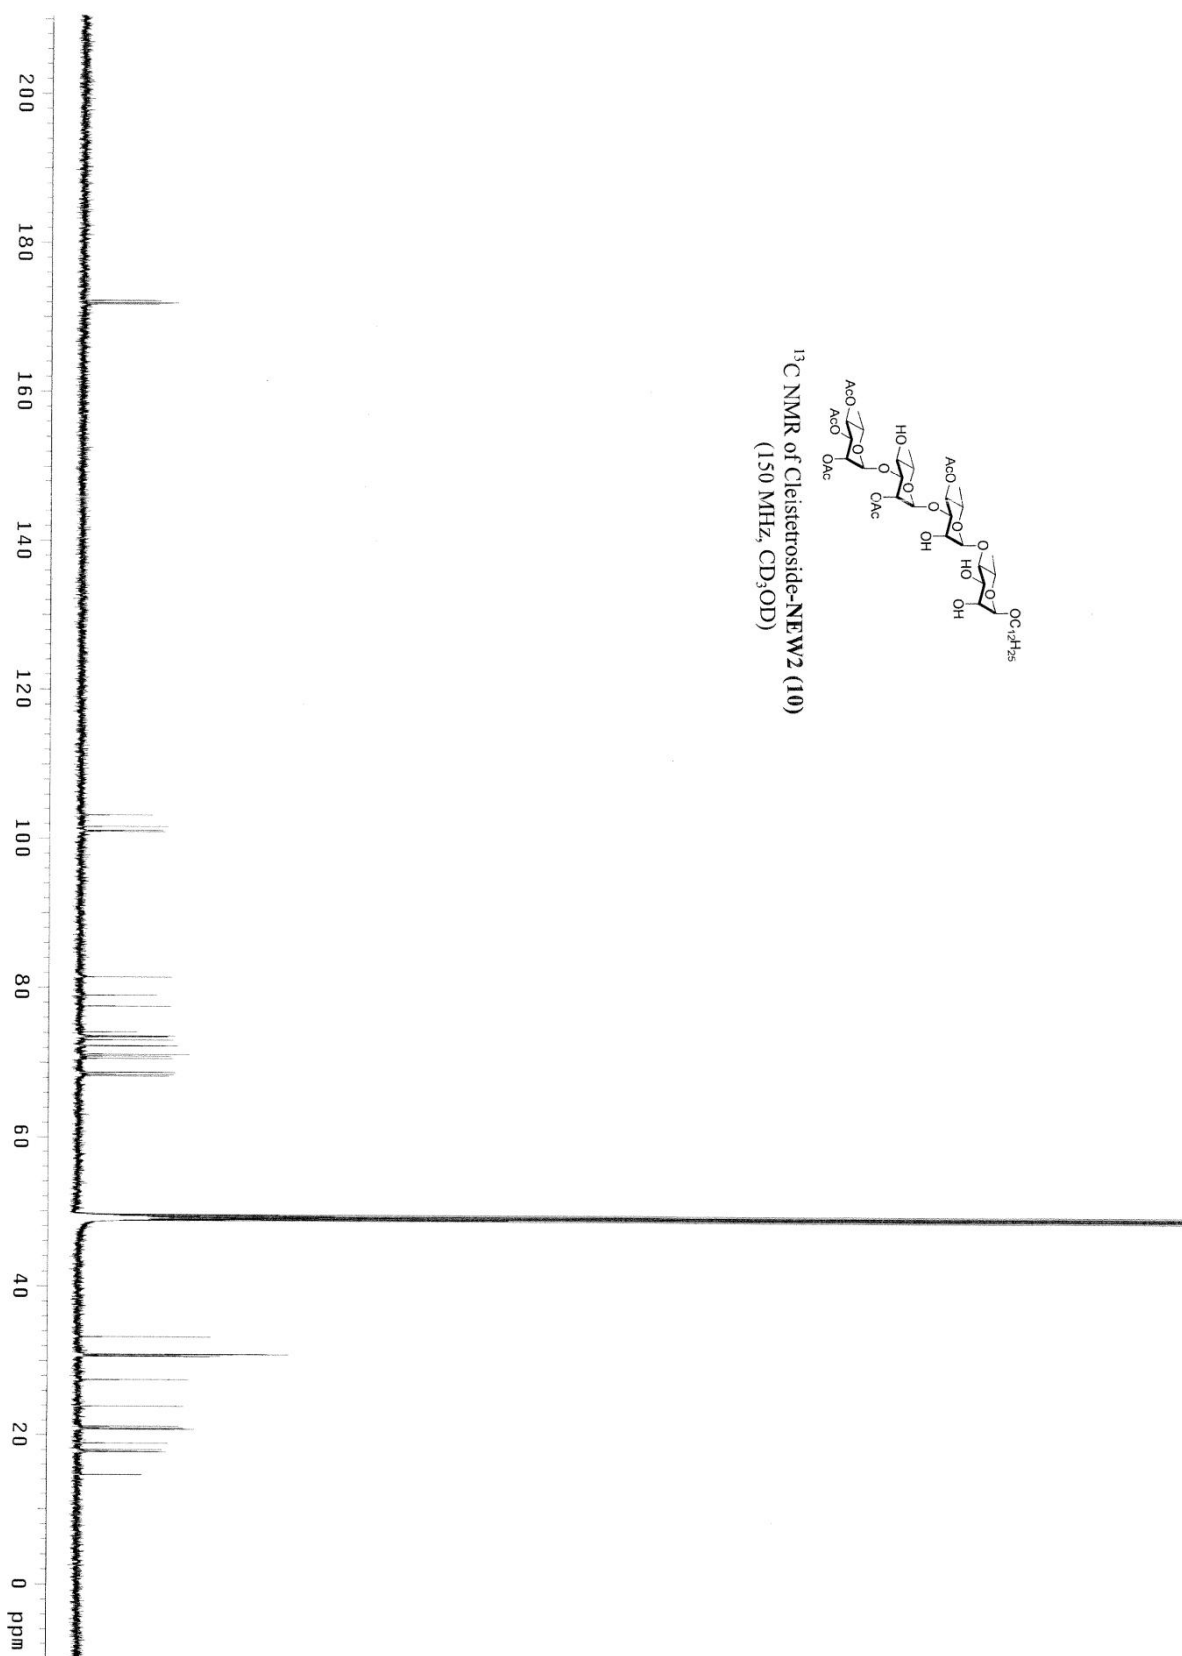

STANDARD PROTON PARAMETERS

Archive directory: /export/home/vnmr1/vnmrSYS/data  
 Sample directory:

Pulse Sequence: s2pul

Solvent: CDCl<sub>3</sub>

Temp: 28.0 C / 301.1 K

File: 021309-1H

INOVA-600 "inova600"

Relax: delay 1.000 sec

Pulse: 30.0 degrees

Acq. time 4.000 sec

NUC1: 13C, 6.0 Hz

NUC2: 1H, 599.6670039 MHz

DATA PROCESSING

Line broadening 0.2 Hz

FT size 131072

Total time 0 min, 20 sec

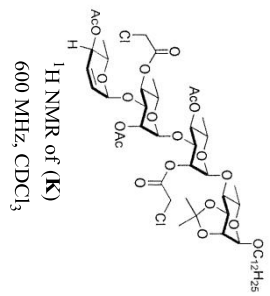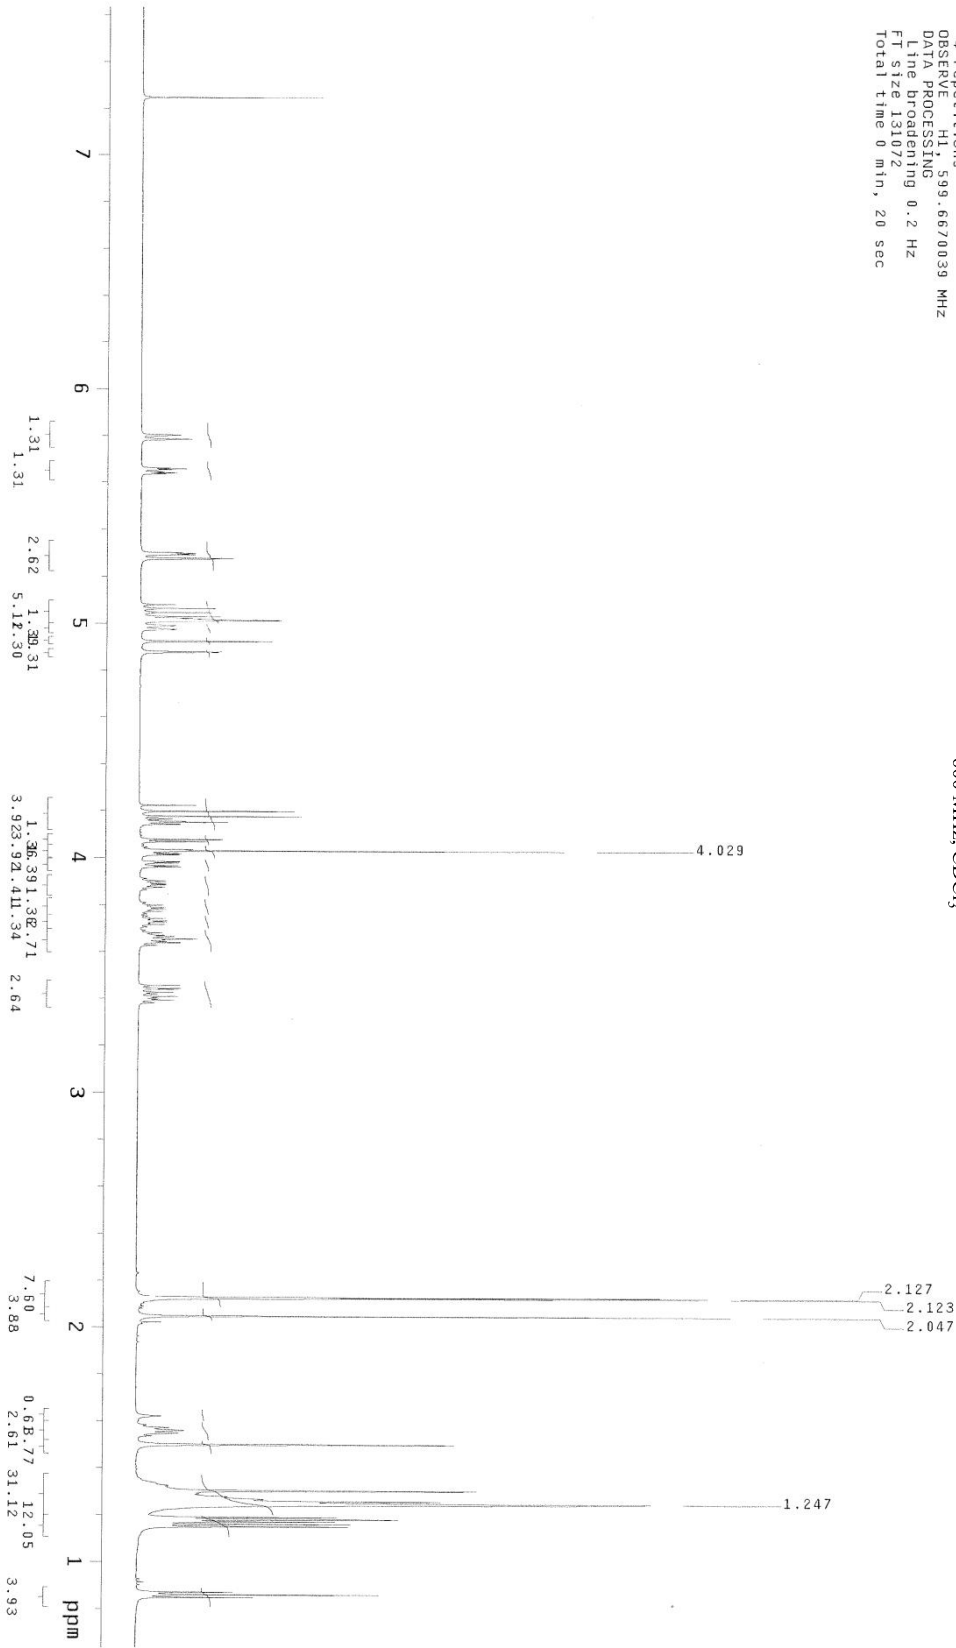



STANDARD CARBON PARAMETERS

Pulse Sequence: s2pu1  
Solvent: CDCl3  
Temp: 28.0 C / 301.1 K  
User: 1-14-87  
File: 021309-1C  
INDVA-600 "inovav600"

Relax. delay 0.500 sec  
Pulse 29.9 degrees  
Acq. time 1.400 sec  
Vht 58003.6 Hz  
240 Hertz  
OBSERVE C13, 150.7863857 MHz  
DECOUPLE H1, 599.6700024 MHz  
Power 40 dB  
continuously on  
WALTZ-16 modulated  
DATA PROCESSING  
Line broadening 1.0 Hz  
FT size 131072  
Total time 32 min, 34 sec

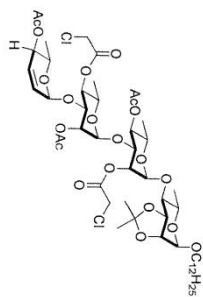

<sup>13</sup>C NMR of (K)  
150 MHz, CDCl<sub>3</sub>

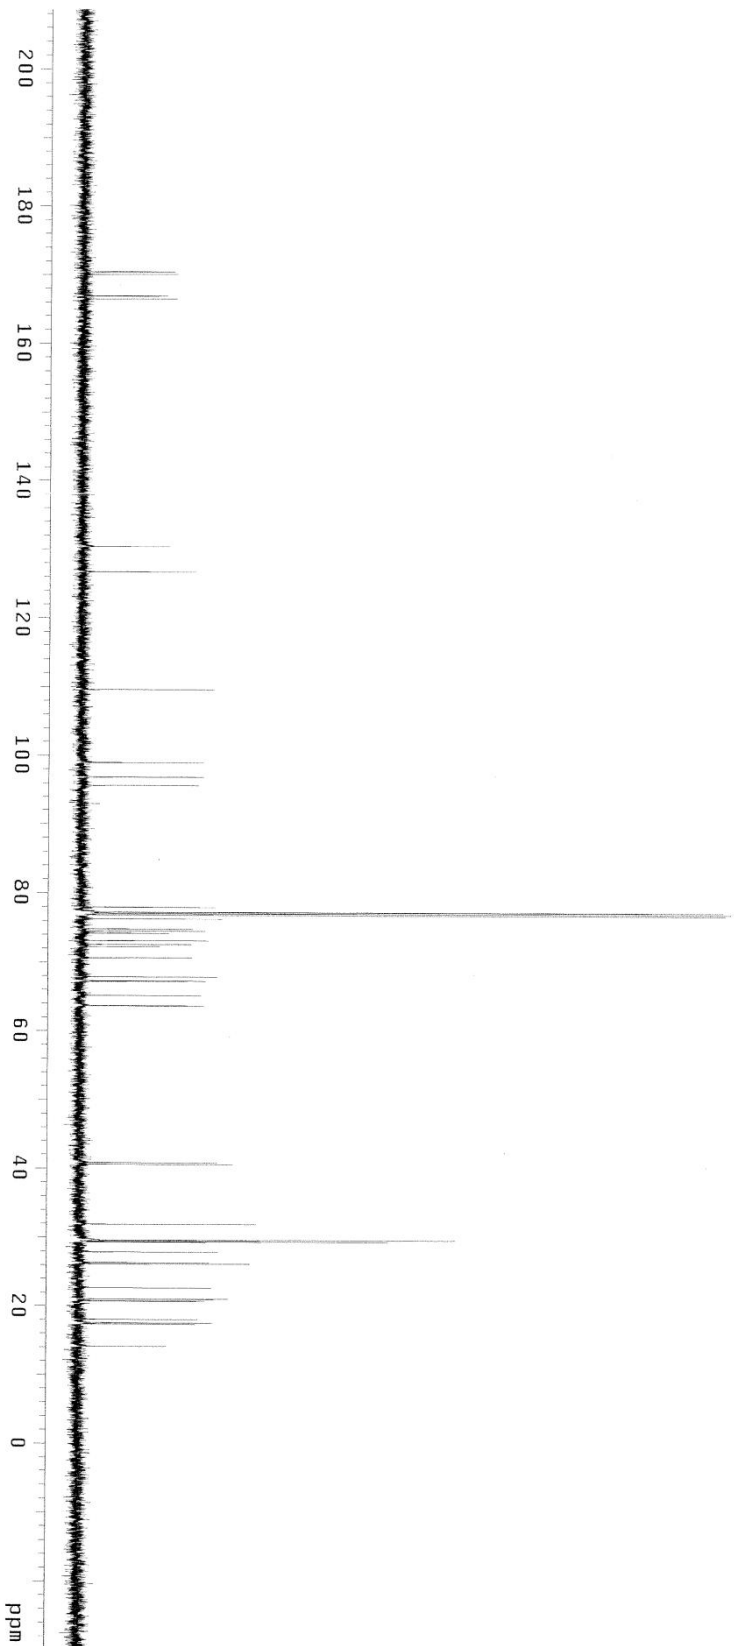

STANDARD PROTON PARAMETERS  
 Archive directory: /export/home/vnmr1/vnmr-sys/data  
 Sample directory:

Pulse Sequence: s2pul  
 Solvent: CDCl3  
 Temp: 29.8 C / 301.1 K  
 F1: 0298976  
 INOVA-600 "NOVA600"

Relax. delay 1.000 sec  
 Pulse 30.0 degrees  
 Acq. time 4.000 sec  
 Width 9594.6 Hz  
 4 repetitions  
 OBSERVE H1, 599.6670081 MHz  
 DATA PROCESSING  
 Line broadening 0.2 Hz  
 FT size 131072  
 Total time 0 min, 20 sec

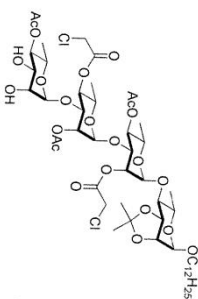

<sup>1</sup>H NMR of (19)  
 600 MHz, CDCl<sub>3</sub>

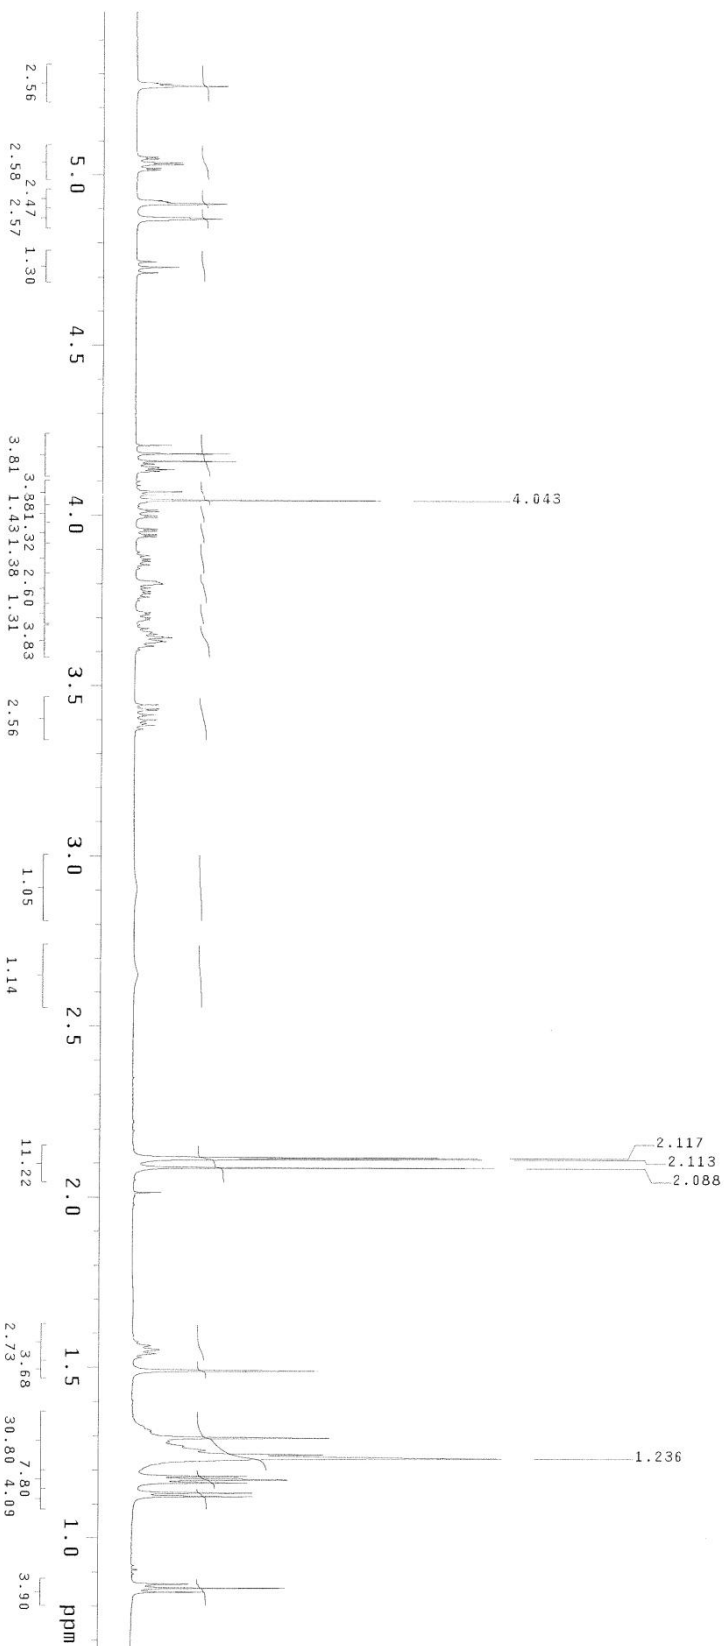

STANDARD CARBON PARAMETERS

Pulse Sequence: s2pul  
Solvent: CDCl3  
Temp.: 29.0 C / 301.1 K  
User: 11187  
INOVA-600 "INOVAS600"  
Relax. delay 0.500 sec  
Pulse 29.9 degrees  
Acq. time 1.400 sec  
Width 36003.6 Hz  
224 repetitions  
OBSERVE C13, 150.7863857 MHz  
DECUPLE H1, 599.6700024 MHz  
Power 40 dB  
PULPROG zgpg30  
VATZ inverse gated  
DATA PROCESSING  
line broadening 1.0 Hz  
FT size 131072  
Total time 32 min, 34 sec

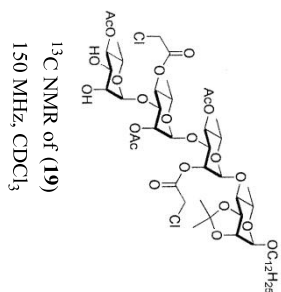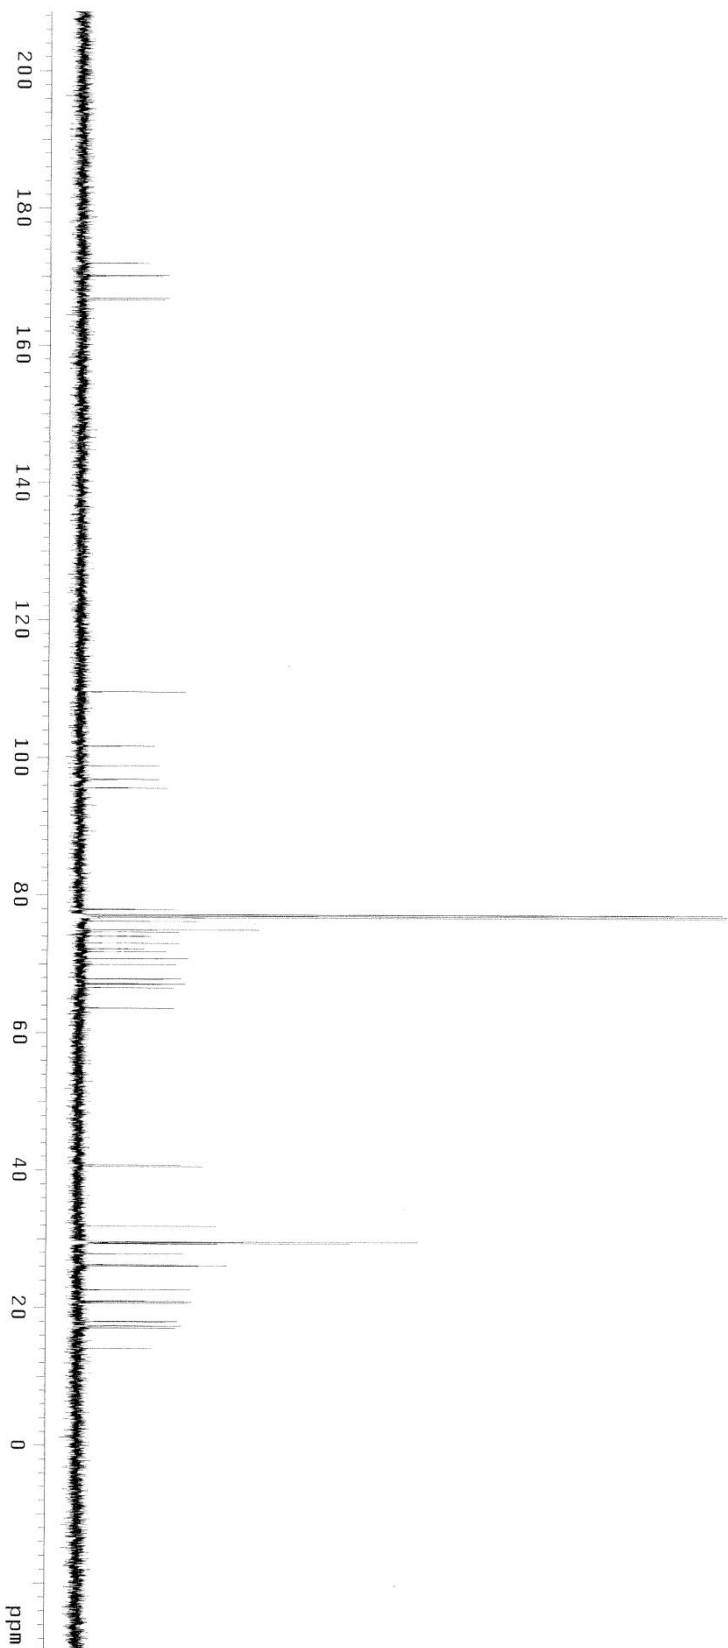

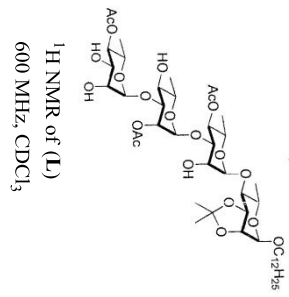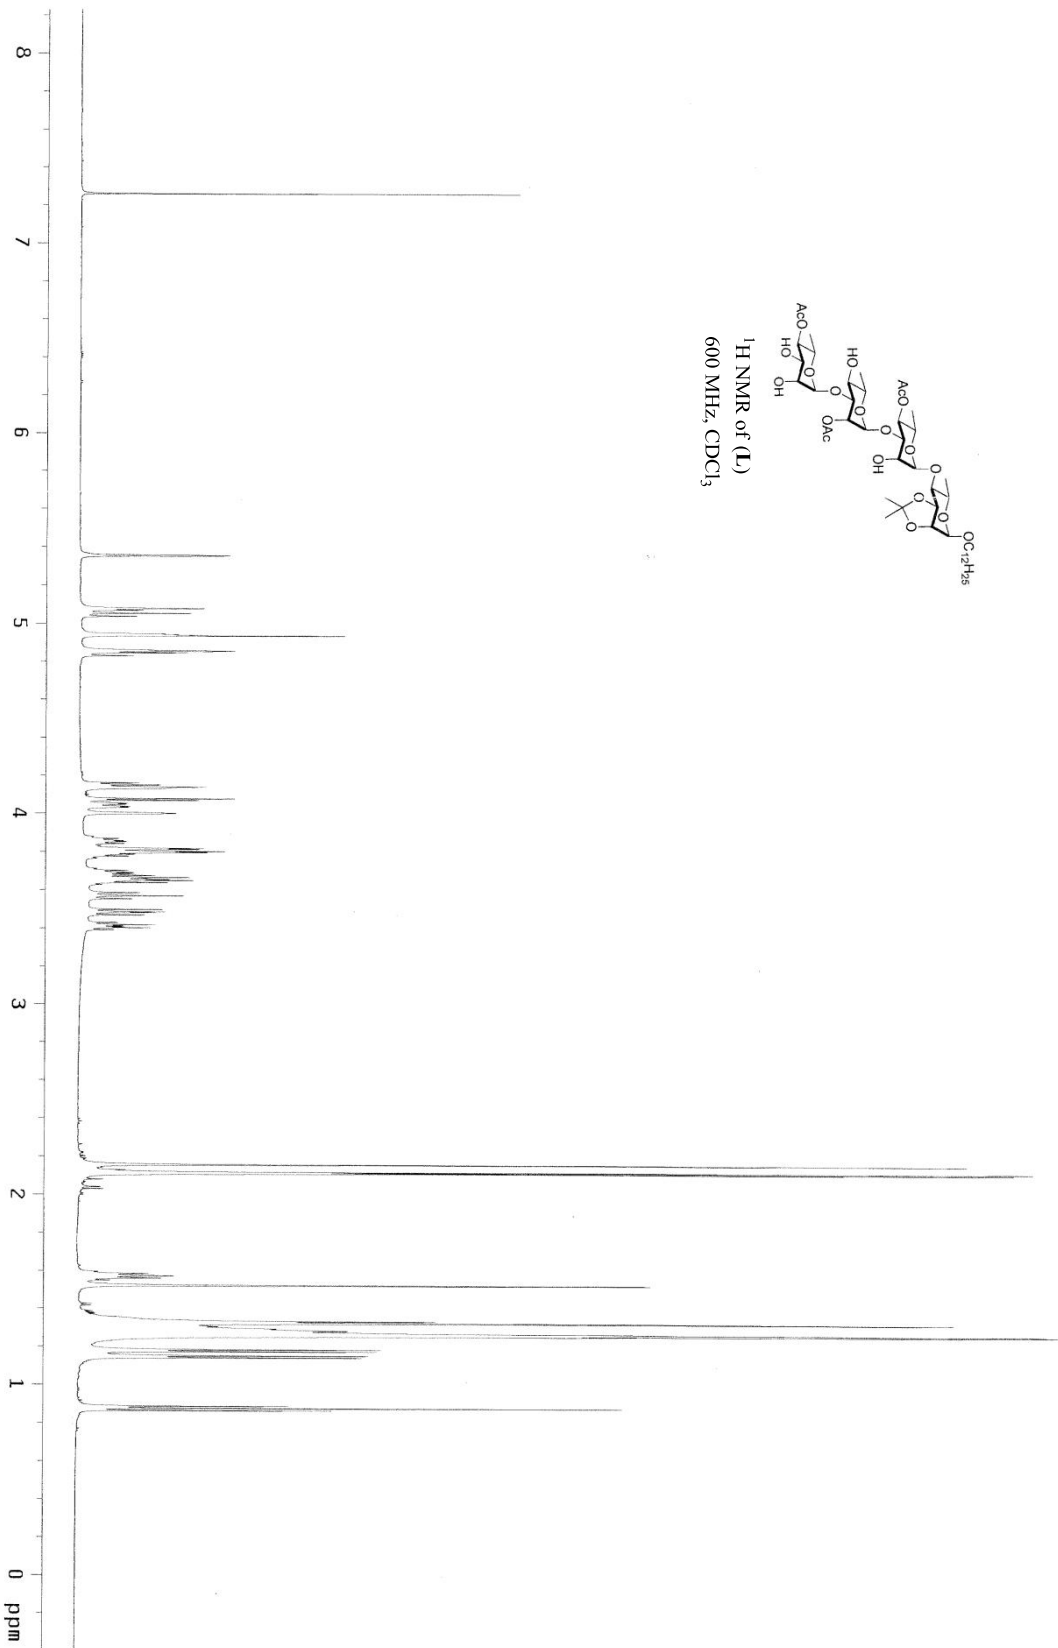

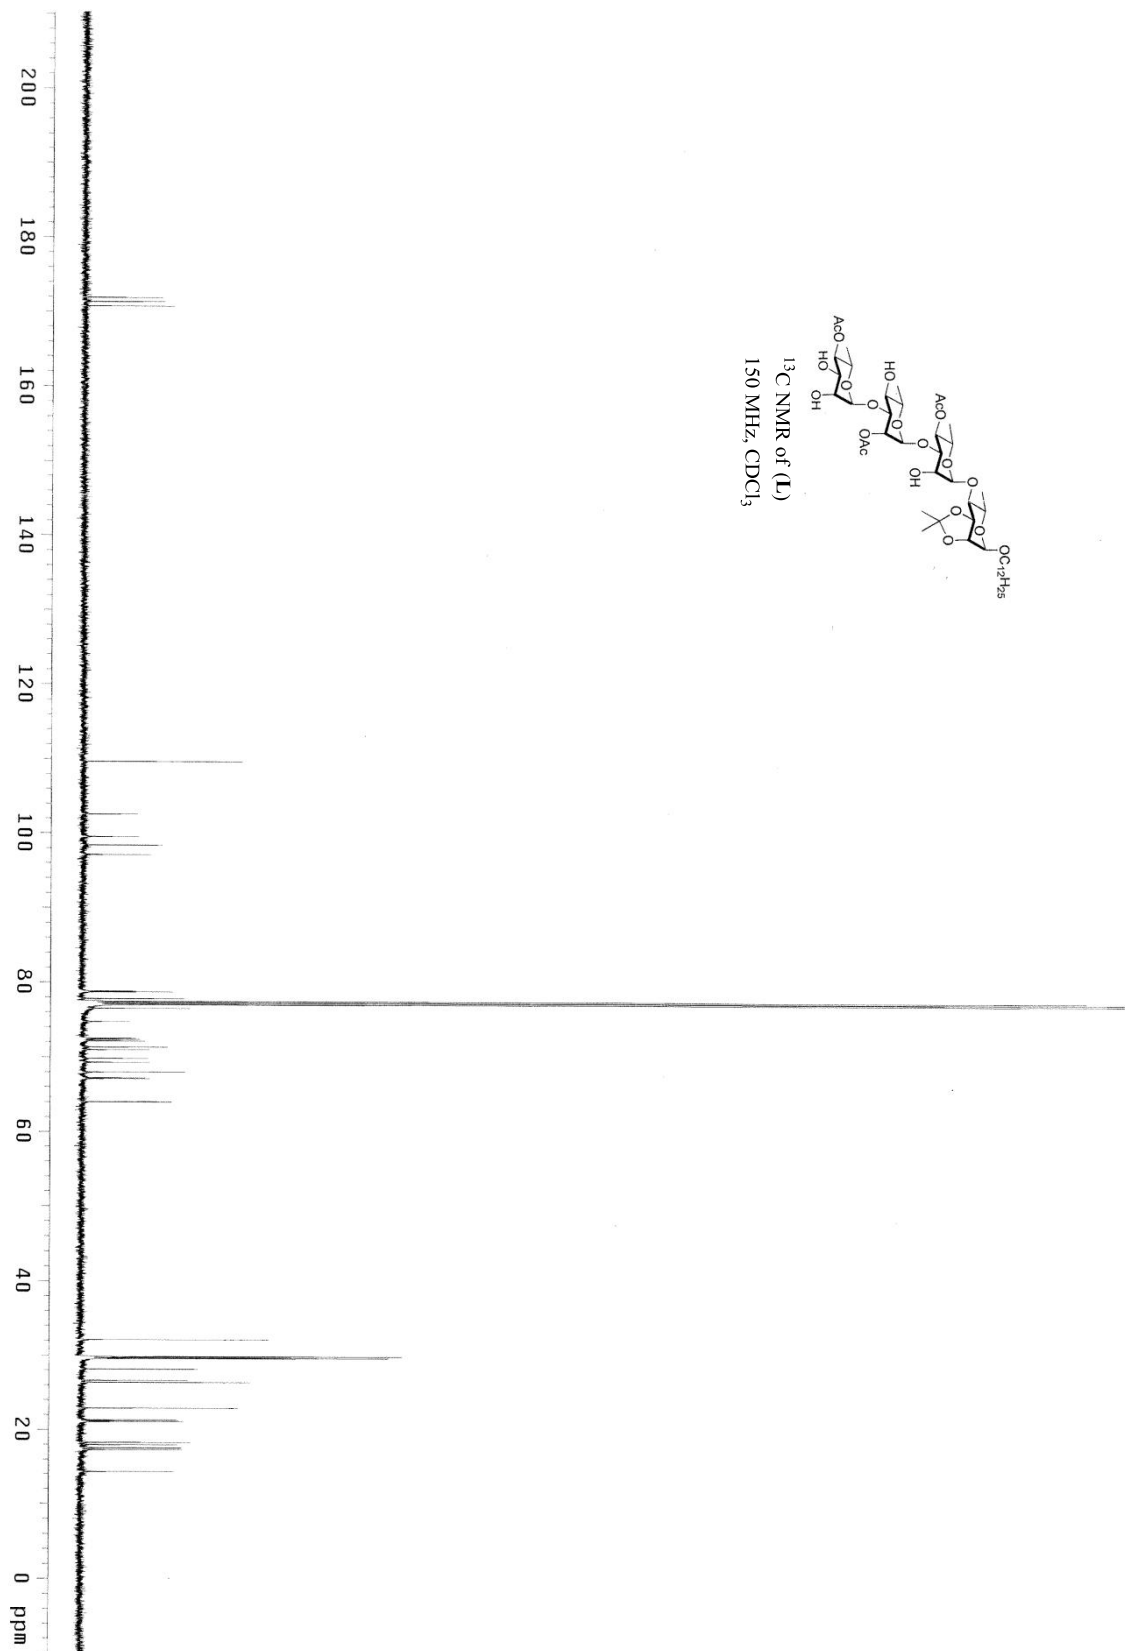

<sup>1</sup>H NMR of Cleistroside-NEW1 (9)  
(600 MHz, CD<sub>3</sub>OD)

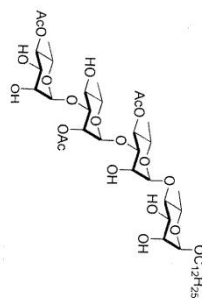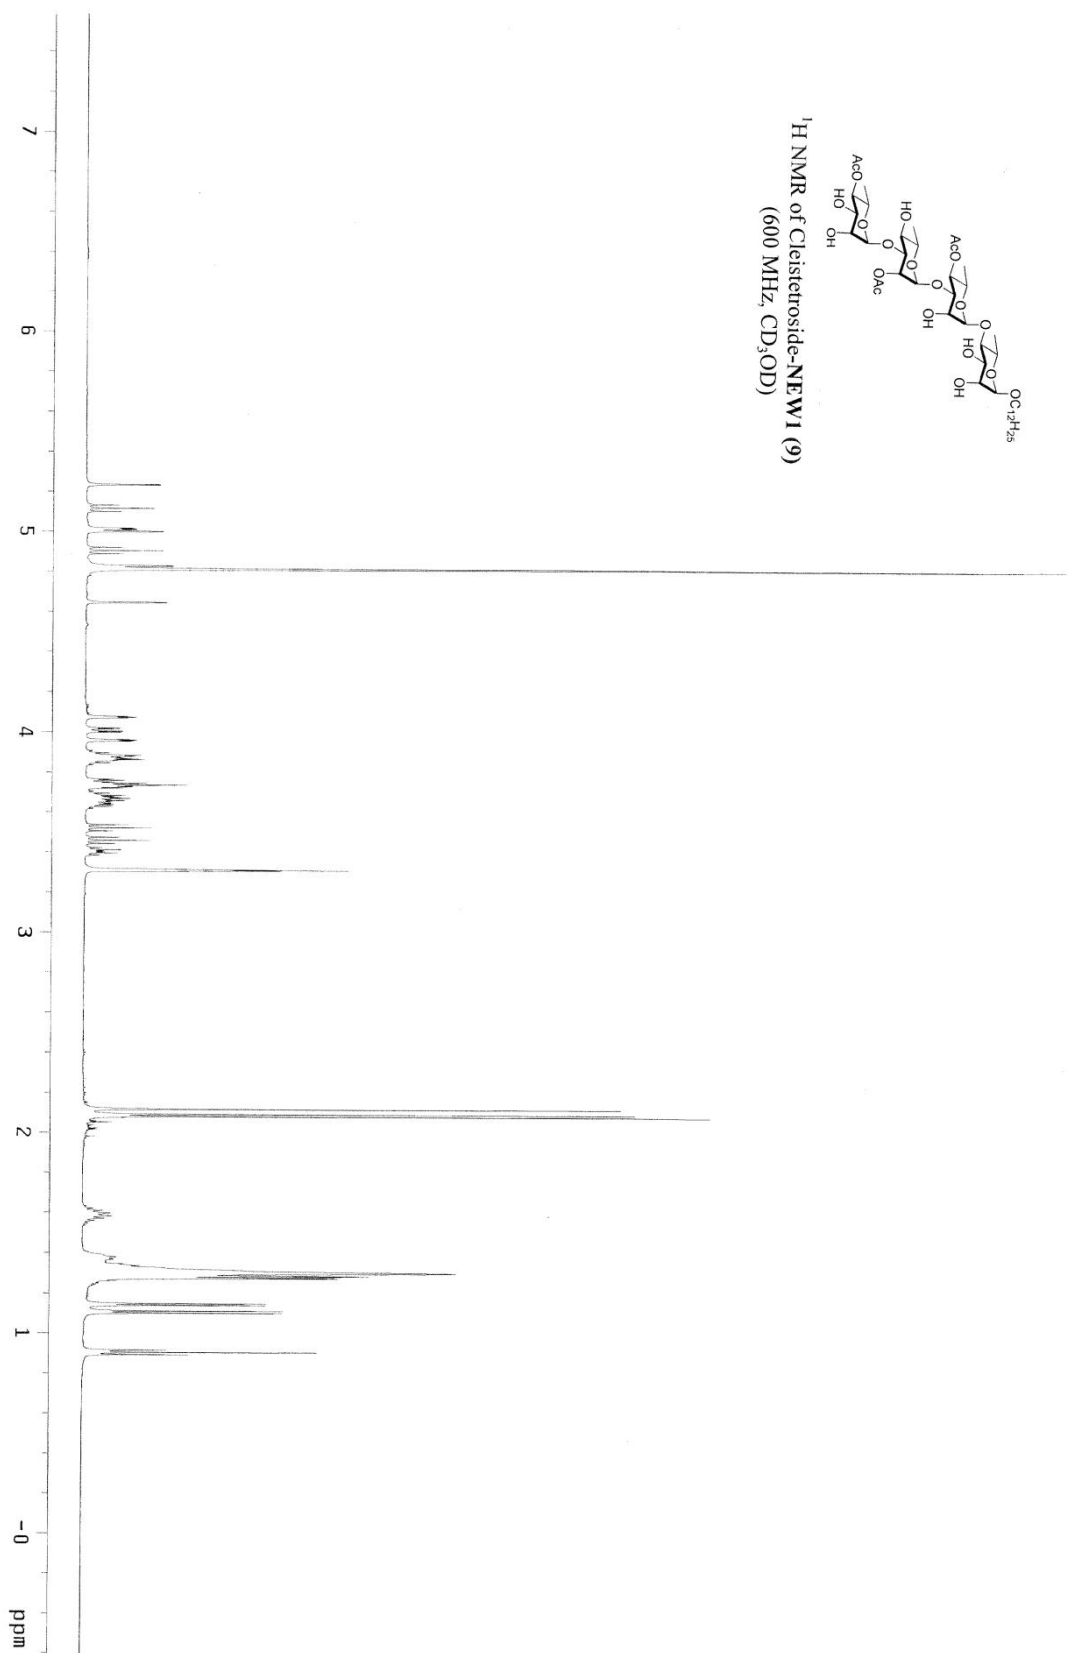



Table 1.  $^1\text{H}$  NMR chemical shifts ( $\delta/\text{ppm}$ ) of Cleistetrosides (**3**, **6**, and **new**)<sup>a</sup>

| Compd                   | Ring | H1     | H2     | H3     | H4     | H5     | 5-CH <sub>3</sub> | Others                                                                                   |
|-------------------------|------|--------|--------|--------|--------|--------|-------------------|------------------------------------------------------------------------------------------|
| Cleistetro-<br>side-3   | A    | 4.6382 | 3.7261 | 3.7413 | 3.5143 | 3.6350 | 1.2773            | 2.0877, 2.1339, 2.1369, 2.1451 ( <b>CH<sub>3</sub>COO</b> )                              |
|                         | B    | 5.2236 | 4.0560 | 3.8774 | 5.1112 | 3.8869 | 1.1455            | 3.3967 (dt, $^2J_{ab} = 9.6$ Hz, $^3J_{Ha,Hc} = ^3J_{Ha,Hd} = 6.2$ Hz, H <sup>a</sup> ), |
|                         | C    | 4.8724 | 5.0139 | 4.2317 | 4.9836 | 4.0415 | 1.1635            | 3.6629 (dt, H <sup>b</sup> ); 1.53 - 1.64 (m, H <sup>c</sup> /H <sup>d</sup> );          |
|                         | D    | 4.8166 | 4.8443 | 3.6845 | 3.3325 | 3.5104 | 1.2190            | 1.26-1.40 (m, 18H), 0.91 (t, $^3J = 7.1$ Hz, 3H, H <sup>α</sup> )                        |
| Cleistetro-<br>side-6   | A    | 4.6398 | 3.7292 | 3.7425 | 3.5153 | 3.6349 | 1.2773            | 2.0943, 2.1164, 2.1237, 2.1410, 2.1514 ( <b>CH<sub>3</sub>COO</b> )                      |
|                         | B    | 5.2233 | 4.0597 | 3.8790 | 3.8882 | 5.1058 | 1.1450            | 3.3977 (dt, $^2J_{ab} = 9.6$ Hz, $^3J_{Ha,Hc} = ^3J_{Ha,Hd} = 6.2$ Hz, H <sup>a</sup> ), |
|                         | C    | 4.8746 | 5.0233 | 4.2695 | 4.9901 | 4.0528 | 1.1674            | 3.6489 (dt, H <sup>b</sup> ); 1.53-1.64 (m, H <sup>c</sup> /H <sup>d</sup> );            |
|                         | D    | 4.8545 | 4.8645 | 3.8483 | 4.8545 | 3.7030 | 1.1158            | 1.26-1.40 (m, 18H), 0.91 (t, $^3J = 7.1$ Hz, 3H, H <sup>α</sup> )                        |
| Cleistetro-<br>side-new | A    | 4.6421 | 3.7312 | 3.7525 | 3.5198 | 3.6357 | 1.2796            | 2.0837, 2.0945, 2.1197 ( <b>CH<sub>3</sub>COO</b> )                                      |
|                         | B    | 5.2302 | 3.8702 | 3.8815 | 5.1120 | 3.8815 | 1.1437            | 3.3999 (dt, $^2J_{ab} = 9.6$ Hz, $^3J_{Ha,Hc} = ^3J_{Ha,Hd} = 6.2$ Hz, H <sup>a</sup> ), |
|                         | C    | 4.8258 | 5.0082 | 4.0088 | 3.4564 | 3.8574 | 1.2825            | 3.6586 (dt, H <sup>b</sup> ); 1.53 - 1.64 (m, H <sup>c</sup> /H <sup>d</sup> );          |
|                         | D    | 4.9943 | 3.9585 | 3.7291 | 4.9021 | 3.6769 | 1.1041            | 1.26-1.40 (m, 18H), 0.90 (t, $^3J = 7.1$ Hz, 3H, H <sup>α</sup> )                        |

(a) Chemical shifts and coupling constants were determined by simulation



Table 2.  $^3J_{\text{HH}}$  coupling constants (J/Hz) in Cleistetrosides (**3**, **6**, and **new**)

| Compd                  | $^3J_{\text{HH}}$     | Ring A | Ring B | Ring C | Ring D |
|------------------------|-----------------------|--------|--------|--------|--------|
| Cleistetroside-3       | H1 – H2               | 1.74   | 1.71   | 1.64   | 1.72   |
|                        | H2 – H3               | 3.45   | 3.32   | 3.50   | 3.42   |
|                        | H3 – H4               | 9.42   | 9.83   | 9.95   | 9.77   |
|                        | H4 – H5               | 9.42   | 9.83   | 9.95   | 9.77   |
|                        | H5- 5-CH <sub>3</sub> | 6.22   | 6.28   | 6.28   | 6.28   |
| Cleistetroside-6       | H1 – H2               | 1.71   | 1.75   | 1.70   | 1.71   |
|                        | H2 – H3               | 3.36   | 3.40   | 3.49   | 3.55   |
|                        | H3 –H4                | 9.51   | 9.88   | 9.94   | 9.91   |
|                        | H4 – H5               | 9.51   | 9.88   | 9.94   | 9.91   |
|                        | H5- 5-CH <sub>3</sub> | 6.22   | 6.28   | 6.31   | 6.28   |
| Cleistetroside-<br>new | H1 – H2               | 1.70   | 1.98   | 1.73   | 1.68   |
|                        | H2 – H3               | 3.36   | 3.31   | 3.44   | 3.48   |
|                        | H3 – H4               | 9.22   | 9.85   | 9.67   | 9.82   |
|                        | H4 – H5               | 9.22   | 9.85   | 9.67   | 9.82   |
|                        | H5- 5-CH <sub>3</sub> | 6.22   | 6.28   | 6.28   | 6.28   |

Table 3.  $^{13}\text{C}$  NMR chemical shifts ( $\delta$ /ppm) of Cleistetrosides (**3**, **6**, and **new**)

| Compd                   | Ring | C1     | C2    | C3    | C4    | C5    | Others                                                                                                                                                              |
|-------------------------|------|--------|-------|-------|-------|-------|---------------------------------------------------------------------------------------------------------------------------------------------------------------------|
| Cleistetro-<br>side-3   | A    | 101.58 | 73.00 | 73.39 | 81.45 | 68.19 | 17.77, 17.84, 17.87, 18.86 (A-5-CH <sub>3</sub> , B-5-CH <sub>3</sub> , C-5-CH <sub>3</sub> , D-5-CH <sub>3</sub> )                                                 |
|                         | B    | 103.11 | 72.23 | 73.98 | 79.09 | 68.71 | 20.95, 20.96, 21.06, 21.19 ( <b>CH<sub>3</sub>COO</b> ); 172.08, 172.29, 172.35, 172.39                                                                             |
|                         | C    | 100.81 | 73.65 | 73.94 | 76.56 | 68.27 | ( <b>CH<sub>3</sub>COO</b> ); 14.60 (C <sub>α</sub> ), 23.89 (C <sub>β</sub> ), 33.23 (C <sub>γ</sub> ), 27.46 (C <sub>k</sub> ), 30.71 (C <sub>λ</sub> ),          |
|                         | D    | 101.32 | 74.24 | 70.37 | 73.97 | 70.74 | 68.64 (C ), 30,57, 30,61, 30,84, 30,87, 30,88, 30,89 (C <sub>ε</sub> , C <sub>ξ</sub> , C <sub>ν</sub> , C <sub>θ</sub> , C <sub>ι</sub> )                          |
| Cleistetro-<br>side-6   | A    | 101.58 | 72.99 | 73.43 | 81.46 | 68.19 | 17.67, 17.76, 17.81, 18.86 (A-5-CH <sub>3</sub> , B-5-CH <sub>3</sub> , C-5-CH <sub>3</sub> , D-5-CH <sub>3</sub> )                                                 |
|                         | B    | 103.11 | 72.22 | 68.29 | 73.97 | 68.68 | 20.93, 20.94, 21.07, 21.08, 21.18 ( <b>CH<sub>3</sub>COO</b> ); 172.05, 172.24, 172.33,                                                                             |
|                         | C    | 100.92 | 73.43 | 76.27 | 74.04 | 68.29 | 172.41, 172.43 ( <b>CH<sub>3</sub>COO</b> ); 14.61 (C <sub>α</sub> ), 23.89 (C <sub>β</sub> ), 33.22 (C <sub>γ</sub> ), 27.46 (C <sub>k</sub> ),                    |
|                         | D    | 100.96 | 74.14 | 68.66 | 75.20 | 68.45 | 30.70 (C <sub>λ</sub> ), 68.66 (C ), 30,56, 30,61, 30,84, 30,87, 30,88, 30,89 (C <sub>ε</sub> , C <sub>ξ</sub> , C <sub>ν</sub> , C <sub>θ</sub> , C <sub>ι</sub> ) |
| Cleistetro-<br>side-new | A    | 101.57 | 73.09 | 73.39 | 81.34 | 68.19 | 17.77 (B-5-CH <sub>3</sub> , D-5-CH <sub>3</sub> ), 18.10, 18.87 (A-5-CH <sub>3</sub> , C-5-CH <sub>3</sub> )                                                       |
|                         | B    | 103.12 | 72.25 | 78.82 | 74.02 | 68.74 | 20.99, 21.17, 21.19 ( <b>CH<sub>3</sub>COO</b> ); 172.13, 172.25, 172.70 ( <b>CH<sub>3</sub>COO</b> );                                                              |
|                         | C    | 100.94 | 73.89 | 77.86 | 73.50 | 70.58 | 14.60 (C <sub>α</sub> ), 23.88 (C <sub>β</sub> ), 33.22 (C <sub>γ</sub> ), 27.45 (C <sub>k</sub> ), 30.70 (C <sub>λ</sub> ), 68.65 (C ),                            |
|                         | D    | 104.15 | 72.25 | 70.50 | 75.63 | 68.36 | 30,55, 30,60, 30,83, 30,86, 30,88 (C <sub>ε</sub> , C <sub>ξ</sub> , C <sub>ν</sub> , C <sub>θ</sub> , C <sub>ι</sub> )                                             |

<sup>1</sup>H NMR spectrum of Cleistetroside -6 in CD<sub>3</sub>OD

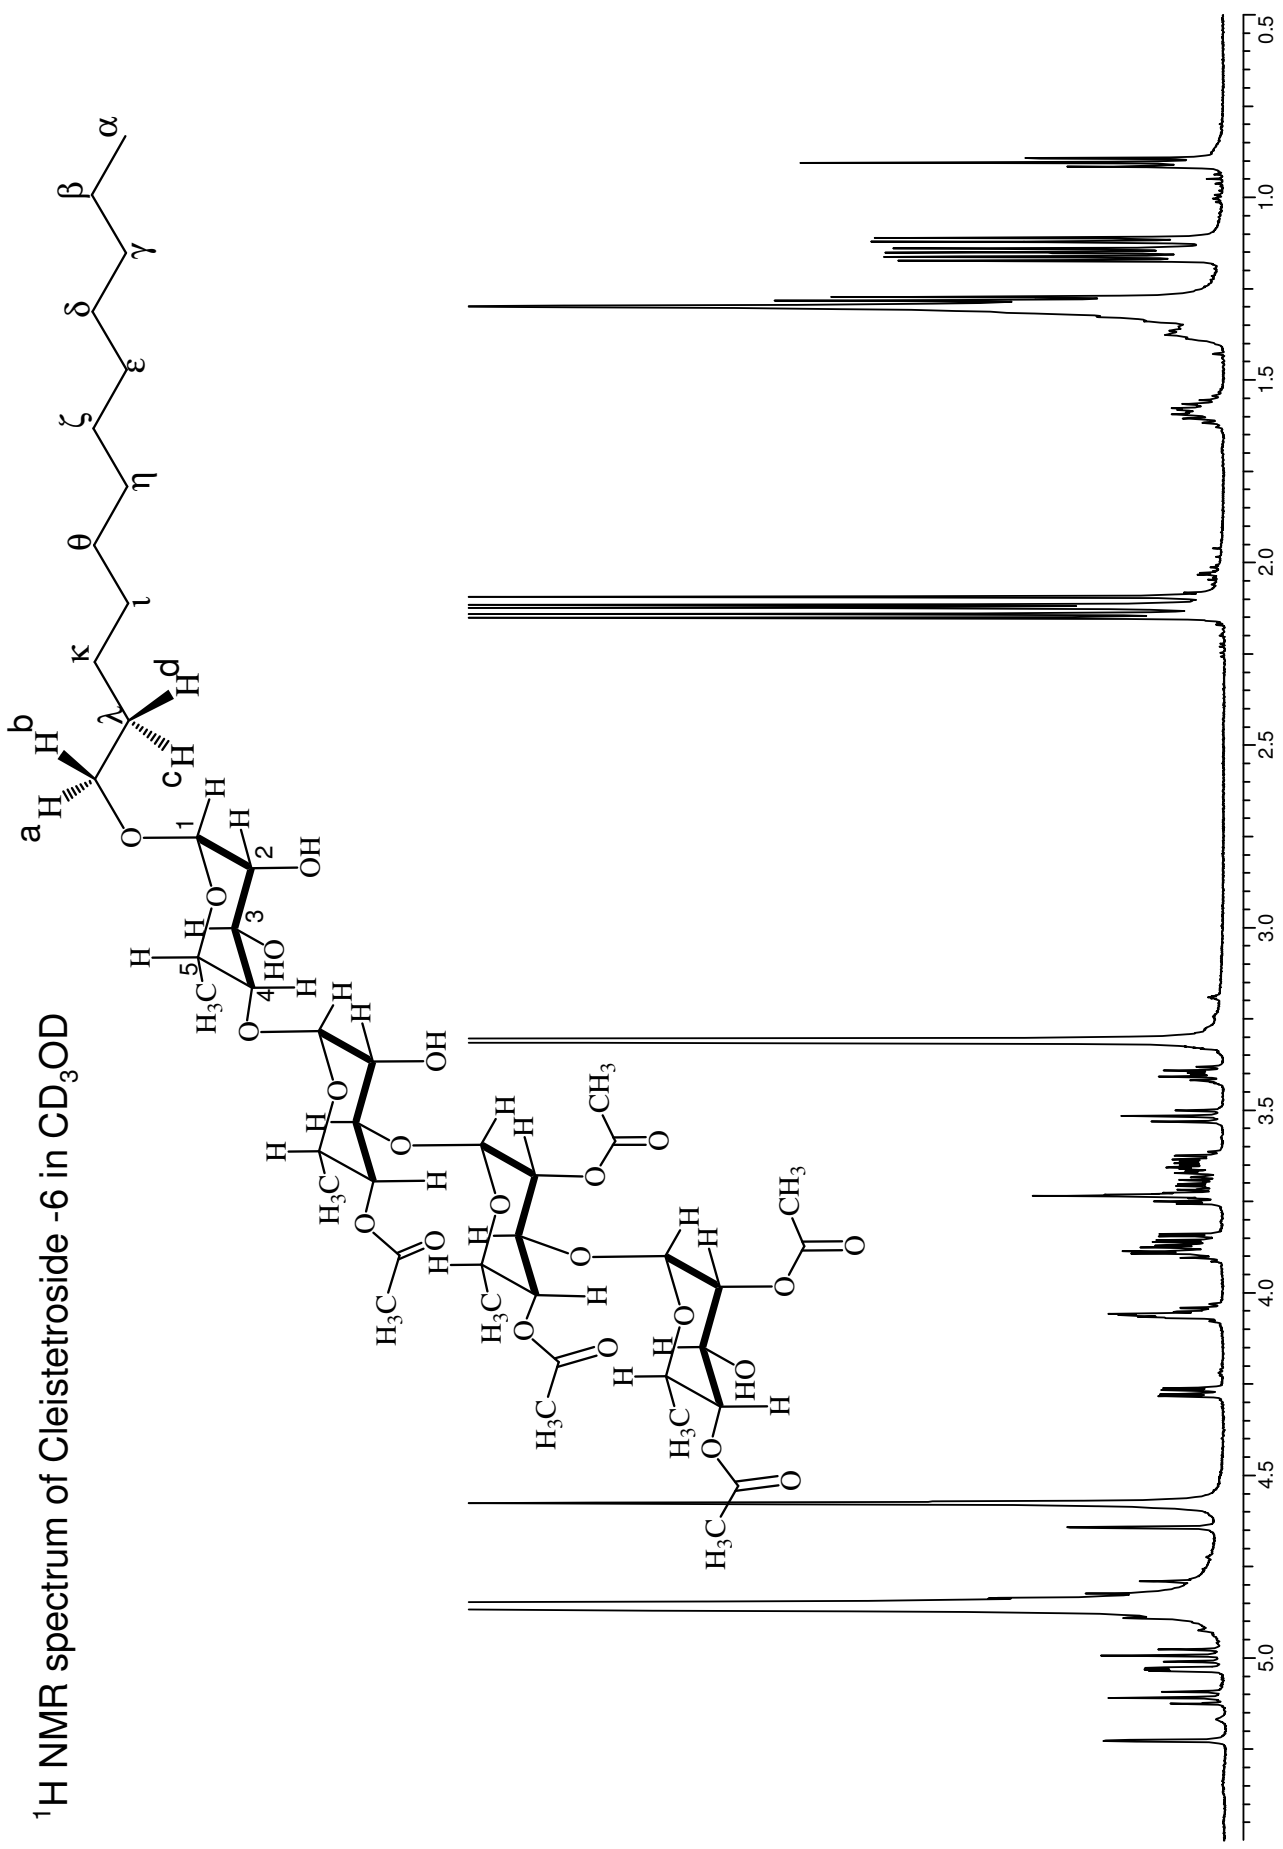

# Magnetization transfer from methyl's

## Experimental 1D TOCSY subspectra (a-d)

### Ring A

Selective excitation of 4-CH<sub>3</sub>  
at 1.27 ppm (mix = 260 ms)

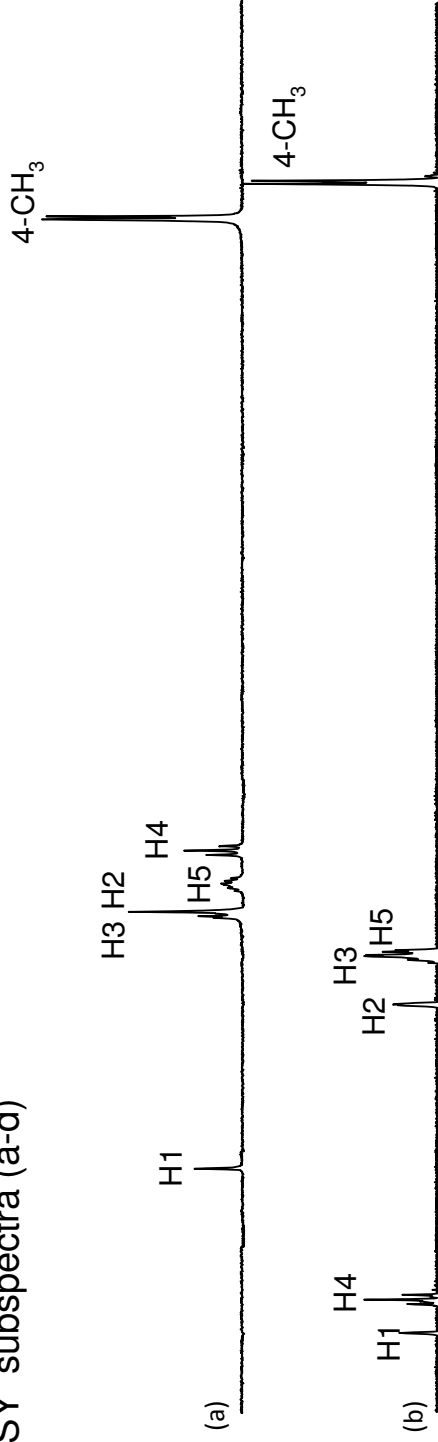

### Ring B

Selective excitation of 4-CH<sub>3</sub>  
at 1.15 ppm (mix = 260 ms)

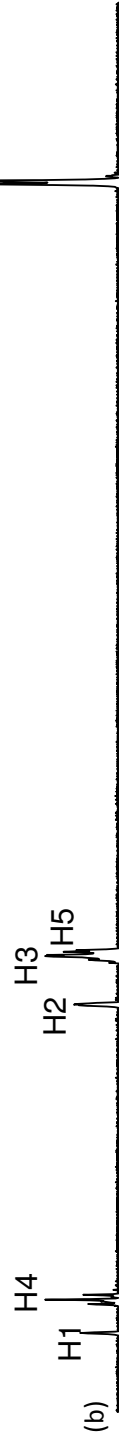

### Ring C

Selective excitation of 4-CH<sub>3</sub>  
at 1.17 ppm (mix = 260 ms)

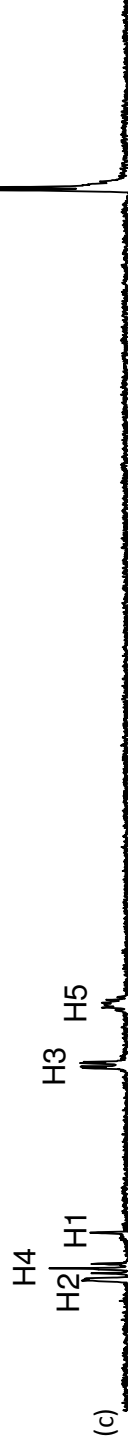

### Ring D

Selective excitation of 4-CH<sub>3</sub>  
at 1.12 ppm (mix = 260 ms)

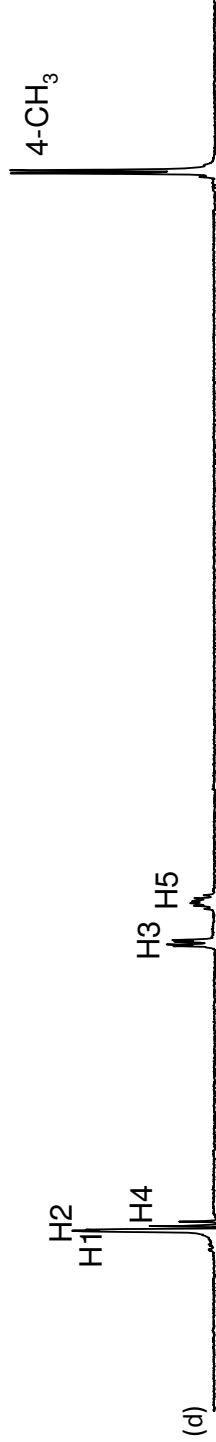

### Control <sup>1</sup>H NMR

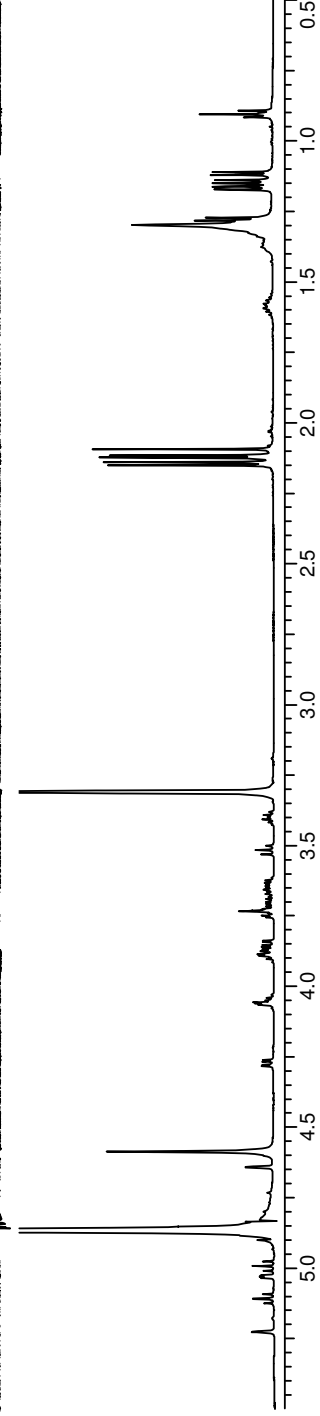

# Spin system identification in Cleistroside-6; Expanded regions of the 1D TOCSY experimental

## <sup>1</sup>H NMR subspectra (a-e)

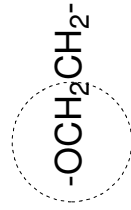

Selective excitation of H<sup>b</sup>  
at 3.39 ppm (mix = 260 ms)

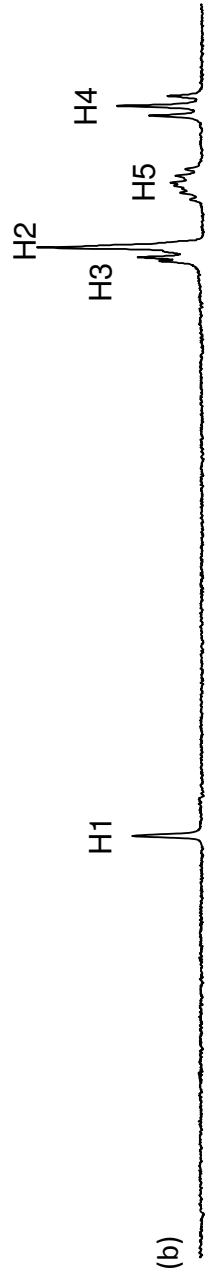

Selective excitation of 4-CH<sub>3</sub>  
at 1.27 ppm (mix = 260 ms)

### Ring A

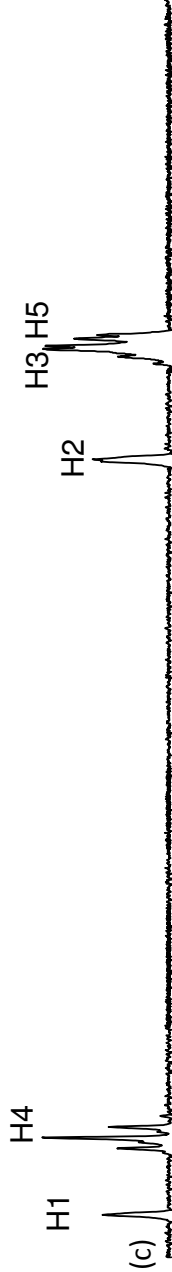

Selective excitation of 4-CH<sub>3</sub>  
at 1.15 ppm (mix = 260 ms)

### Ring B

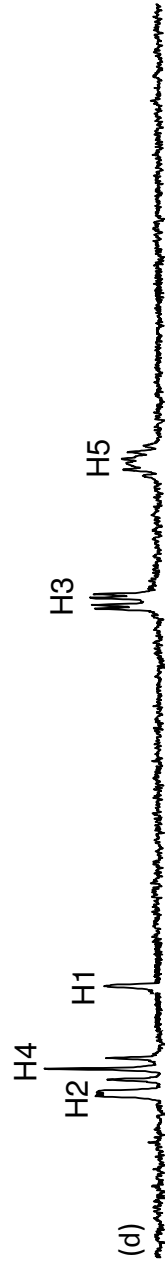

Selective excitation of 4-CH<sub>3</sub>  
at 1.17 ppm (mix = 260 ms)

### Ring C

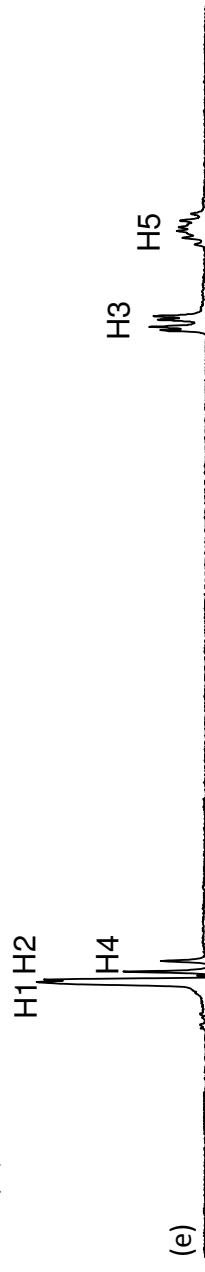

Selective excitation of 4-CH<sub>3</sub>  
at 1.12 ppm (mix = 260 ms)

### Ring D

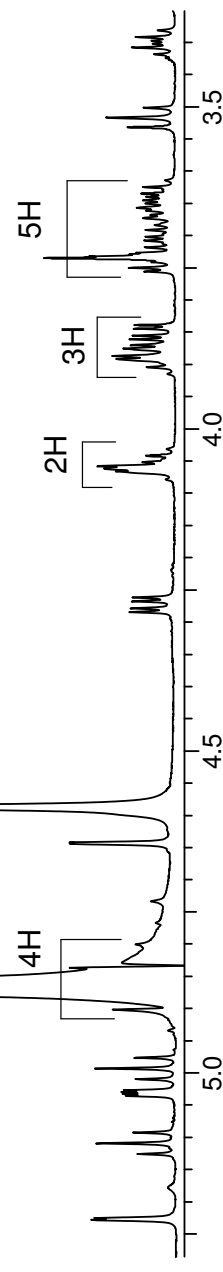

### Control <sup>1</sup>H NMR

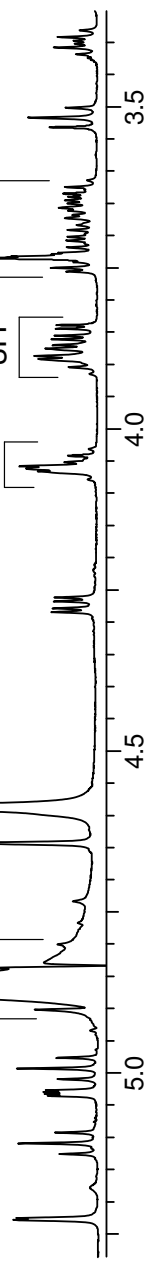

Observed **NOESY** correlations between ring protons

**DPFGSENOE** experimental subspectra (a-d)

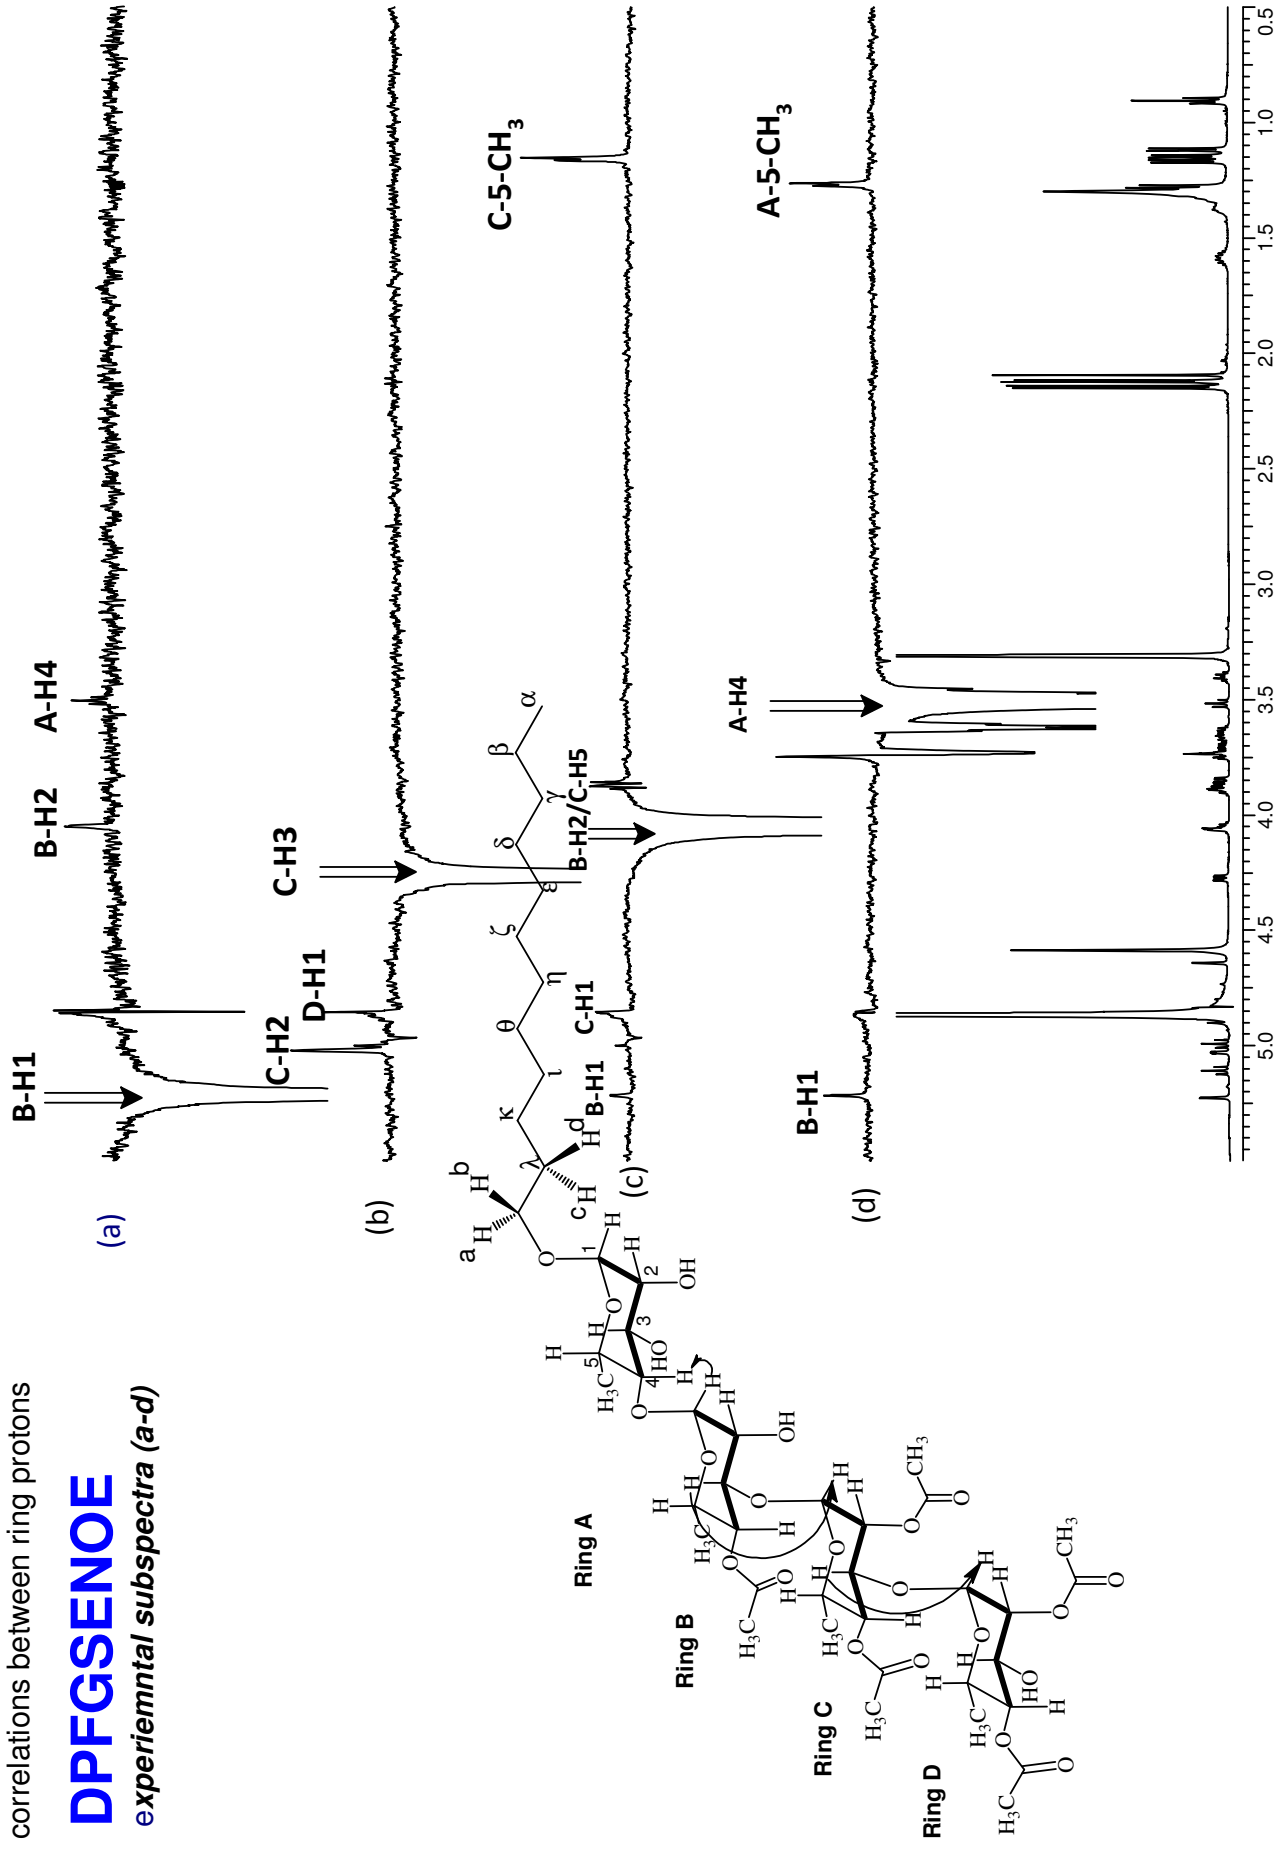

Expanded part of the countour plot of the 2D NOESY spectrum

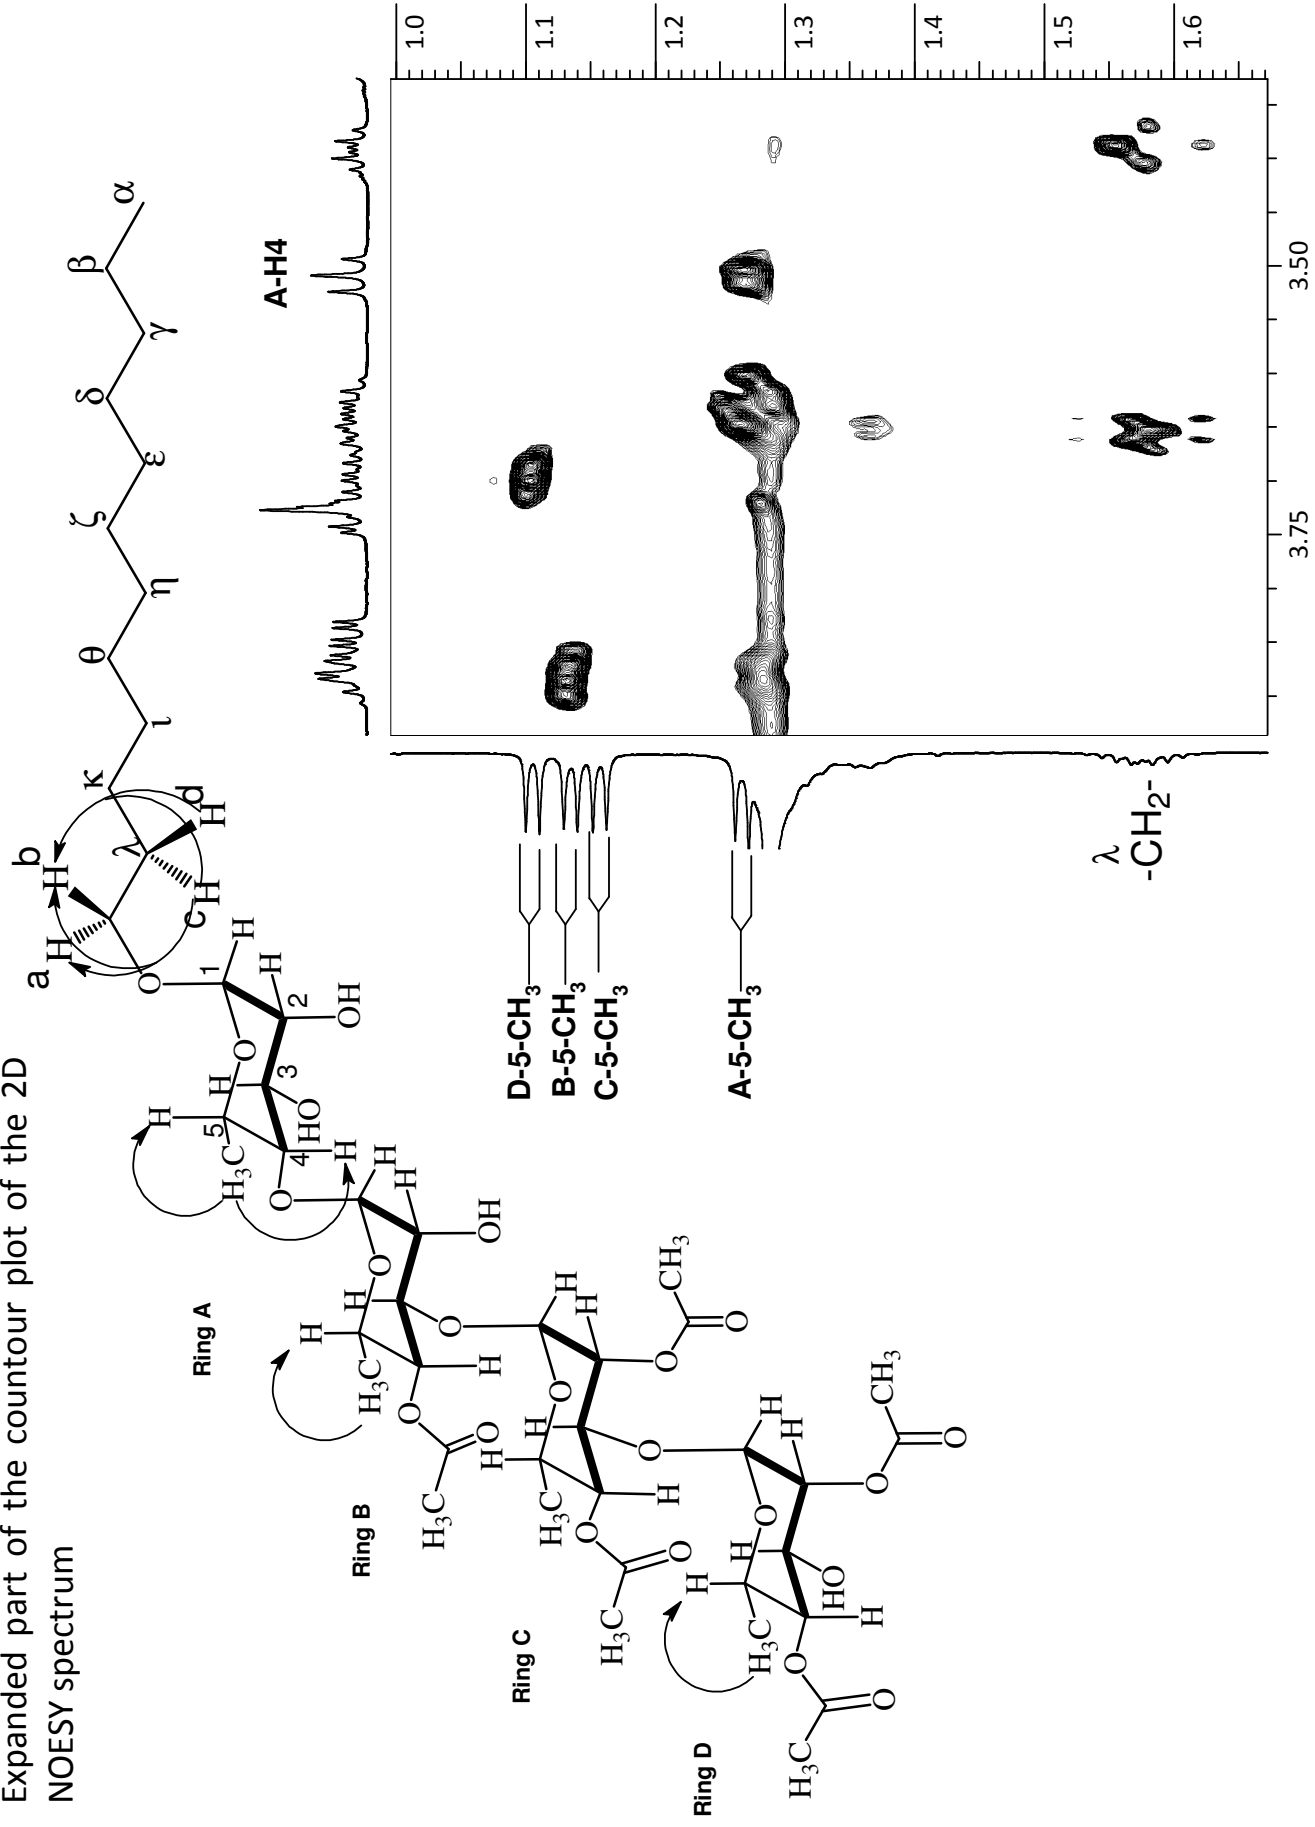

# 1D TOCSY subspectra (a-b)

(a) - Selective excitation of  $H^a$  (mix = 160 ms);

(b) - selective excitation of  $H^\alpha$  (mix = 320 ms)

*Proton chemical shift assignments of aliphatic chain ( $C_{12}H_{25}O_2$ )*

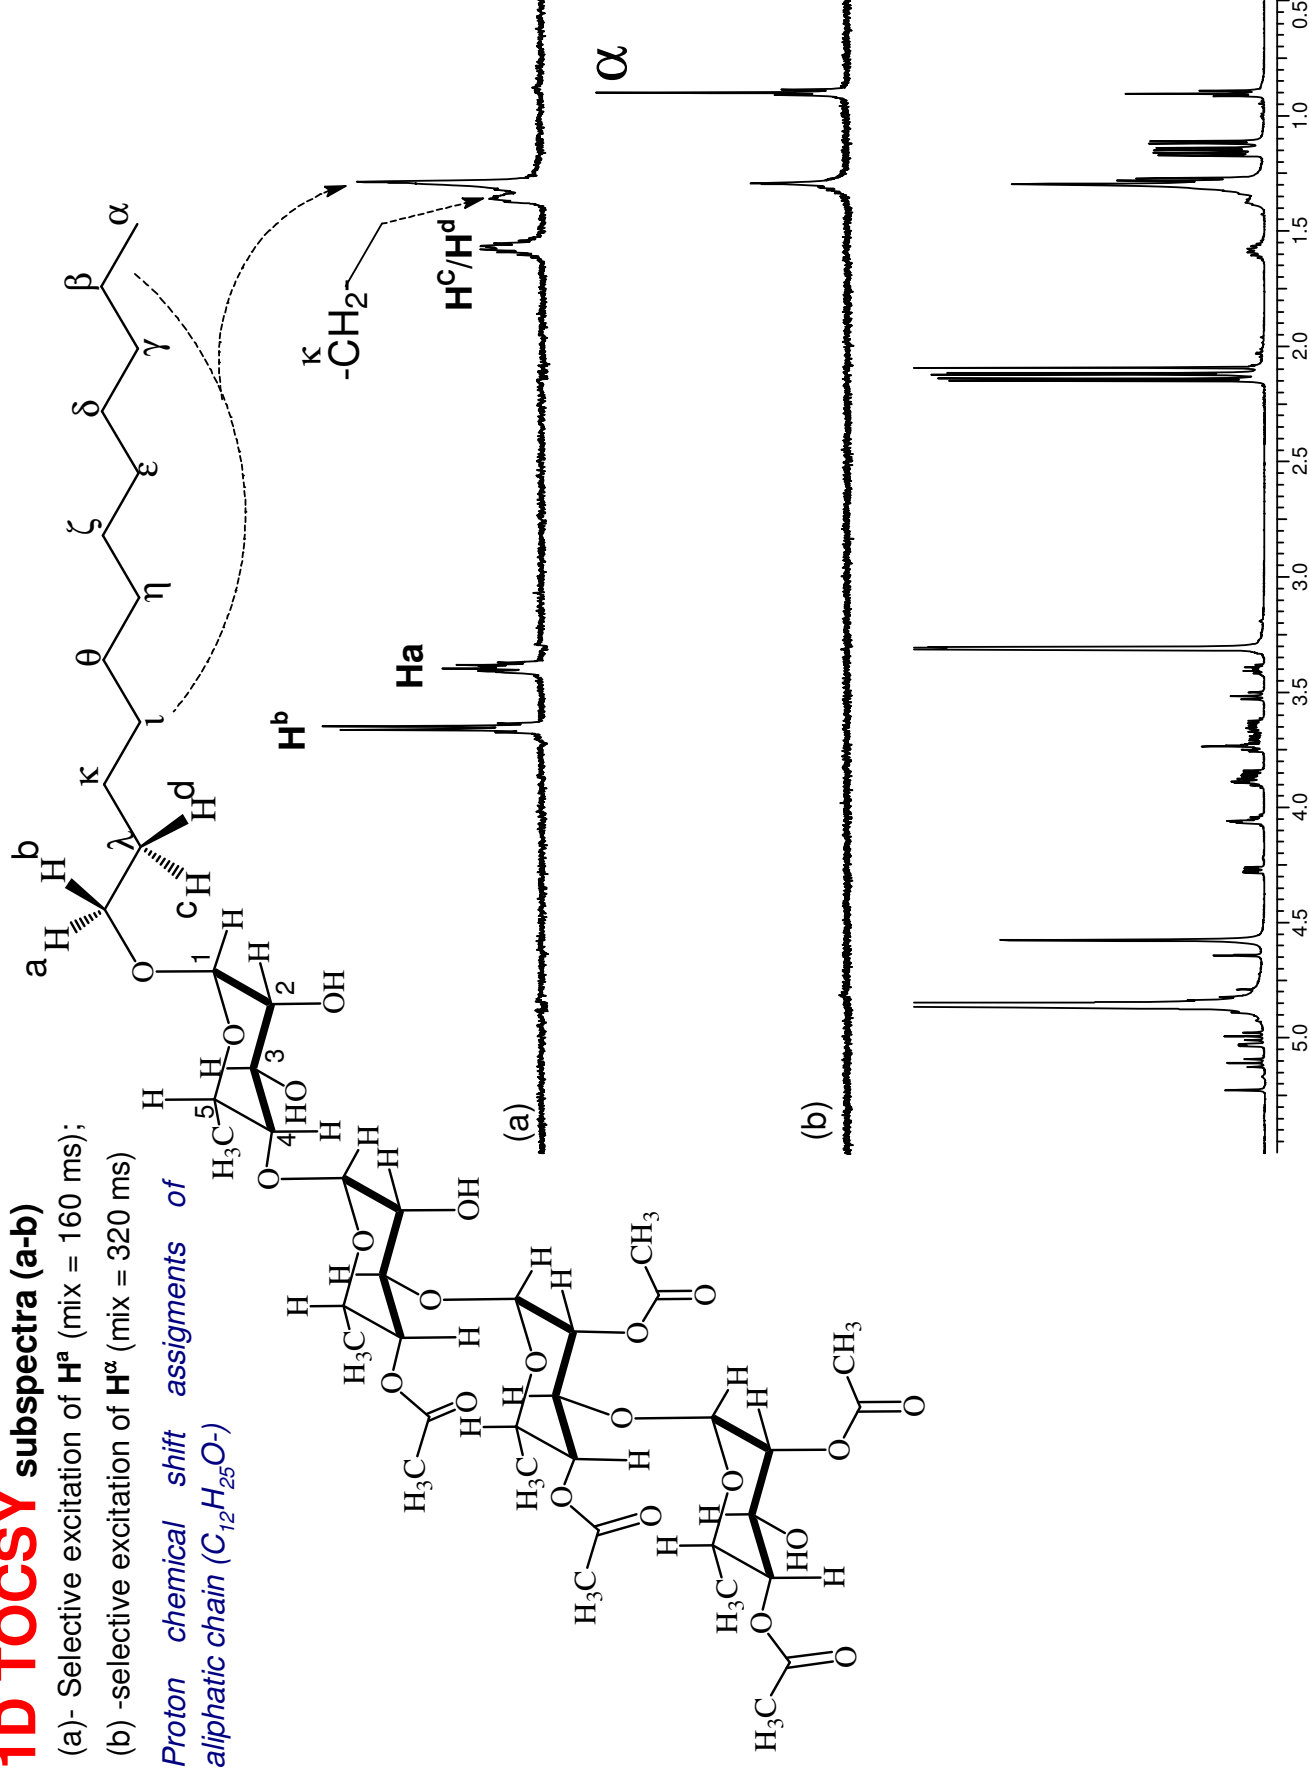



Observed **key three-bond HMBC correlations** confirms connectivity between four sugar units (A-D)

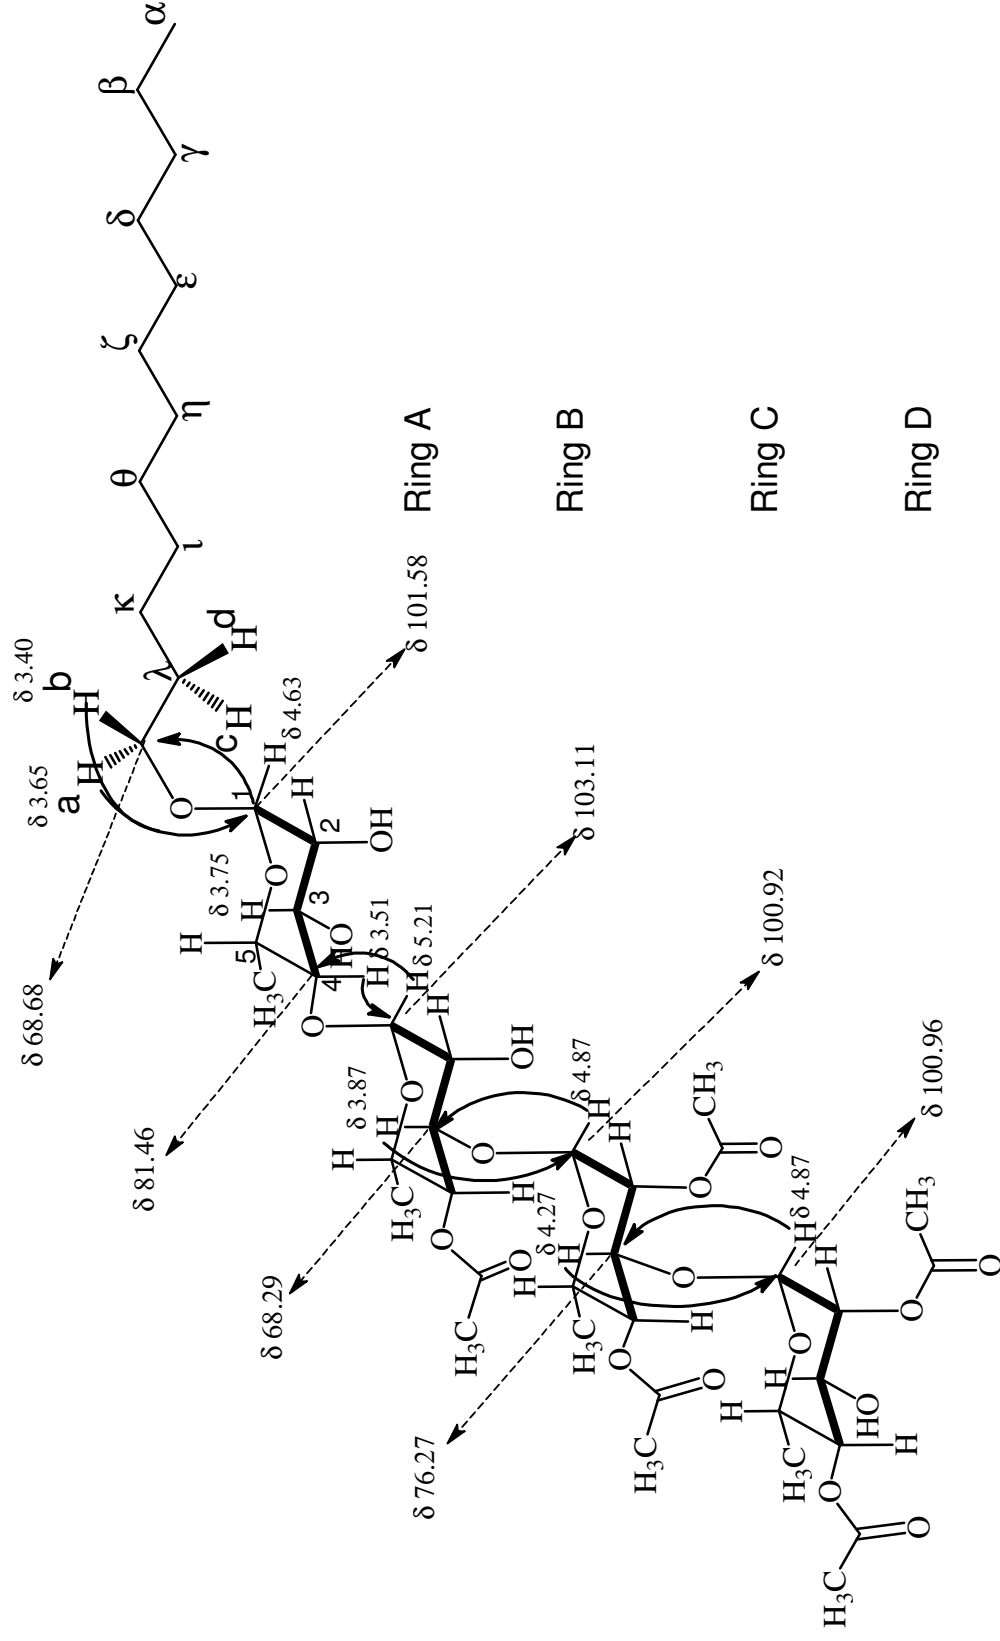

**Gradient selected HMBC spectrum  
of Cleistetroside**

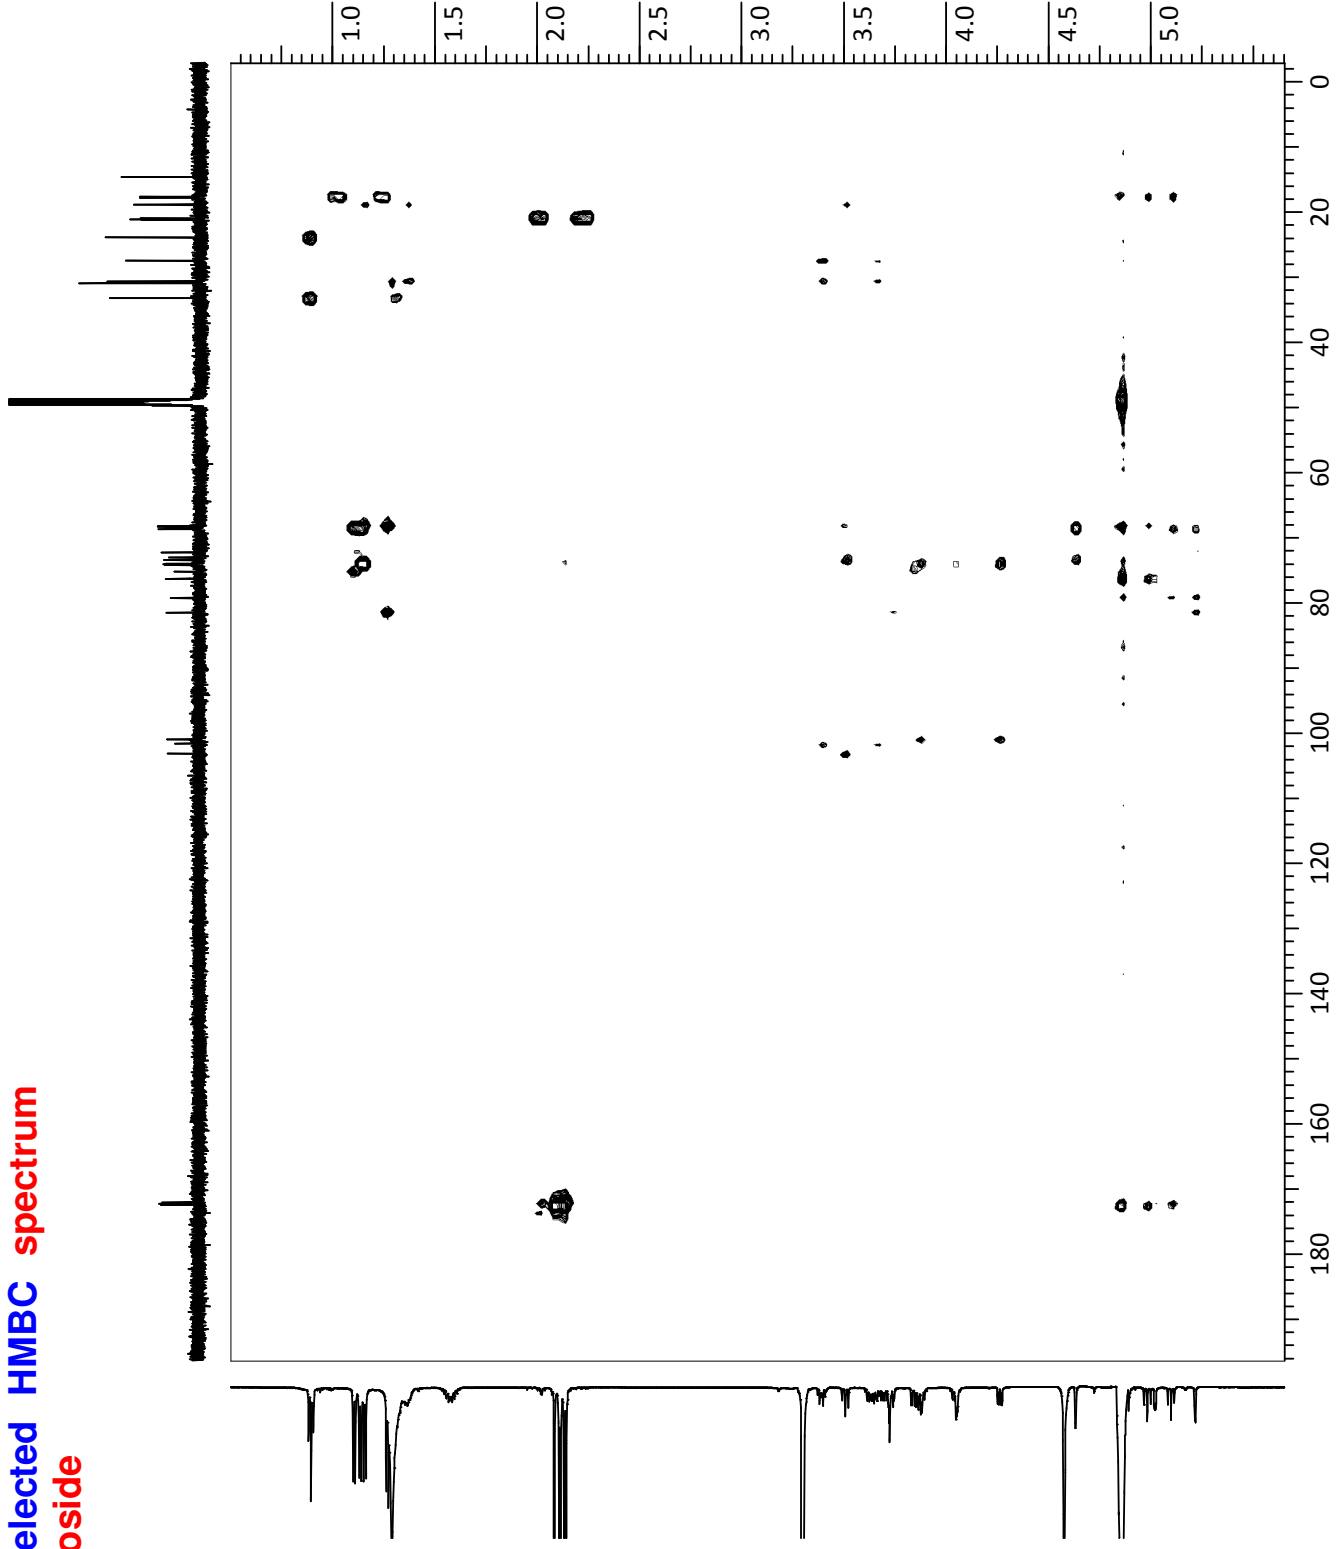

# Gradient selected HMQC spectrum of Cleistetroside

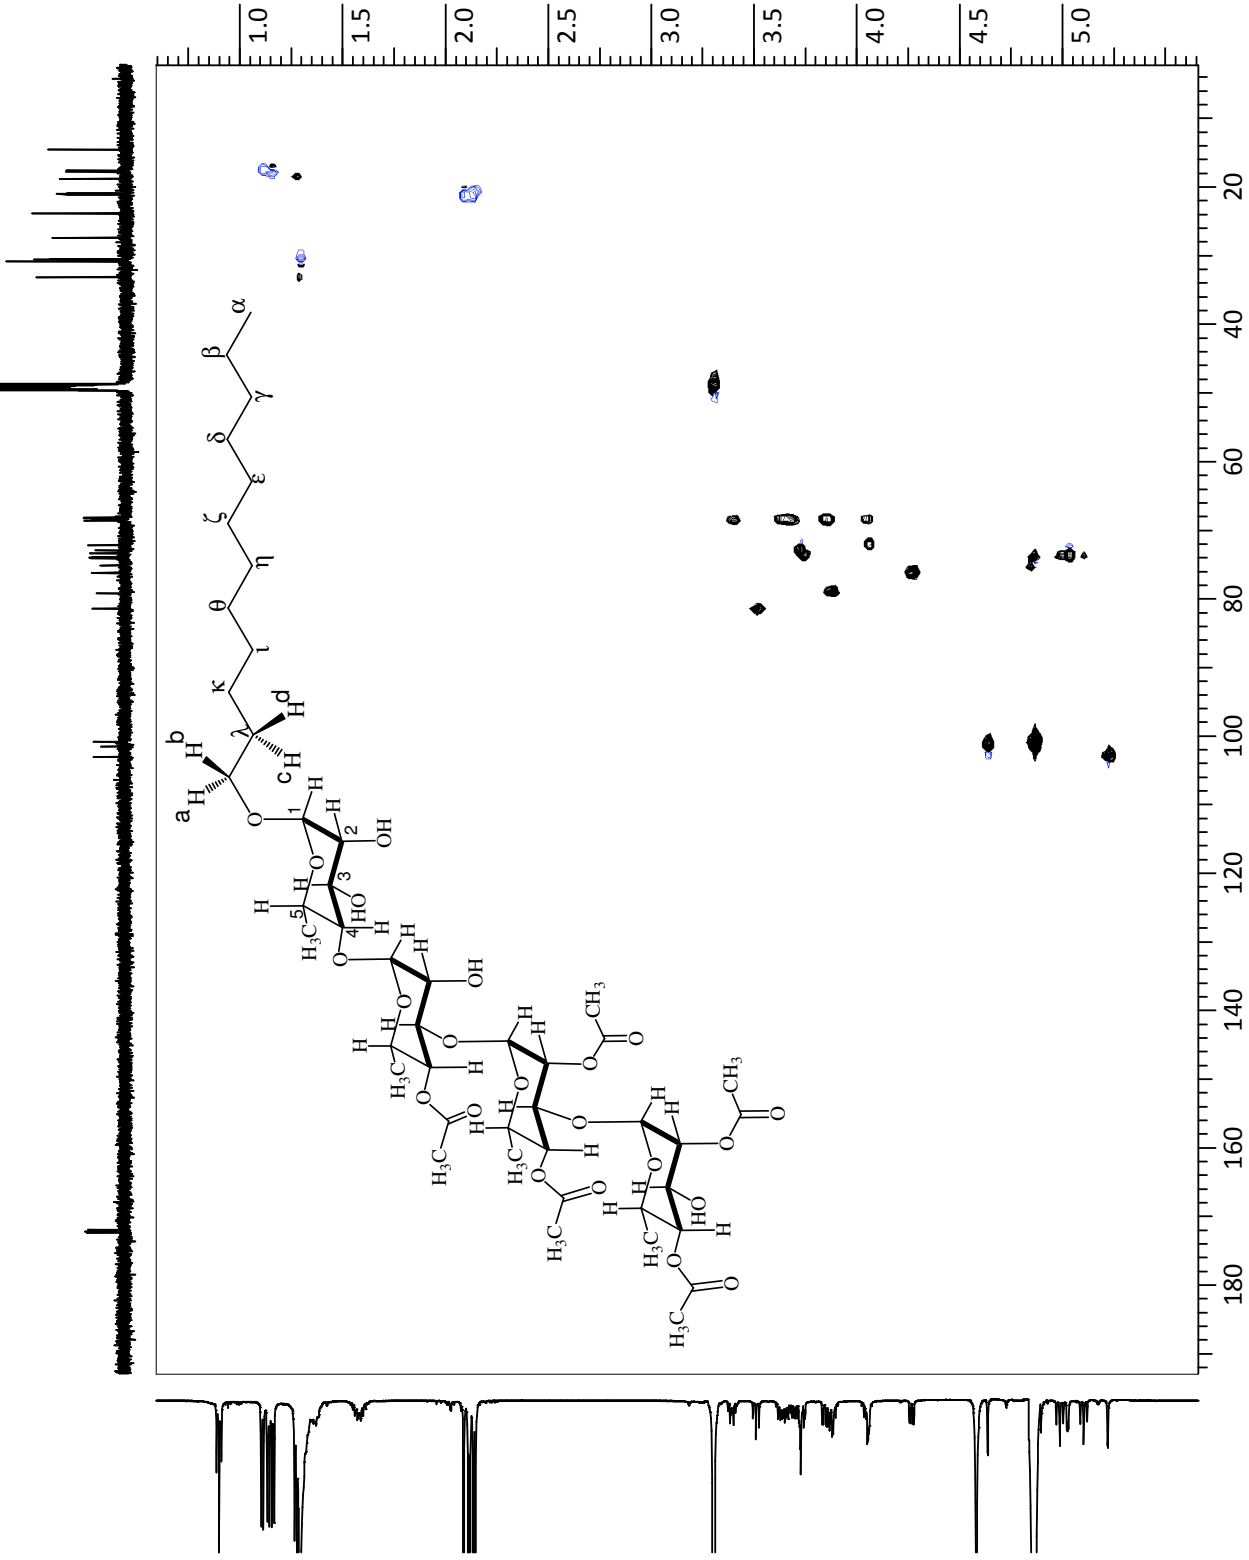

**One-bond correlations: HETCOR**  
**spectrum of Cleistetroside**

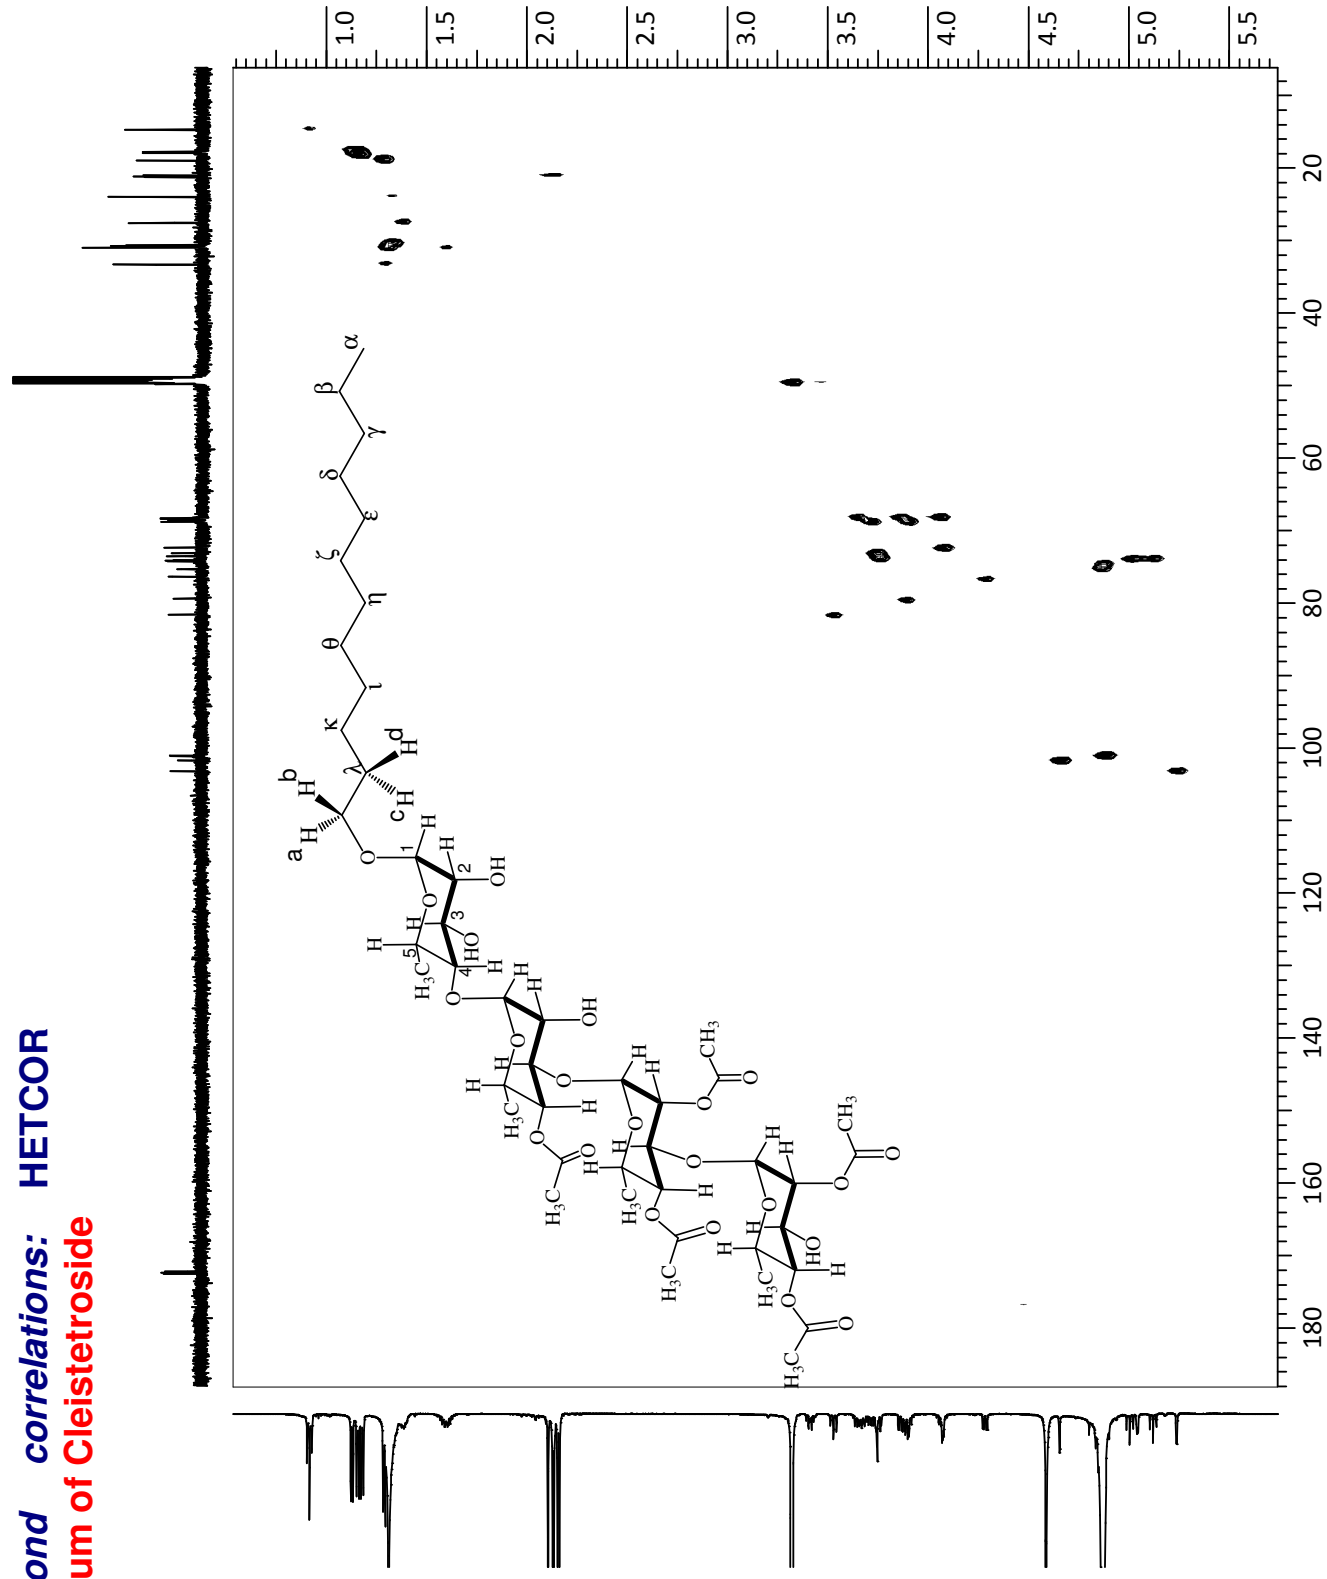

**Gradient selected COSY spectrum of  
Cleistetroside**

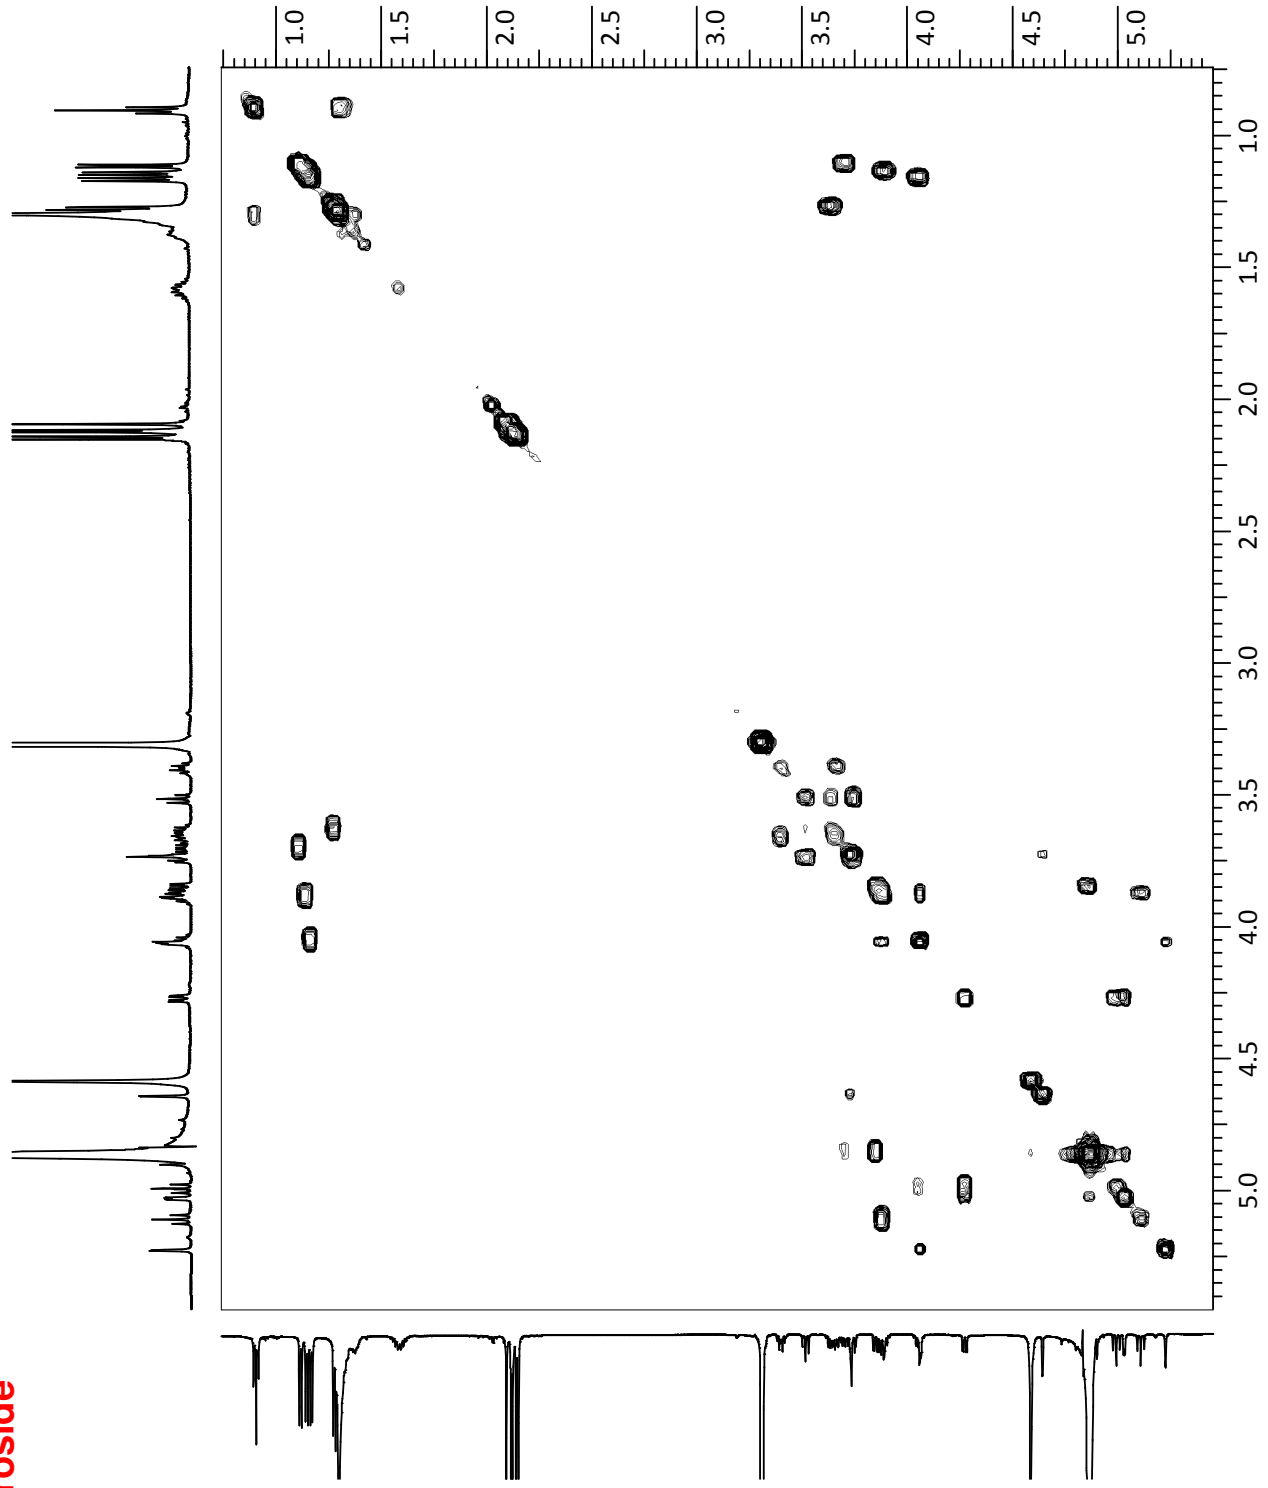

Expanded portion of the **gCOSY** spectrum of Cleistetroside

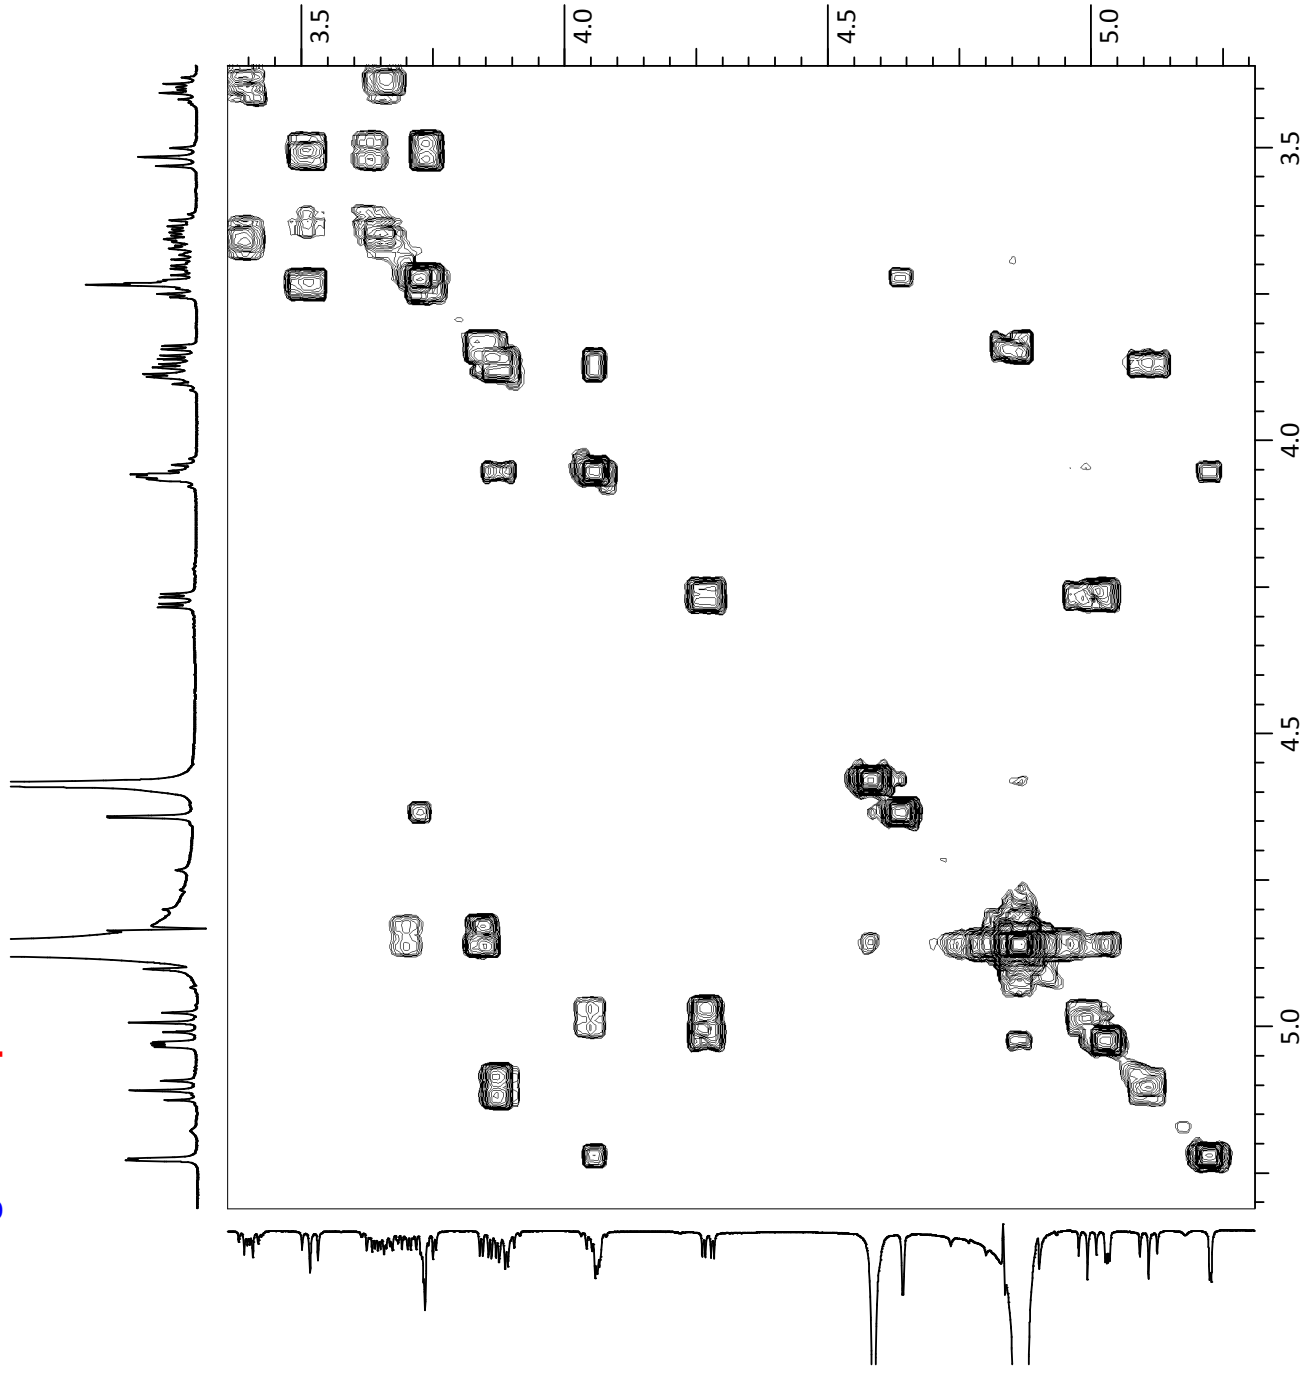

**Gradient selected double quantum  
DQCOSY spectrum of Cleistetroside**

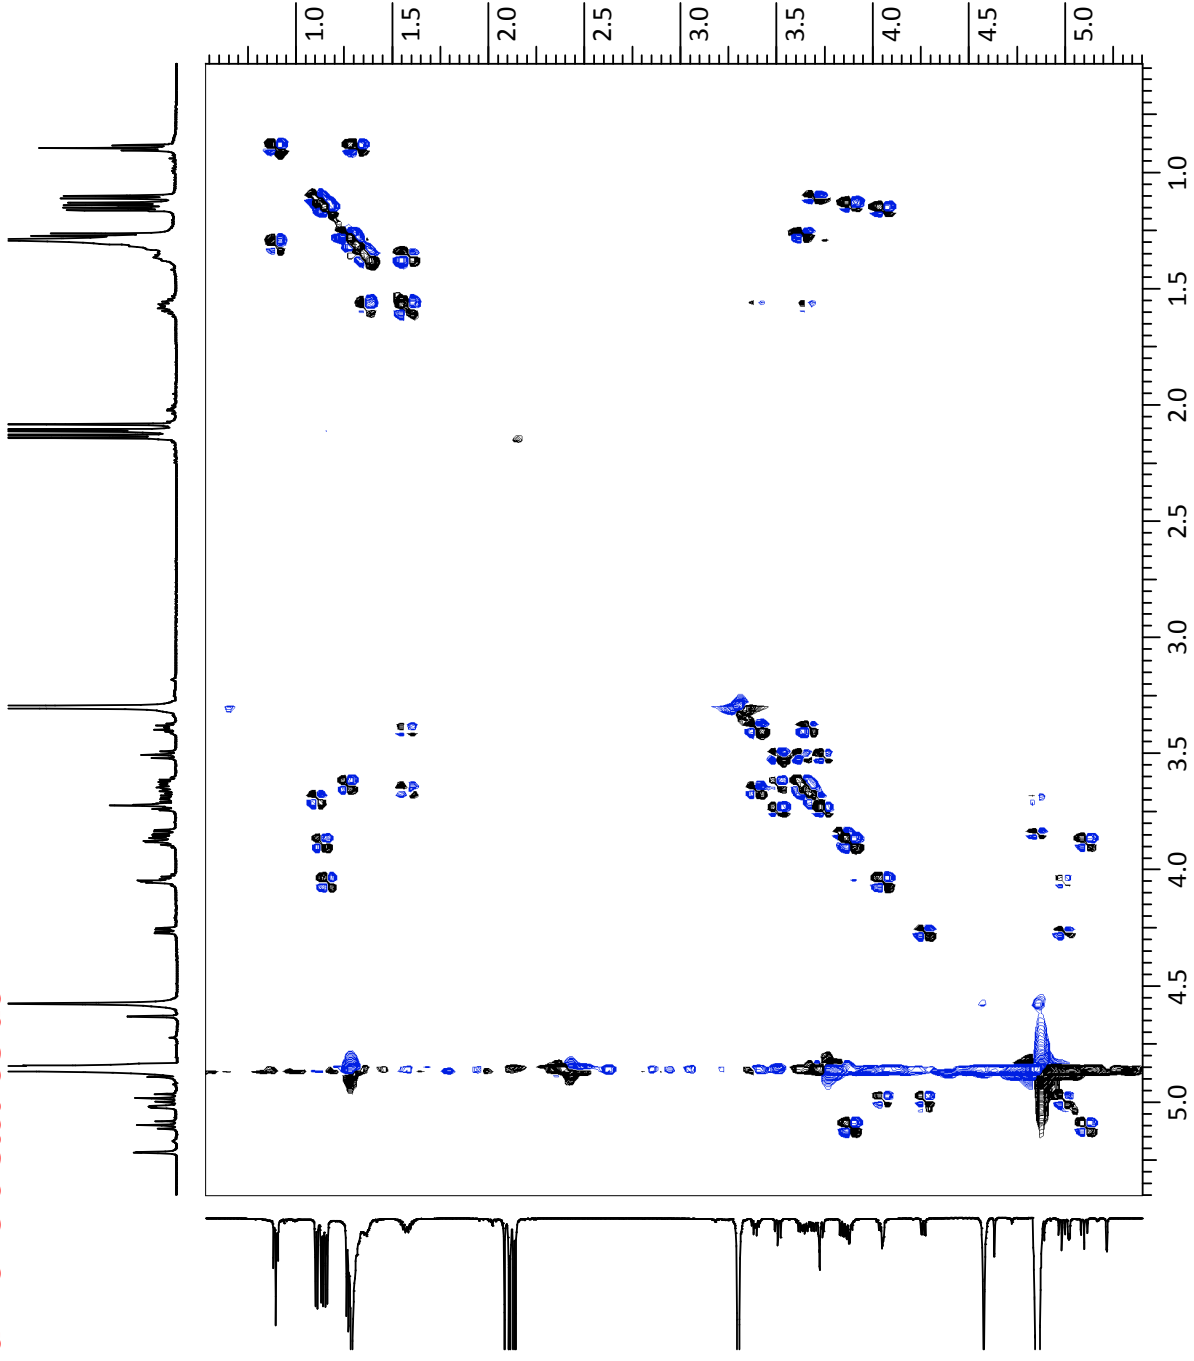

Expansion of the contour plot of the DQCOSY spectrum

Gradient selected double quantum  
DQCOSY spectrum of Cleistetroside

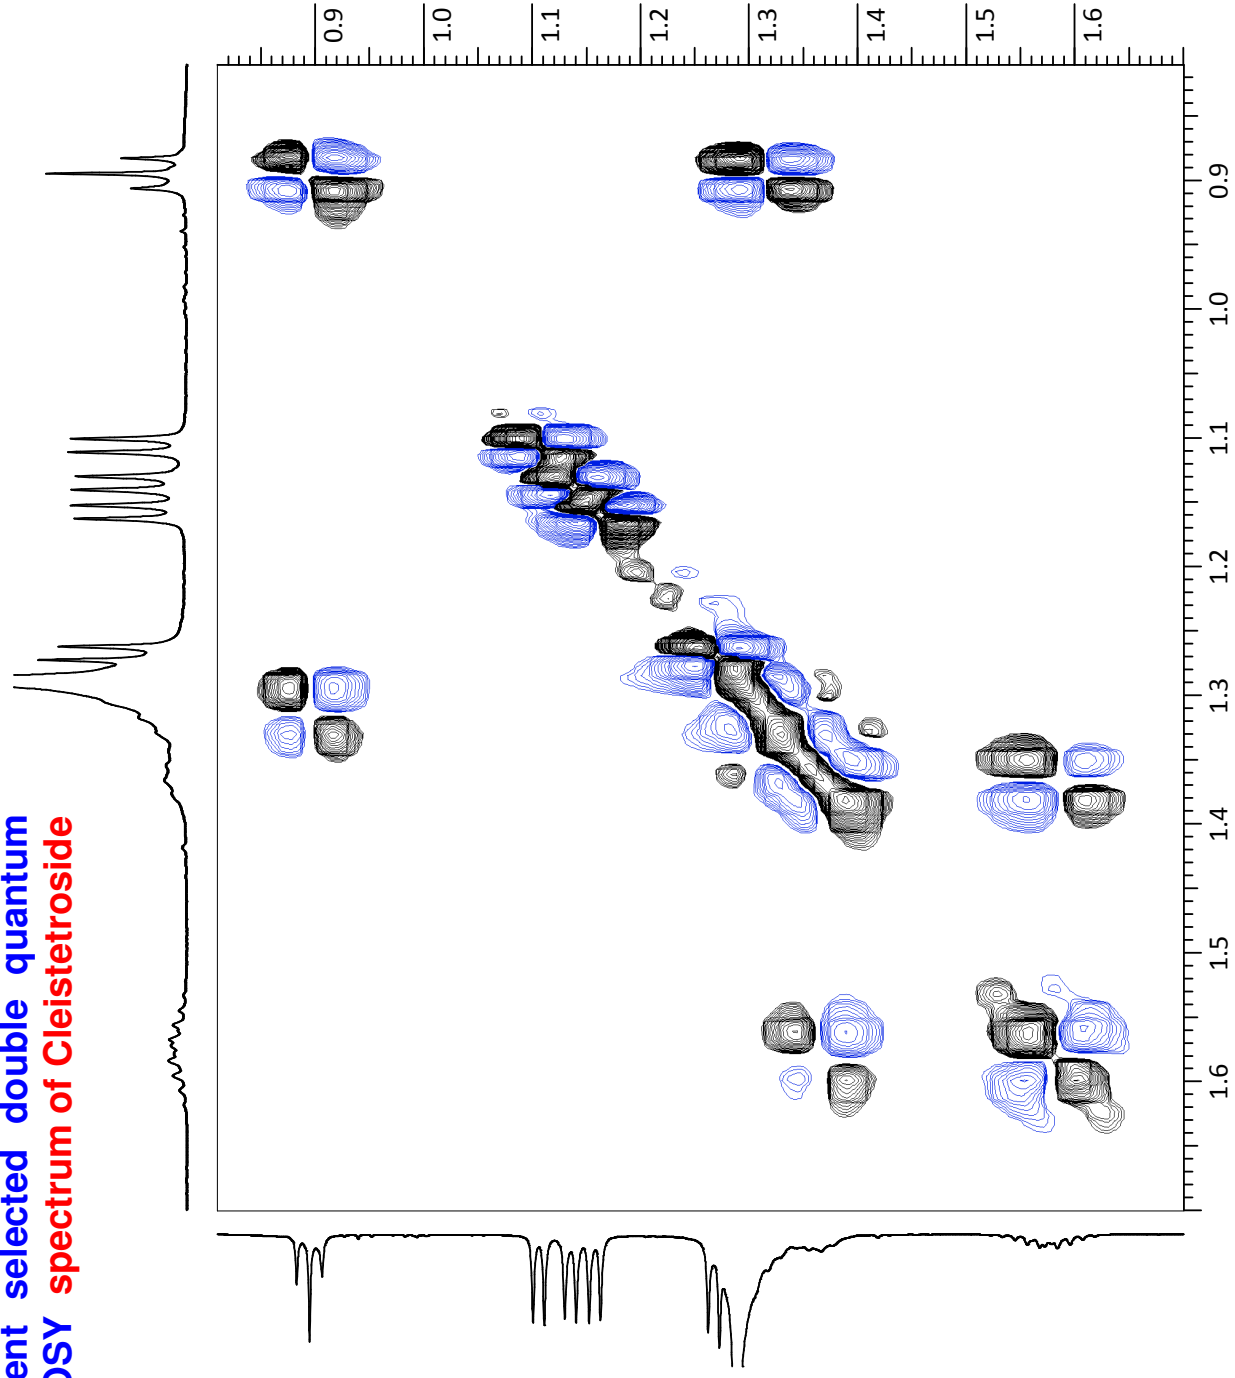



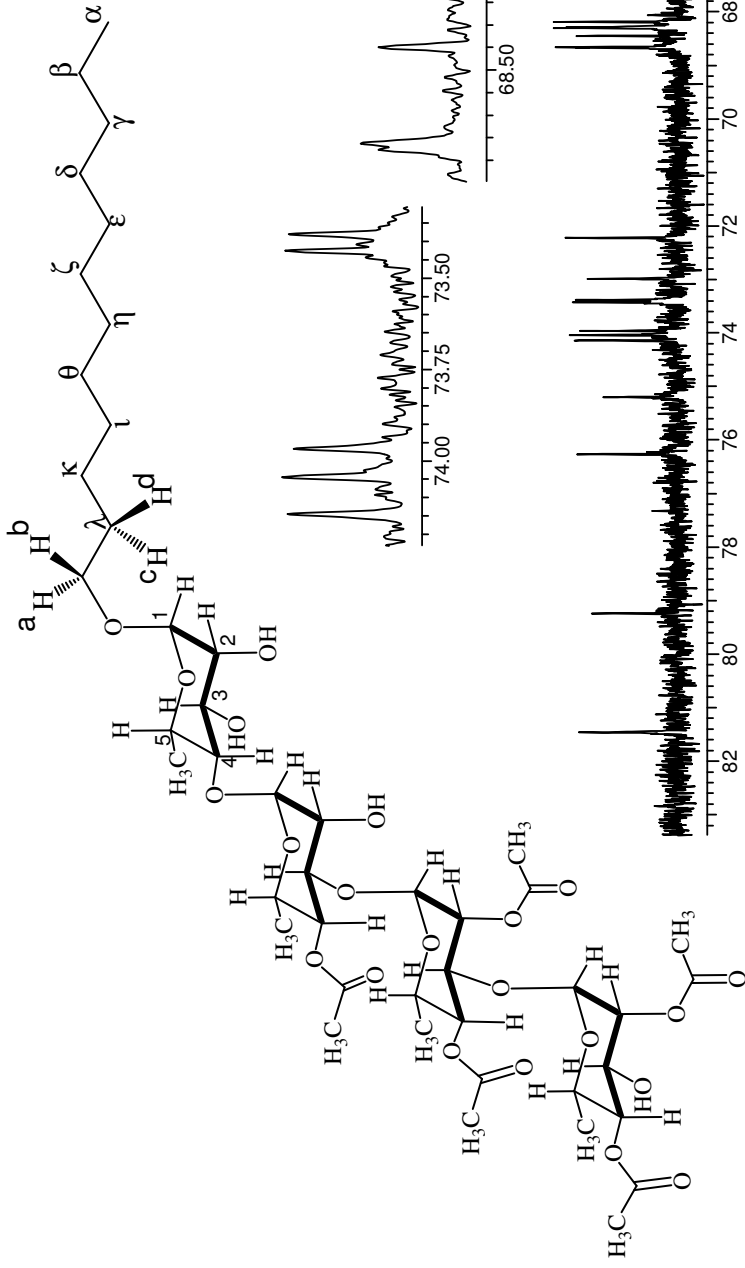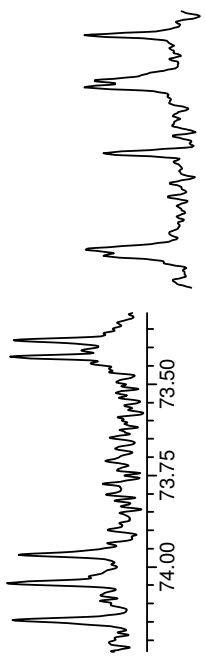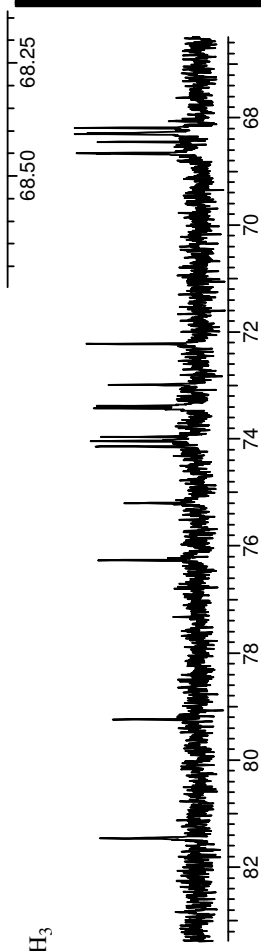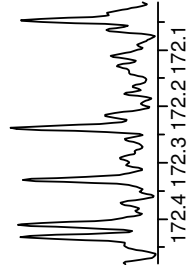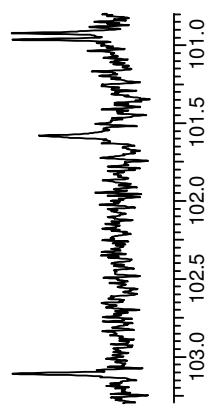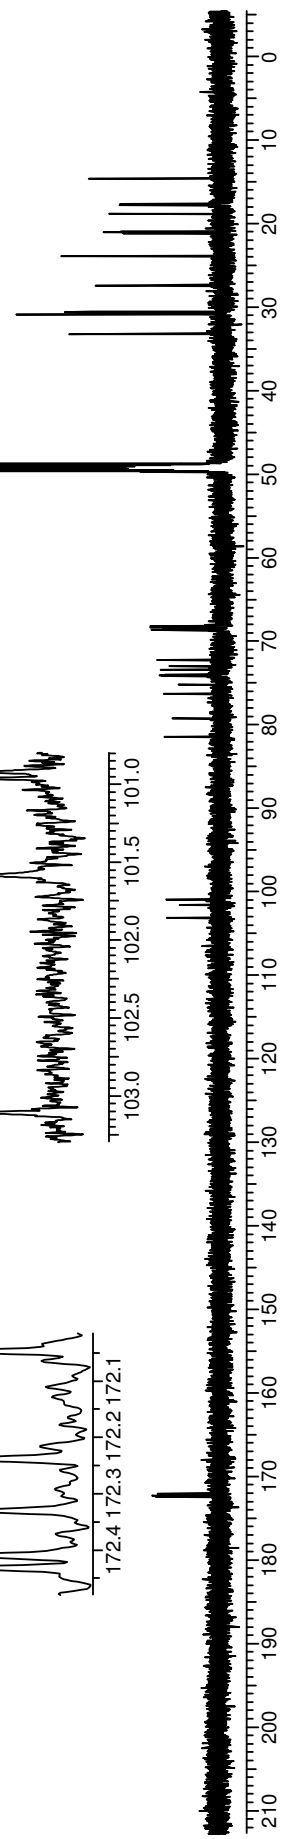

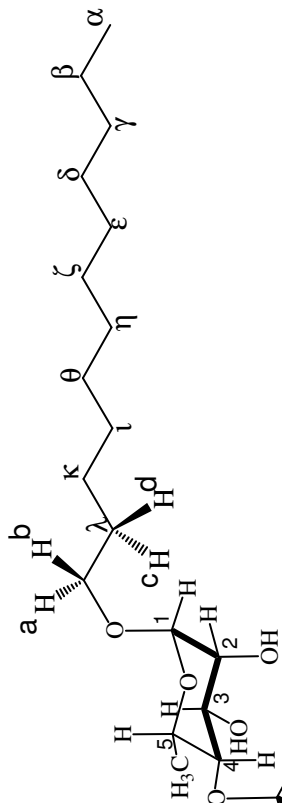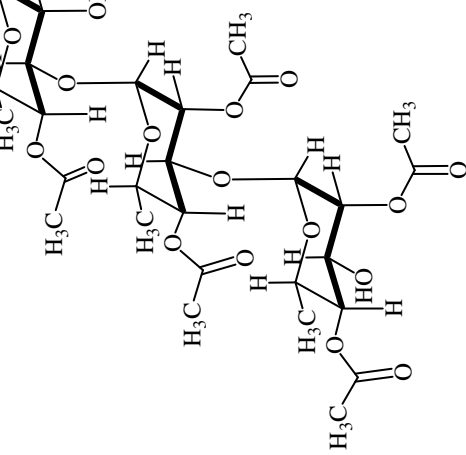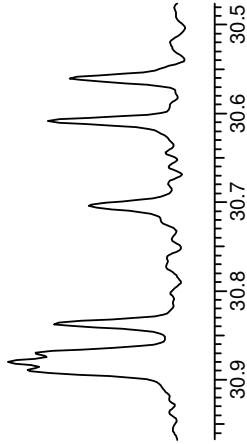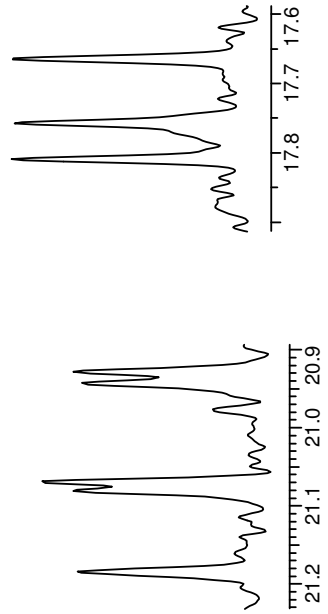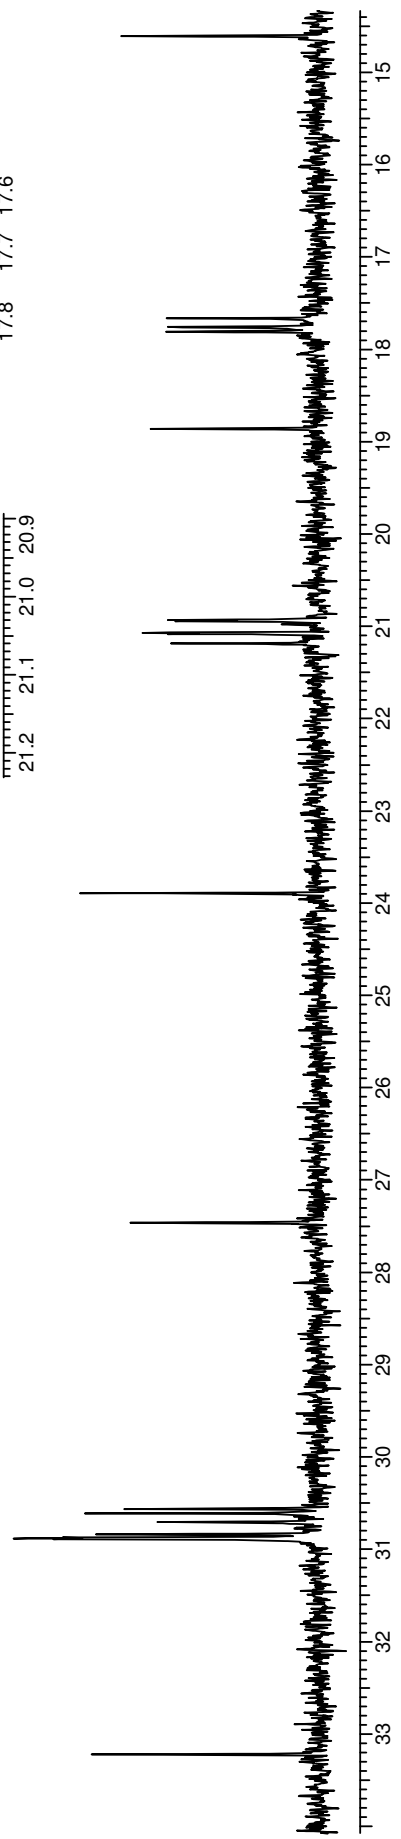

Experimental (a) and calculated (b)  $^1\text{H}$  NMR spectrum

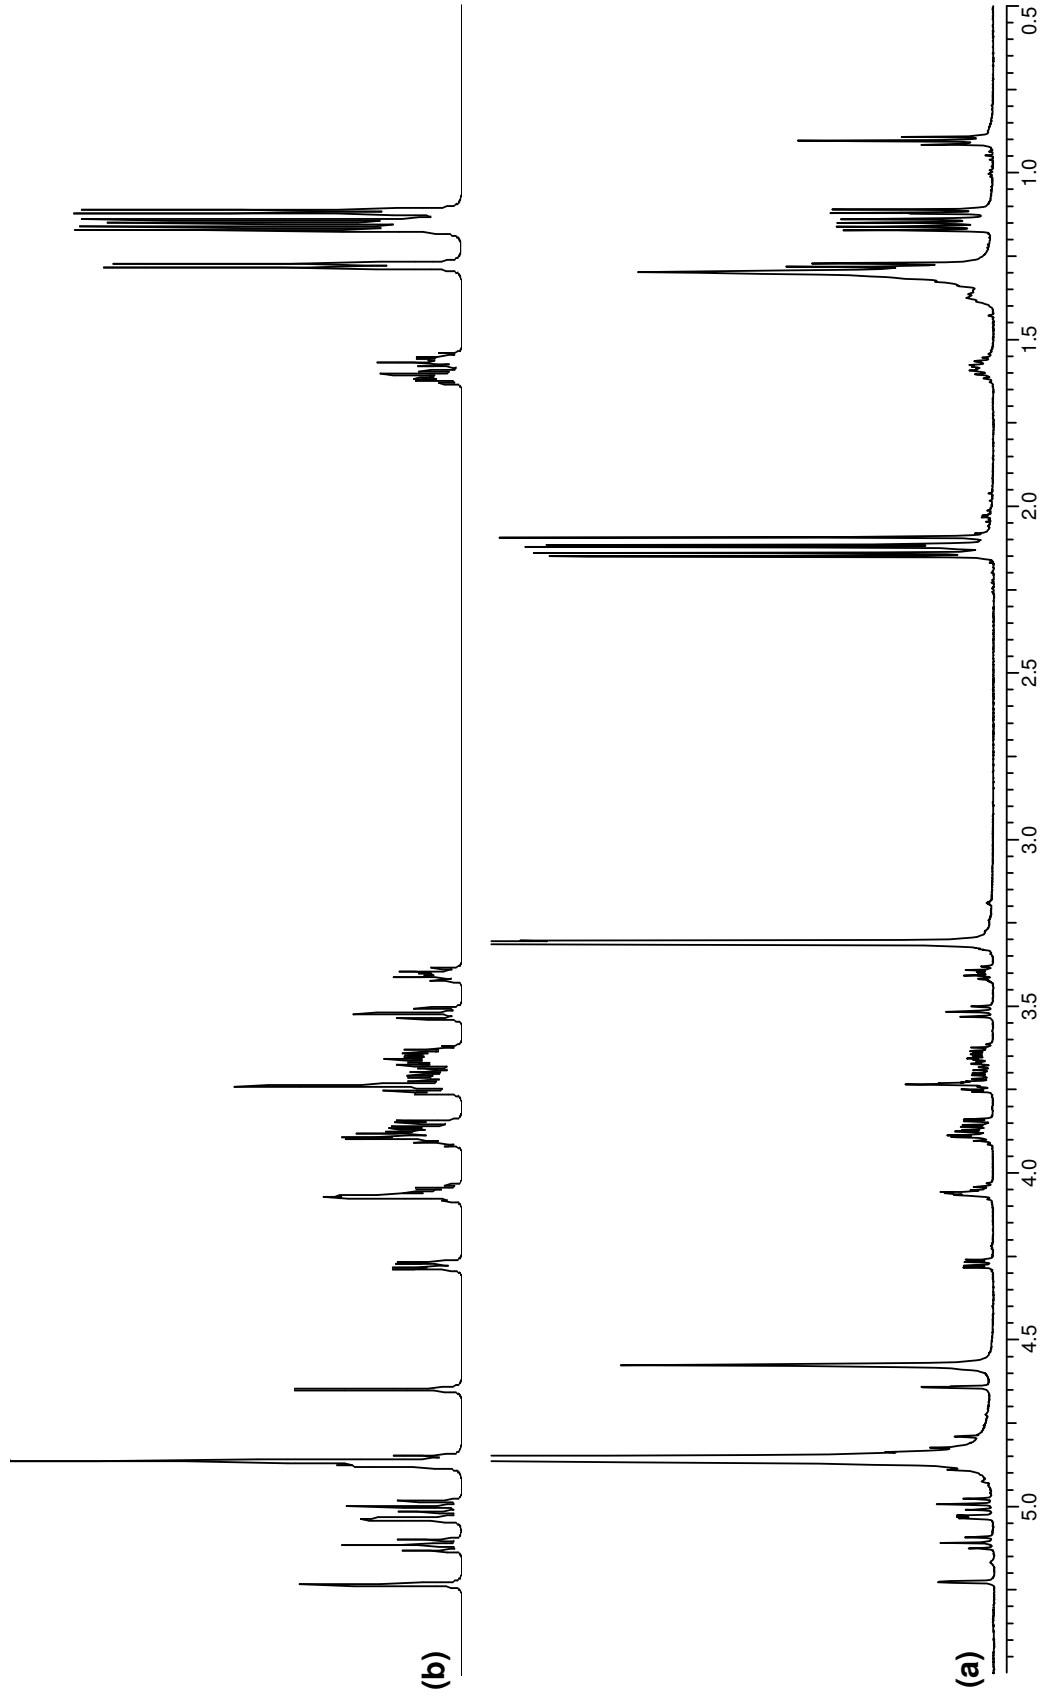

# Experimental (a) and calculated (b) $^1\text{H}$ NMR spectrum

*Expanded portion of the  $^1\text{H}$  NMR spectrum; spectral region (3.60 - 3.80 ppm)*

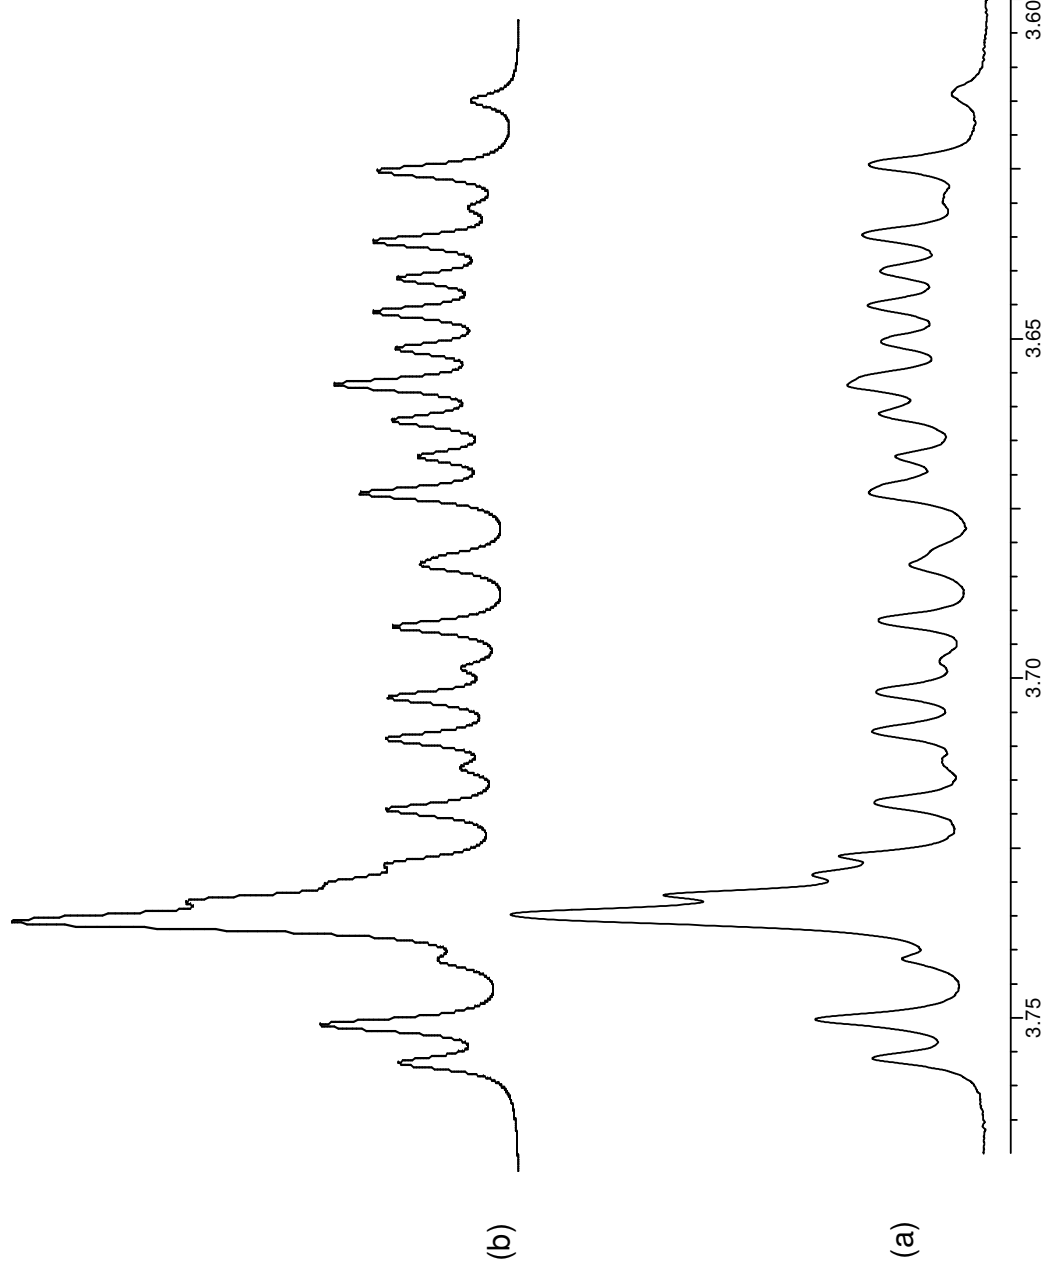

# Experimental (a) and calculated (b) $^1\text{H}$ NMR spectrum

Expanded portion of the  $^1\text{H}$  NMR spectrum; spectral region (3.361 - 4.332 ppm)

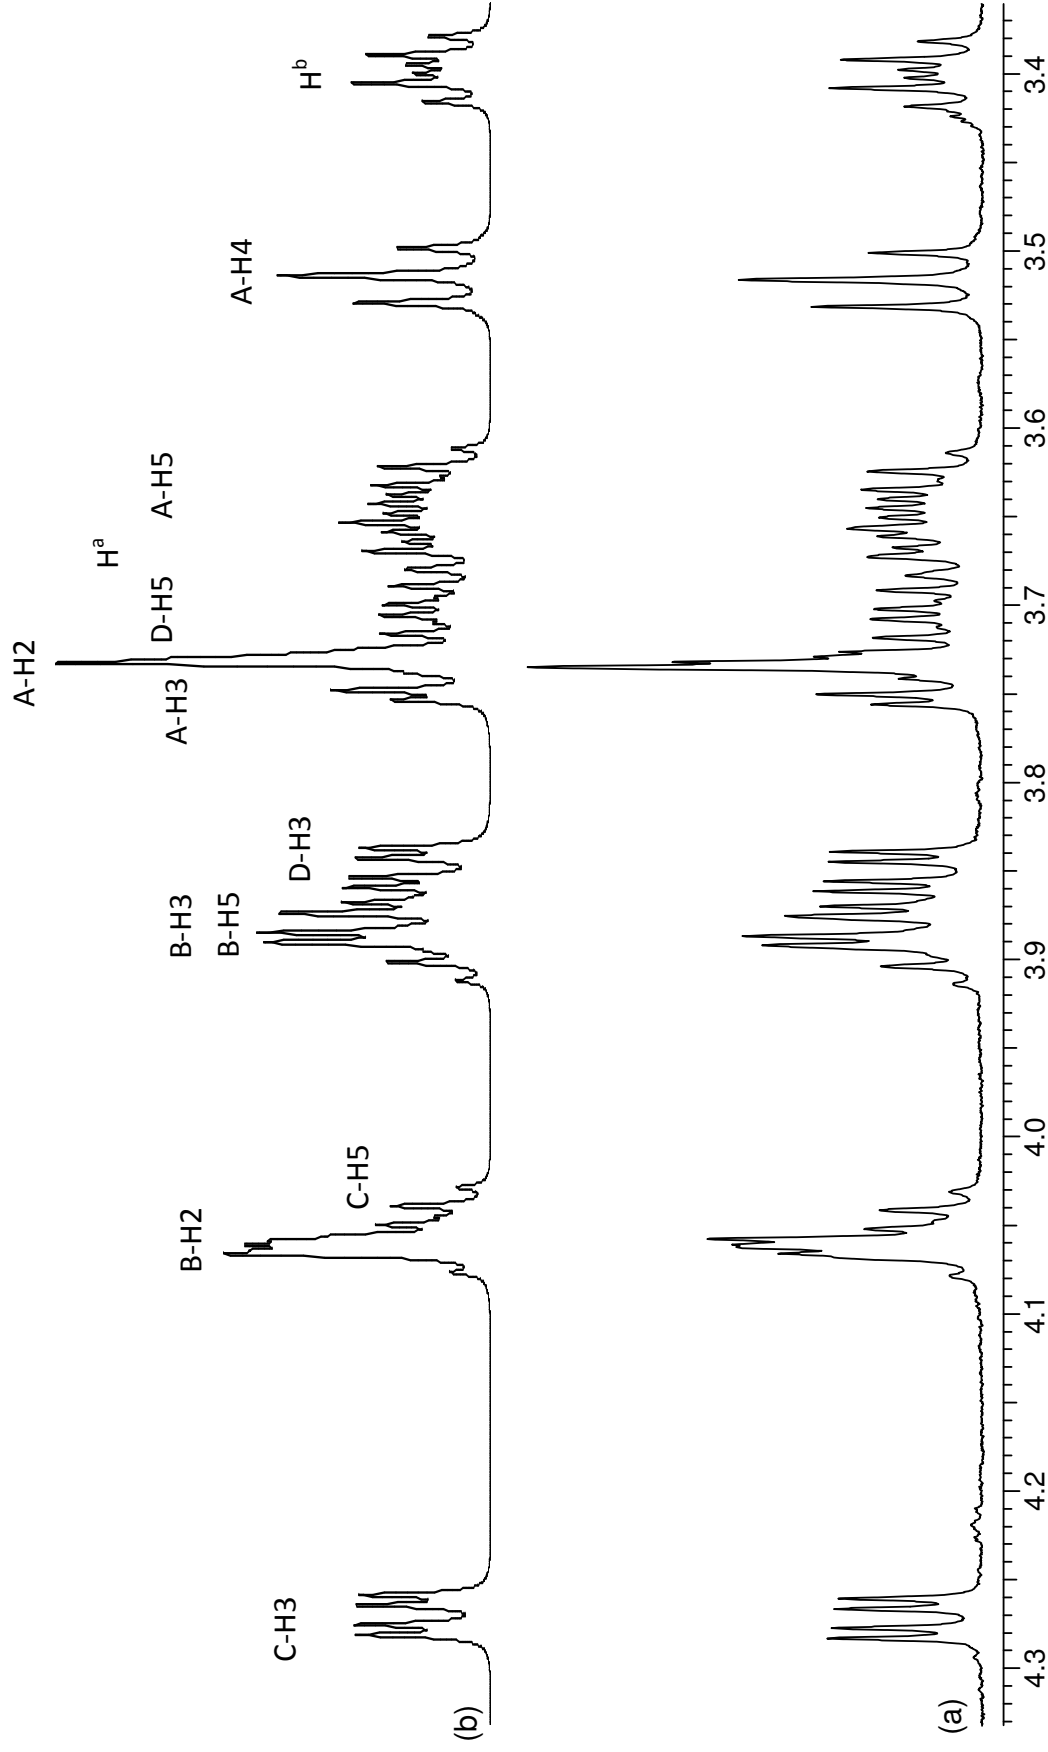

# Experimental (a) and calculated (b) $^1\text{H}$ NMR spectrum

Expanded portion of the  $^1\text{H}$  NMR spectrum; spectral region (3.8 - 4.1 ppm)

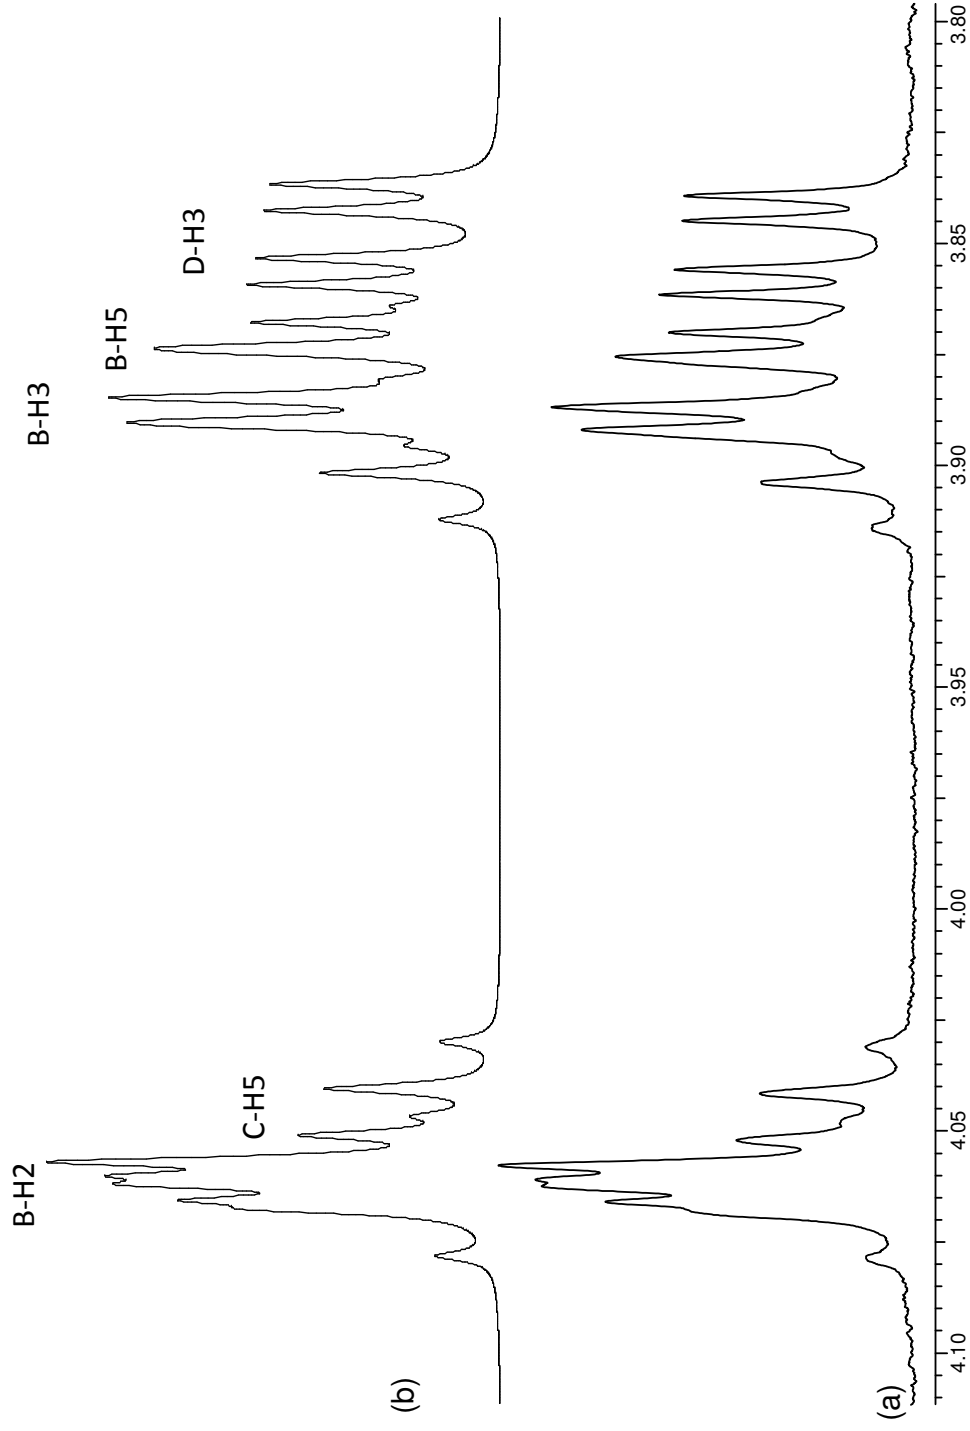

# Experimental (a) and calculated (b) $^1\text{H}$ NMR spectrum

Expanded portion of the  $^1\text{H}$  NMR spectrum; spectral region (4.810 - 5.2576 ppm)

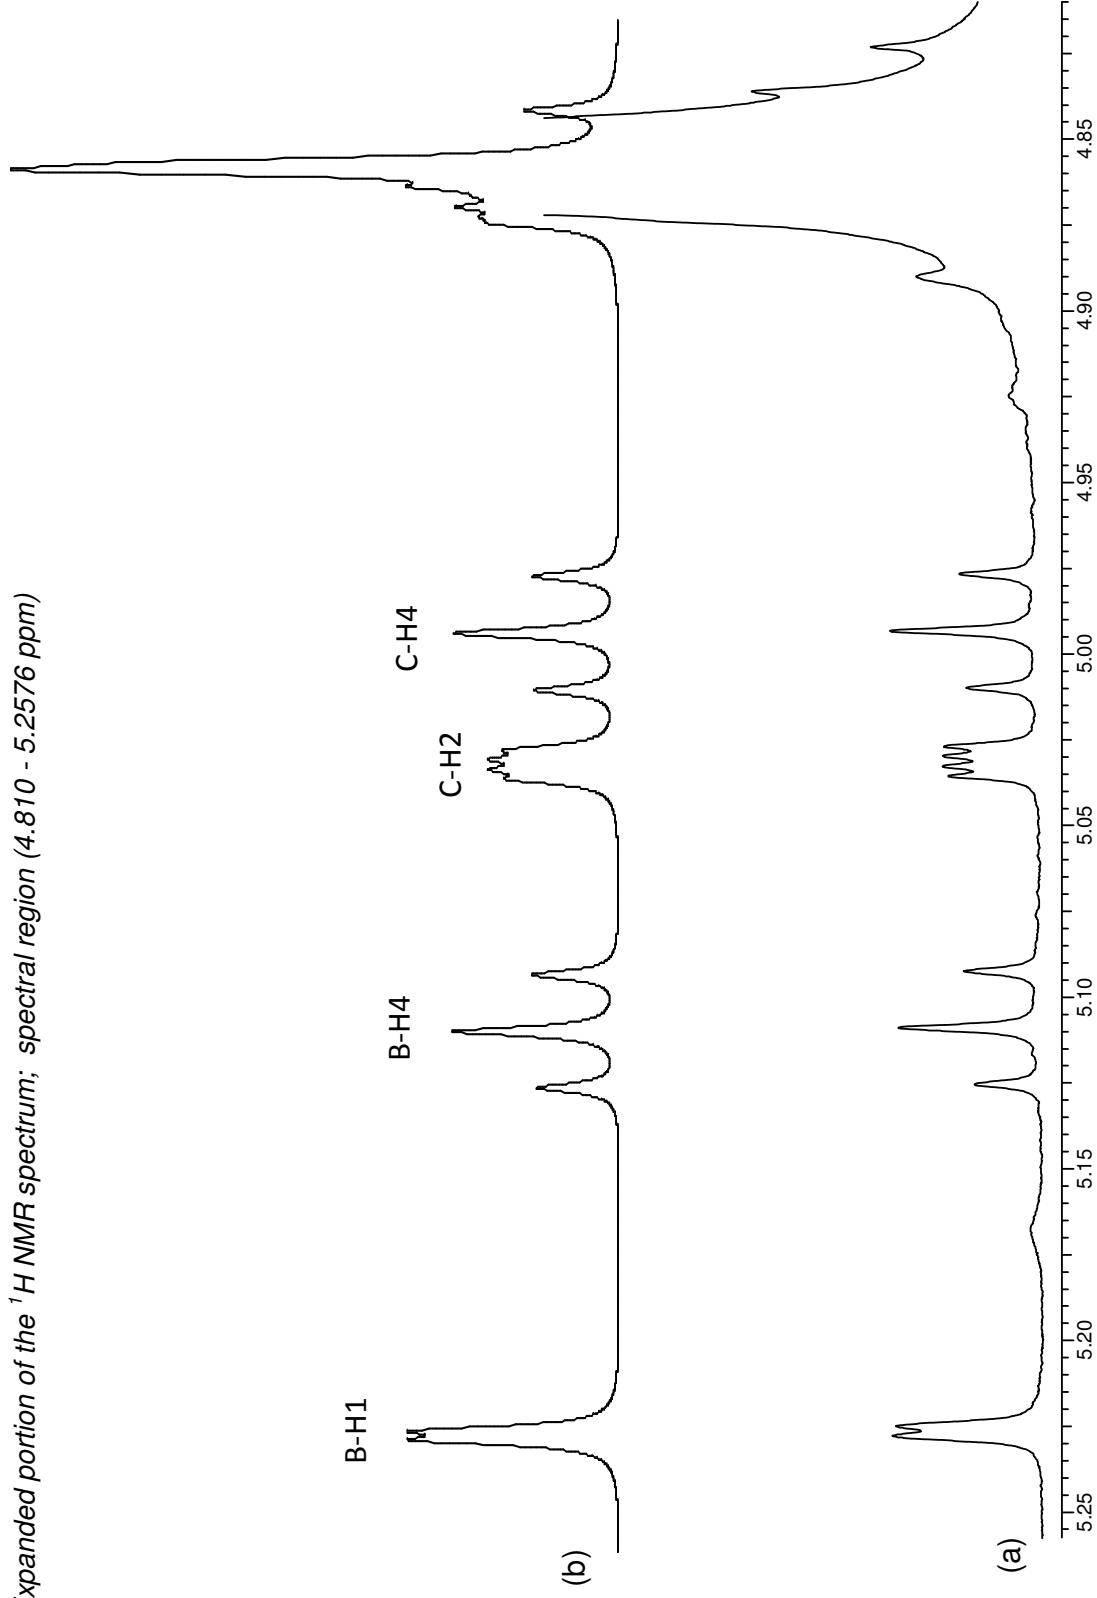

**Calculated (a) and experimental (b)  $^1\text{H}$  NMR spectrum (spectral region: 3.344 - 5.293 ppm)**

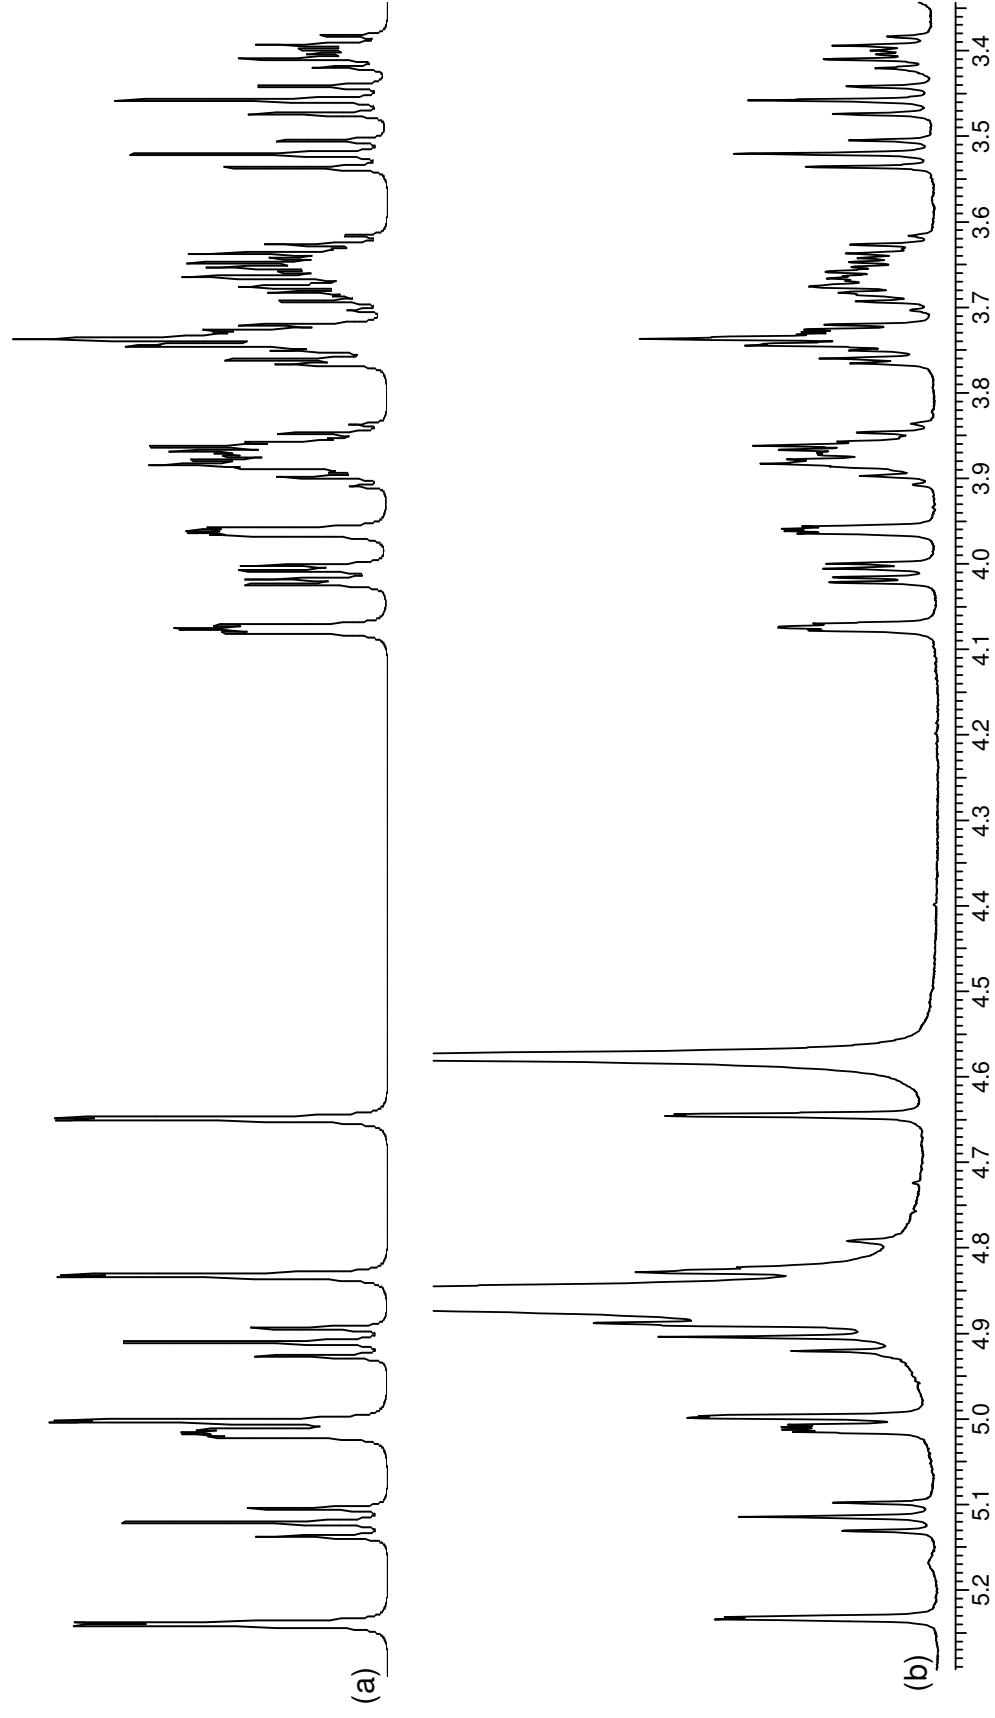



Calculated (a) and experimental (b)  $^1\text{H}$  NMR spectrum (spectral region: 3.348 - 4.124 ppm)

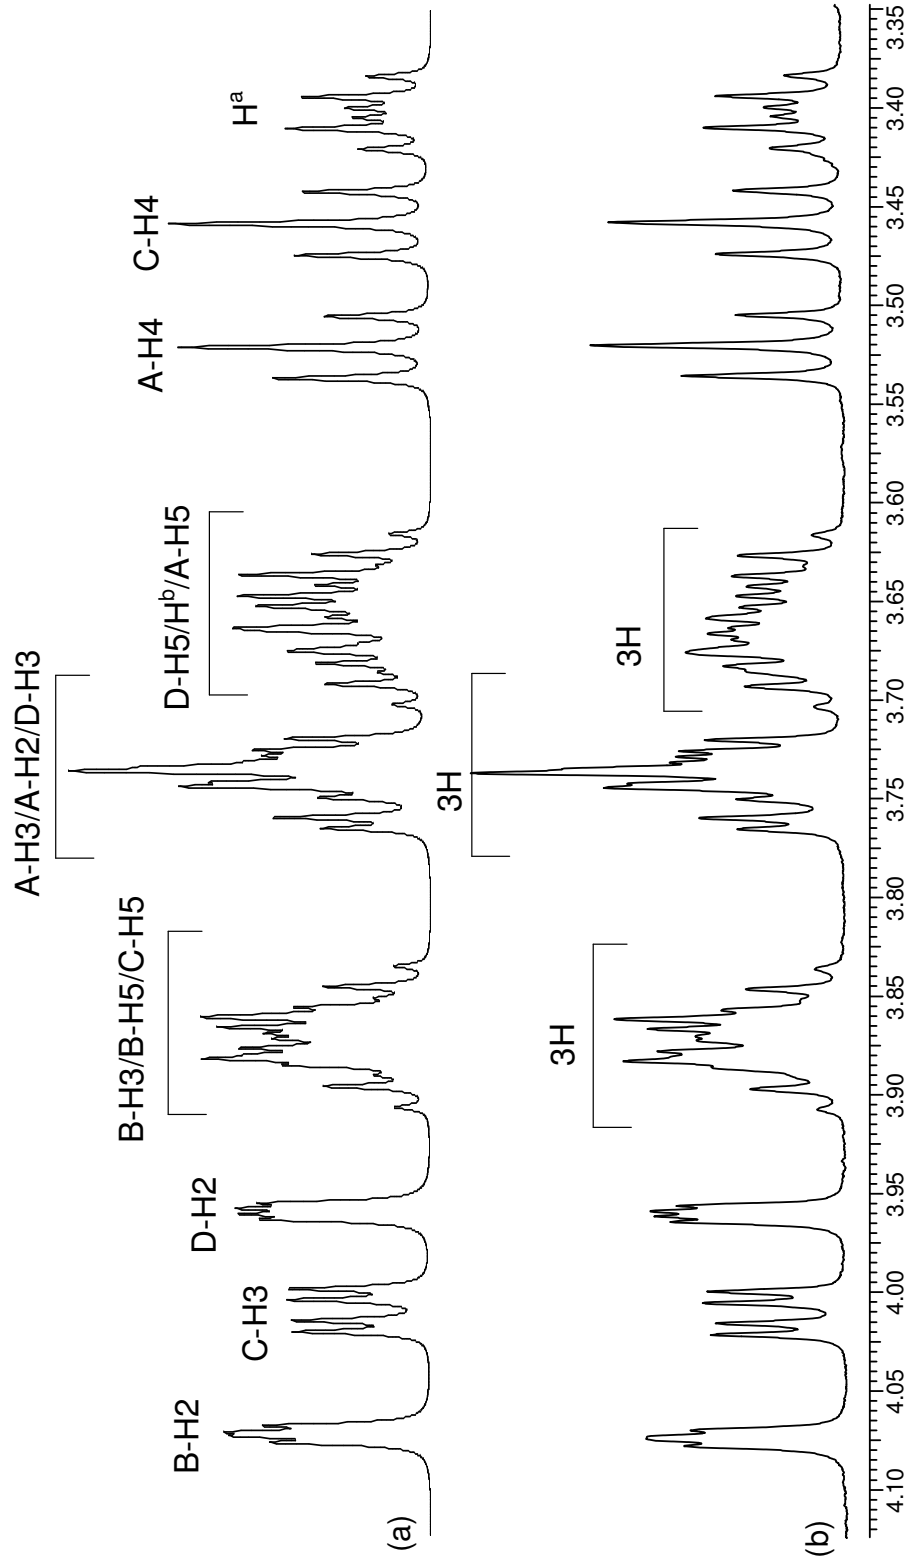

Calculated (a) and experimental (b)  $^1\text{H}$  NMR spectrum (spectral region: 4.6133 - 5.2933 ppm)

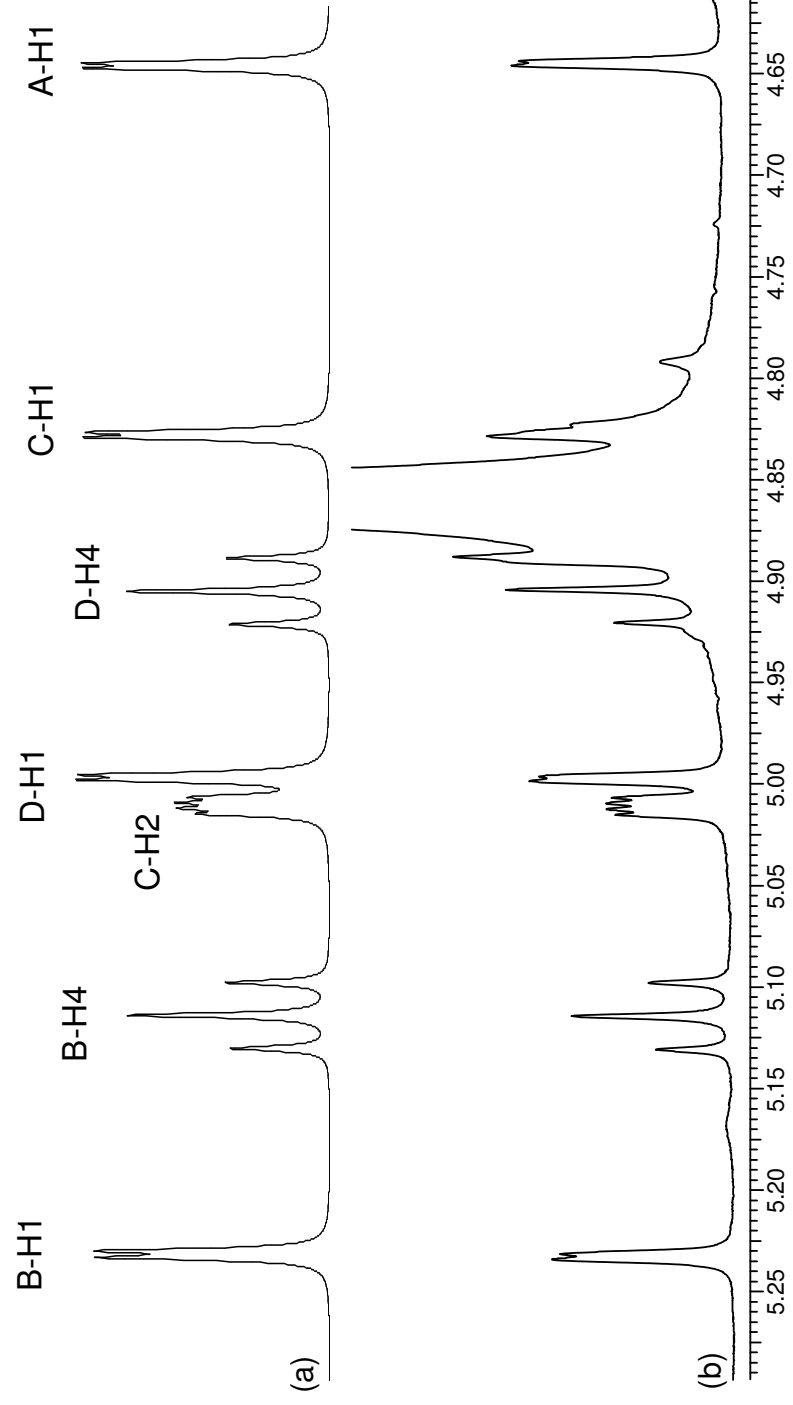

# $^1\text{H}$ NMR spectrum of cleistrotroside-3 in $\text{CD}_3\text{OD}$

Formula:  $\text{C}_{44}\text{H}_{74}\text{O}_{21}$

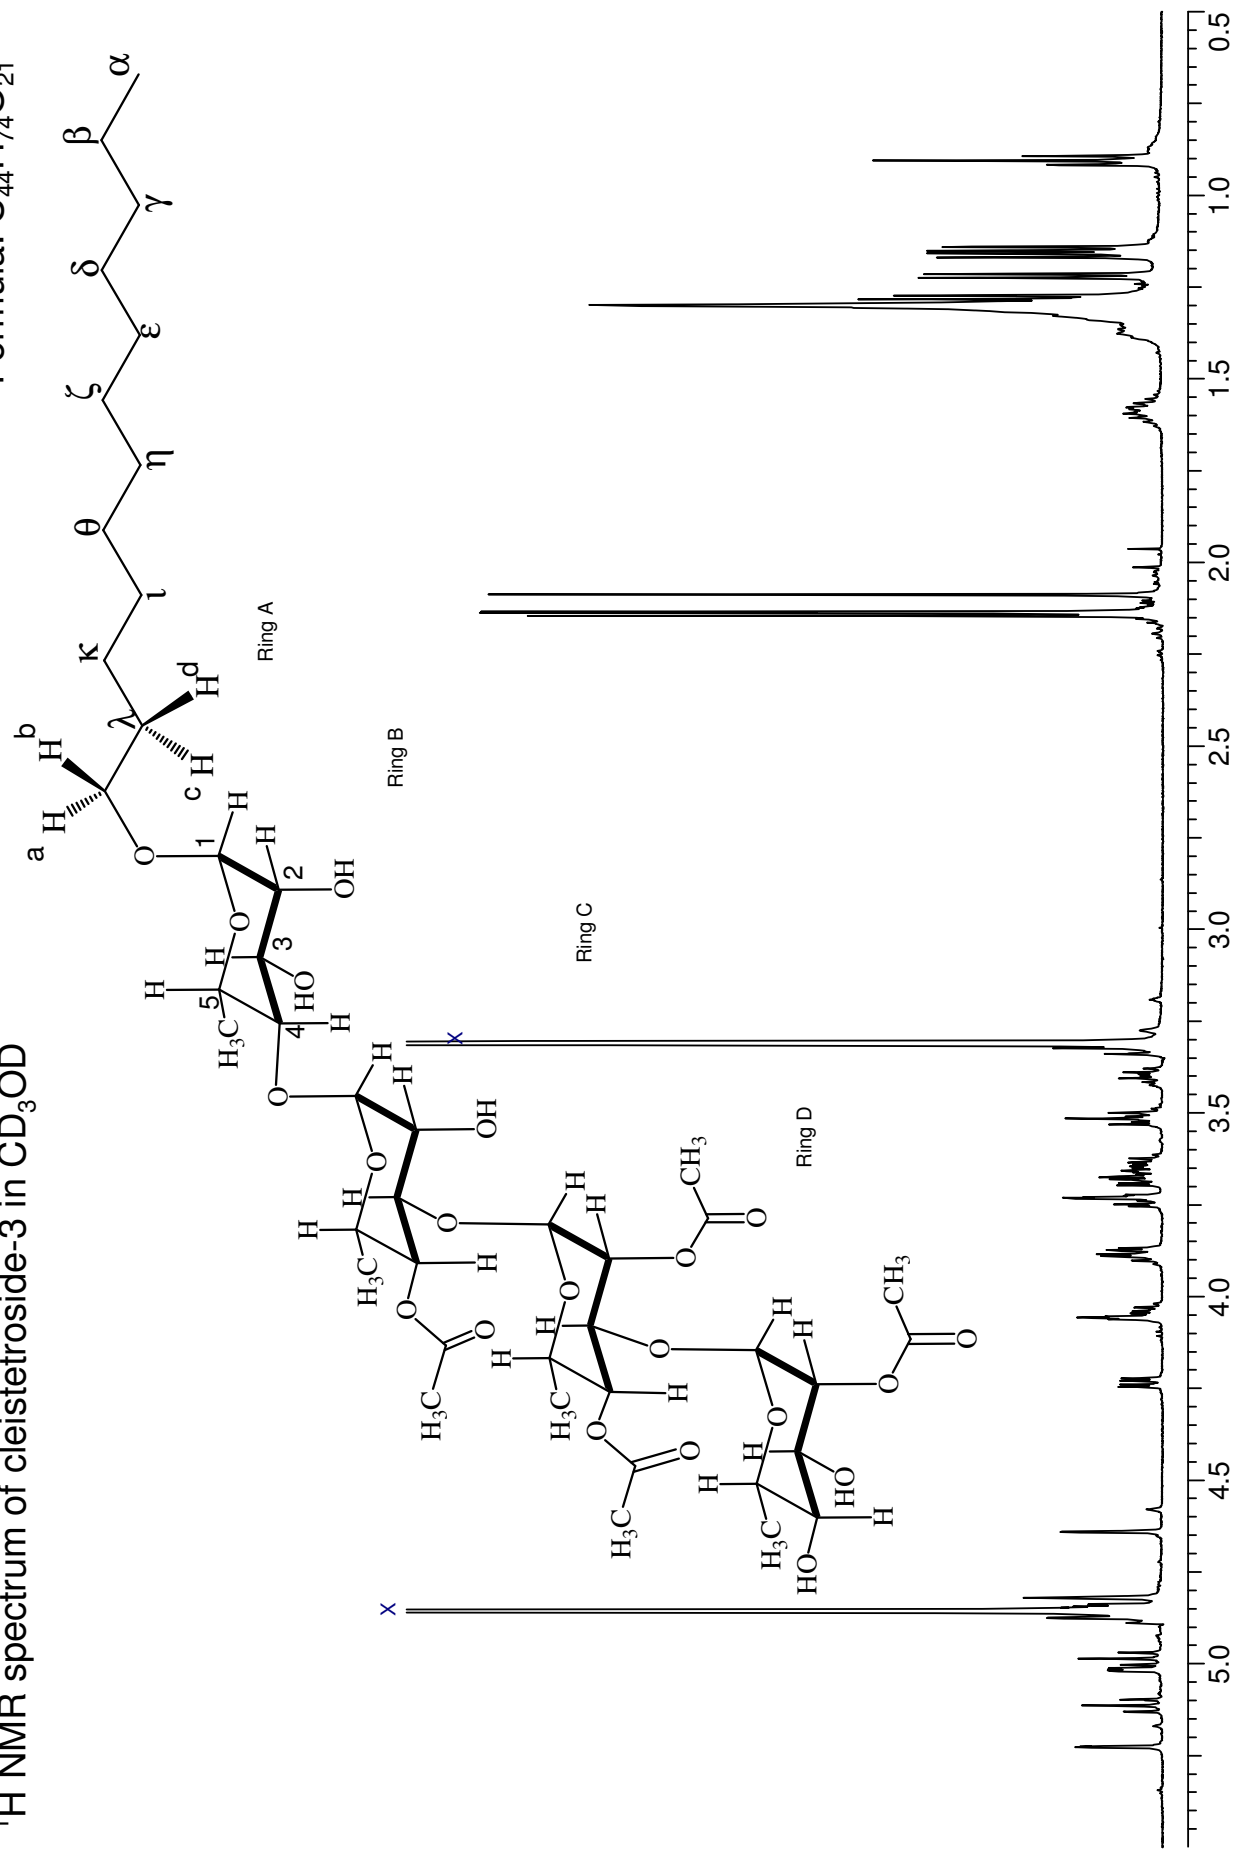

# 1D TOCSY spectra (a-e)

Spin system identification

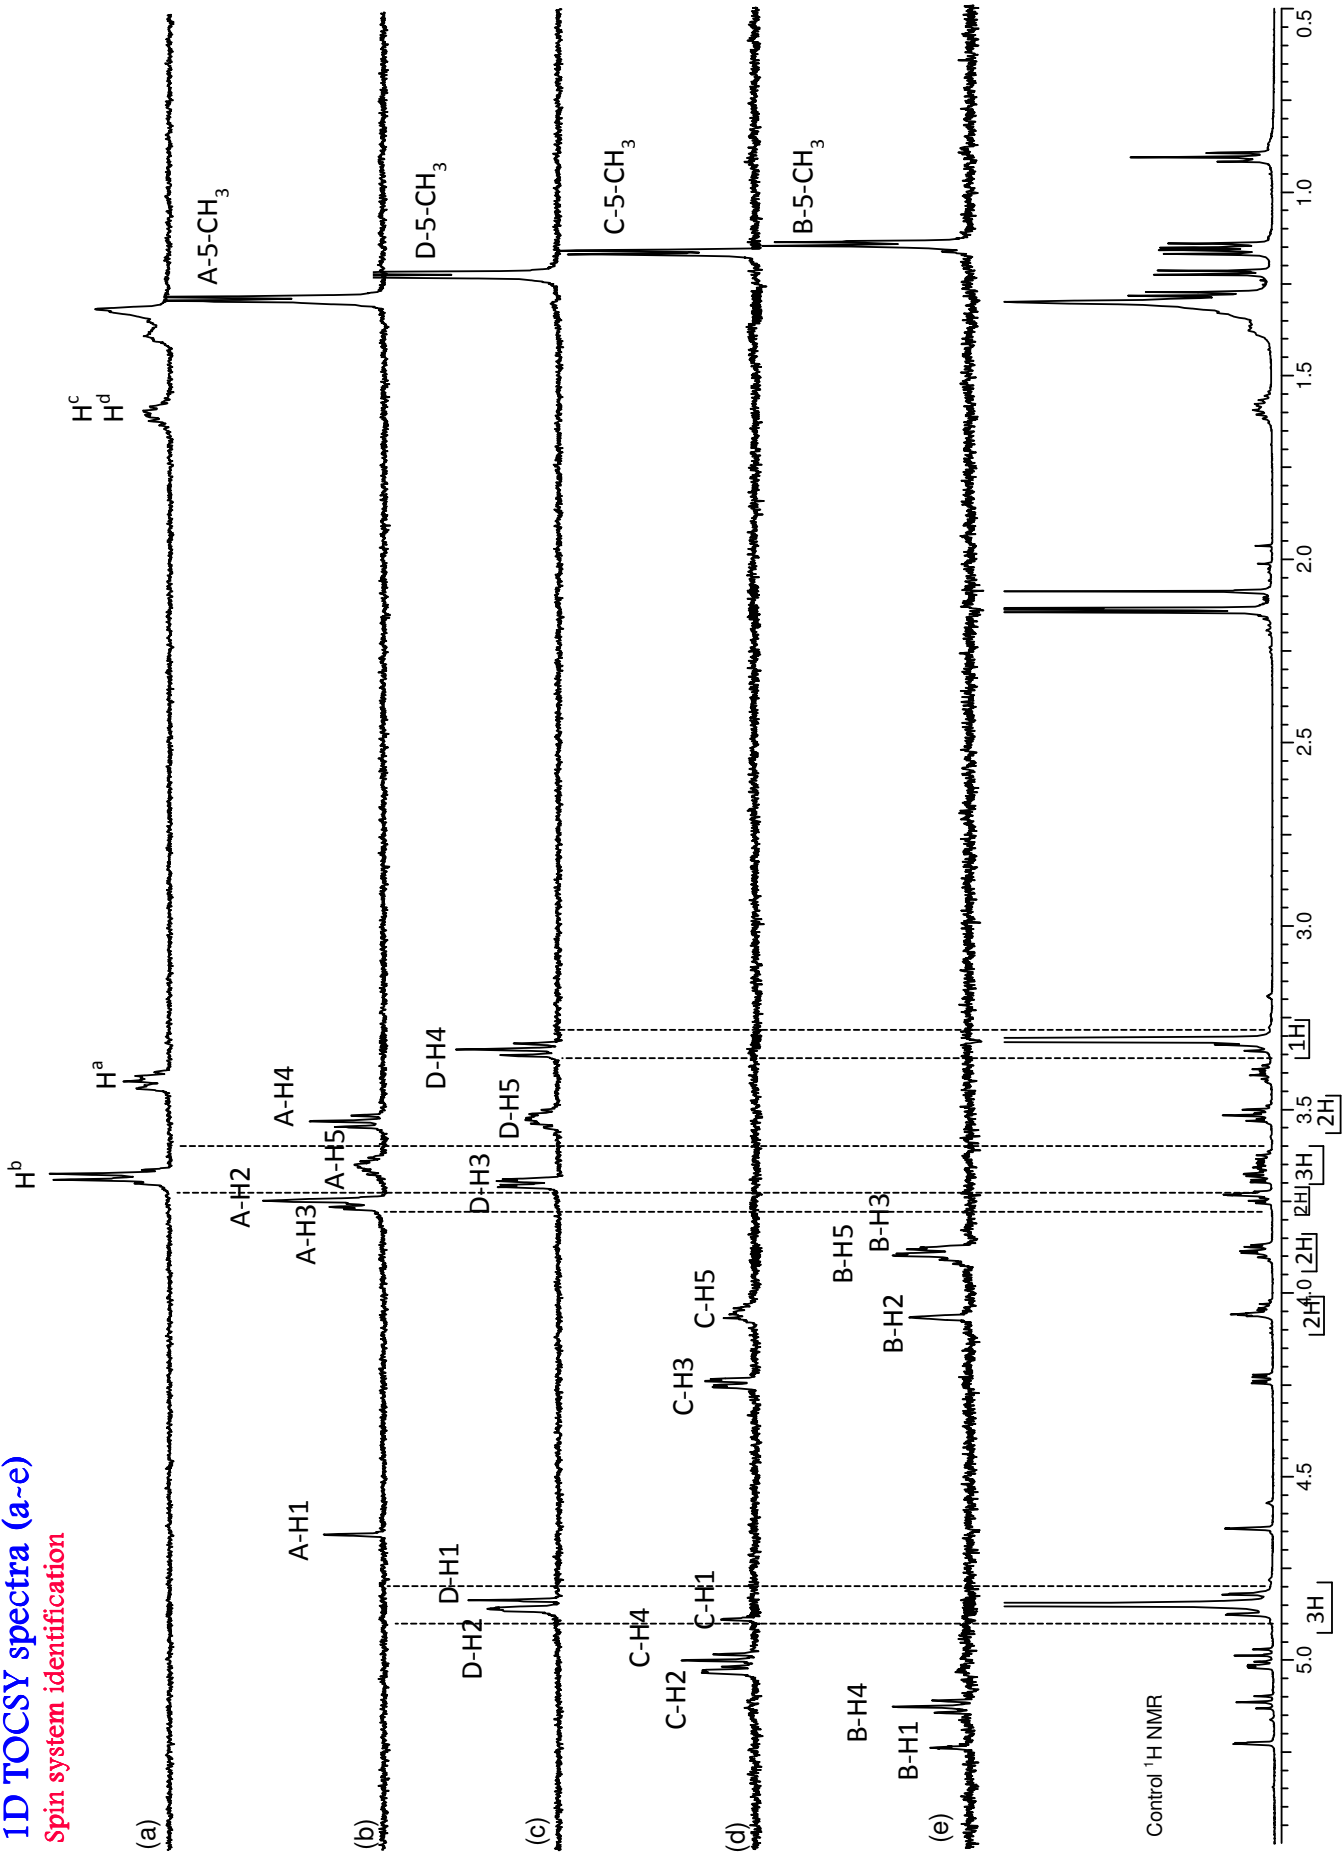

**DPFGSENOE spectra (a-e)**  
*through space correlations between two sugar units*

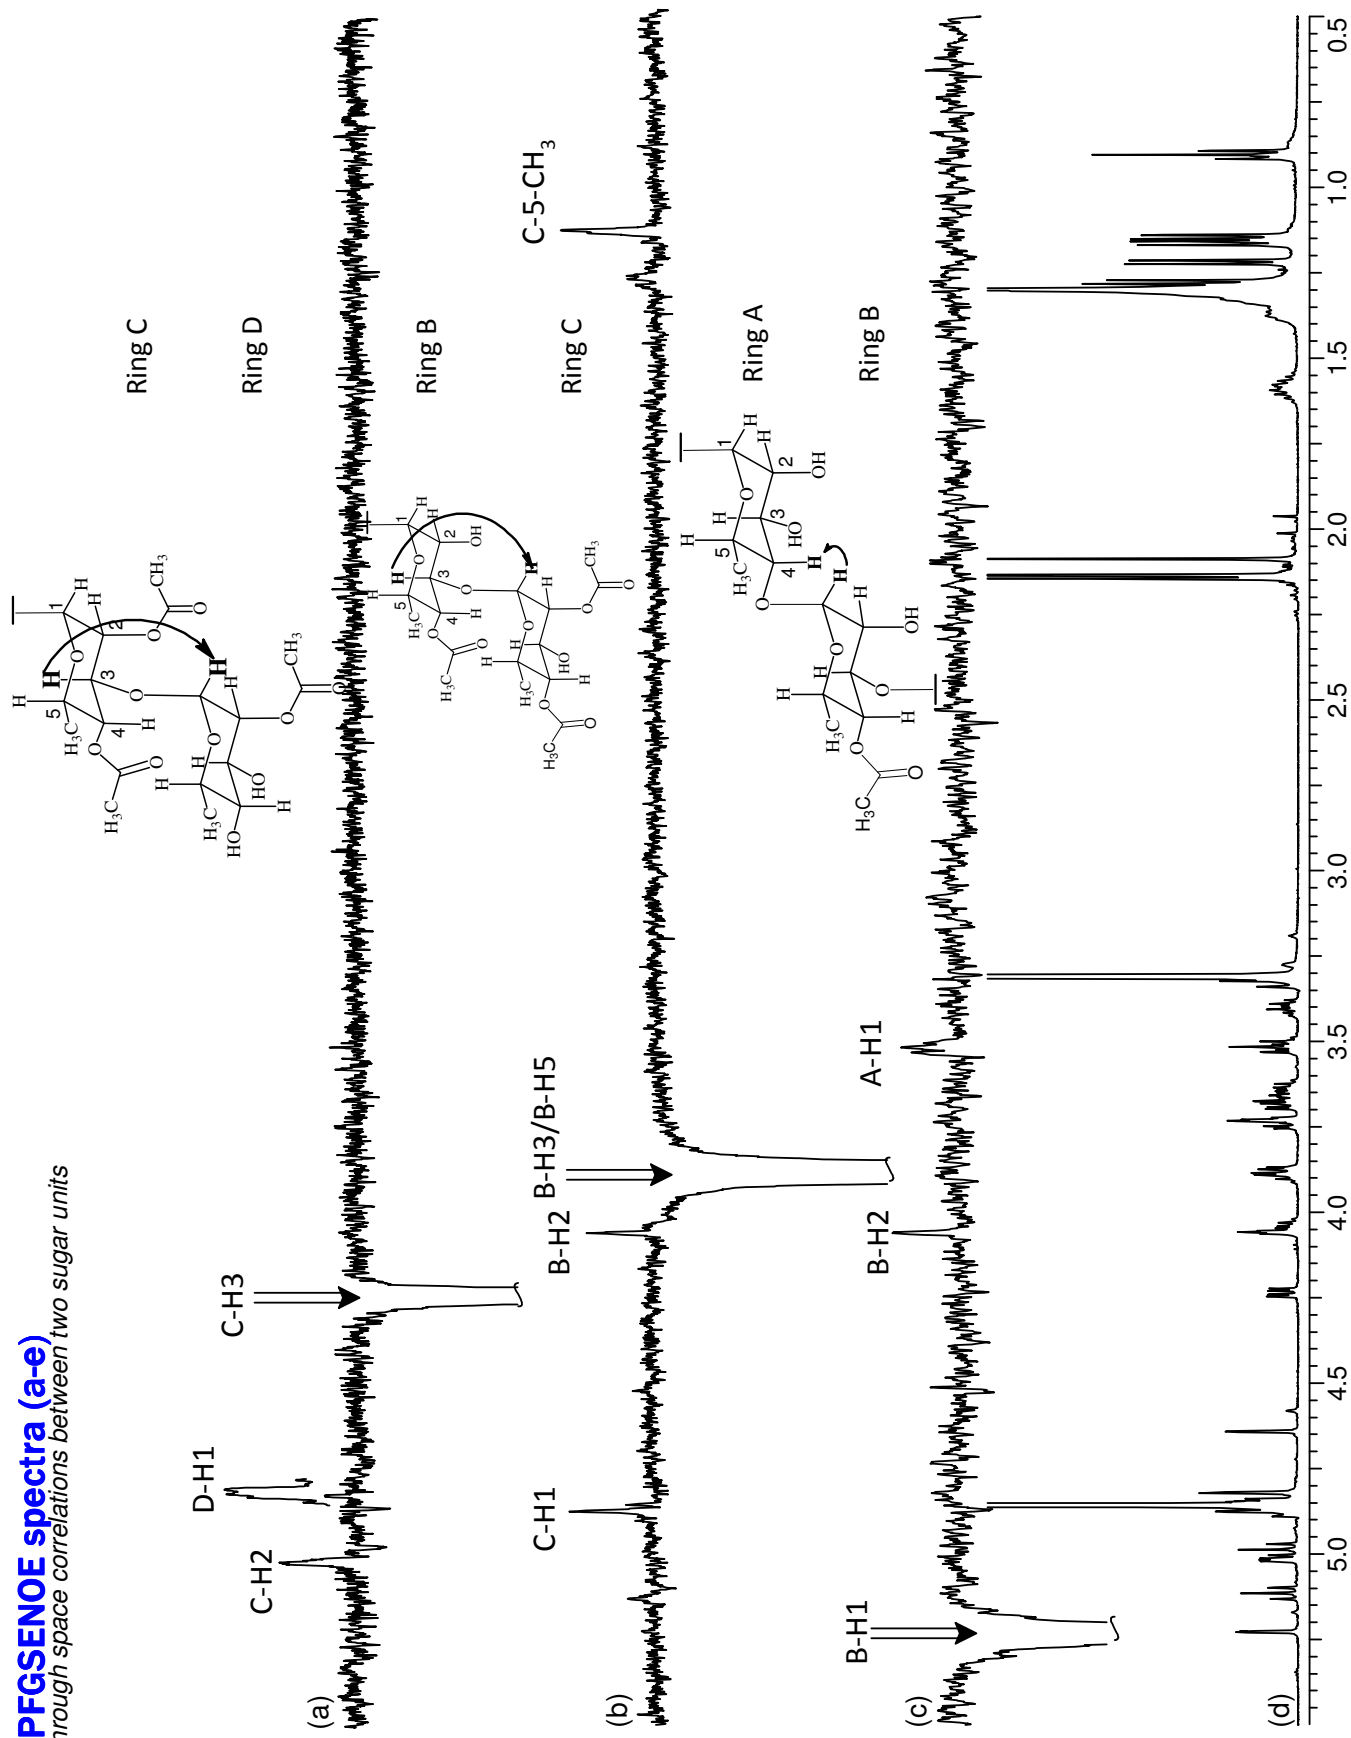

Calculated (a) and experimental (b)  $^1\text{H}$  NMR spectrum

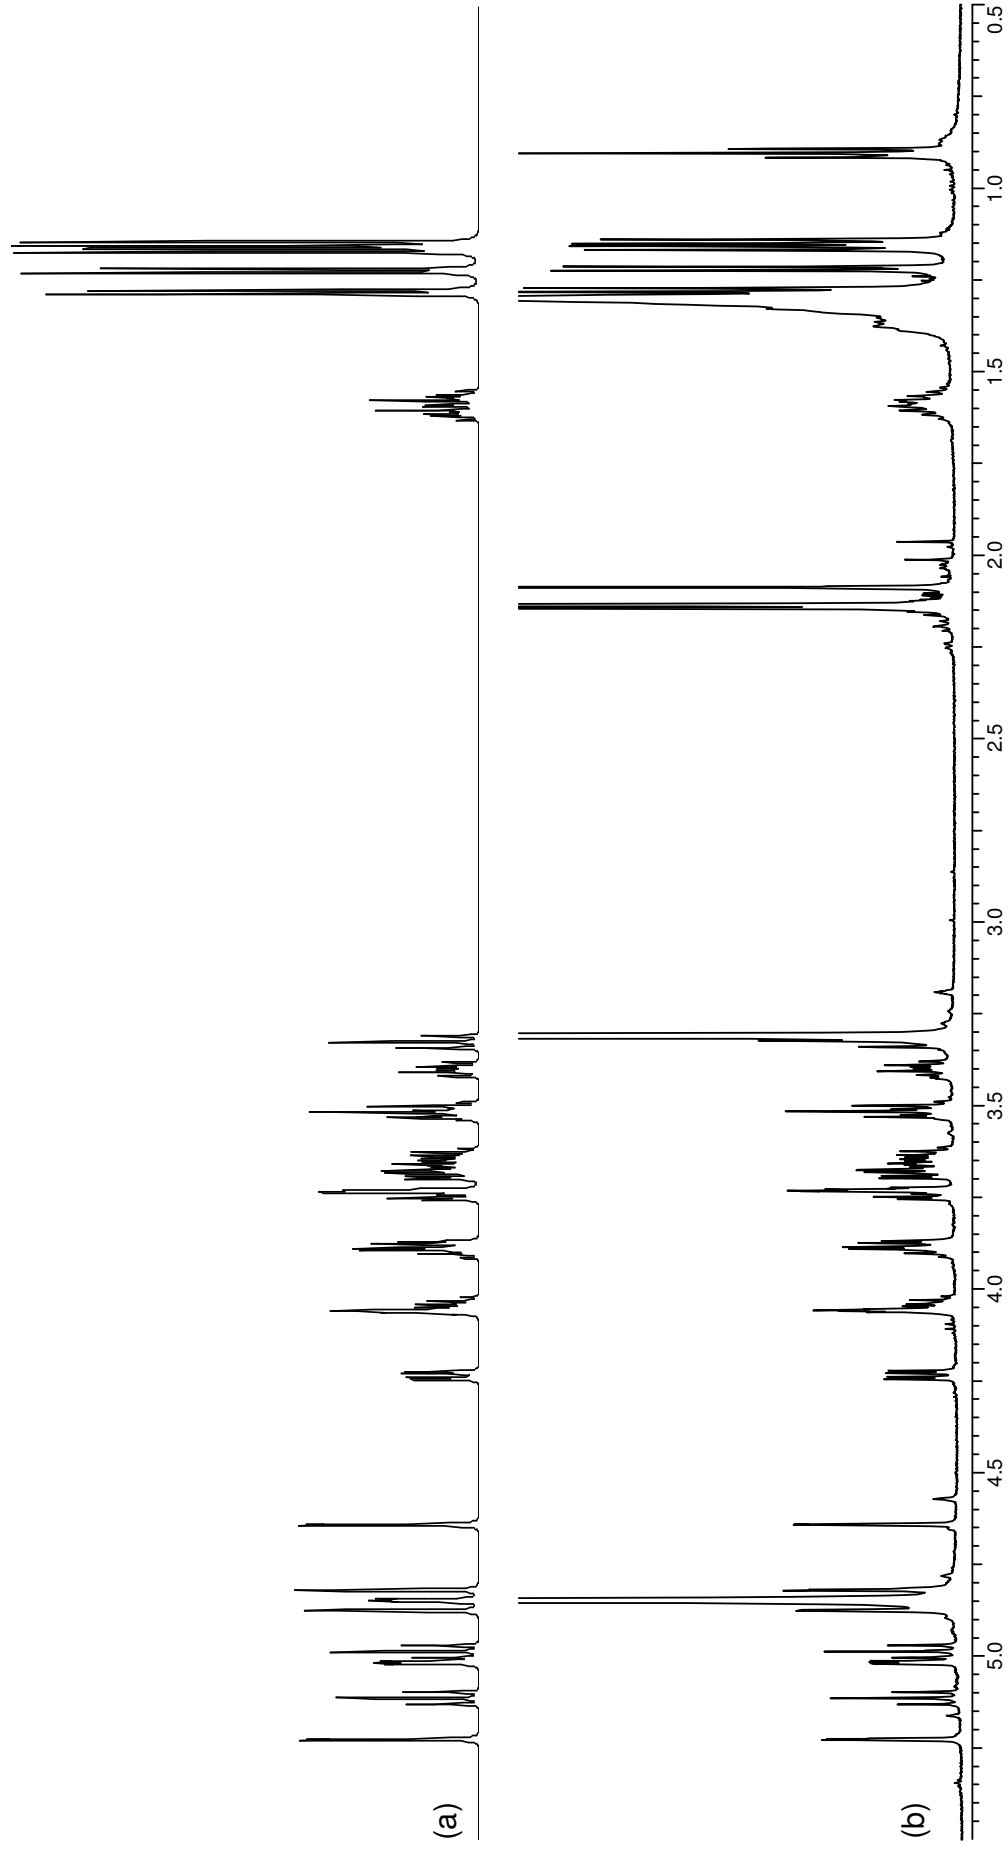

Expanded portion of calculated (a) and experimental (b)  $^1\text{H}$  NMR spectrum

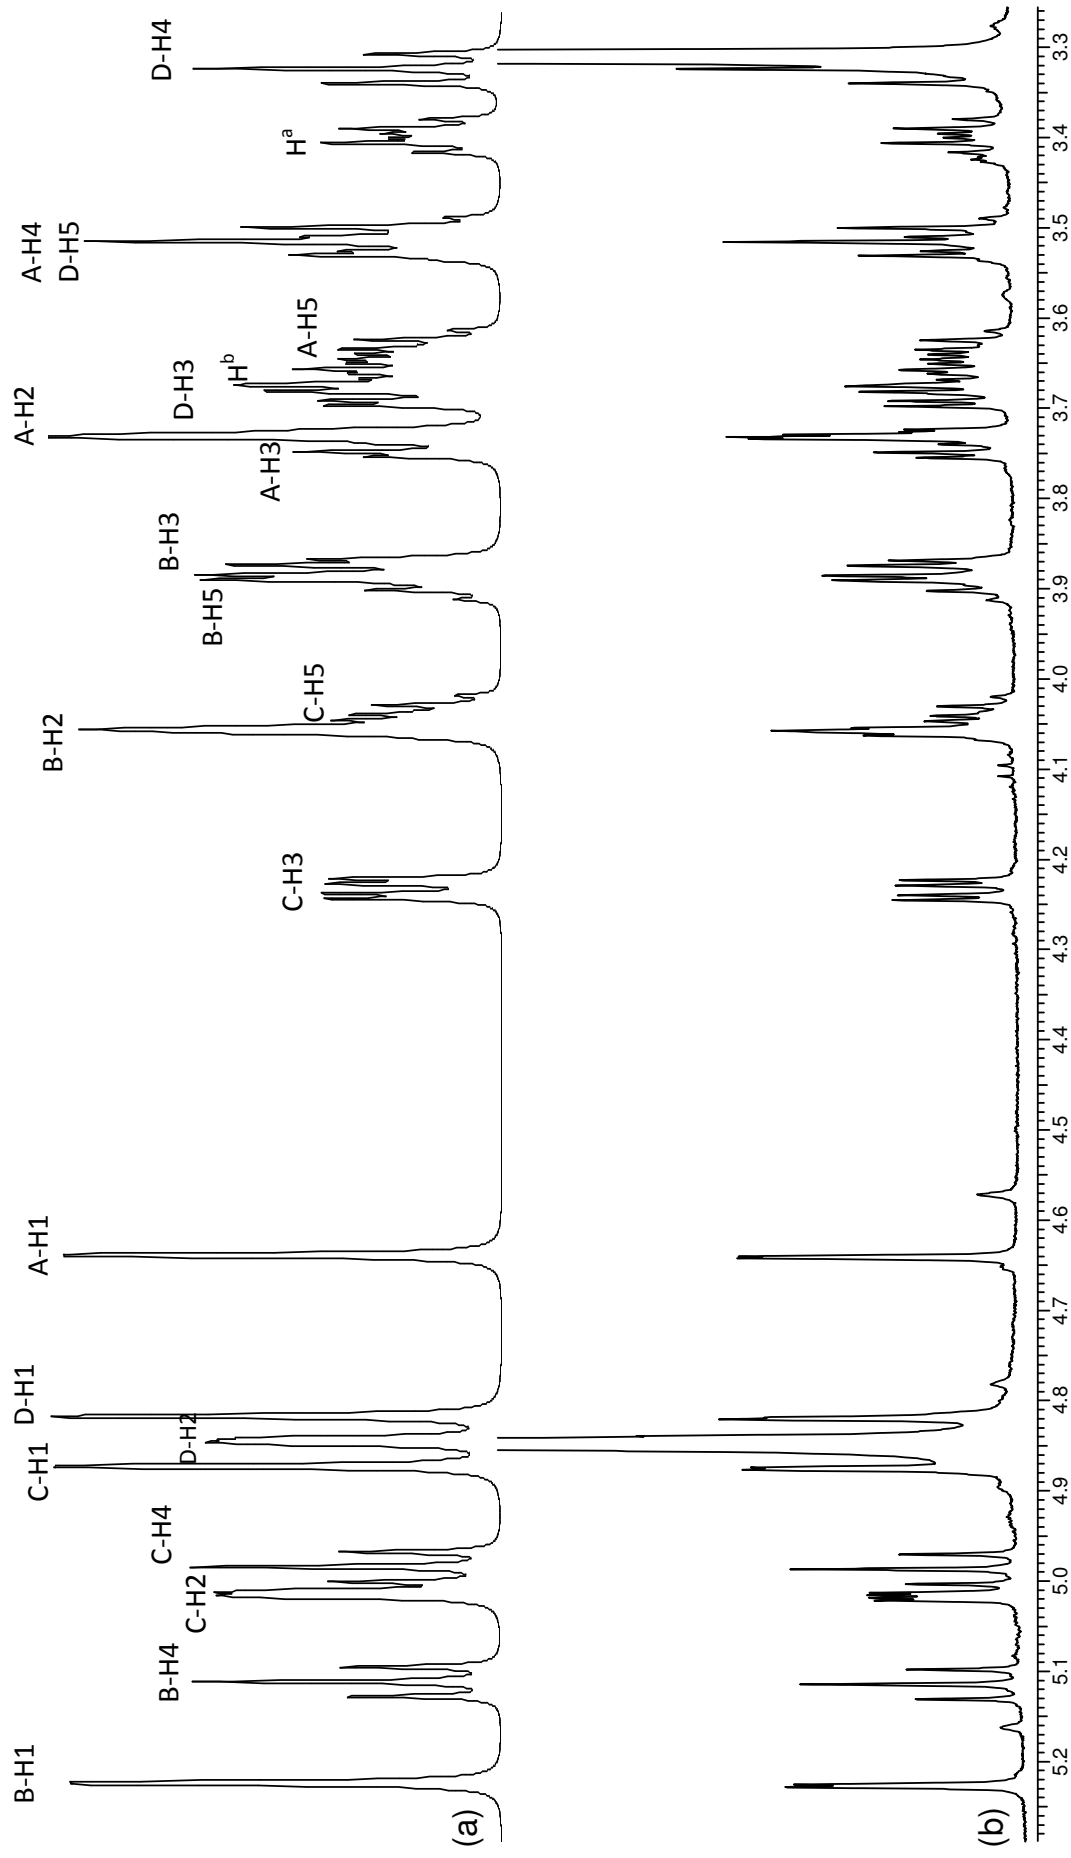

Expanded portion of calculated (a) and experimental (b)  $^1\text{H}$  NMR spectrum

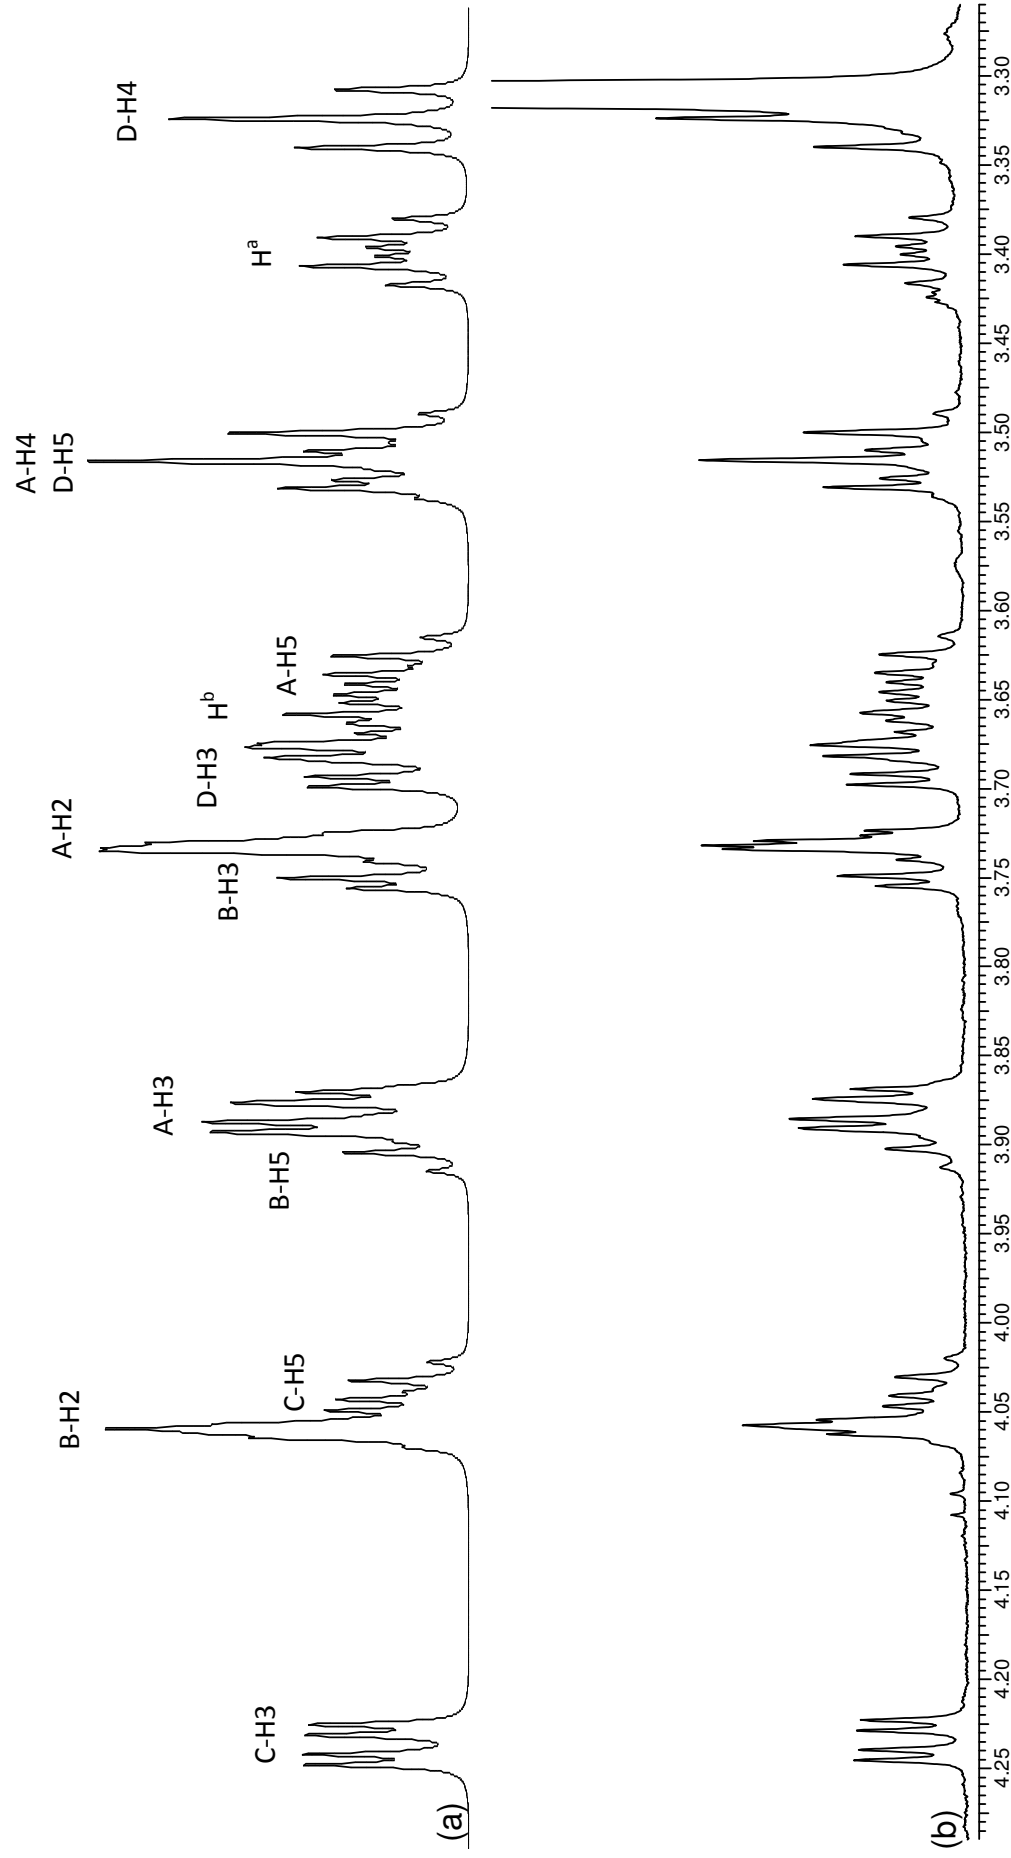



Expanded portion of calculated (a) and experimental (b)  $^1\text{H}$  NMR spectrum

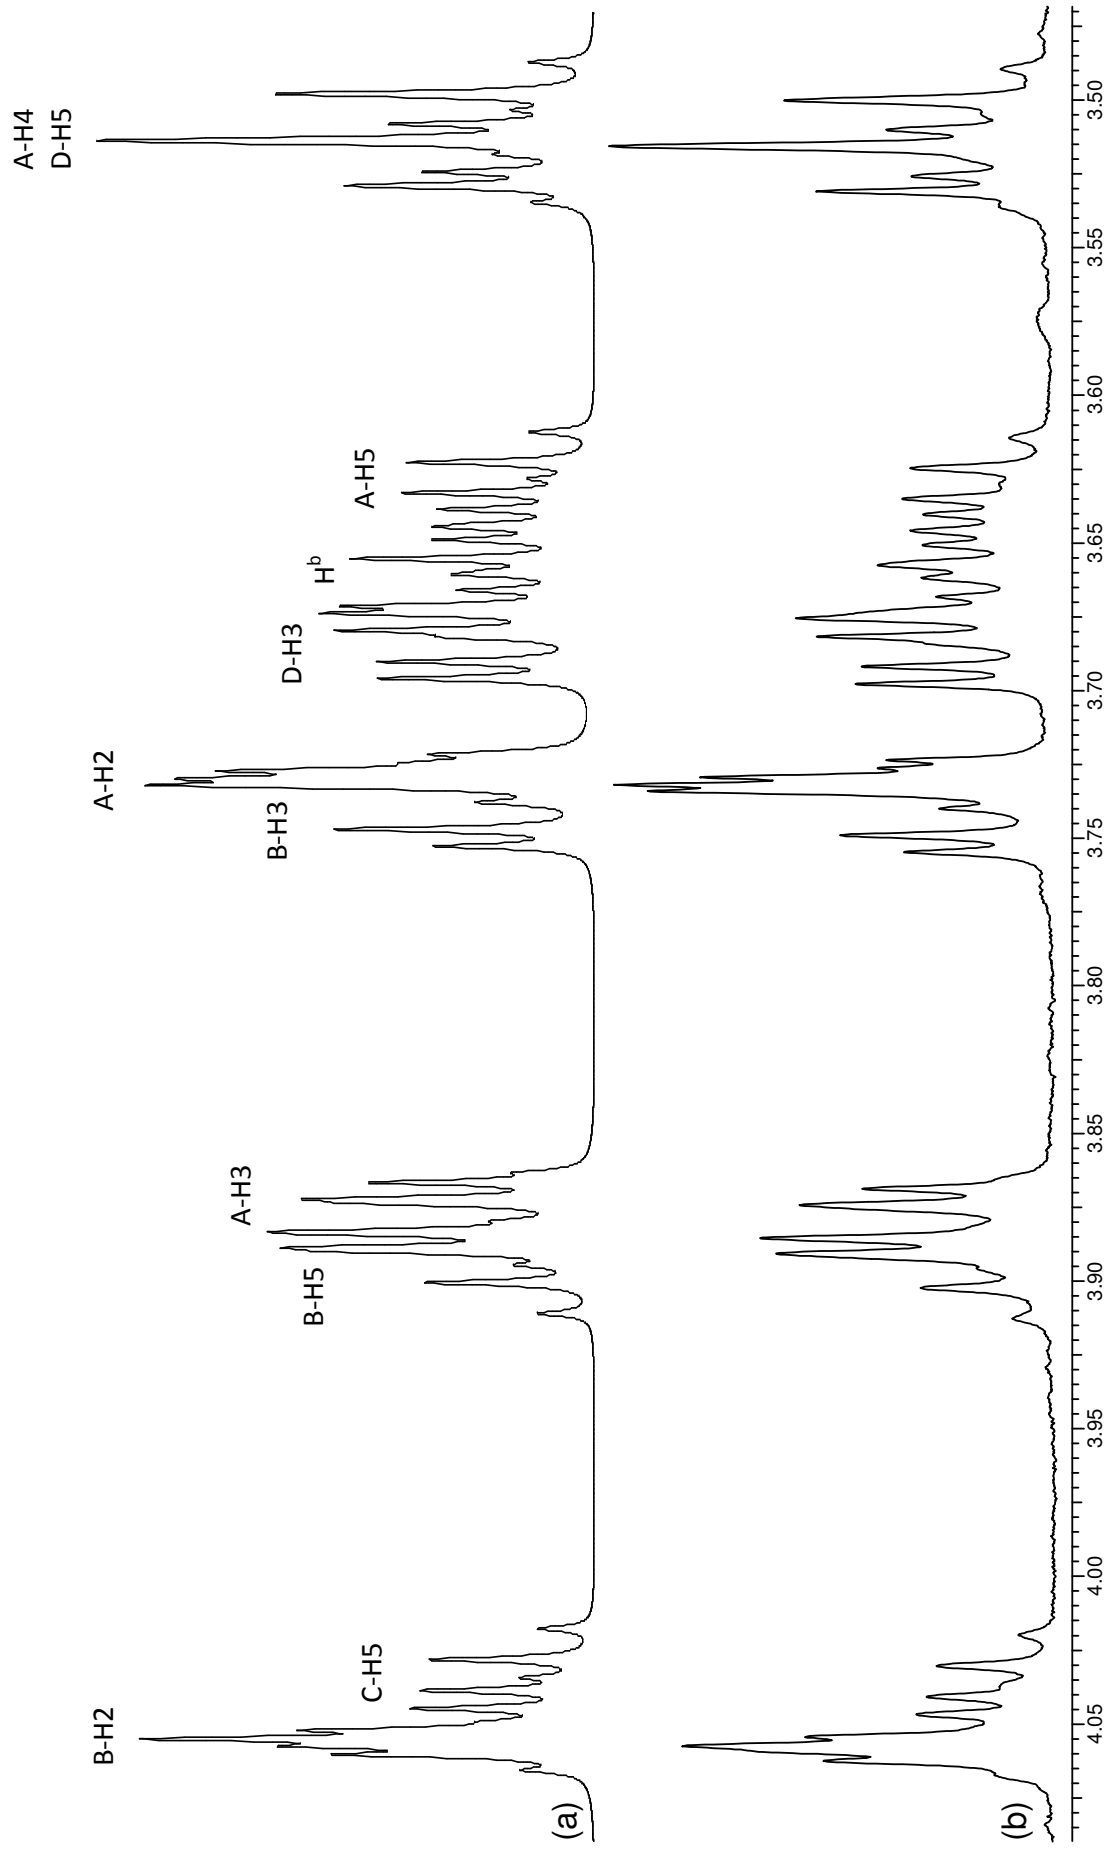

Expanded portion of calculated (a) and experimental (b)  $^1\text{H}$  NMR spectrum

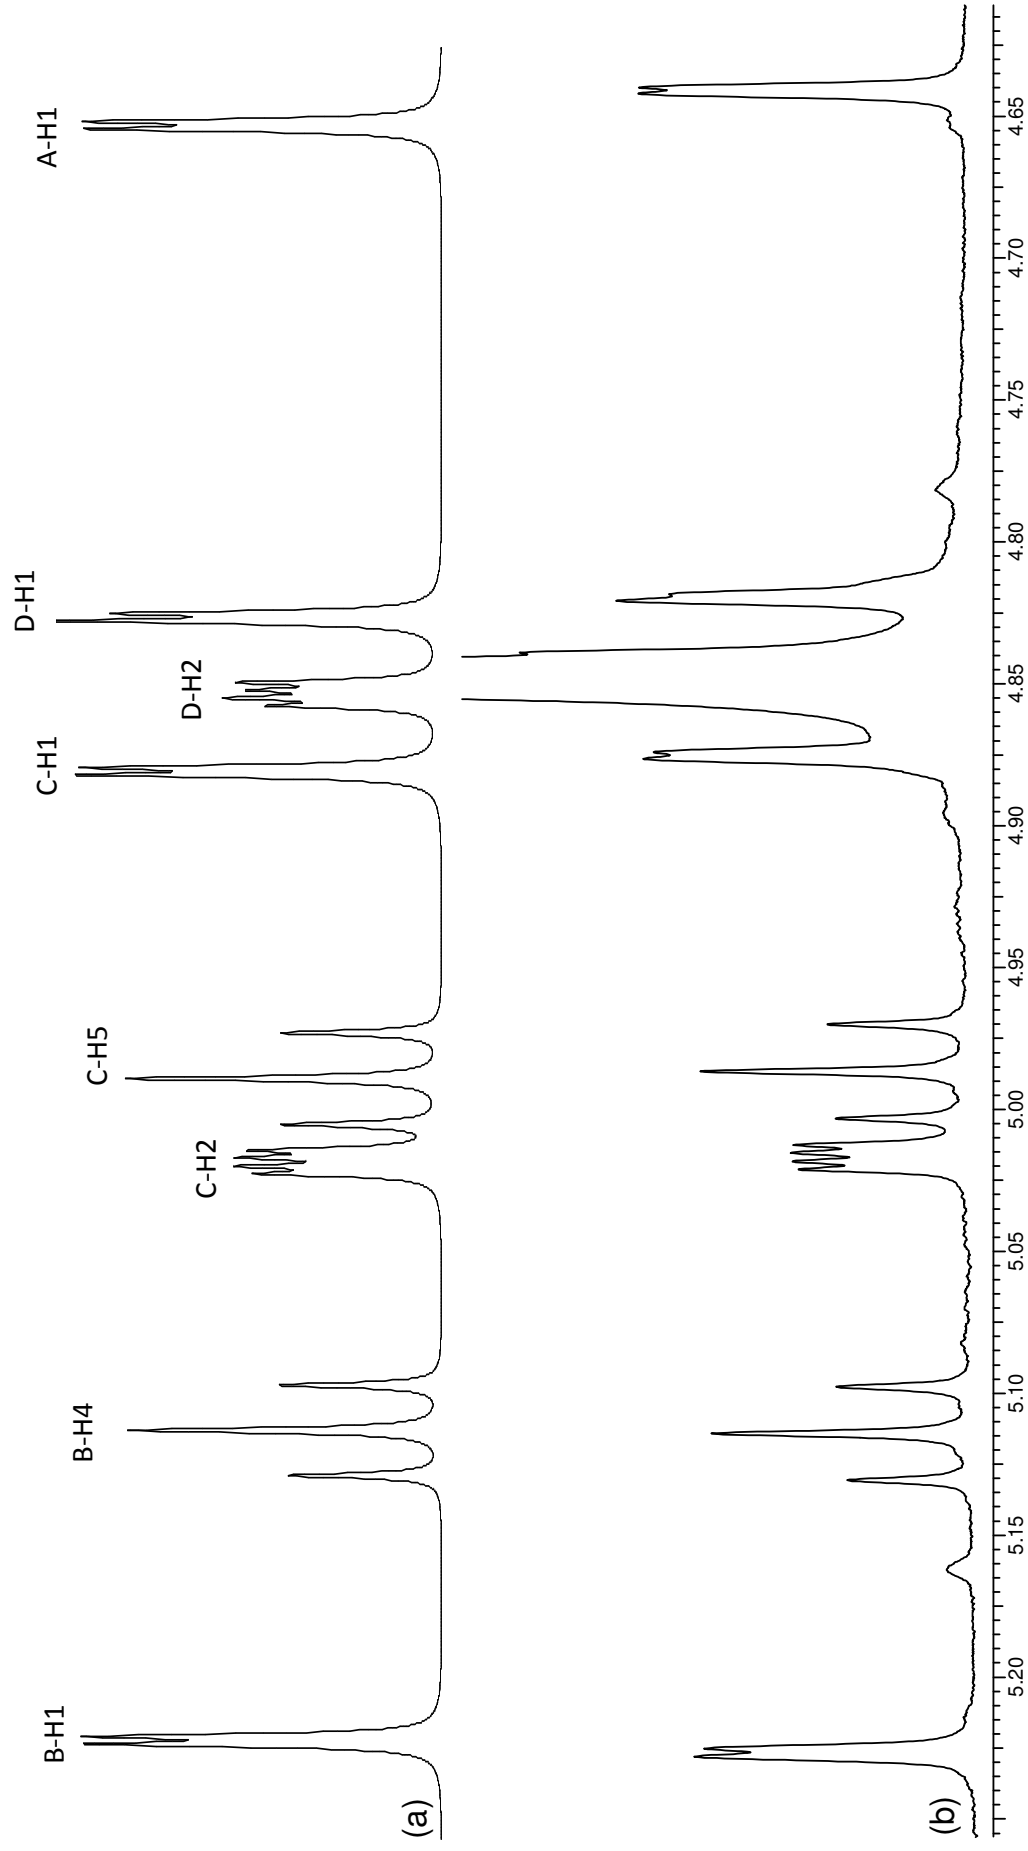

# gCOSY spectrum

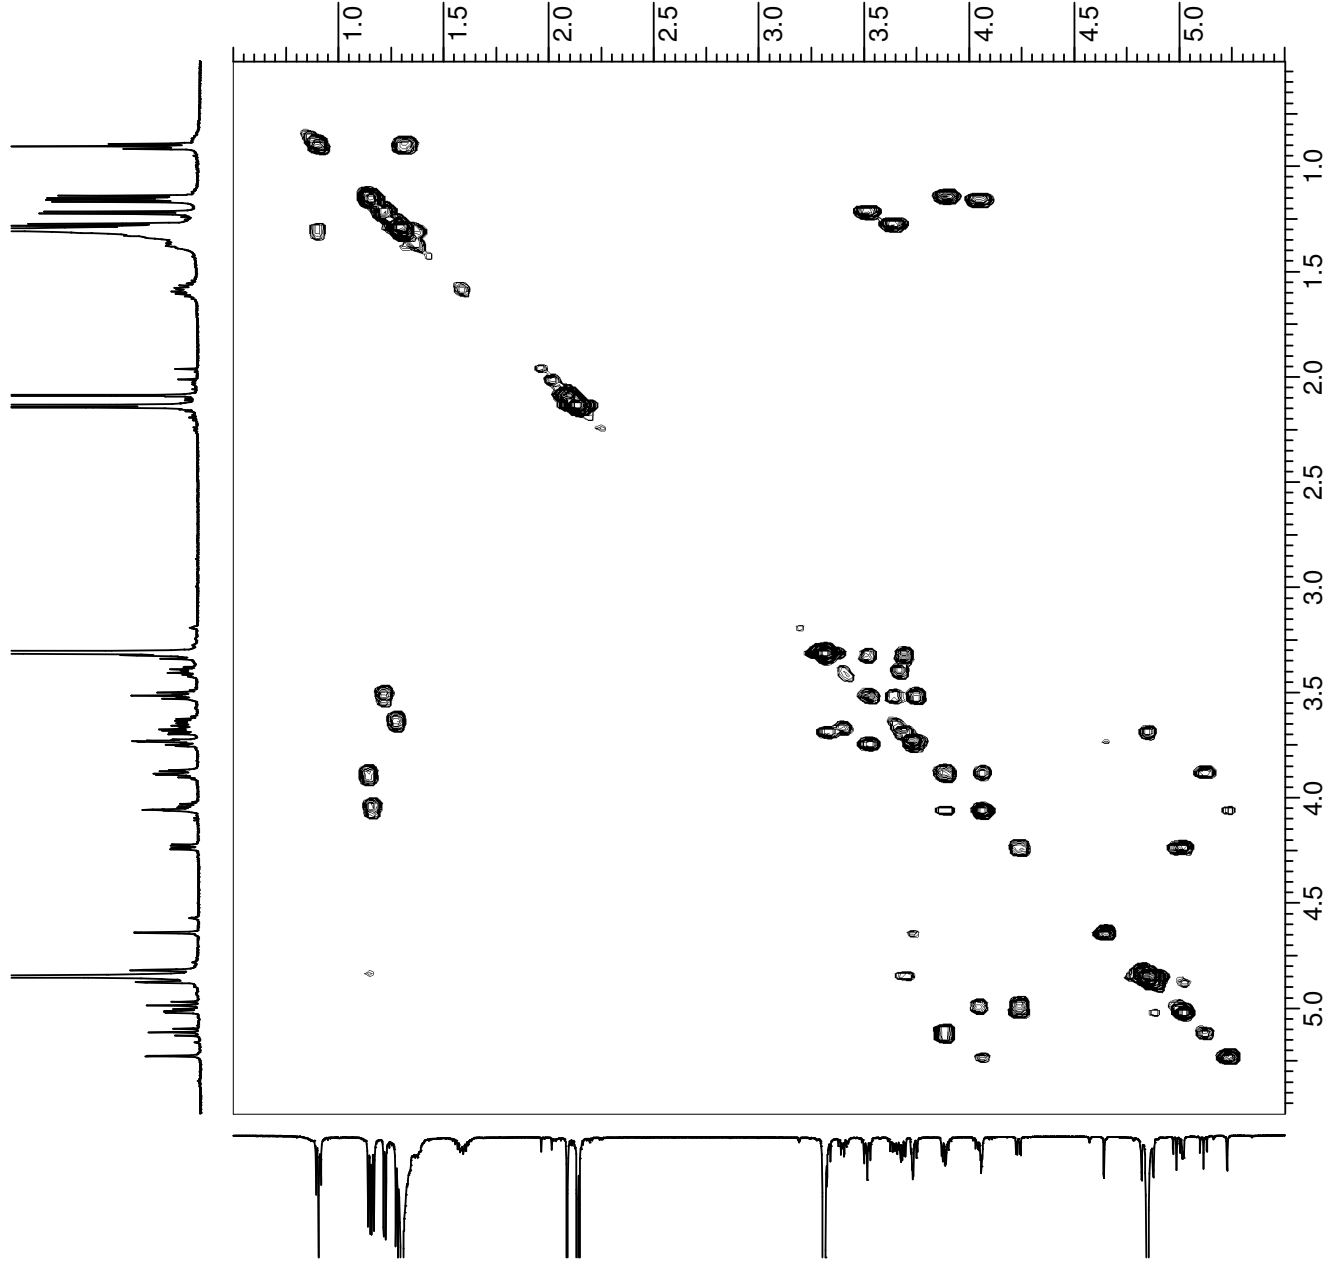

Expanded portion of the  
gCOSY spectrum

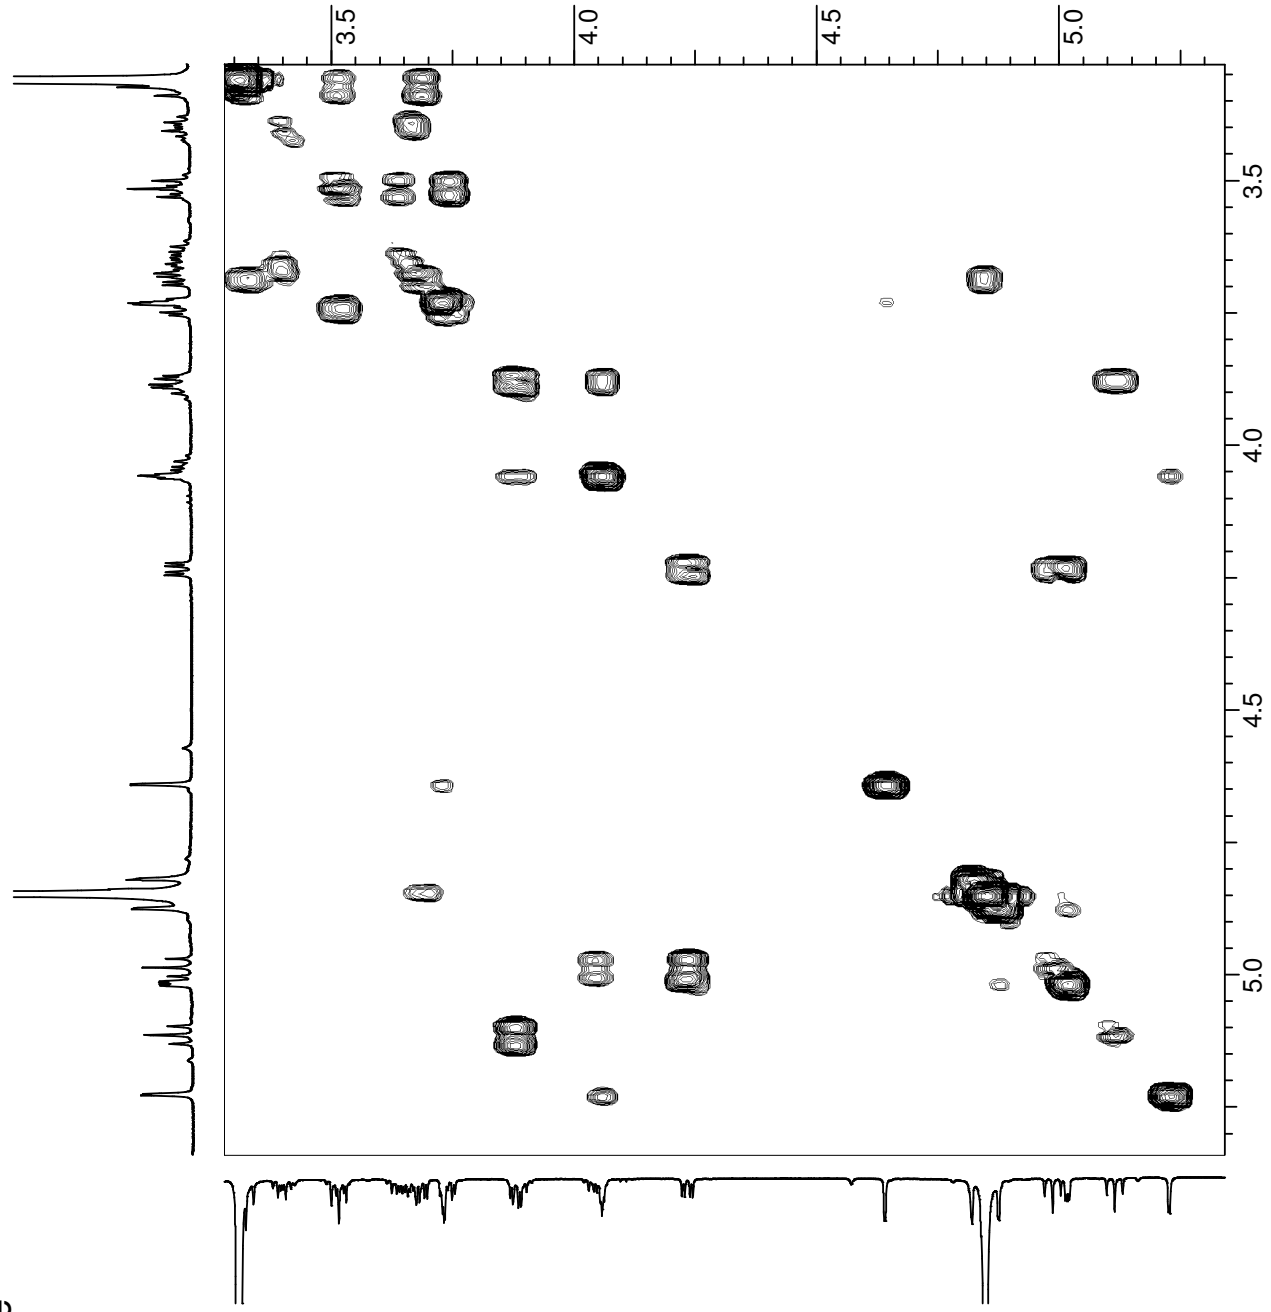

Expanded portion of the  
gCOSY spectrum

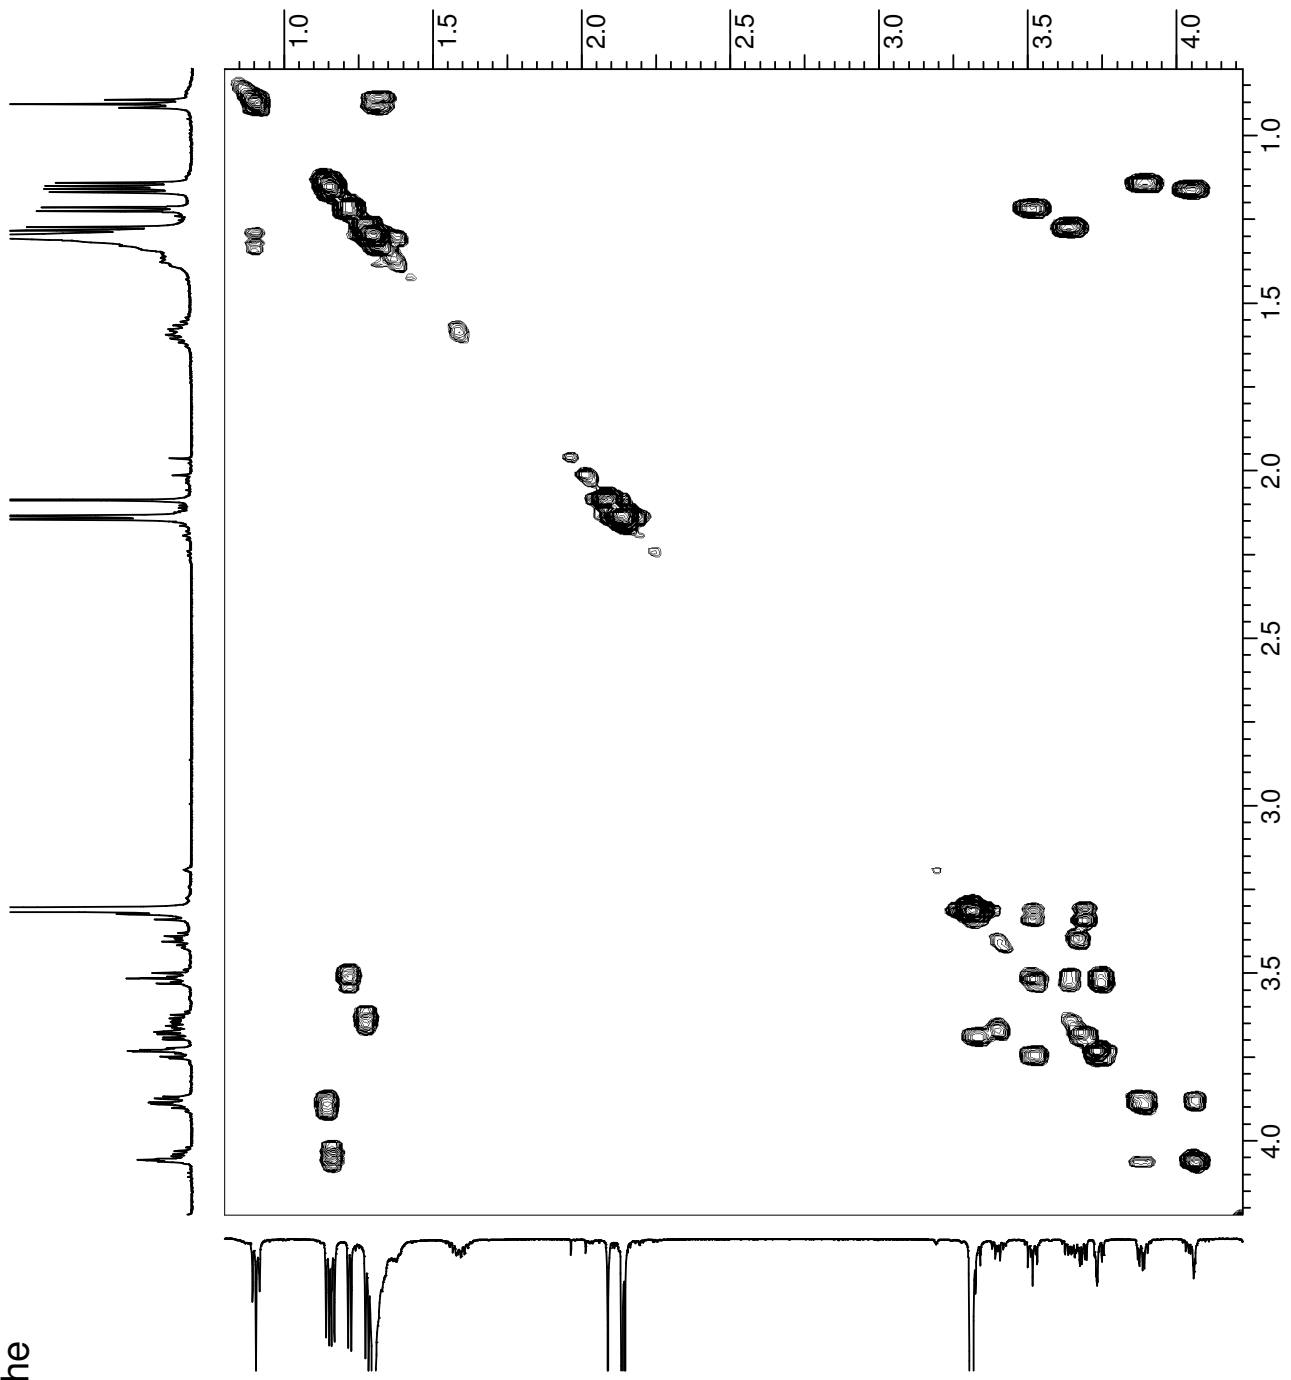

$^{13}\text{C}$  NMR spectrum of cleistretroside-3 in  $\text{CD}_3\text{OD}$

Formula:  $\text{C}_{44}\text{H}_{74}\text{O}_{21}$

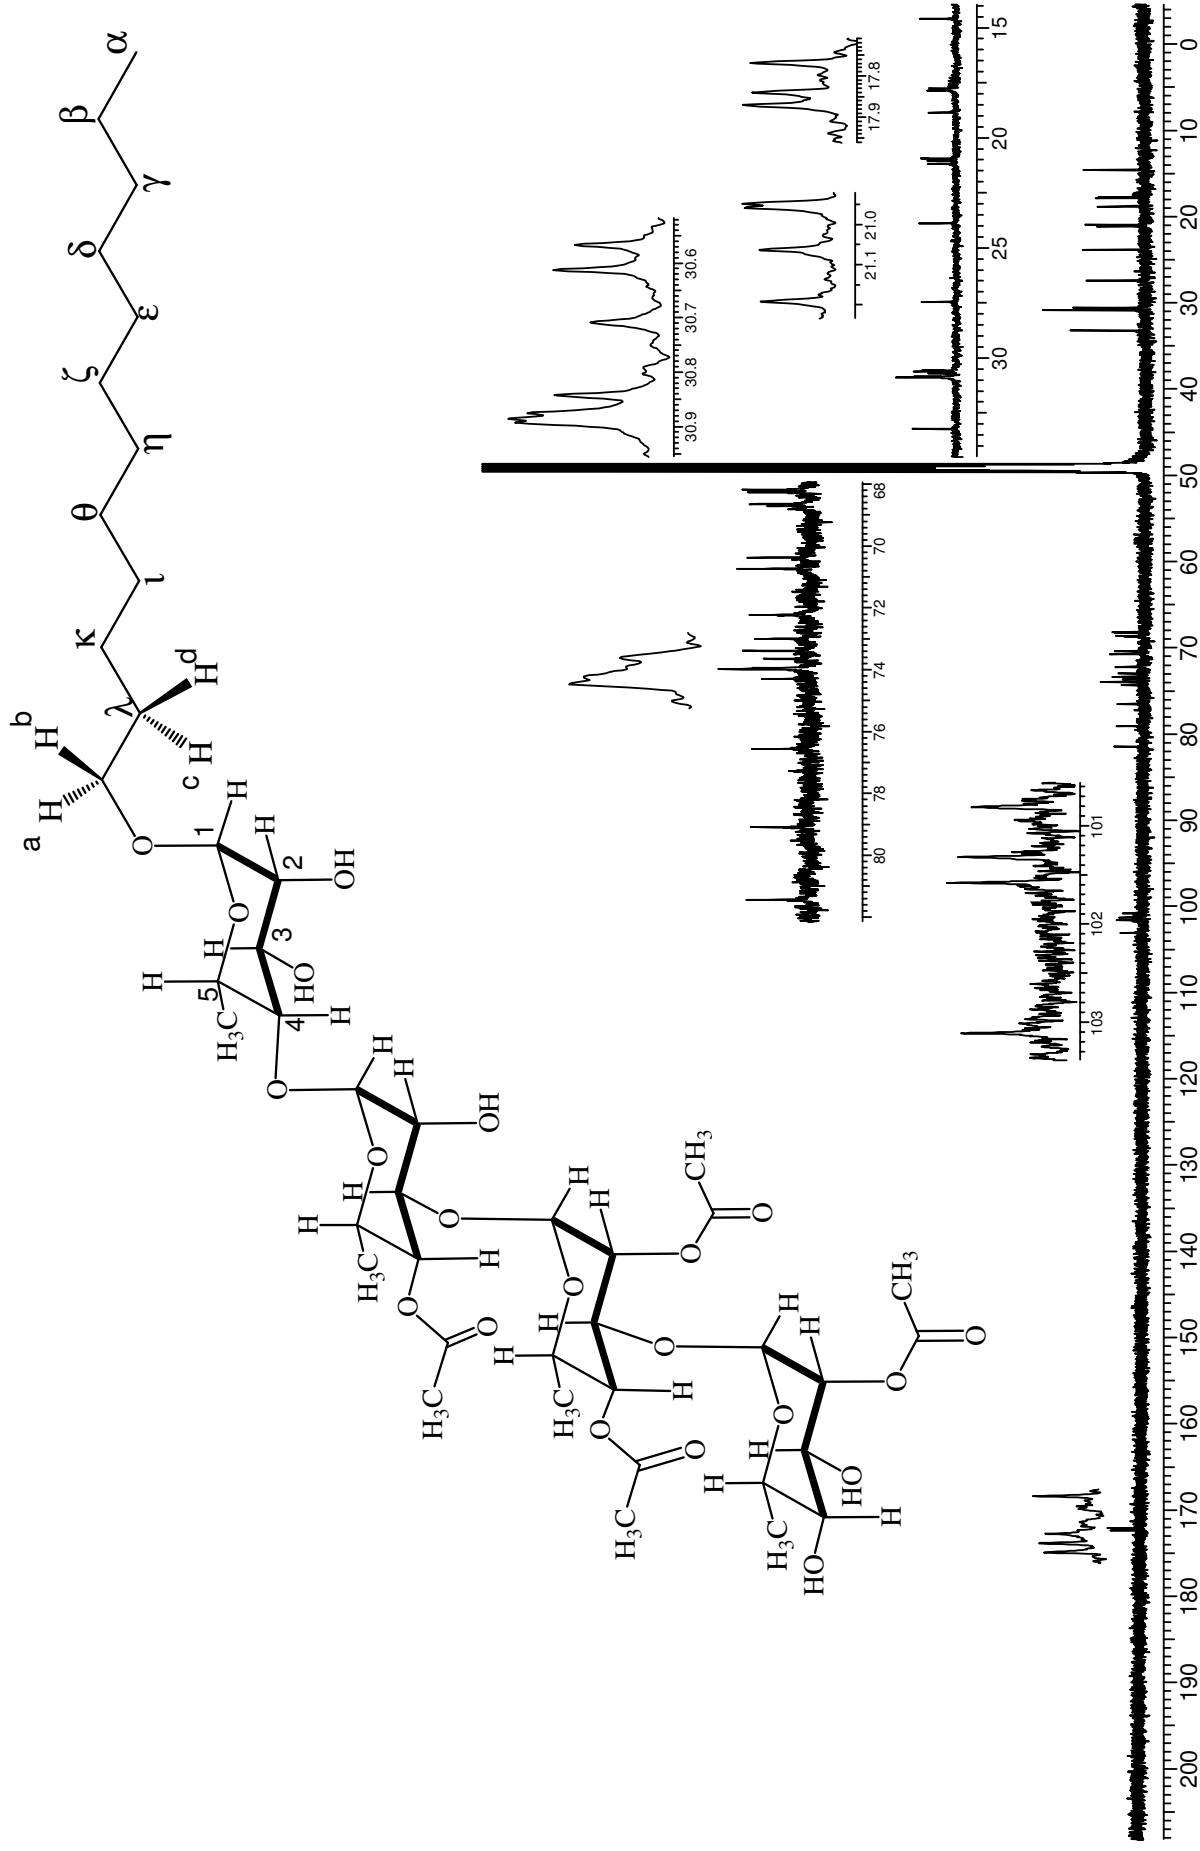

# One-bond gHMQC correlations

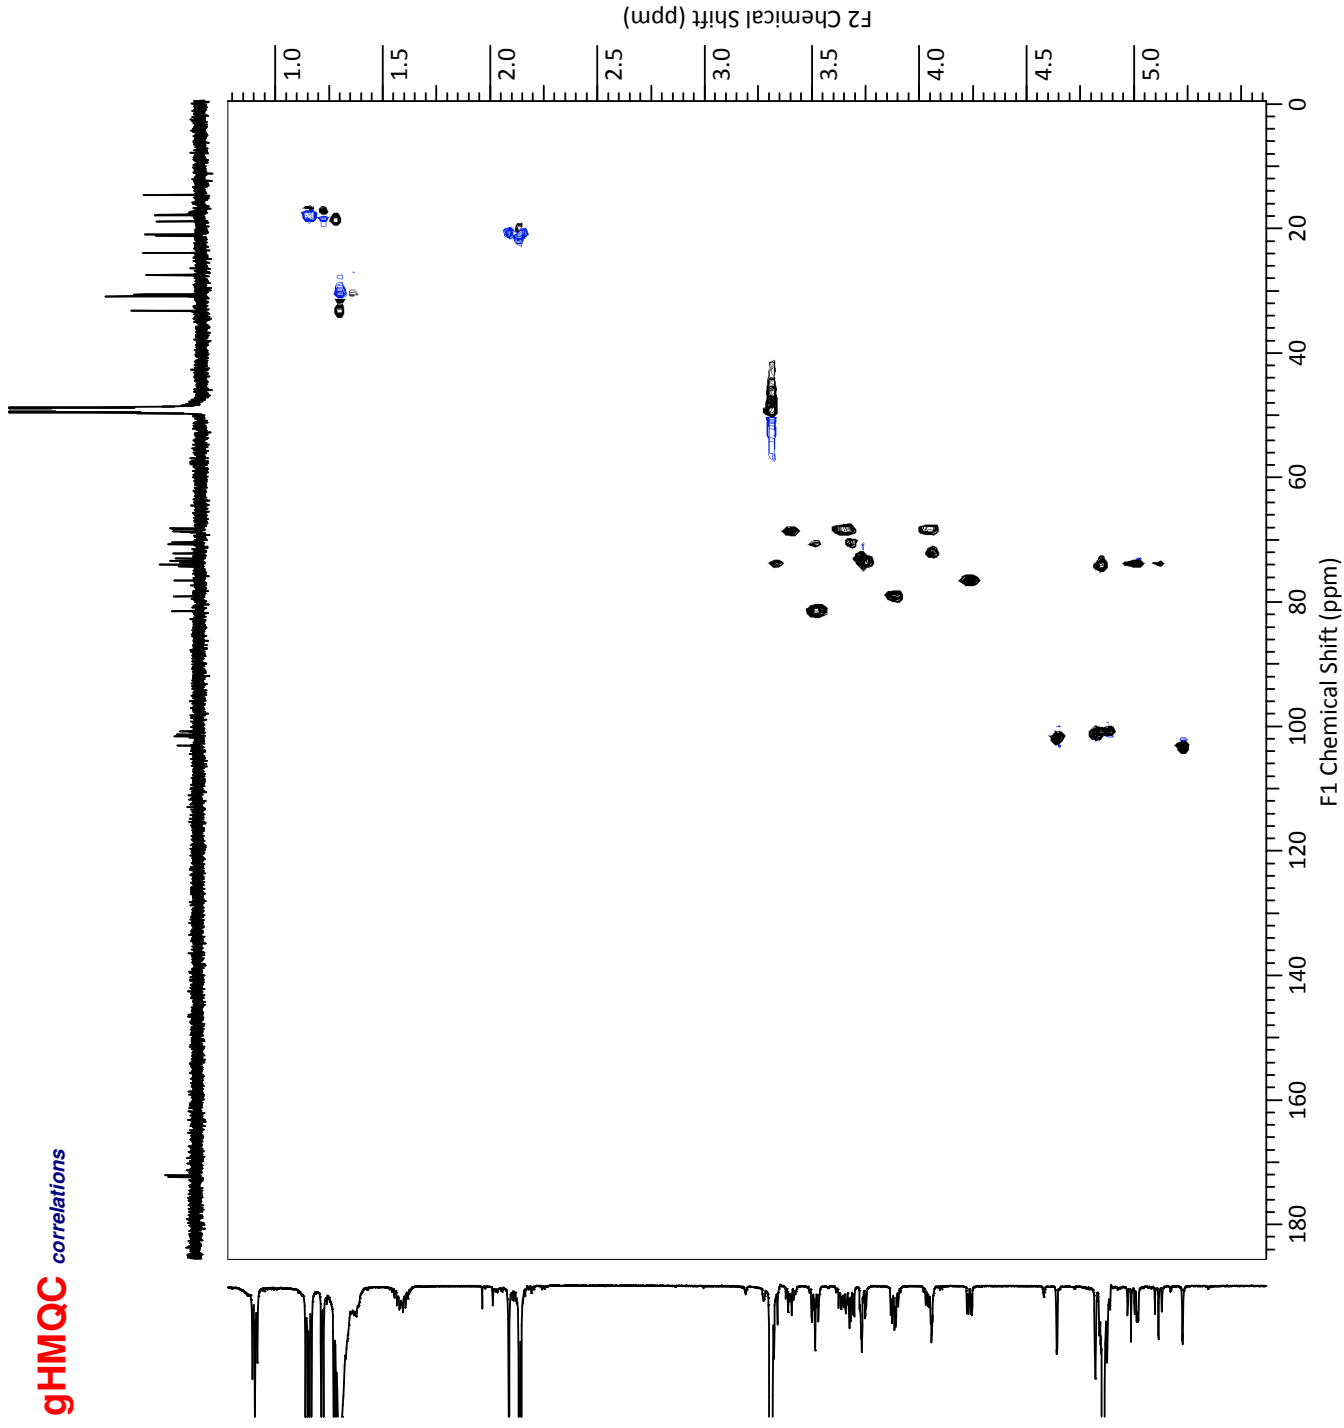

# Expansion of the contour plot of the gHMQC spectrum: One-bond gHMQC correlations

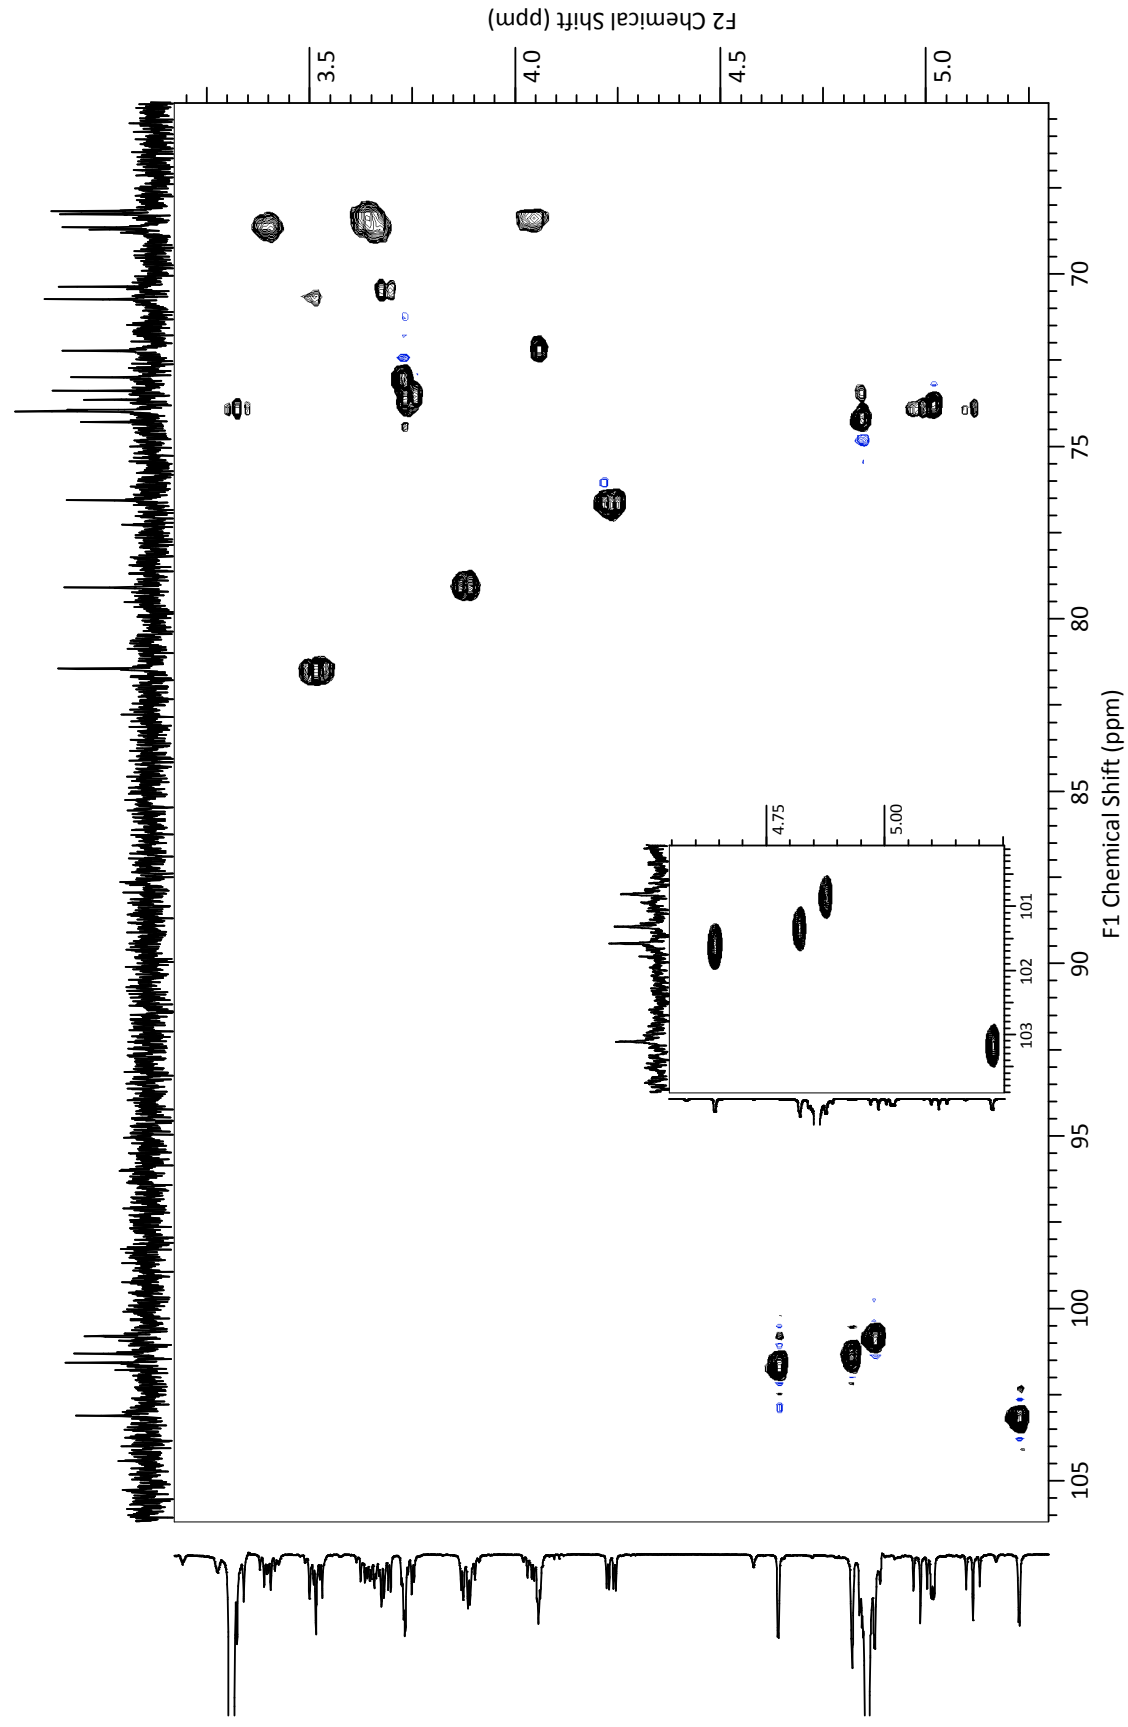



**Long-range gHMBC correlations**

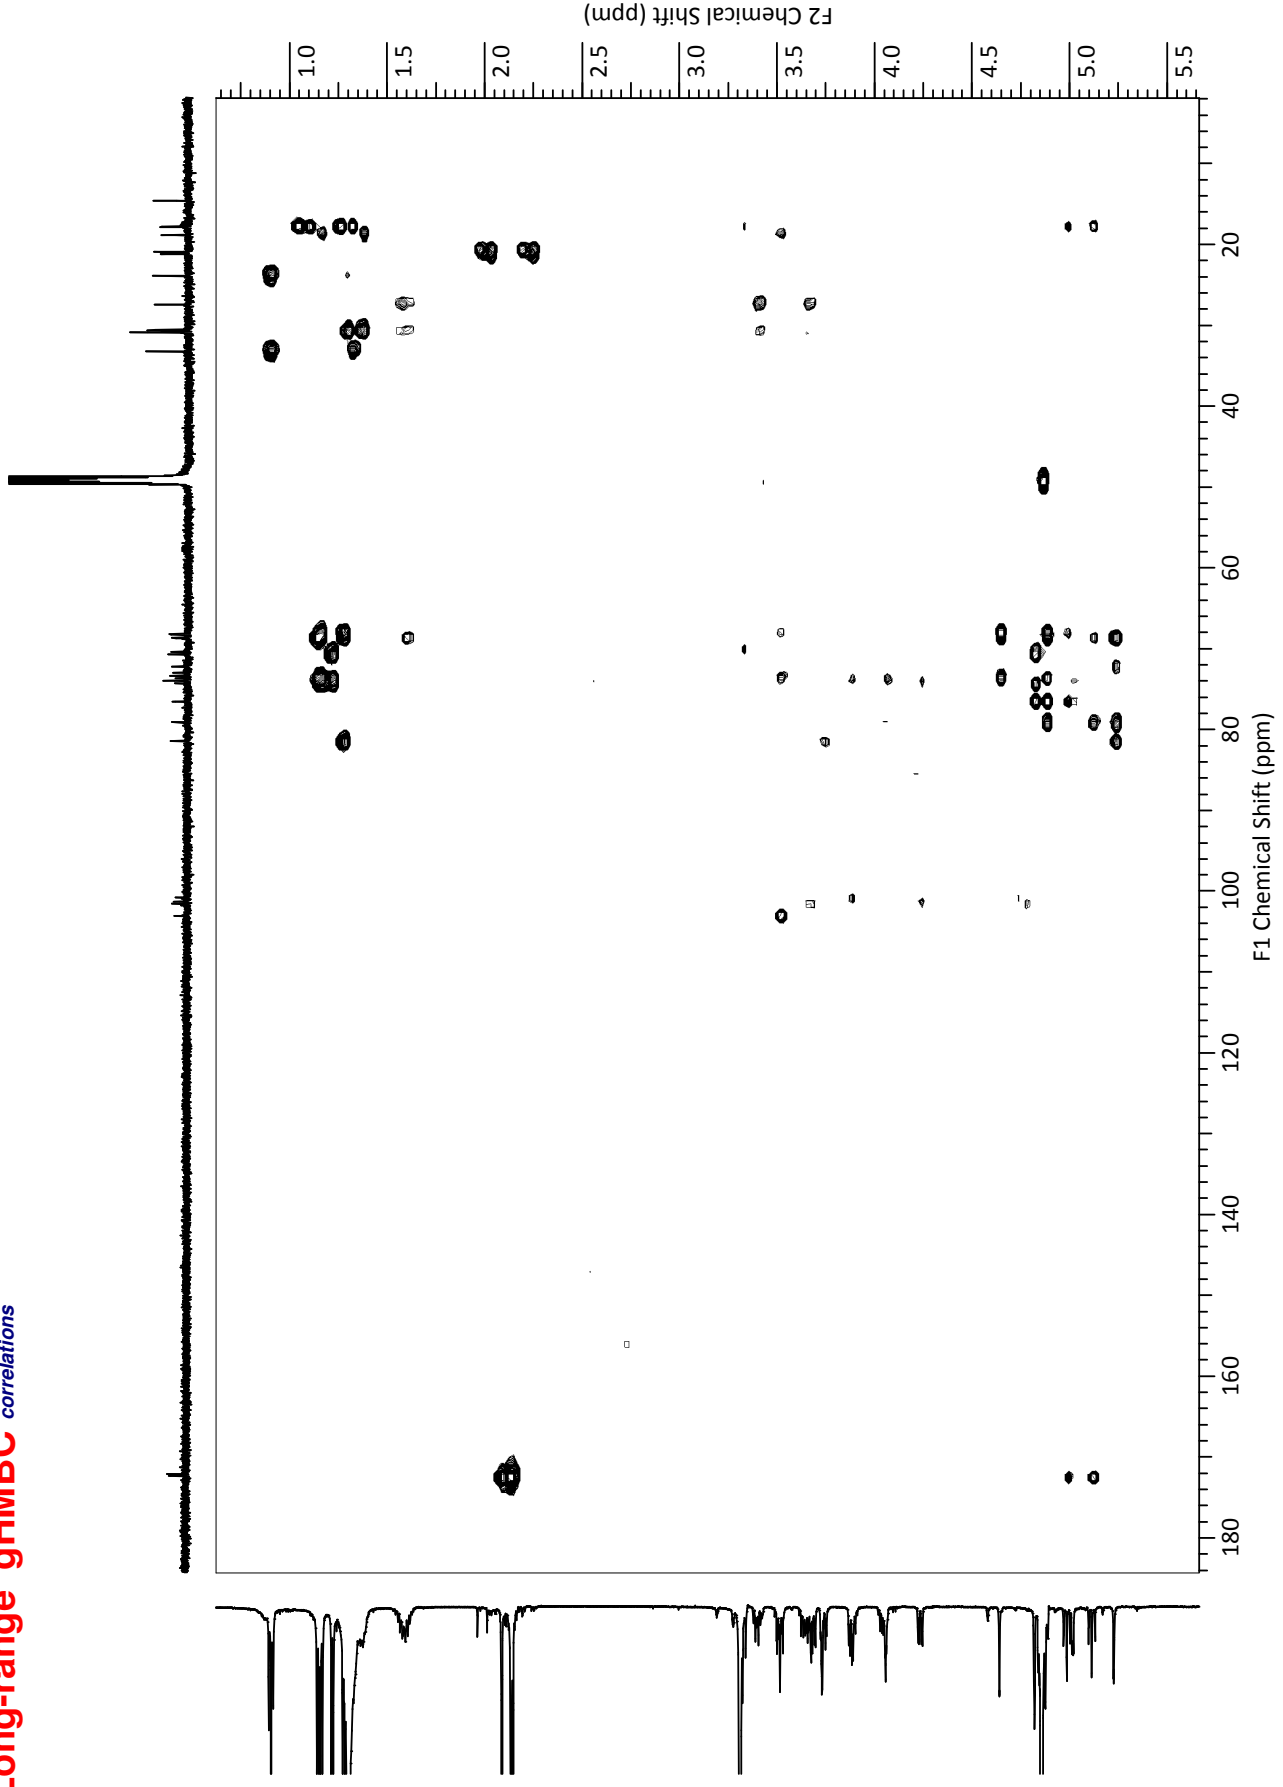

# Expansion of the contour plot of the gHMBC spectrum: Long-range **gHMBC** correlations

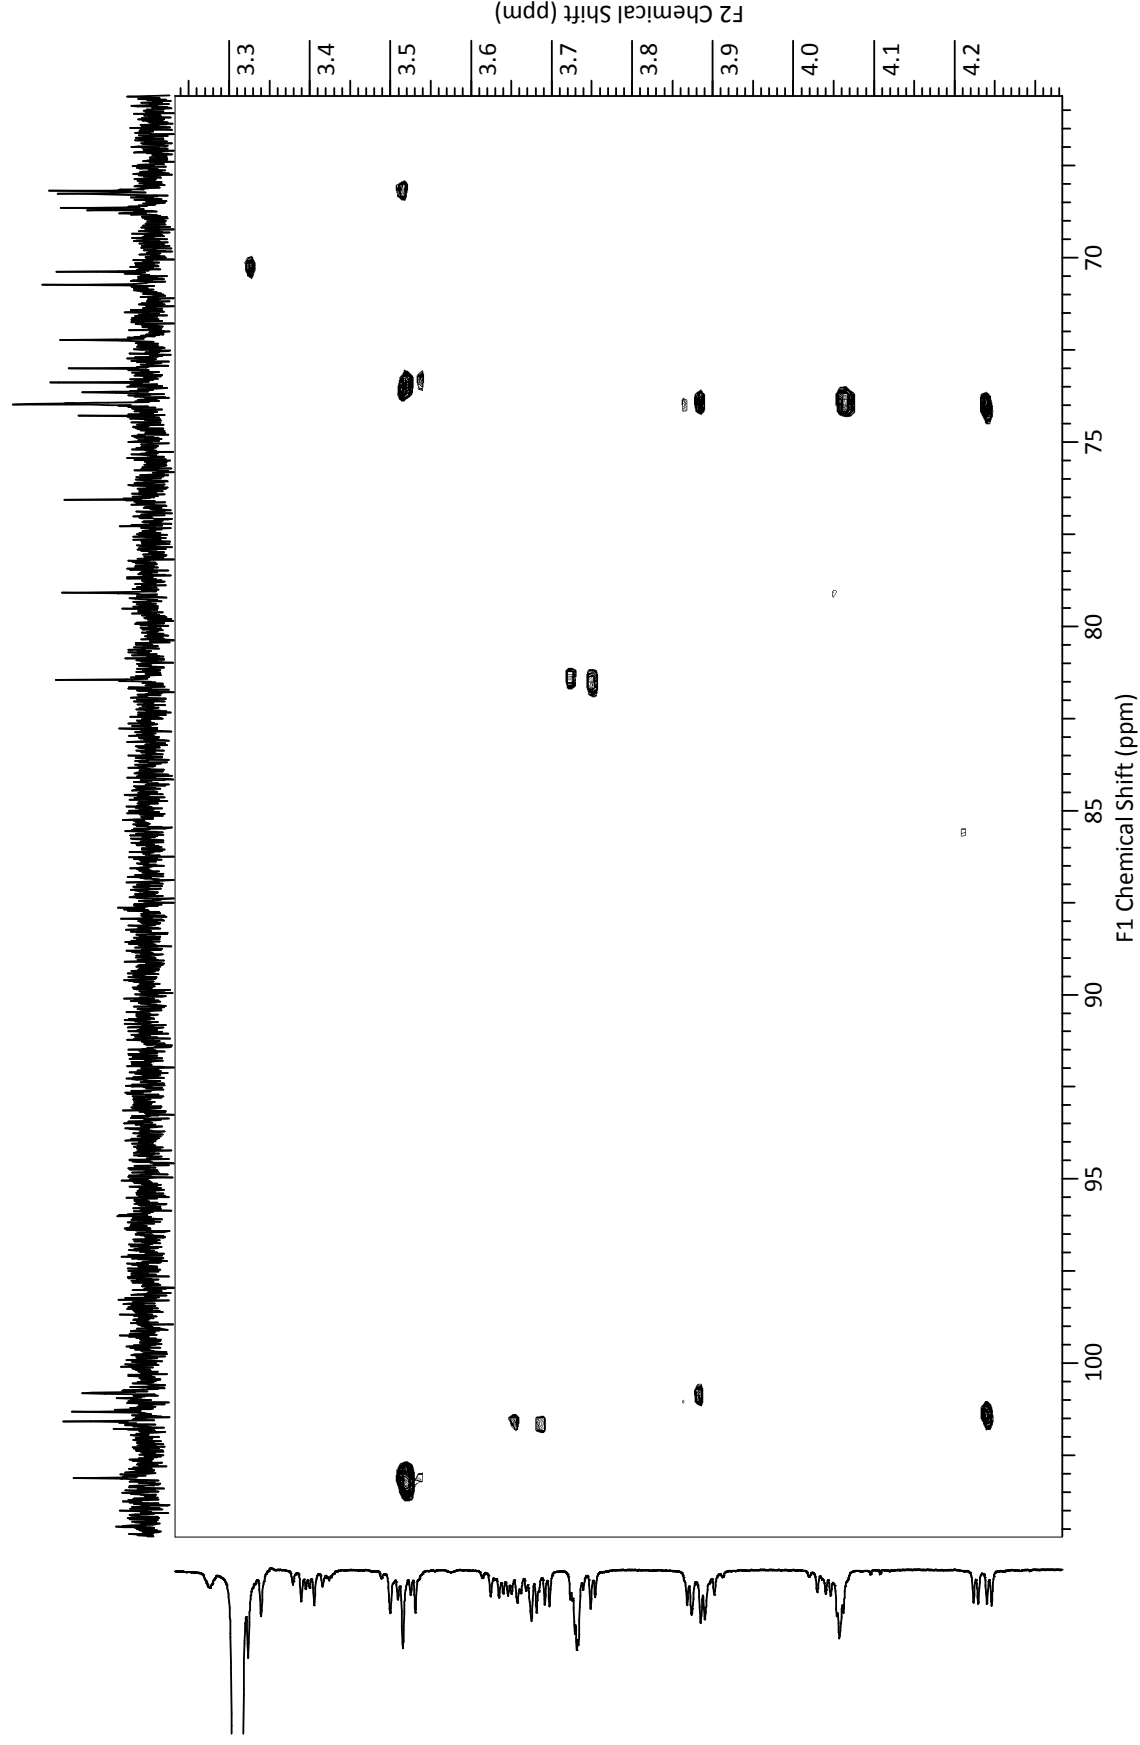

# HMBC

correlations (through three bond)  
confirming connectivities  
of four sugar units

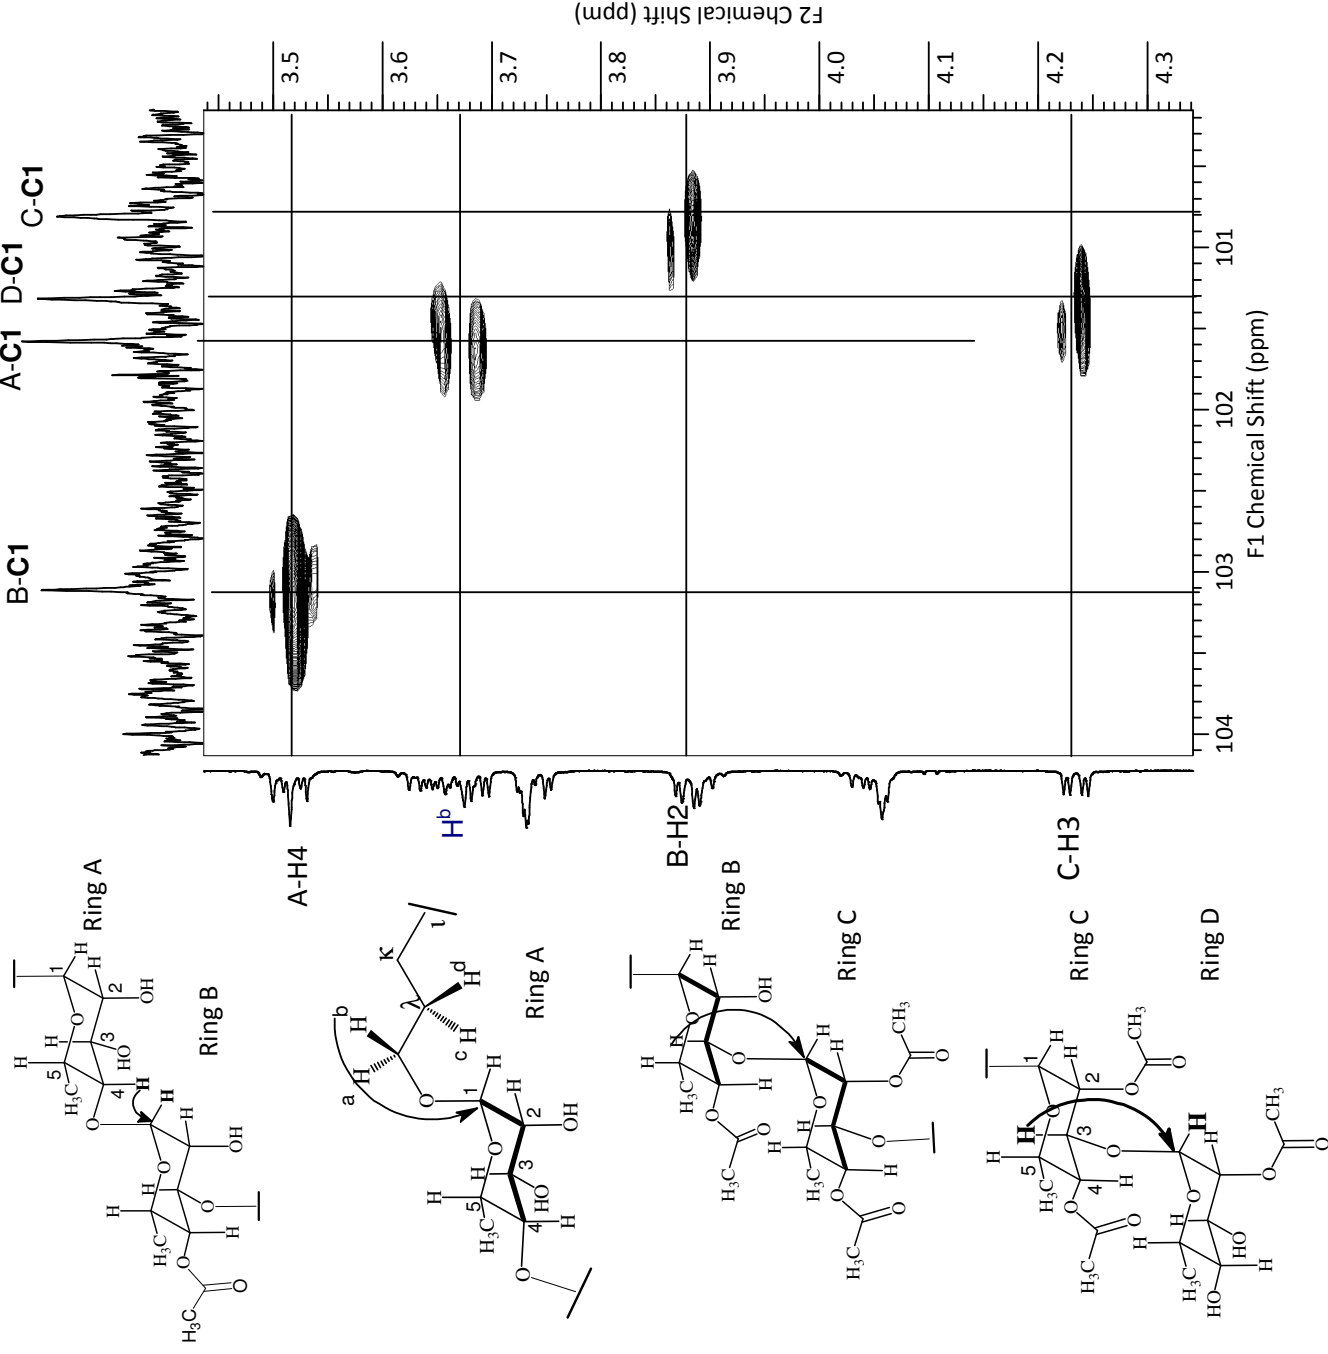

## Spin system identification for four sugar units (A-D)

**1D TOCSY experimental subspectra (a-d)**; selective excitation of A-H4 (a) and C-H4 (b) at 3.52 and 3.46 ppm respectively, mixing time = 260 ms; (c) and (d) spectra were obtained with mix time of 260 ms: selective excitation of 5-CH<sub>3</sub>'s at 1.10 and 1.14 ppm respectively; Control <sup>1</sup>H NMR spectrum (e).

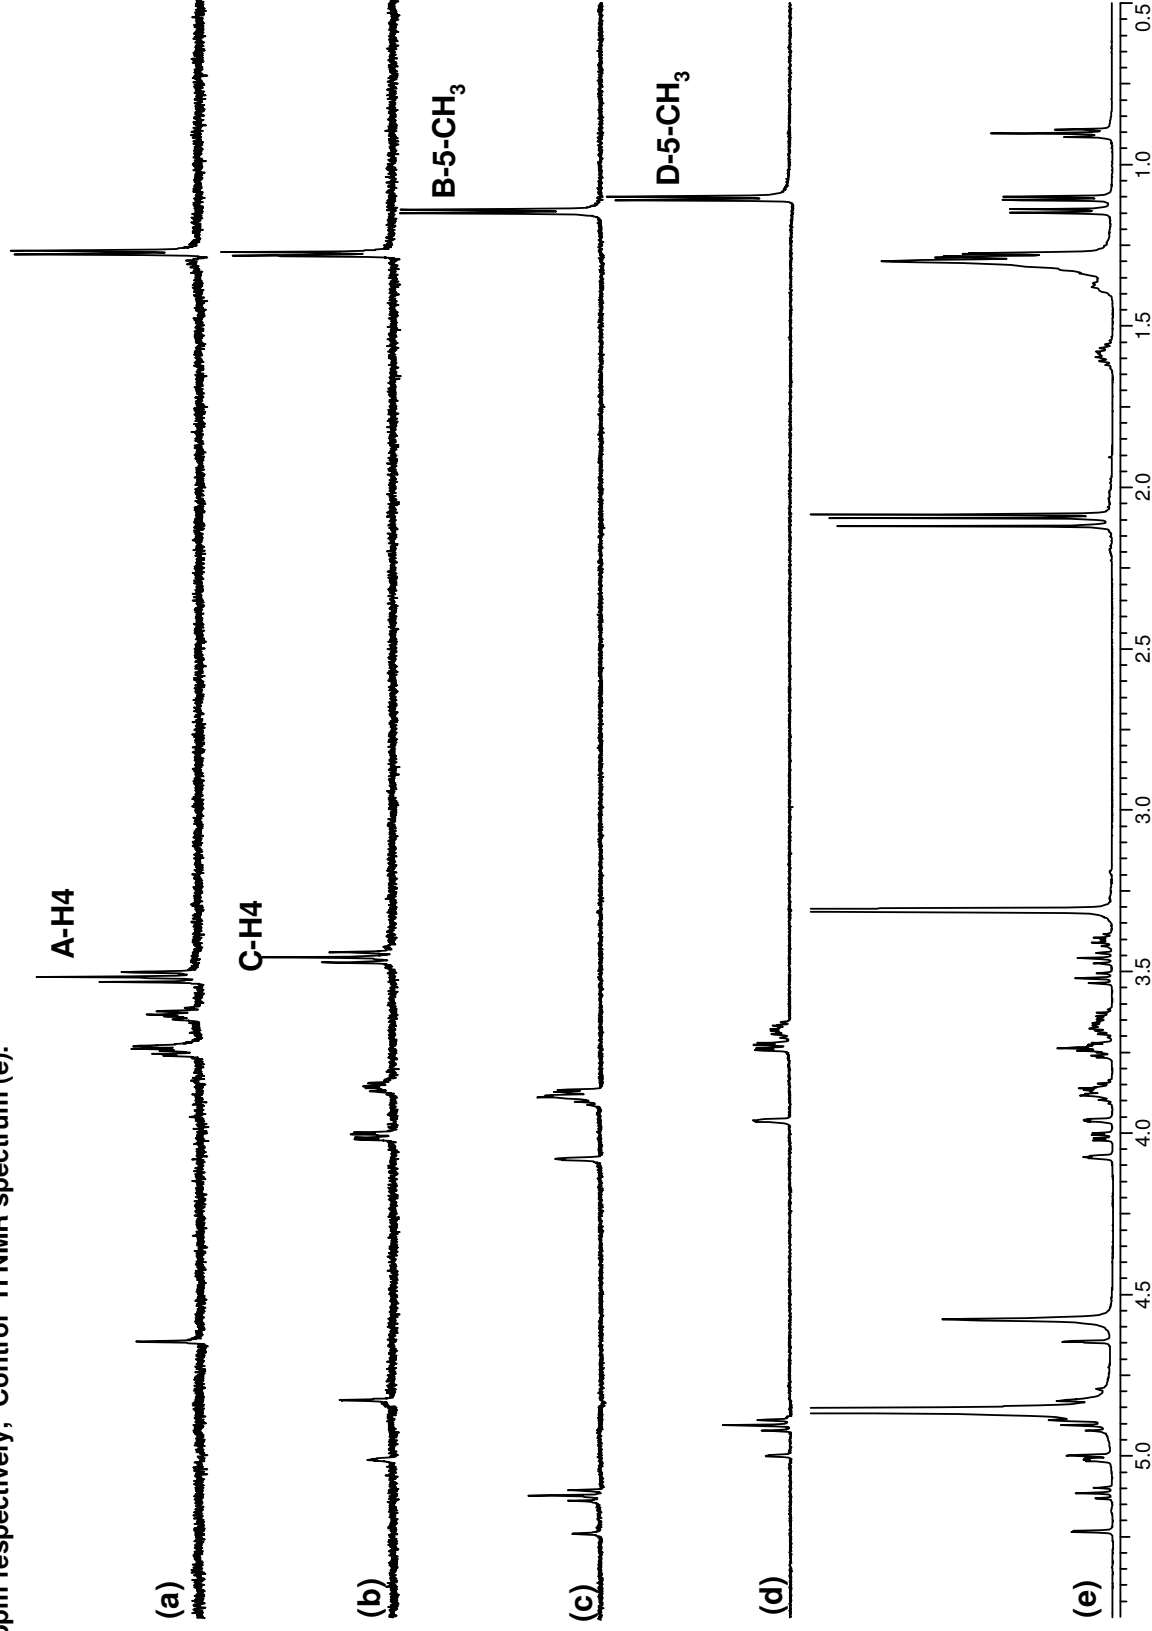

**Expanded regions of the  
1D TOCSY spectra**

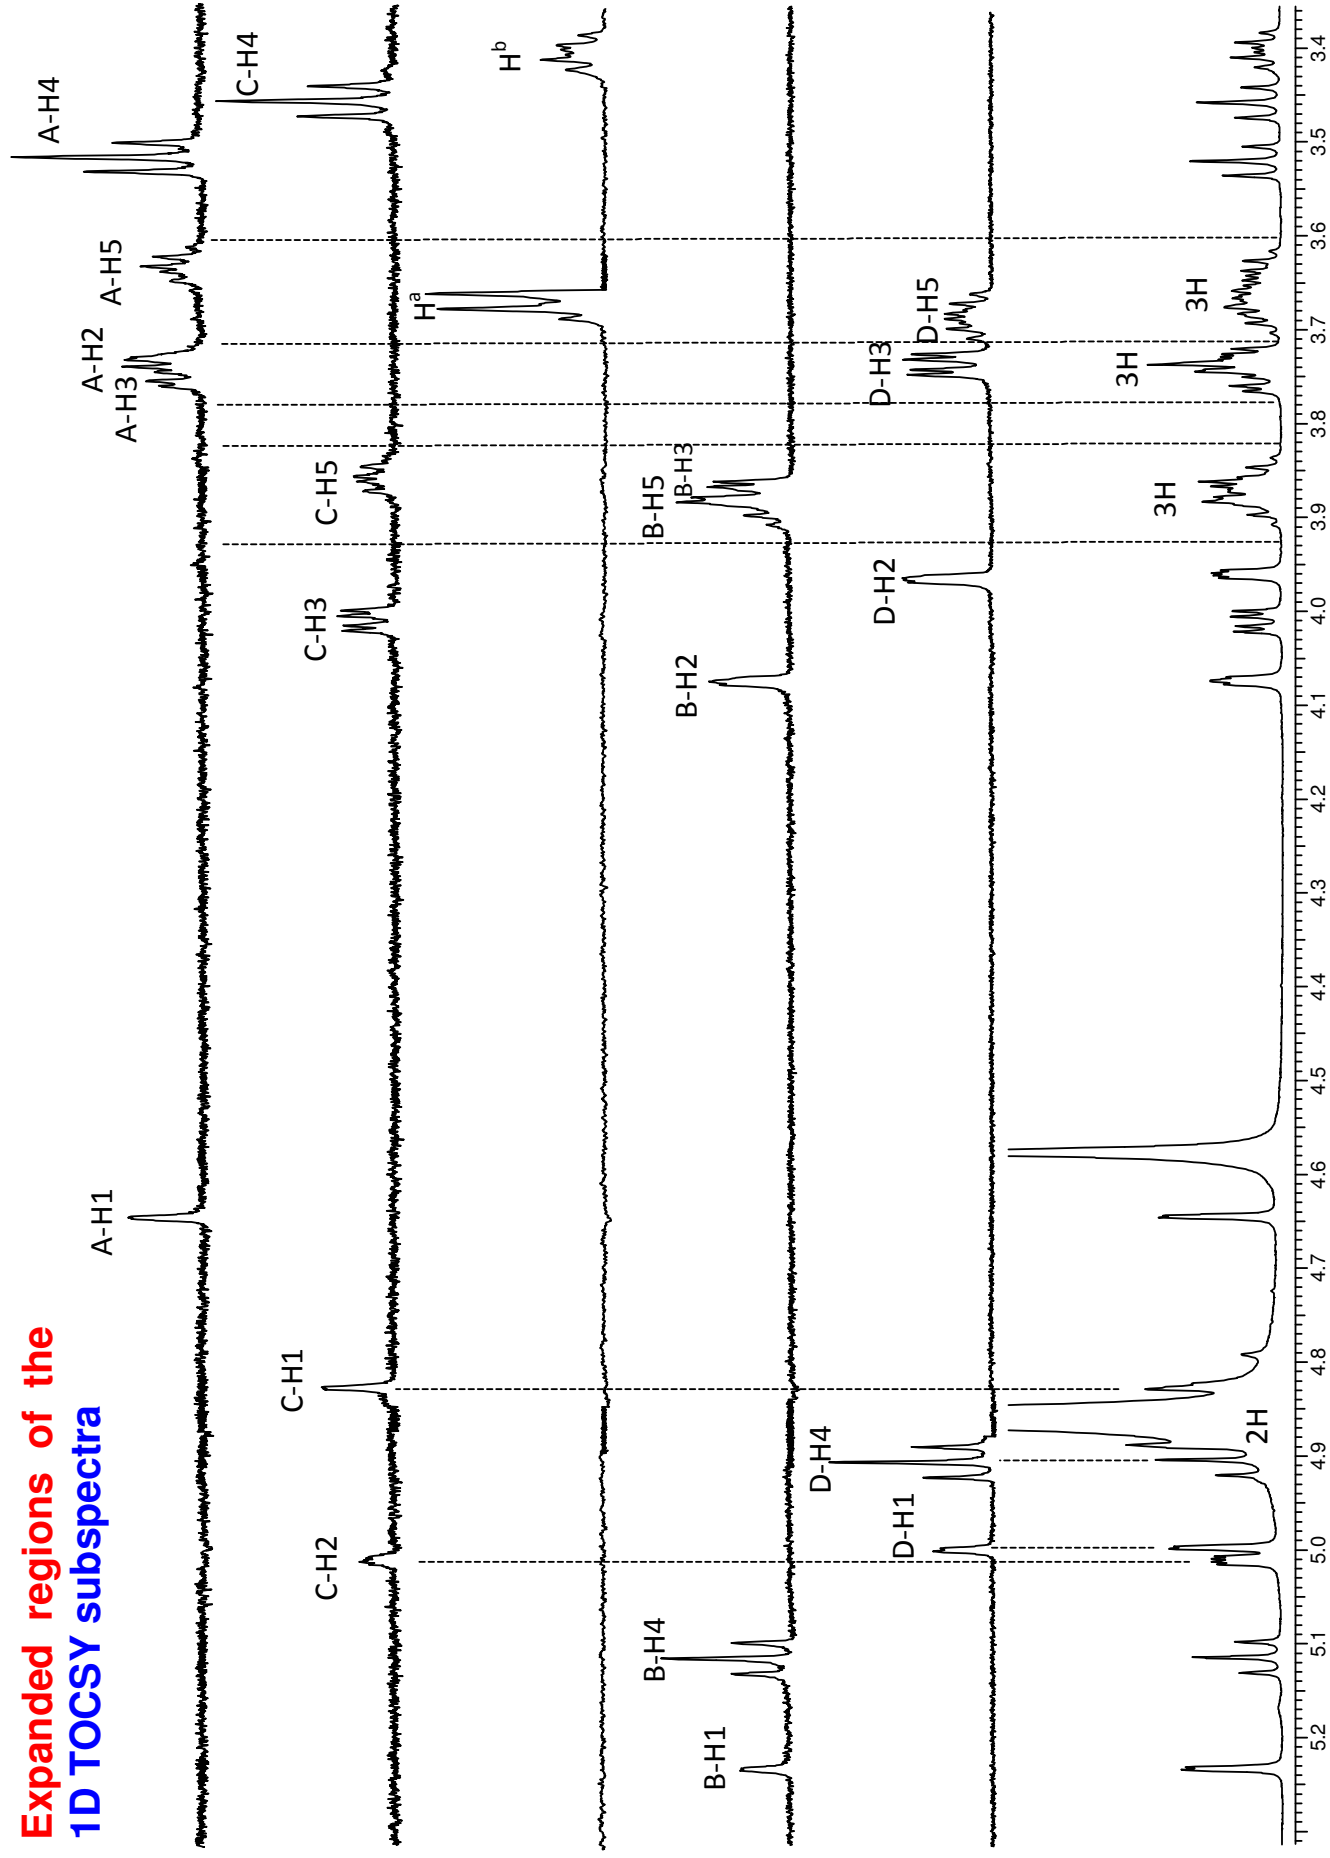

Selective excitation of H<sup>a</sup> at 3.39 ppm (mix = 160 ms)

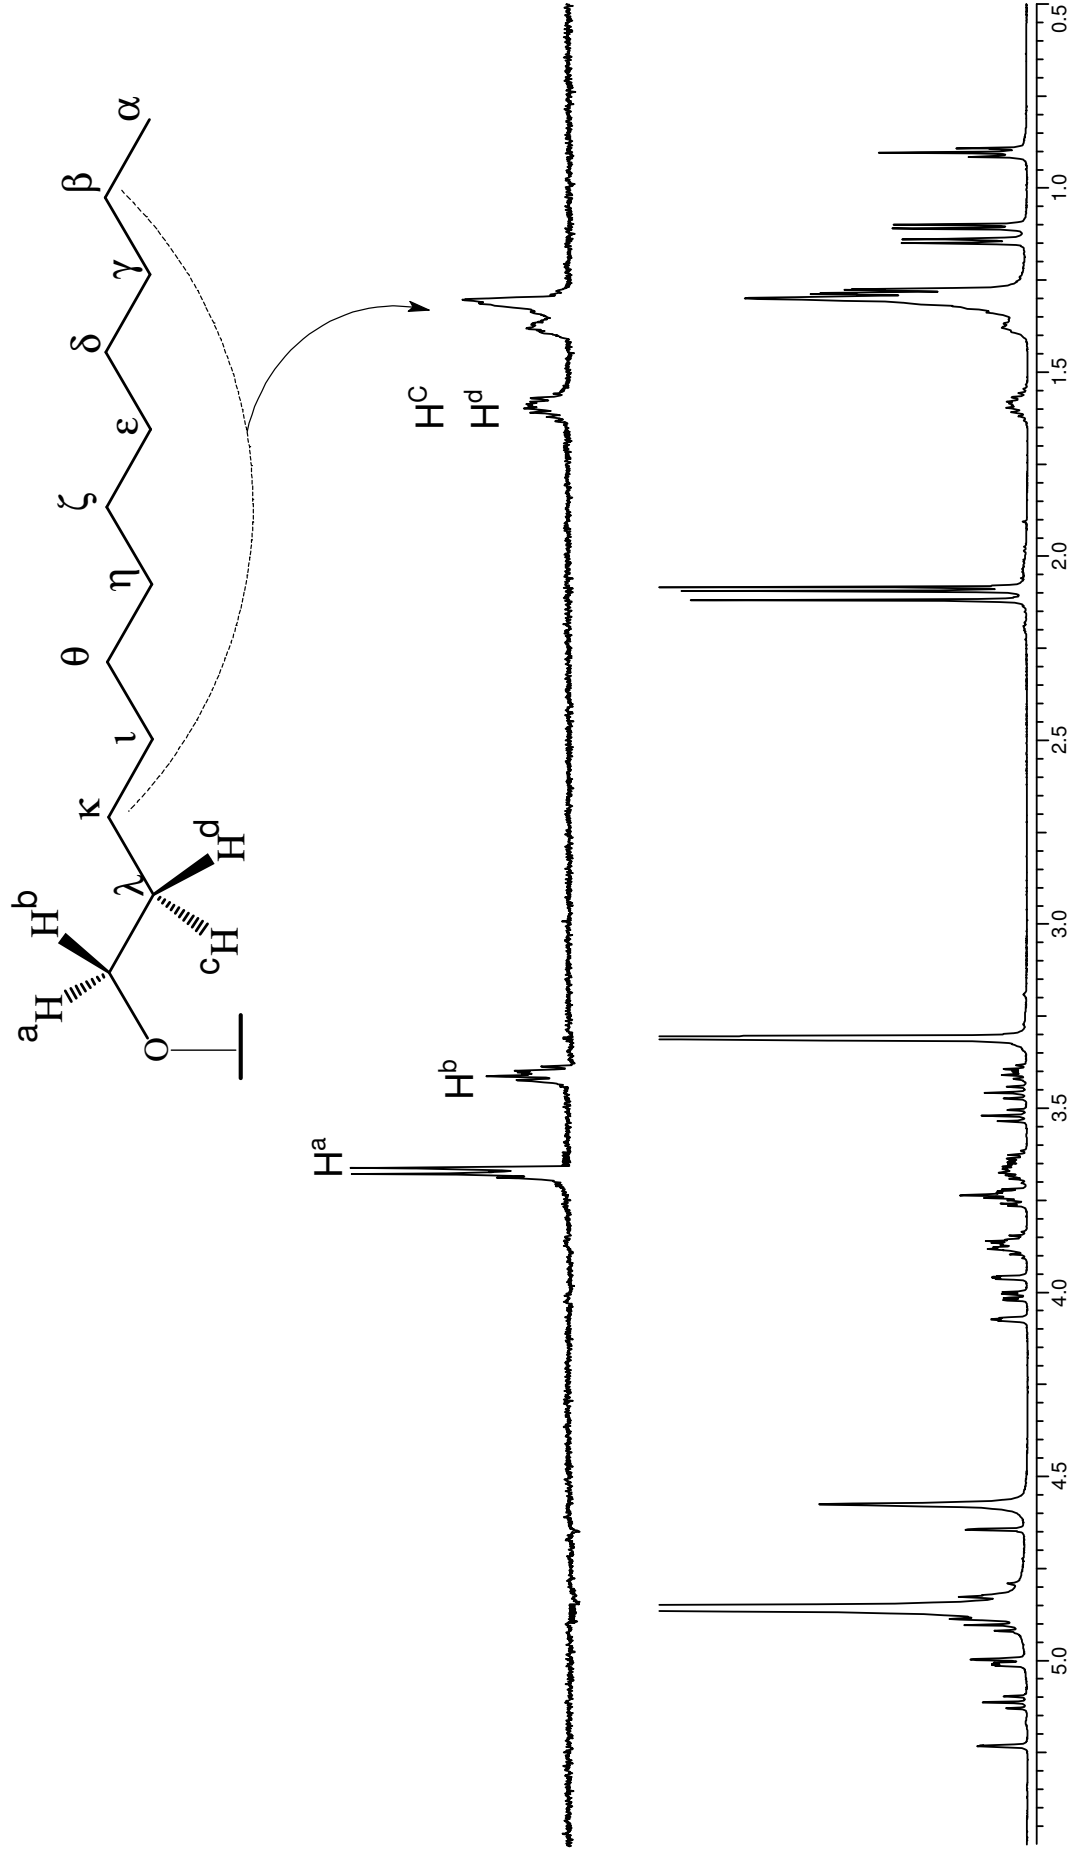

# Chemical shifts of 5-CH<sub>3</sub> 's of A and C sugar units

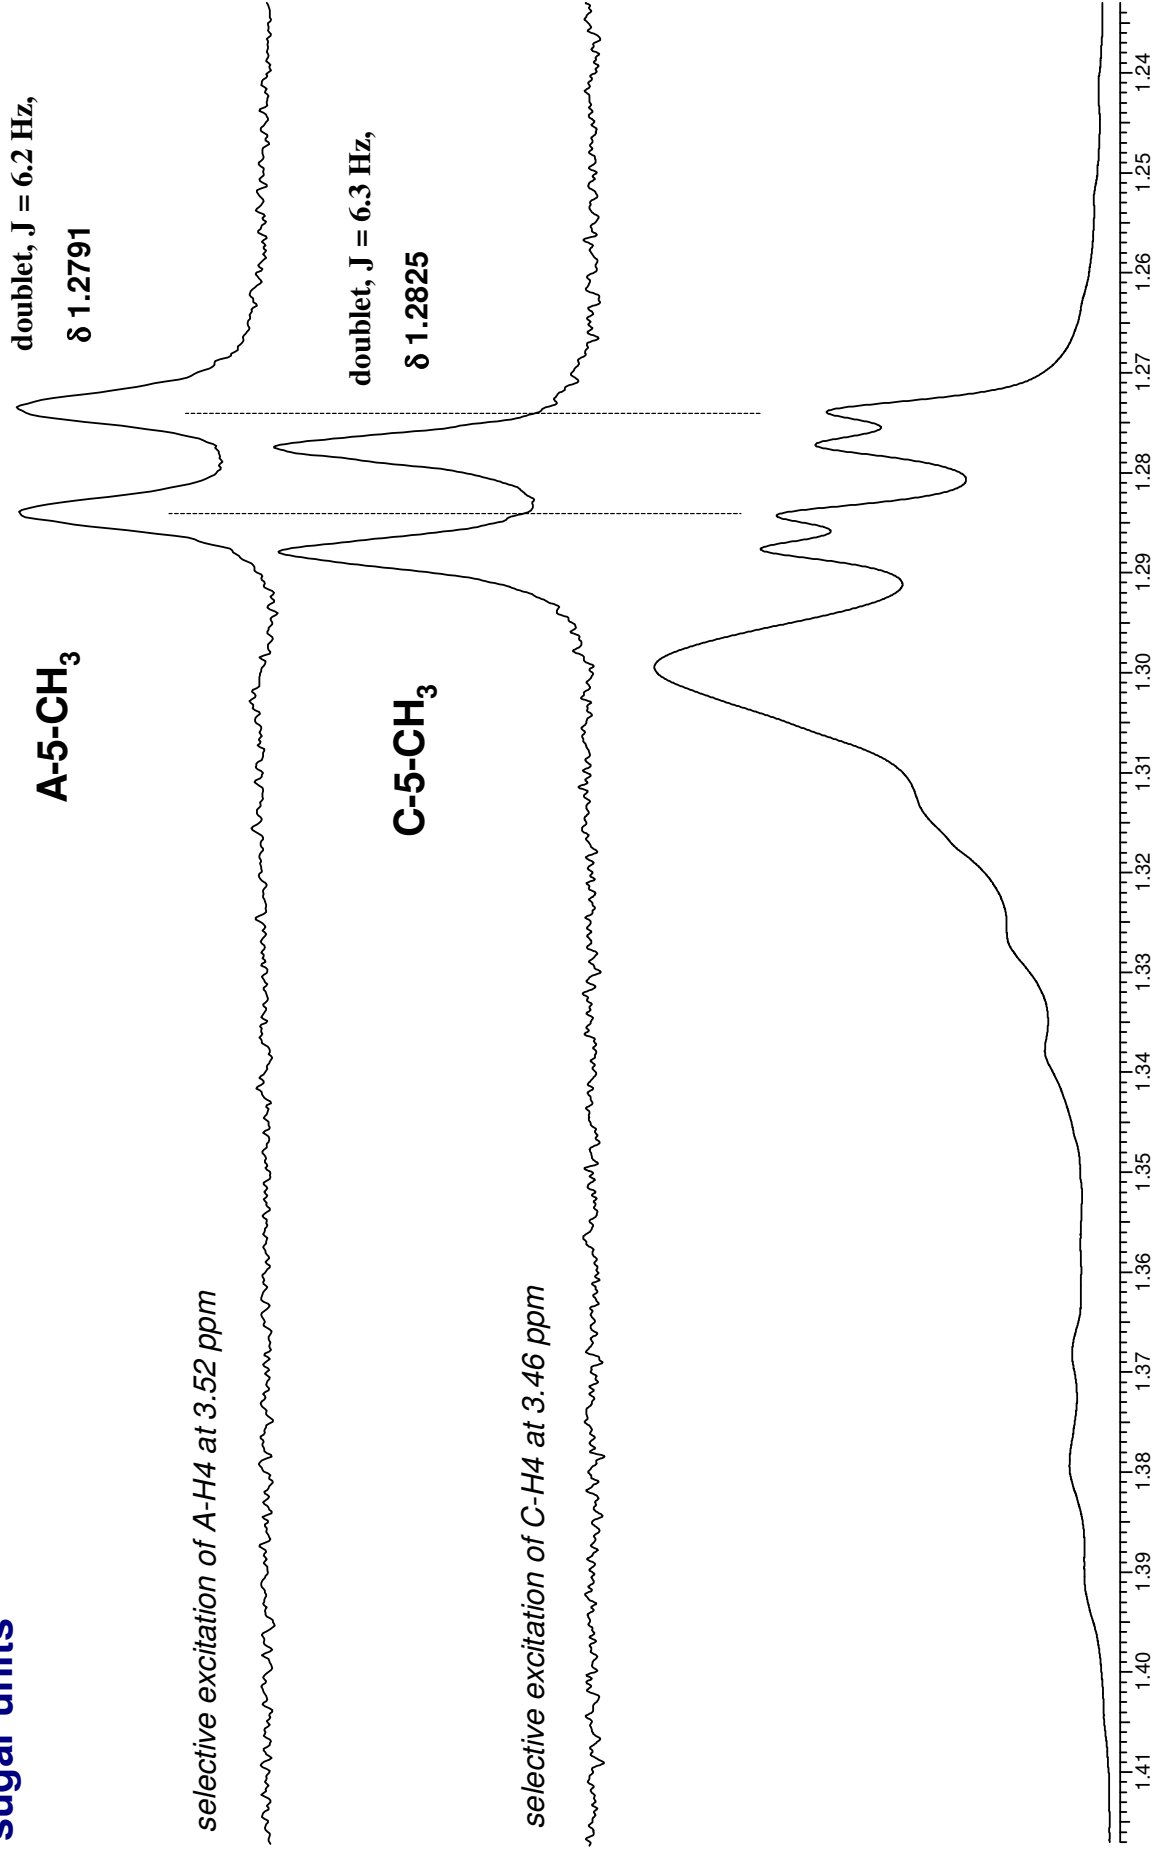

**Observed mutual (or reversible) nOe between H<sup>a</sup> and A-H1**

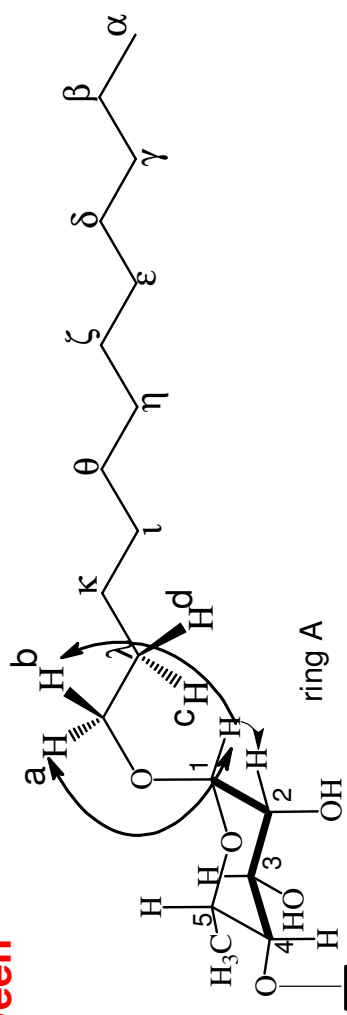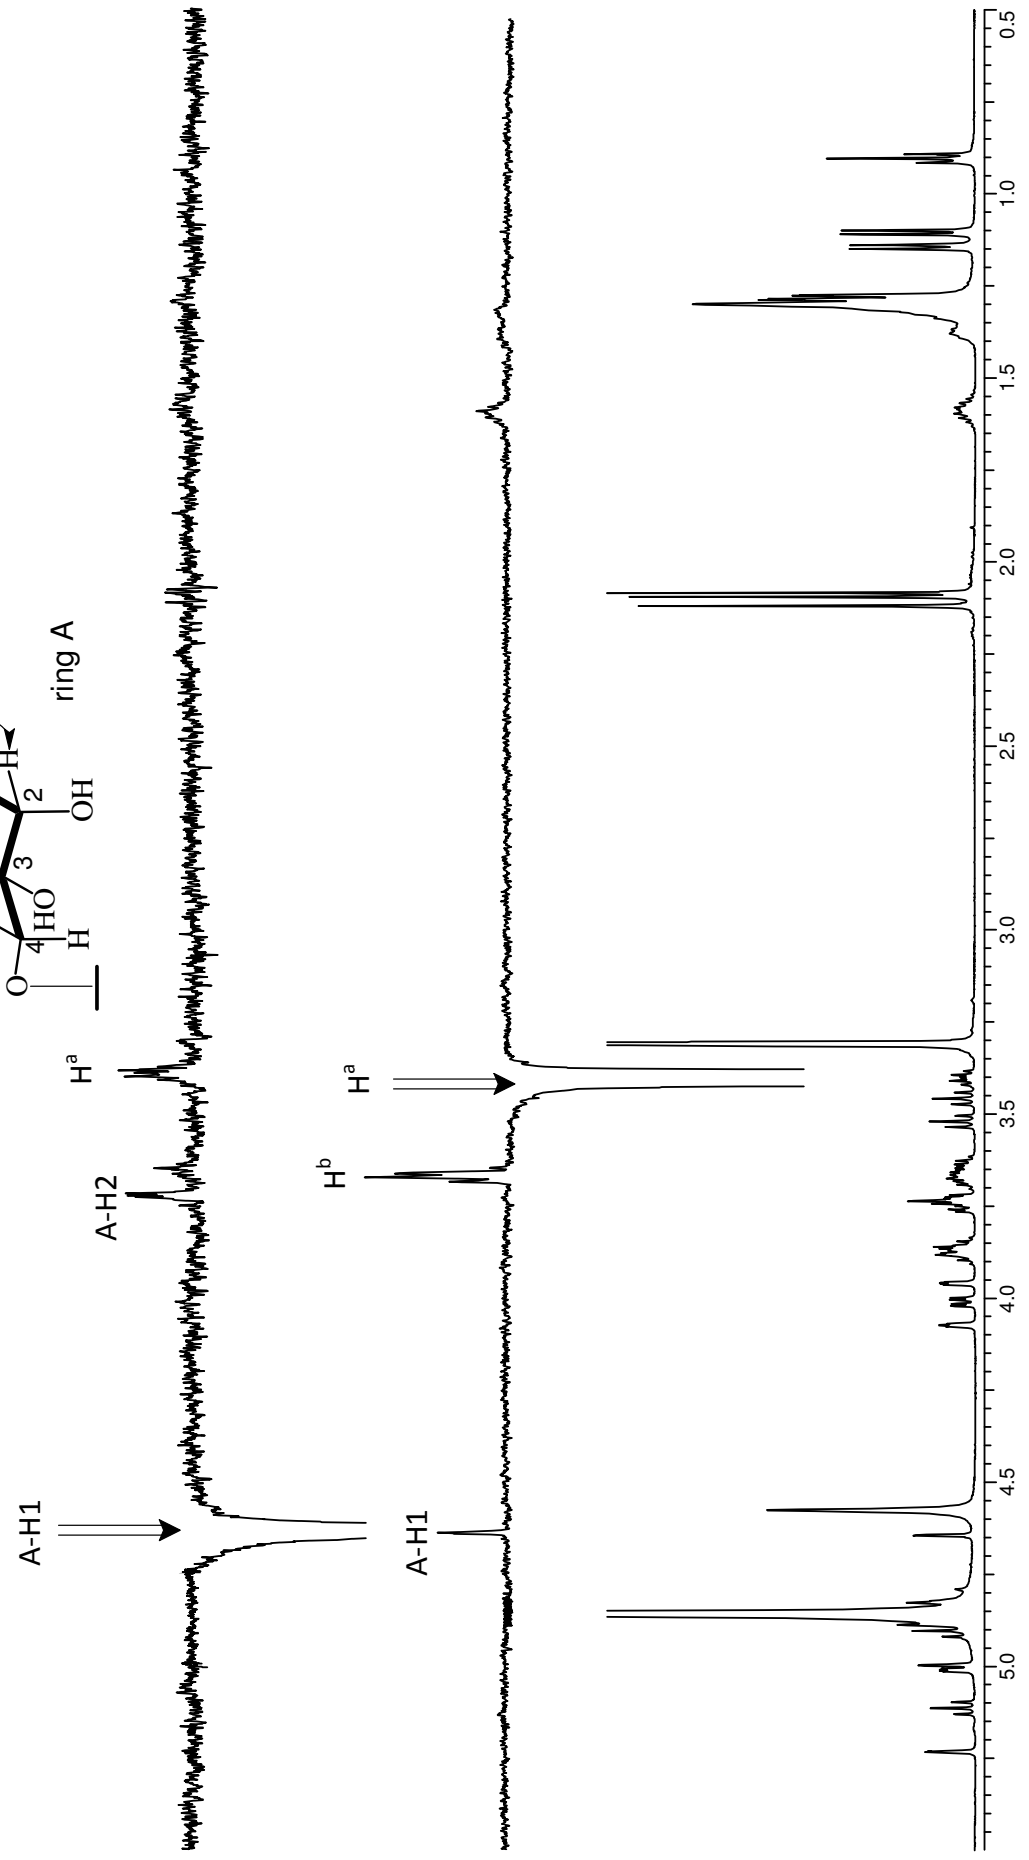



# DPFGSENOE spectrum

Through space connectivity between two rings: **A (H1, 3.5198 ppm)** and **B (H1, 5.2302 ppm)**

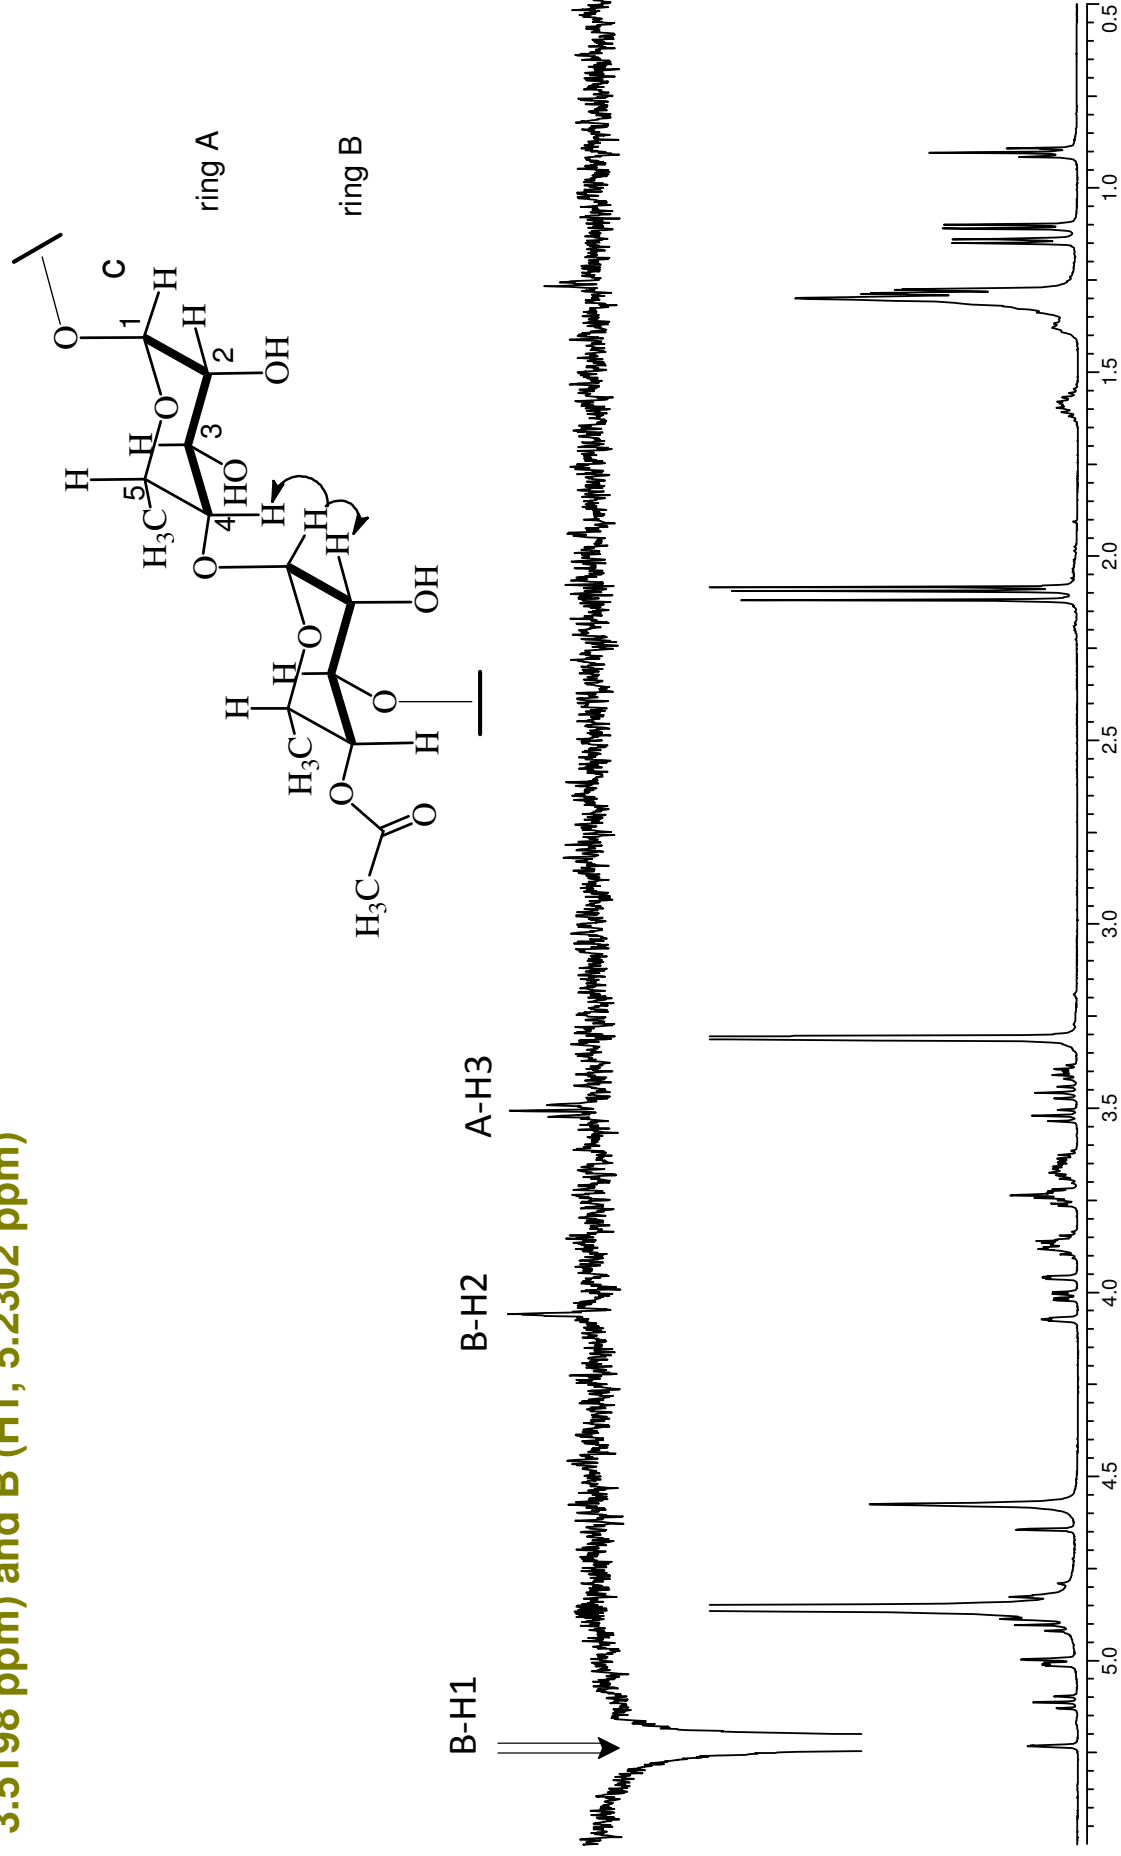

# DPFGSENOE spectrum

Through space connectivity between two rings:

**C (H3, 4.088 ppm) and D (H1, 4.9943 ppm)**

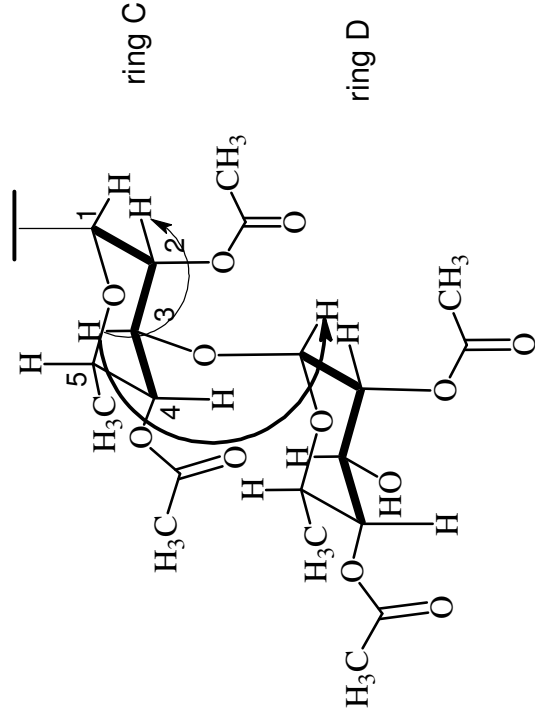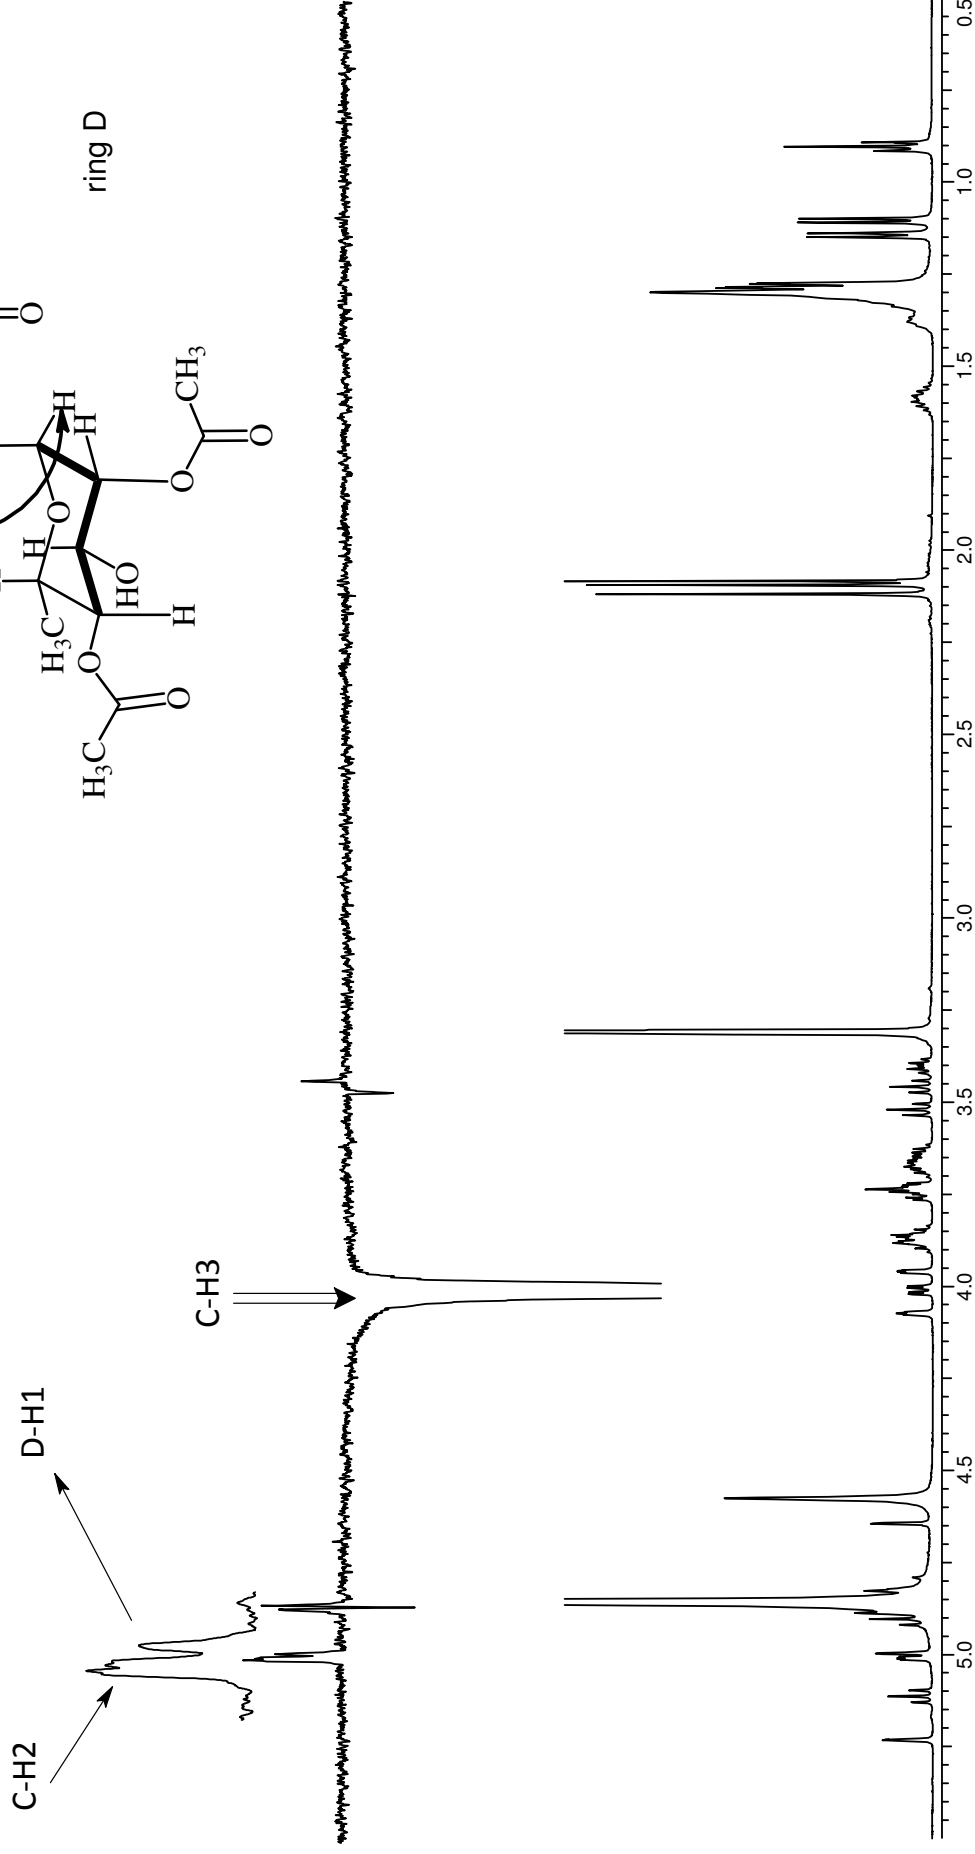

# gCOSY

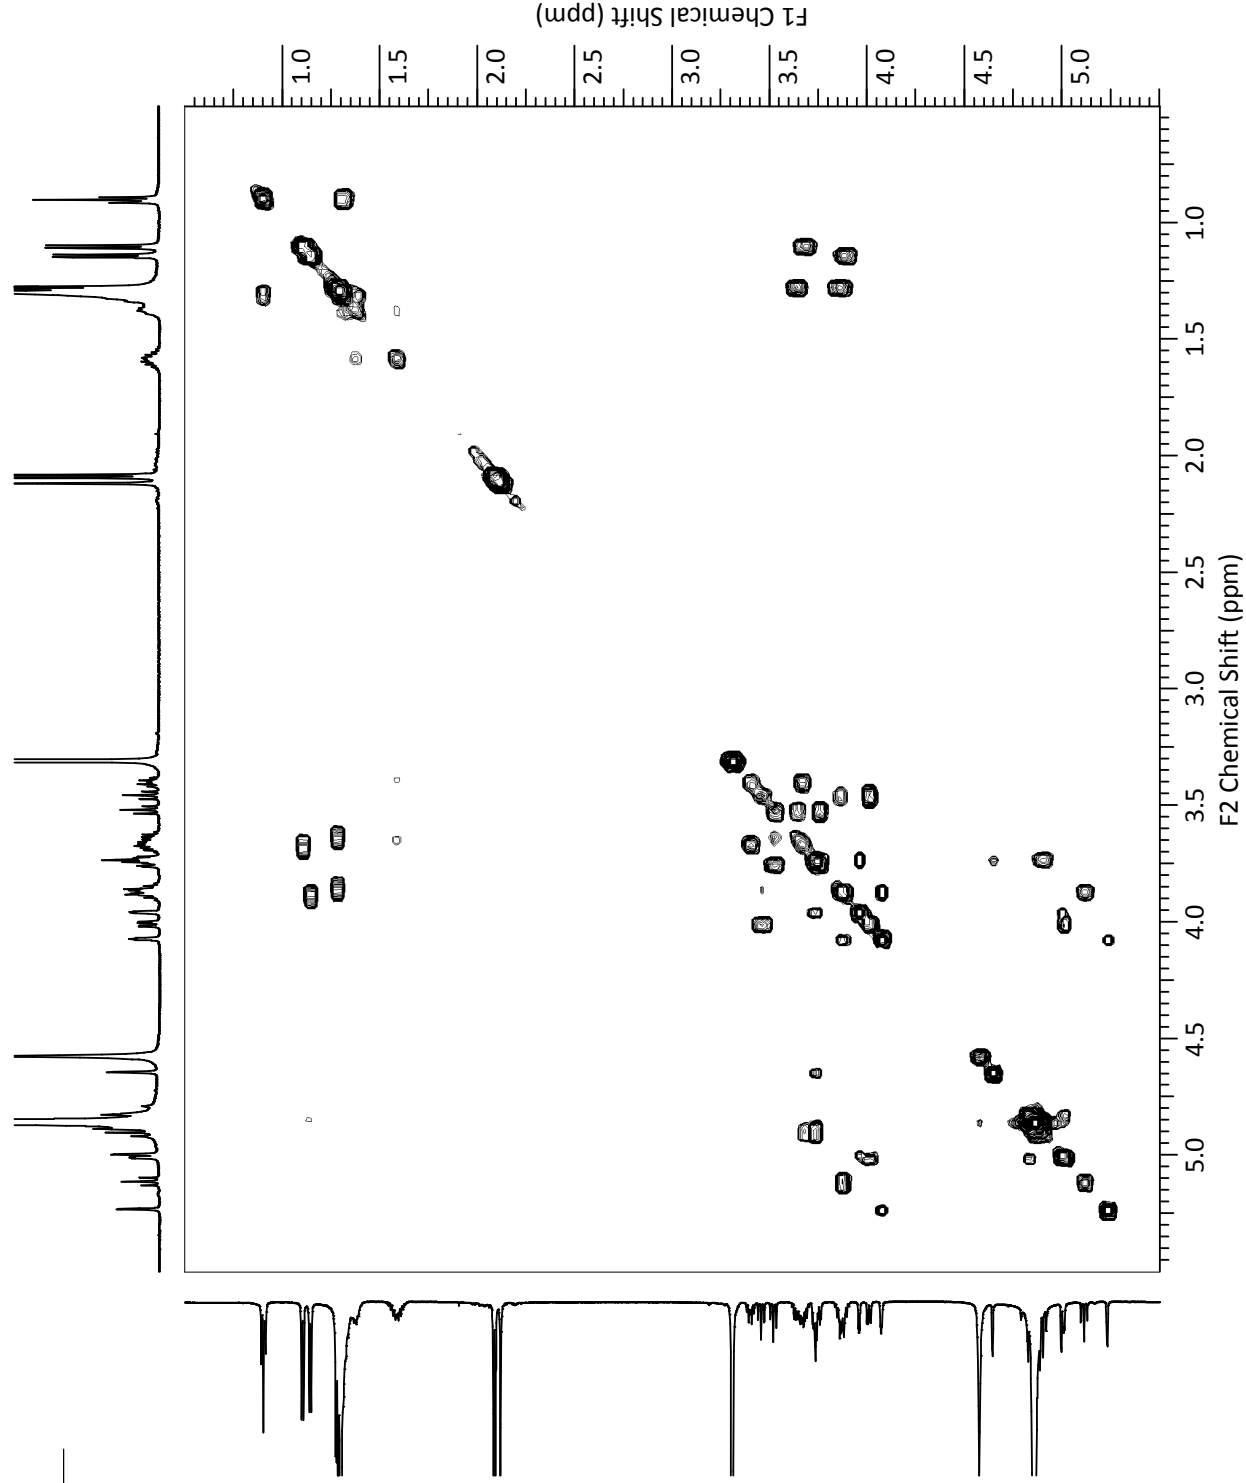

# gCOSY

Expanded portion of the gCOSY spectrum

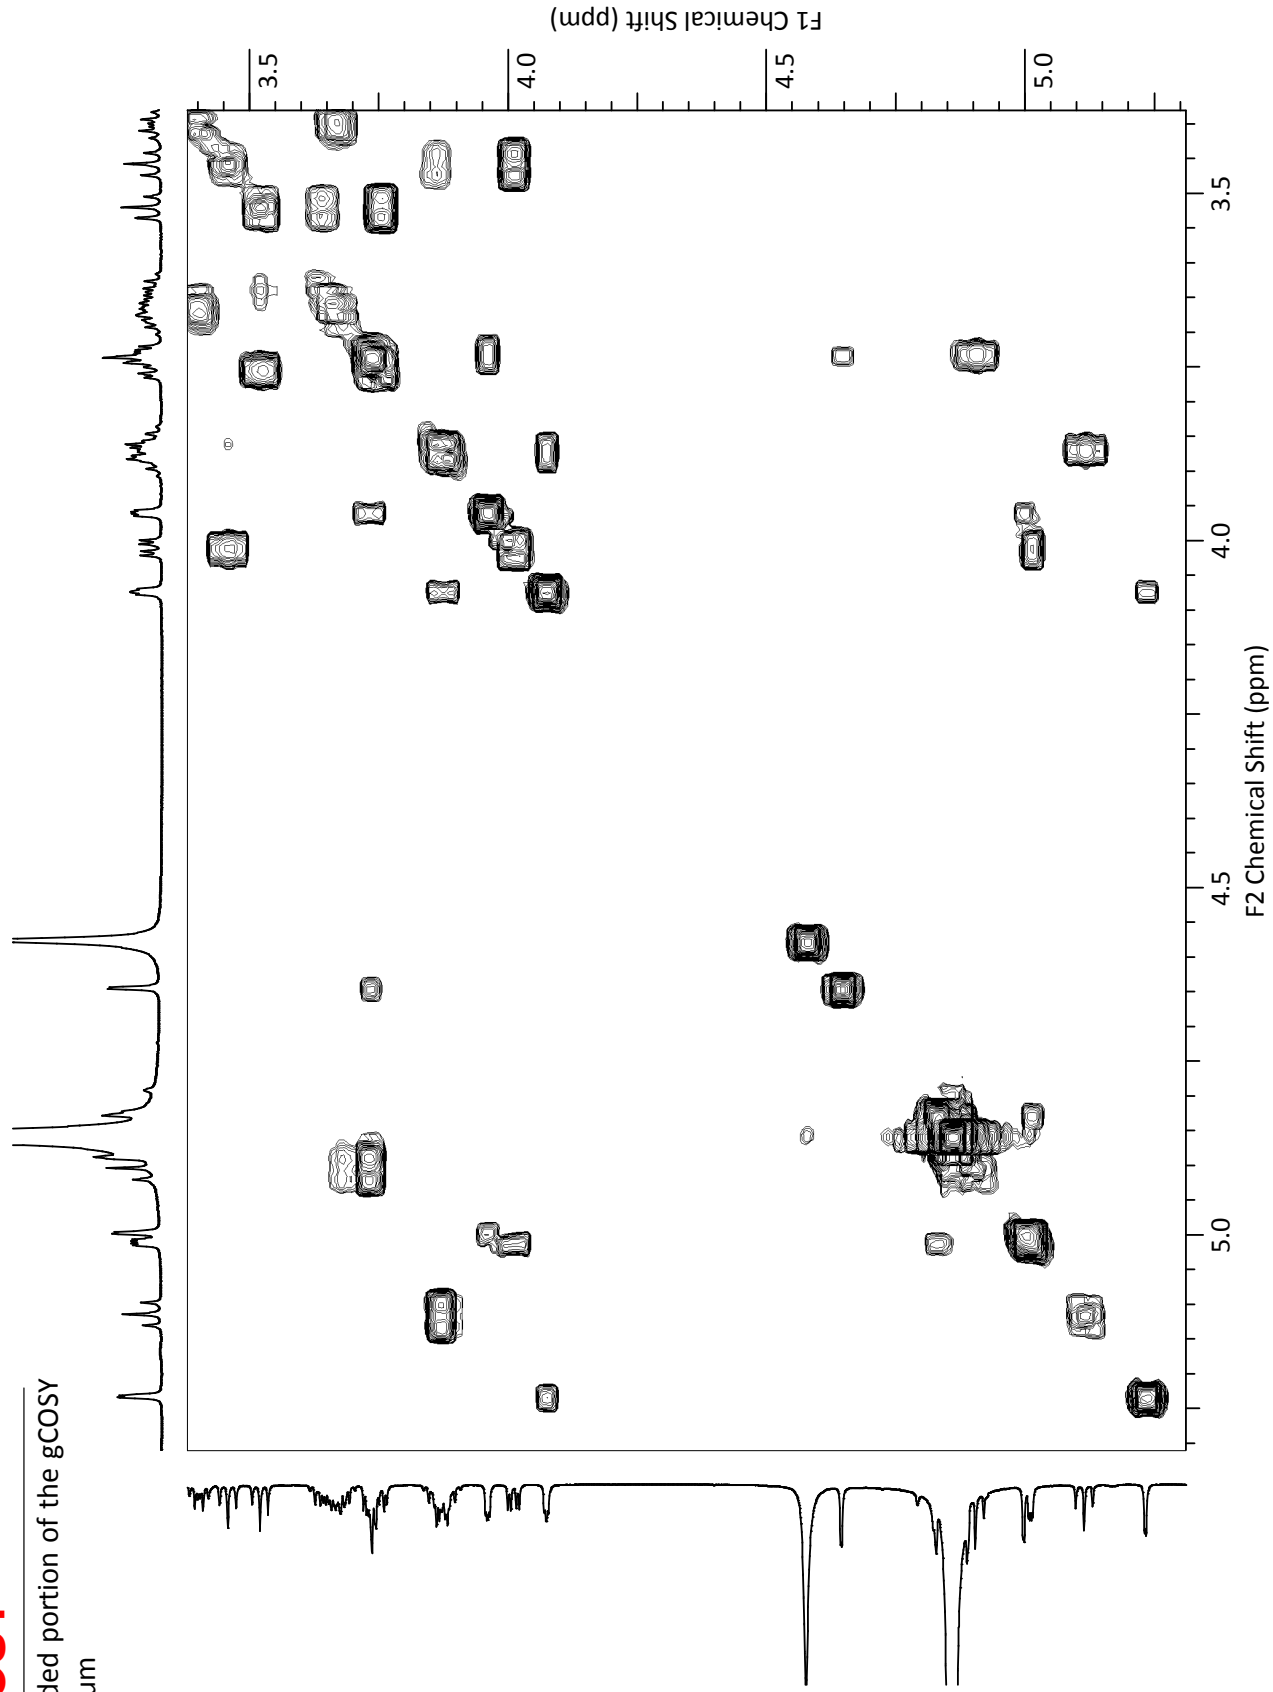

# HETCOR

One-bond heteronuclear correlations

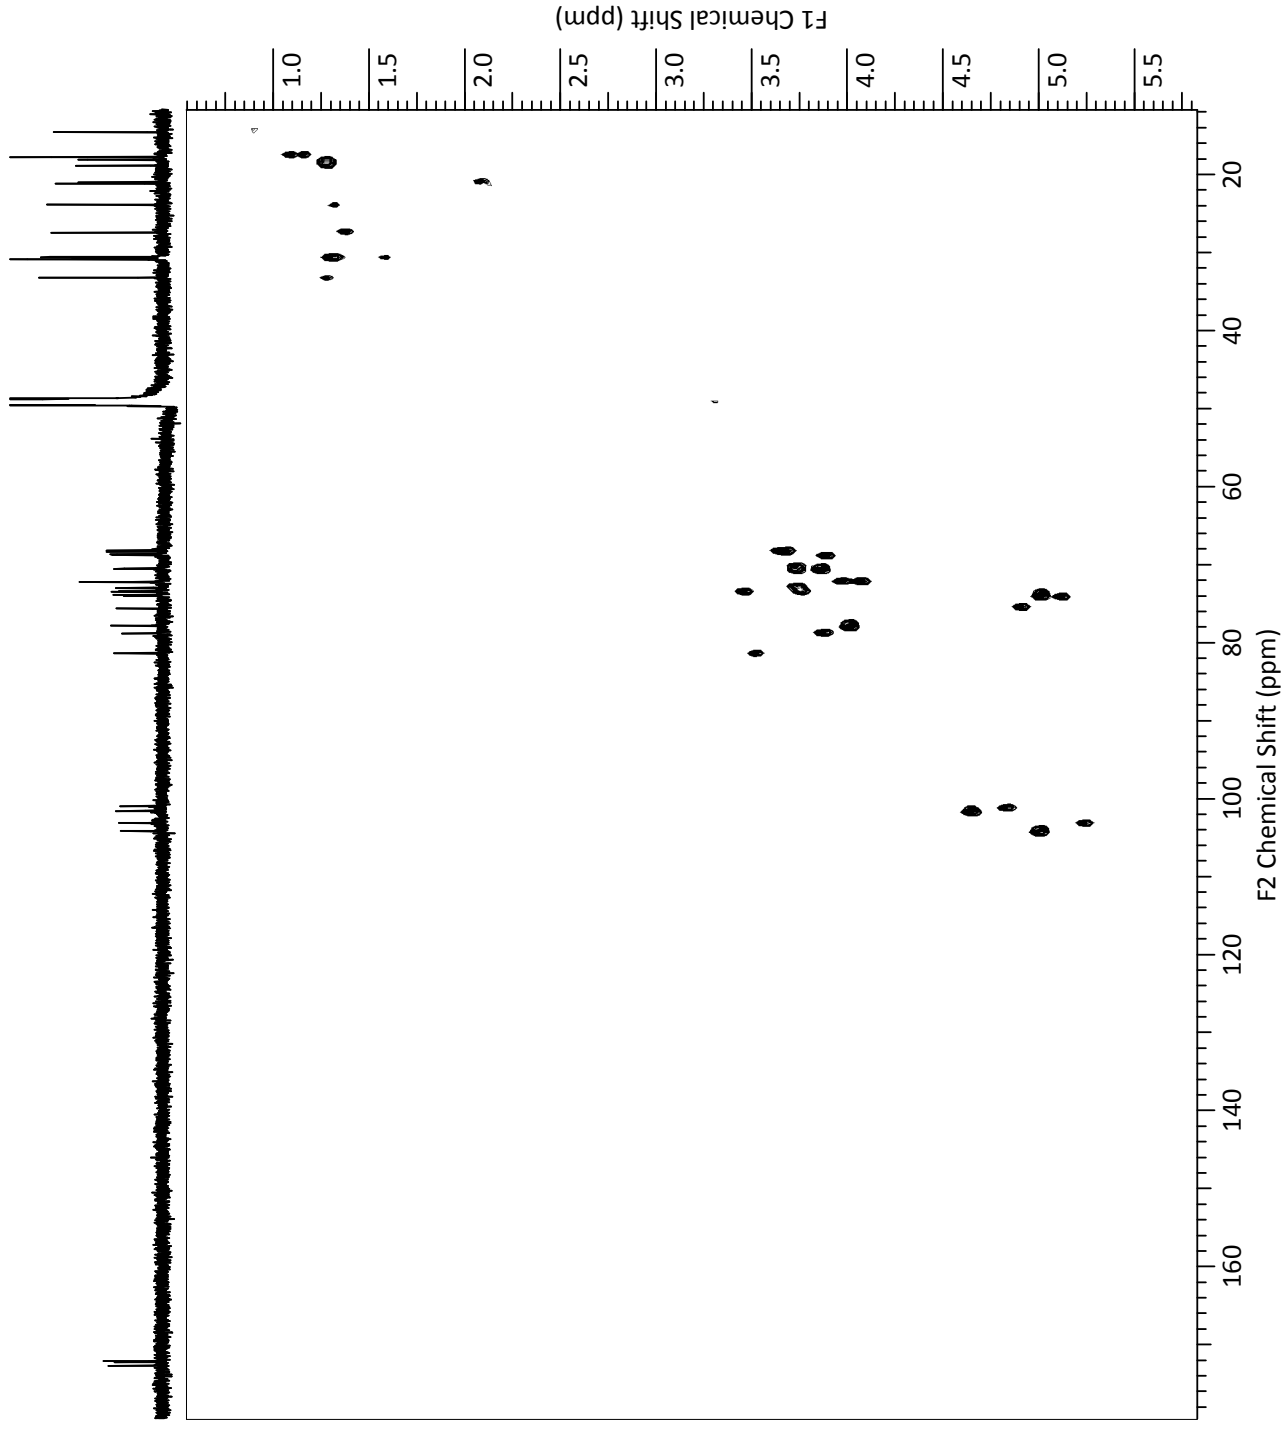

# HETCOR

Expanded portion of the  
HETCOR spectrum

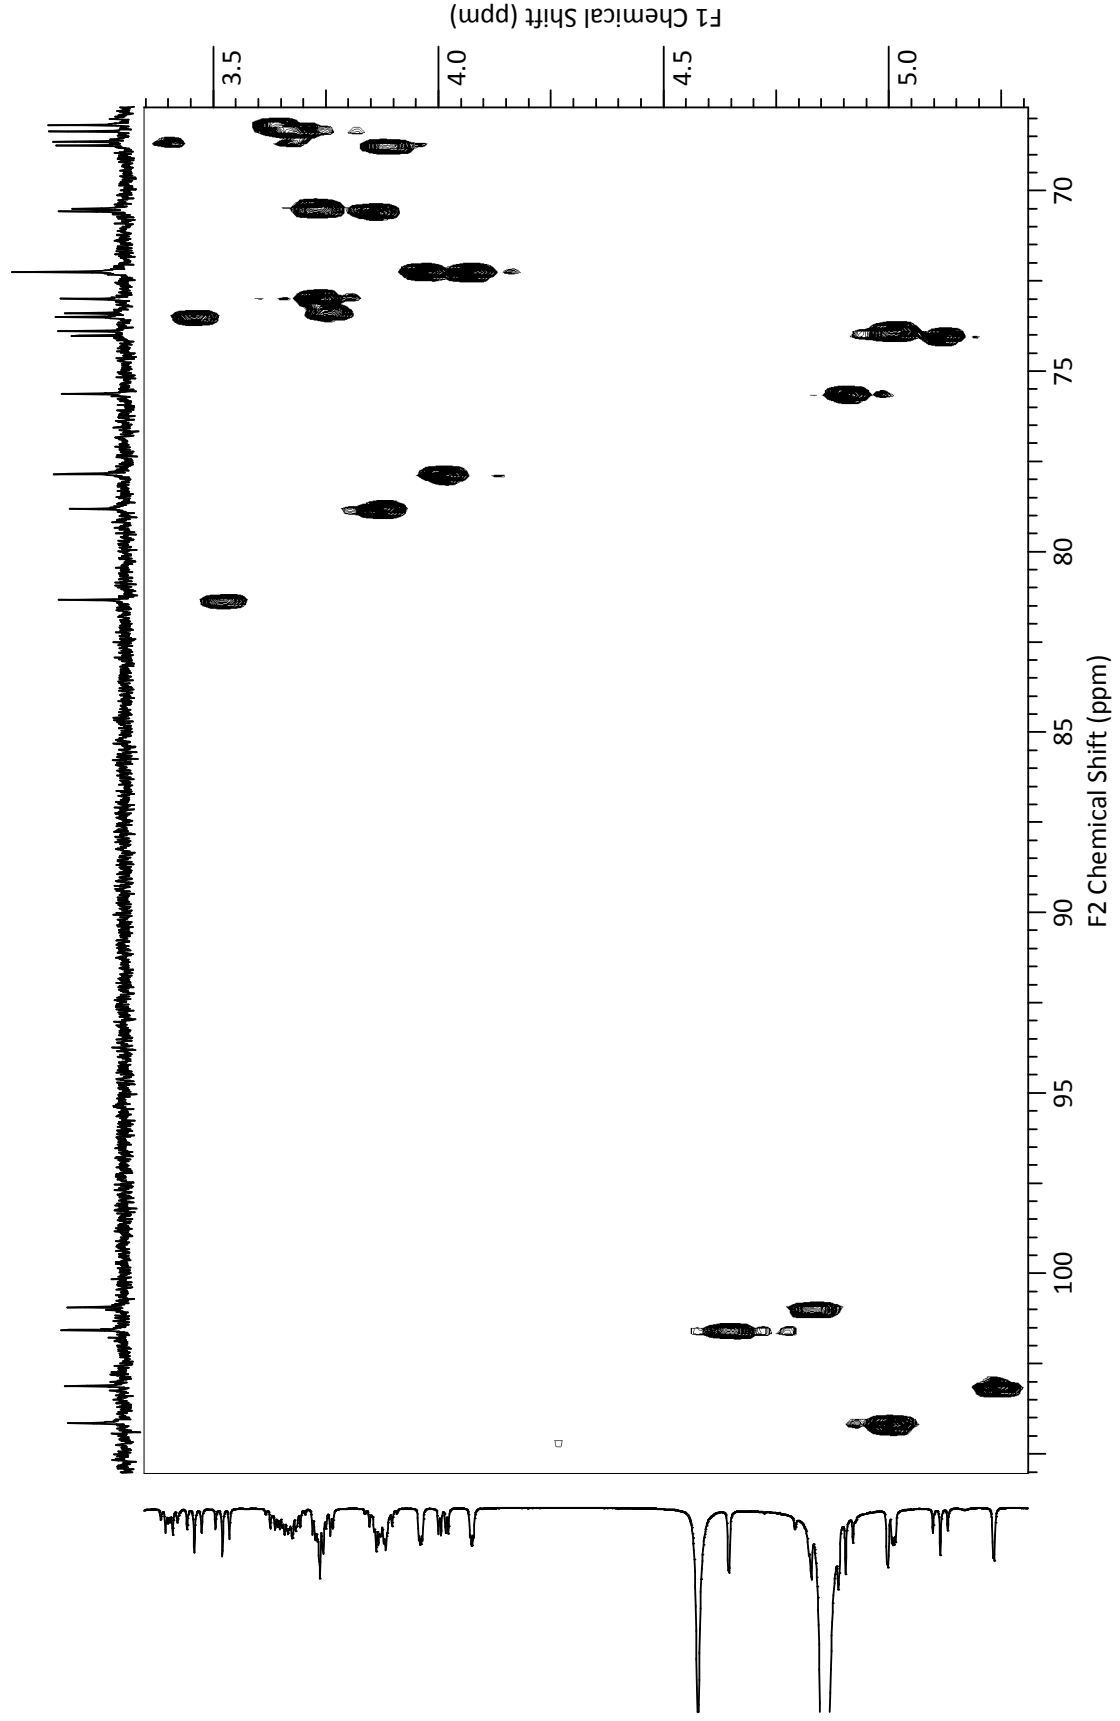

# gHMBC

Long-range correlations

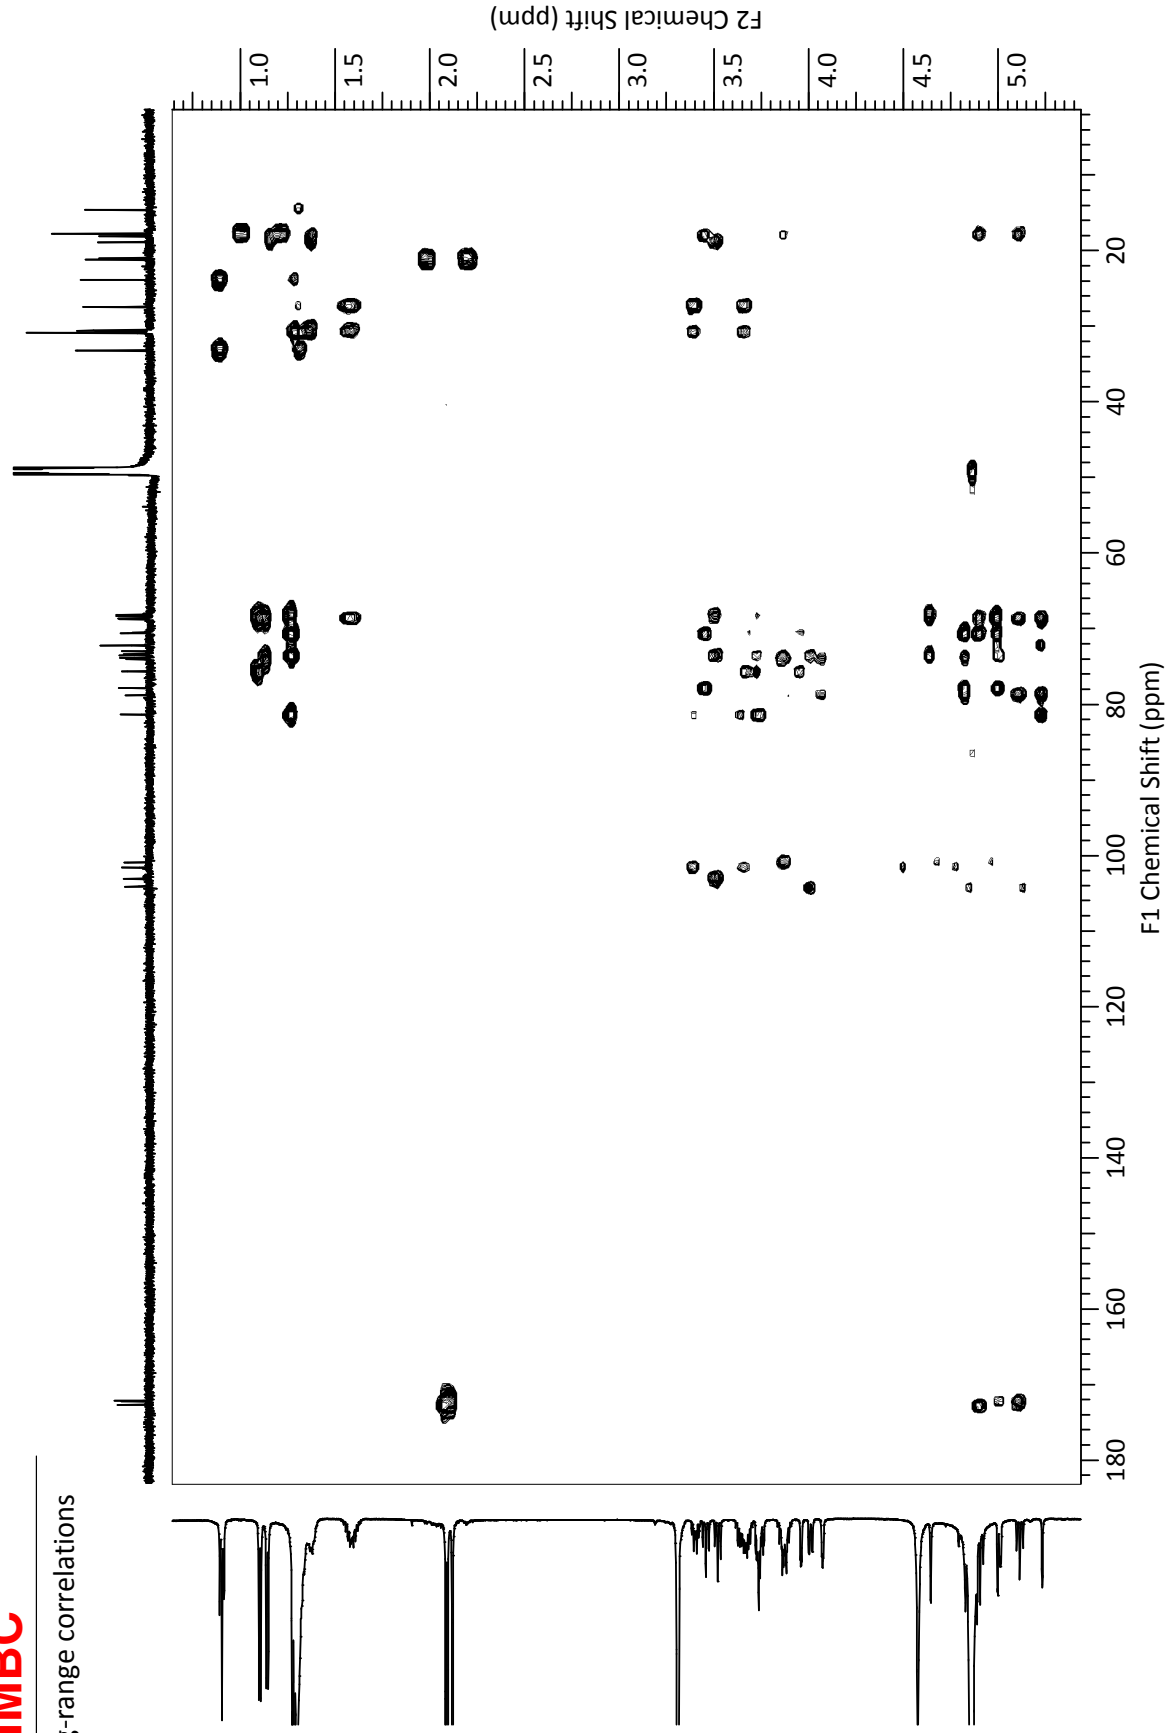

# gHMBC

Expanded portion of the gHMBC spectrum

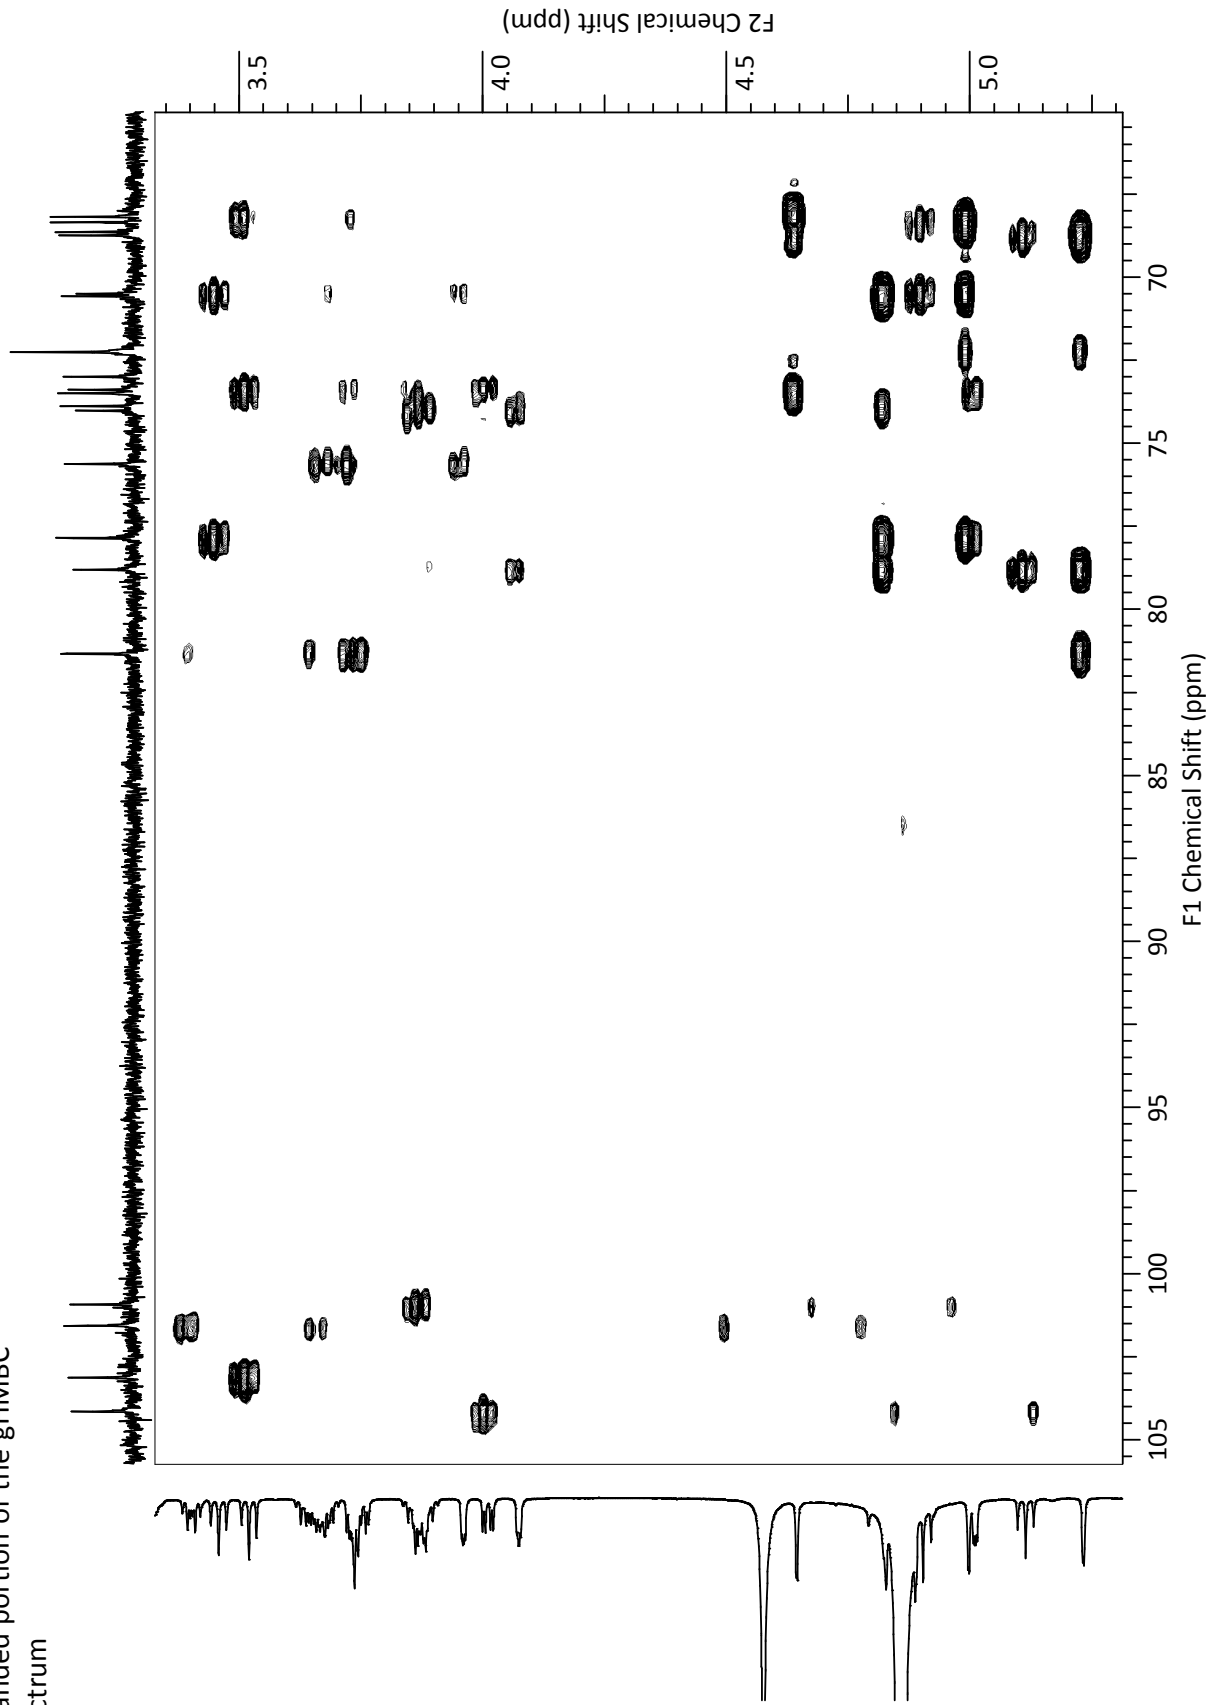



# gHMQC

One-bond correlations

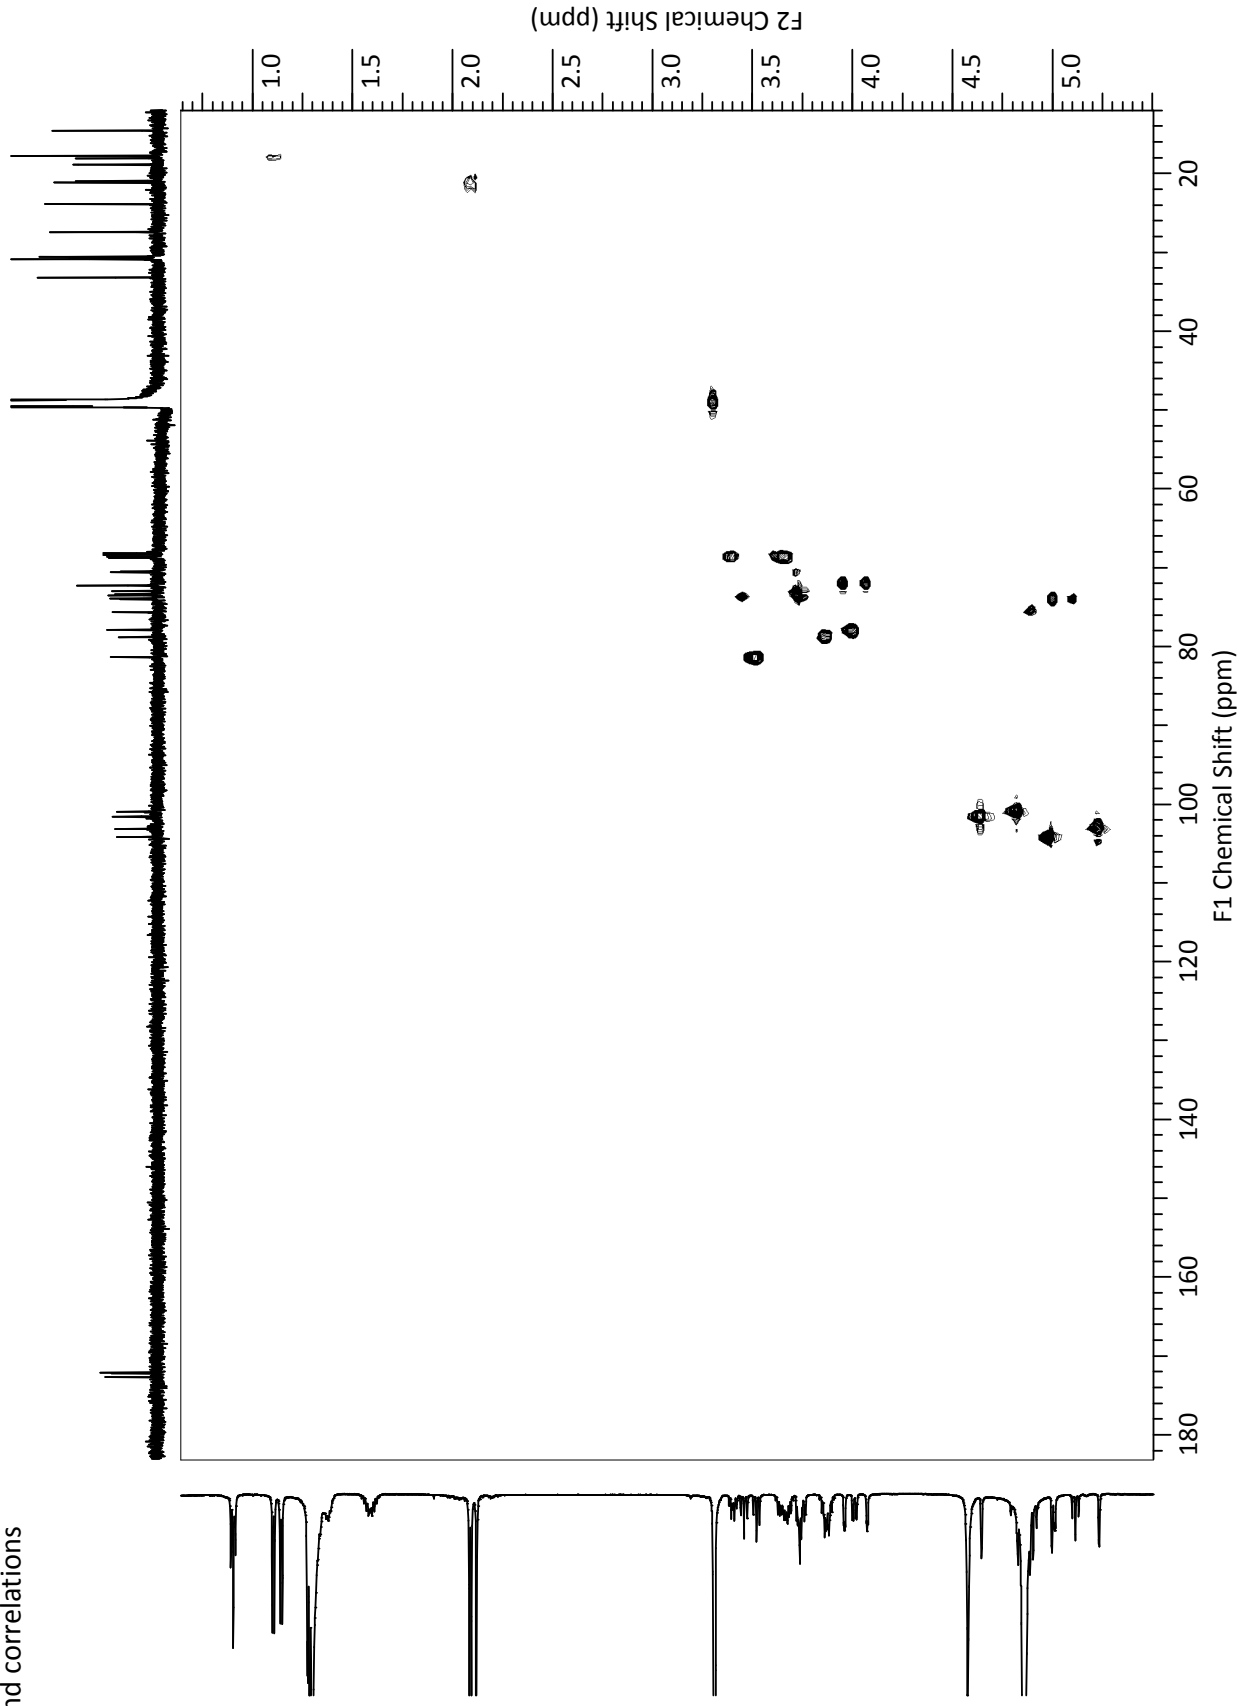

# gHMQC

Expanded portion of the gHMQC spectrum

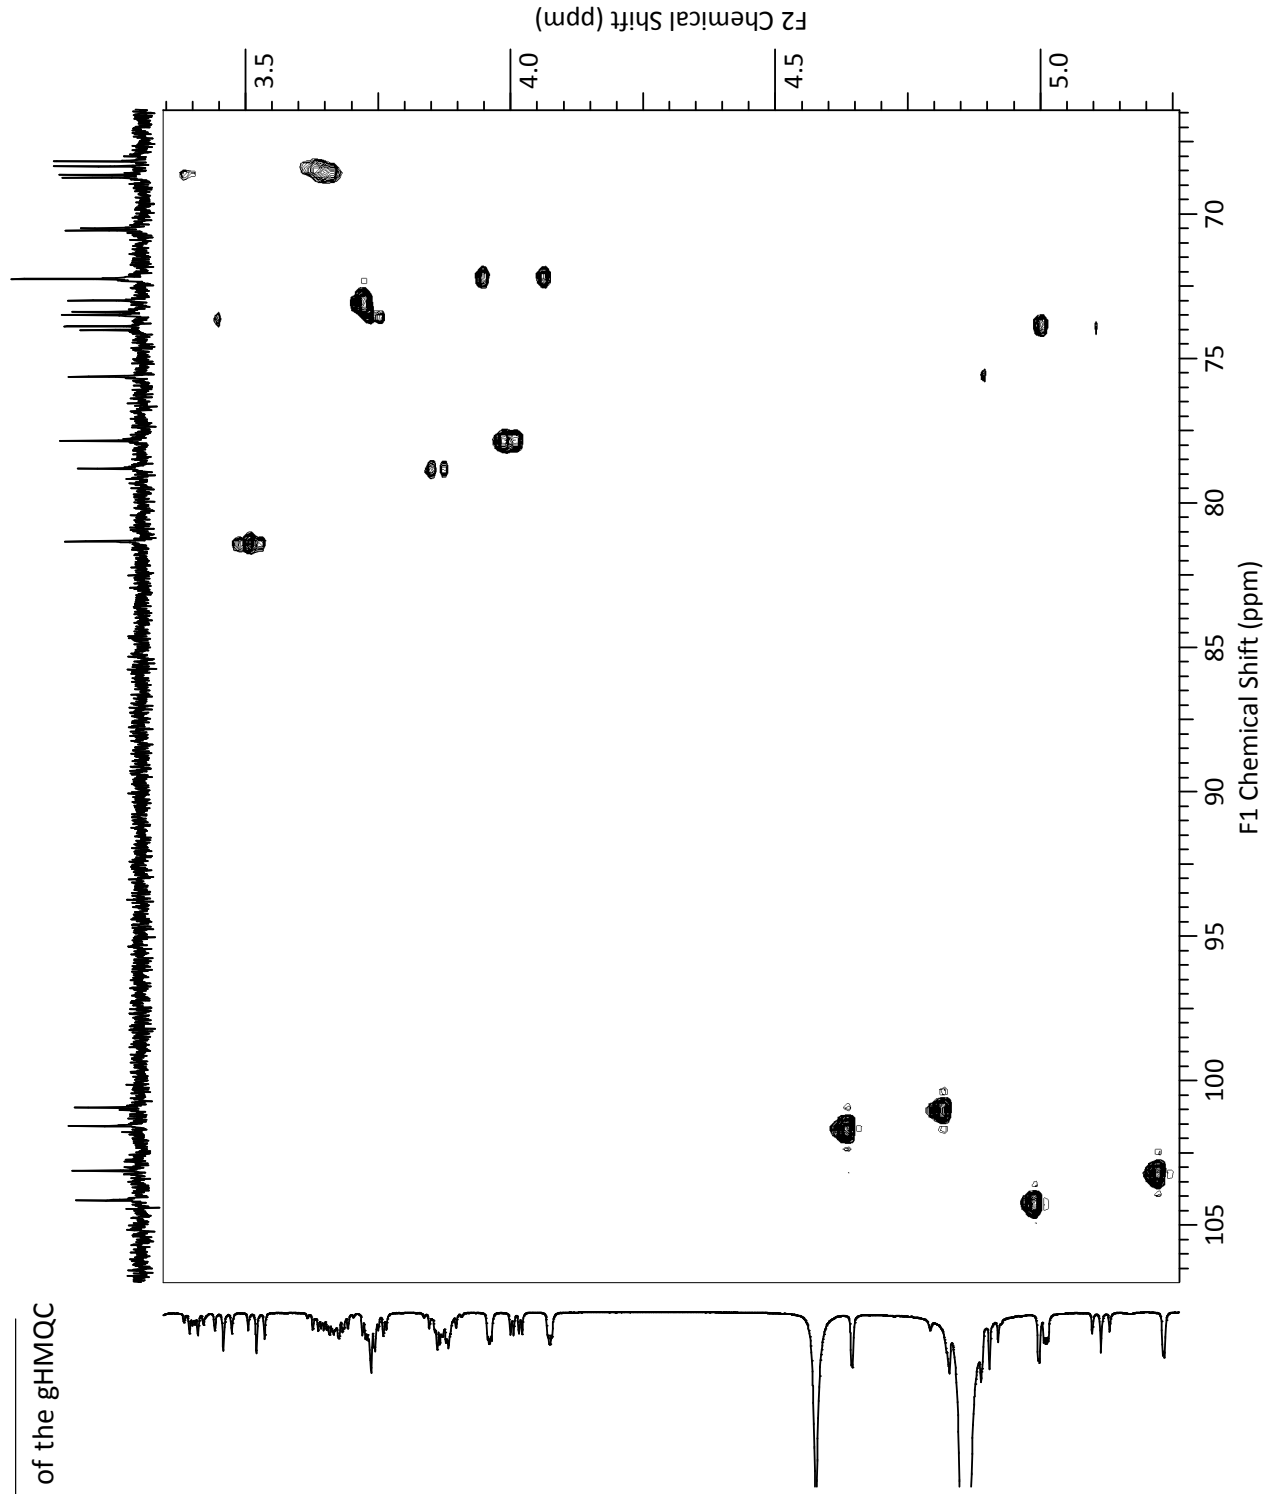

# $^{13}\text{C}$ NMR spectrum of cleistretroside in $\text{CD}_3\text{OD}$

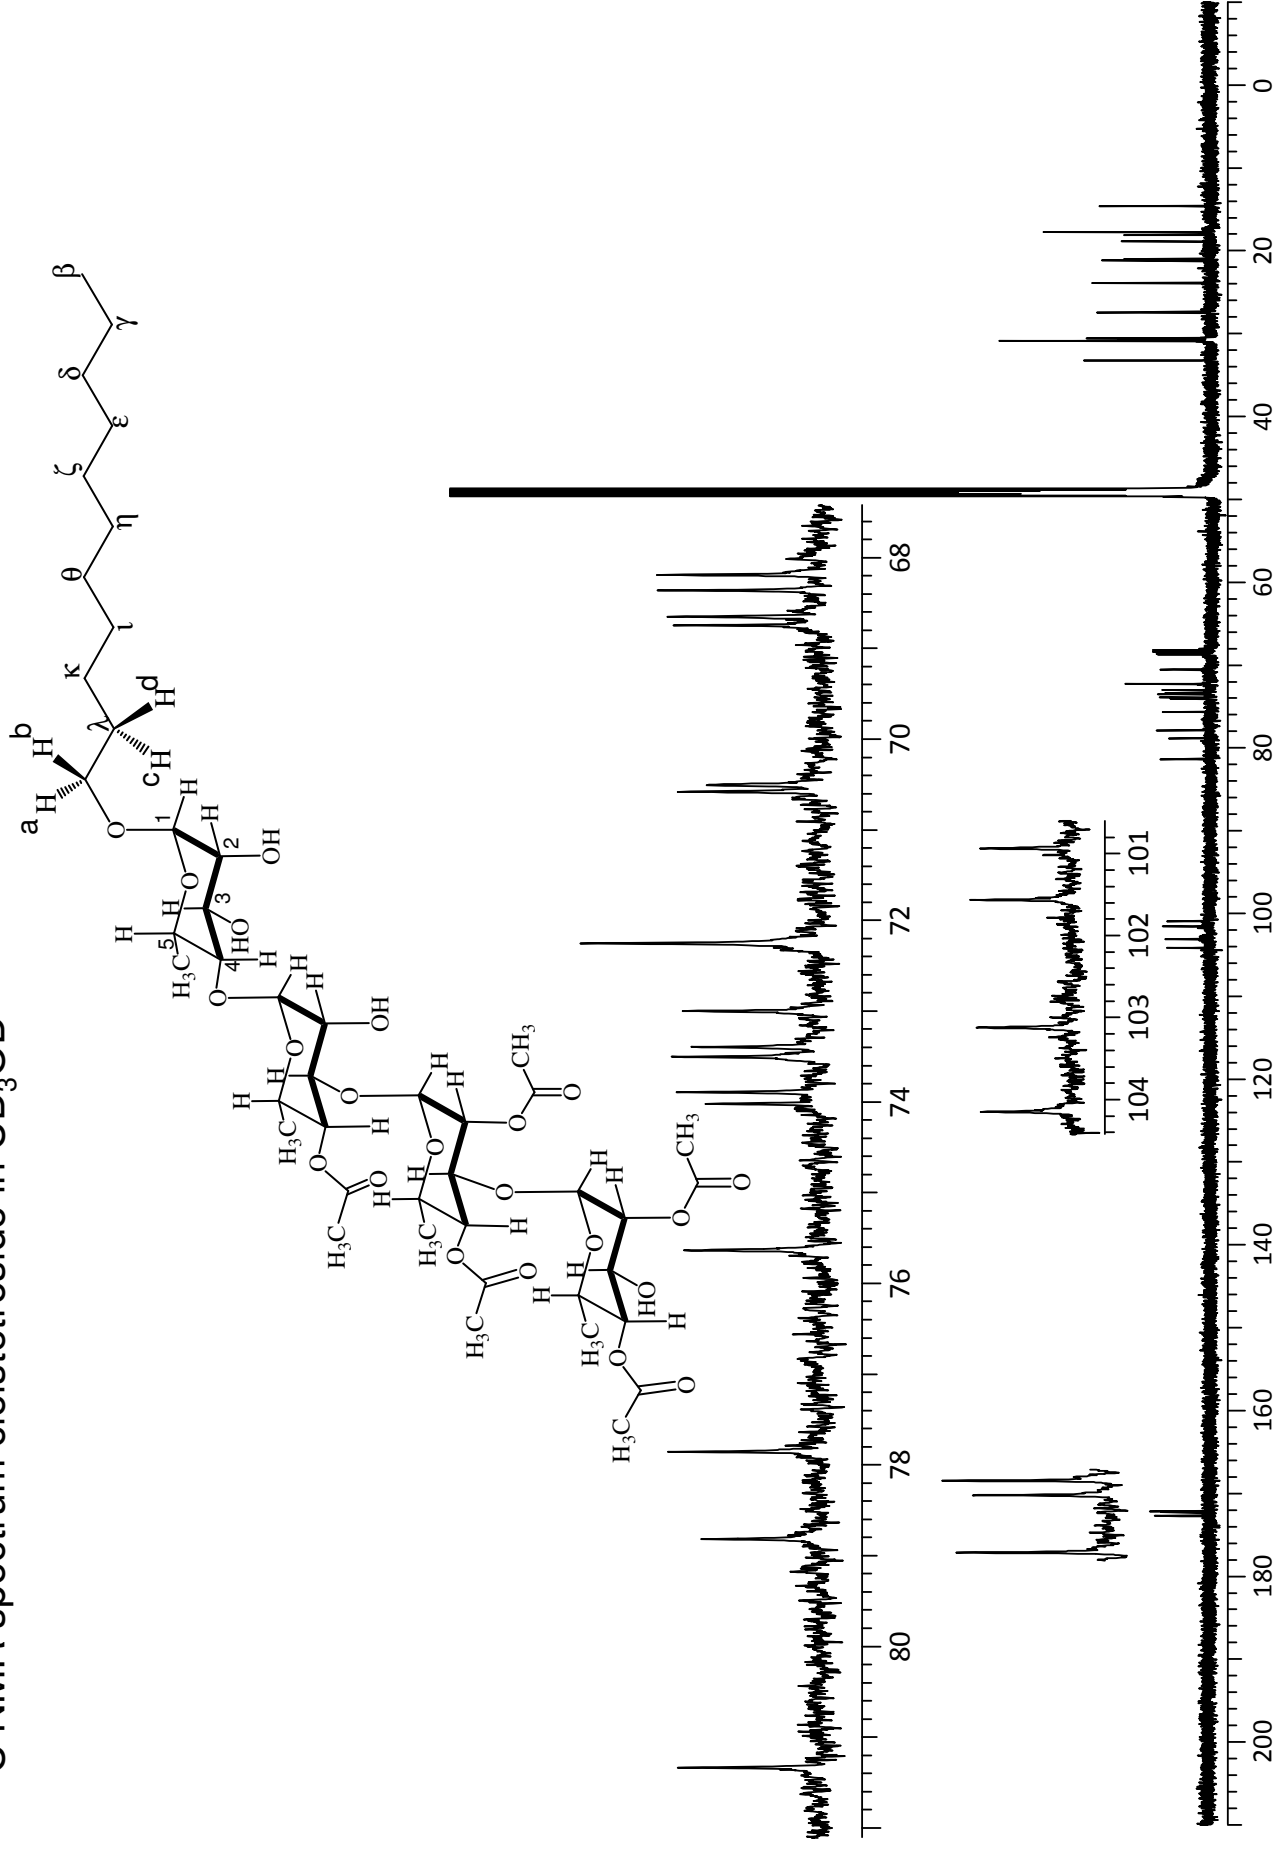

# $^{13}\text{C}$ NMR spectrum cleistretroside in $\text{CD}_3\text{OD}$

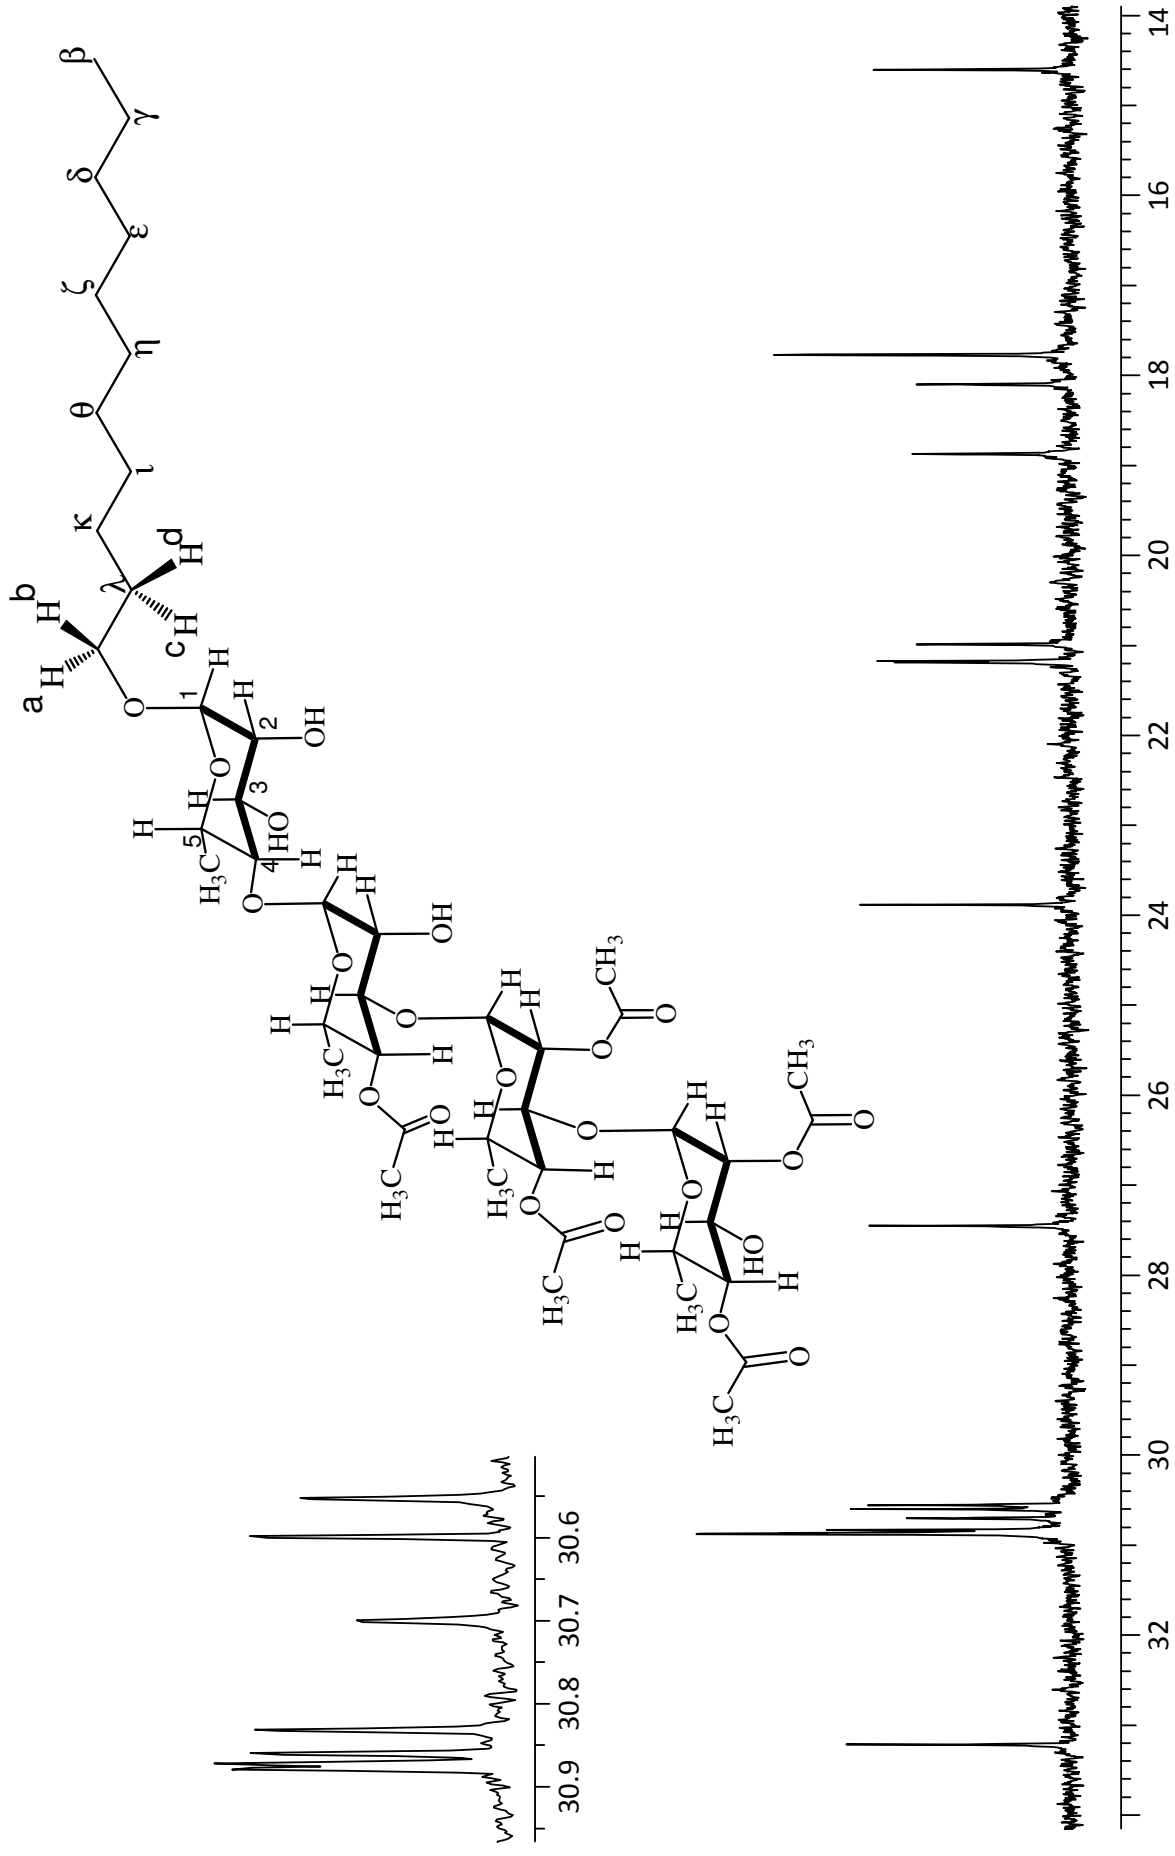

Three proton peaks ( $H_1$ ,  $H_2$ , and  $H_4$ ) of the Ring-D and one proton peak ( $H_1$ ) of the Ring-C were hidden by the residual proton peak of solvent ( $CD_3OD$ ). The  $^1H$  NMR spectrum (a) recorded at  $+60^\circ C$  exhibit separation of these peaks

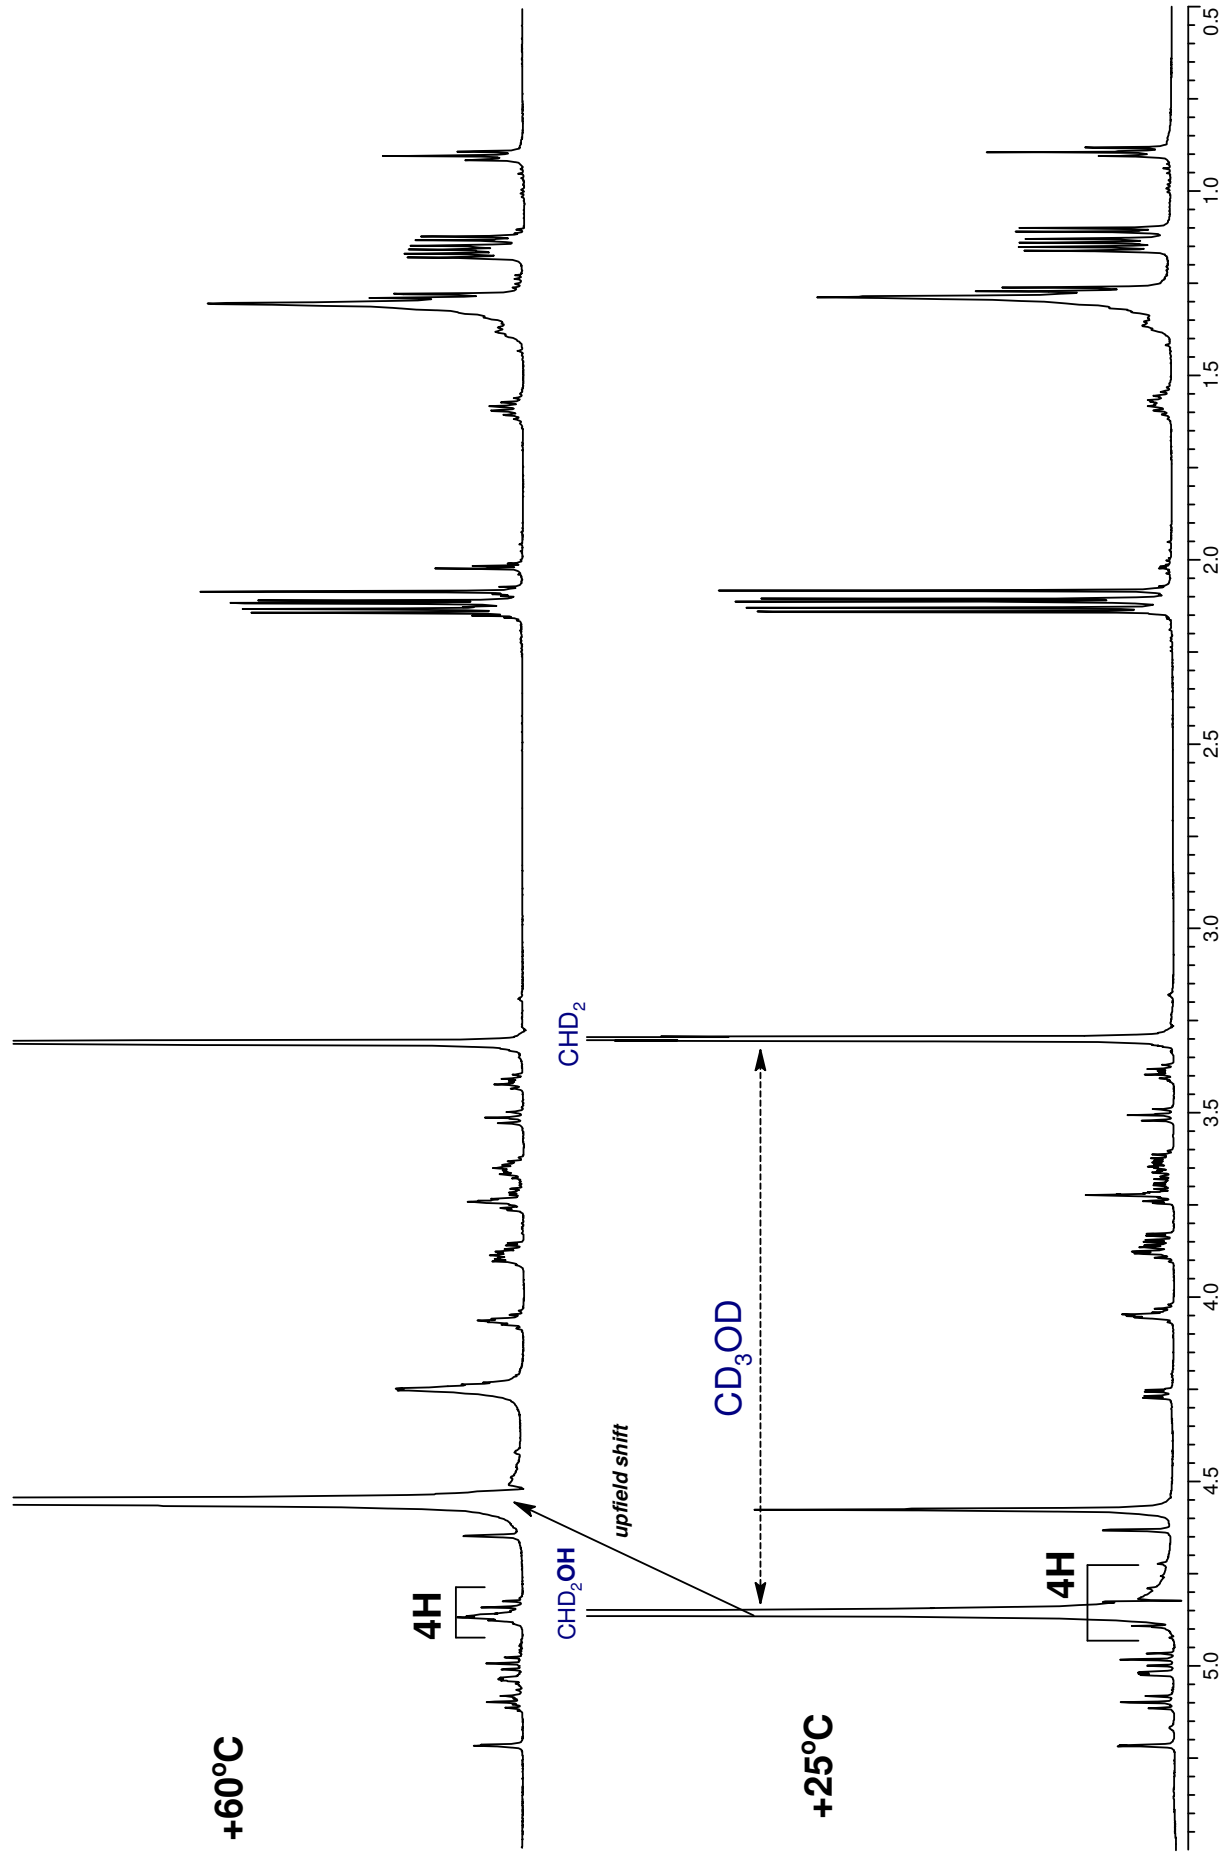

# Selective decoupled $^1\text{H}$ NMR spectra at $+60^\circ\text{C}$

Chemical shift assignments of H1, H2, and H4 (Ring D) and H1 (Ring C)

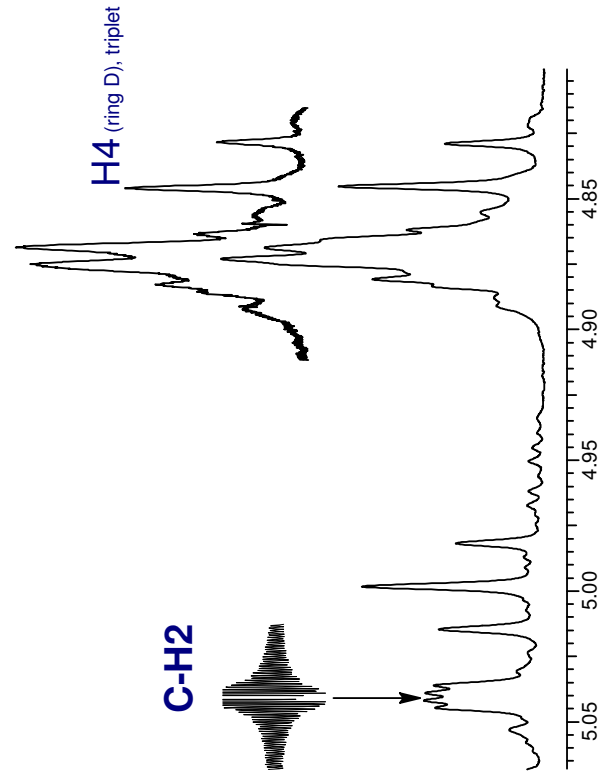

**B-H3**

4H

H1, H2, and H4 (Ring D) and H1 (Ring C)

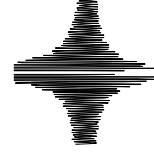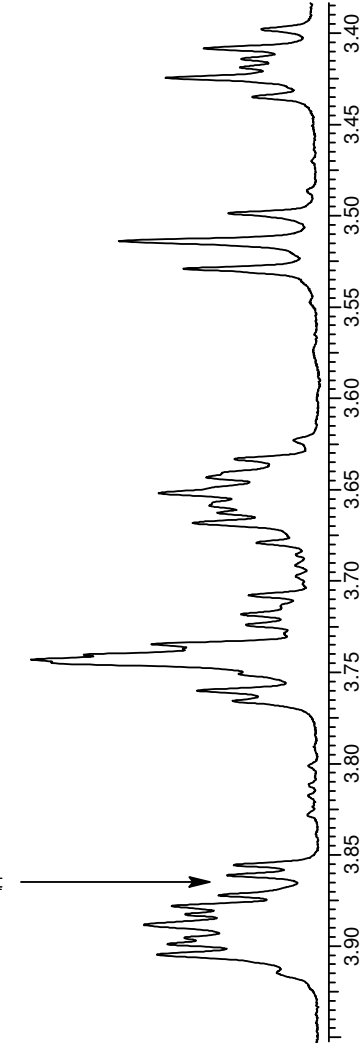

Supplement: NIHMS419017-supplement-1_si_001.pdf [file NIHMS419017-supplement-1_si_001.pdf]
